# Supplementary material for: The Polycomb Orthologues in Teleost Fishes and Their Expression in the Zebrafish Model
Source: MDPI journal article supplement (doi:10.3390/genes11040362), 2020-03-27

## cbx2 (128bp)

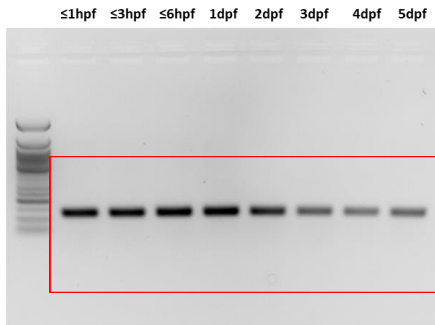

08.01.2020 - RT (600ng); RNA from first extraction

## cbx4a (130bp)

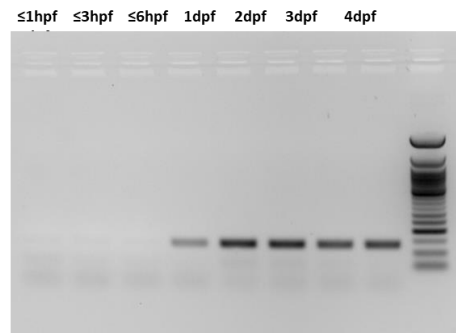

08.01.2020 - RT (600ng); RNA from first extraction

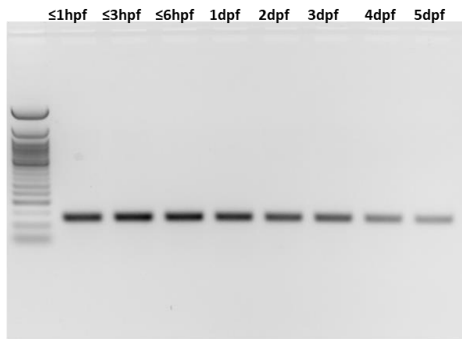

30.12.2019 - RT (1μg); RNA from first extraction

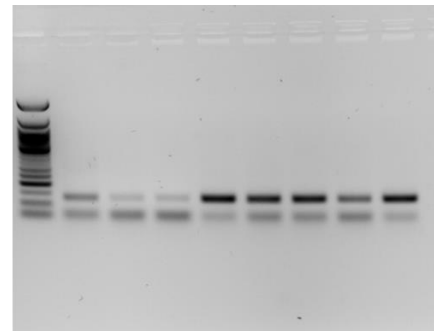

30.12.19 - RT (700ng); RNA from second extraction

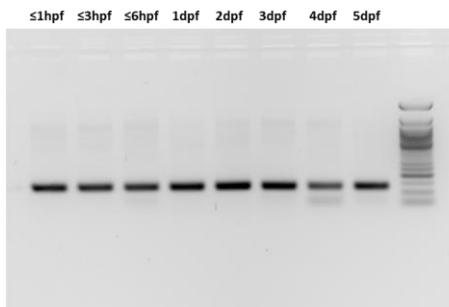

23.12.2019 - RT (700ng); RNA from second extraction

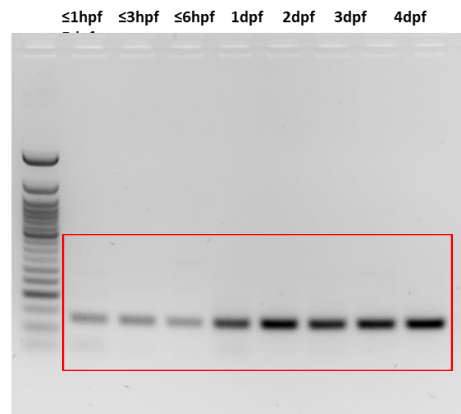

13.01.2020 - RT (600ng); RNA from first extraction

## cbx6a (167bp)

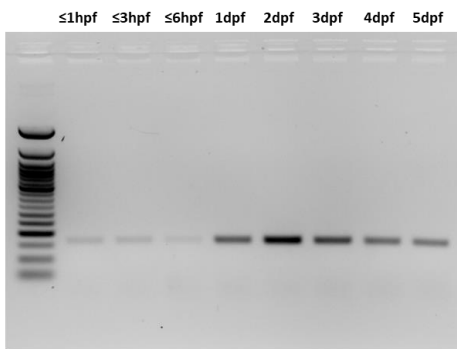

09.01.2020 - RT (600ng); RNA from first extraction

## cbx6b (163bp)

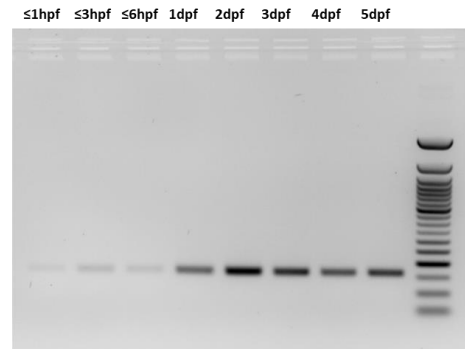

09.01.2020 - RT (600ng); RNA from first extraction

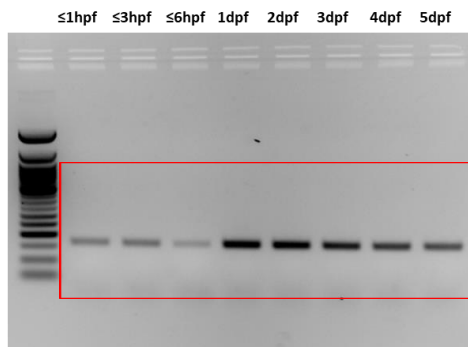

08.01.2020 - RT (700ng); RNA from second extraction

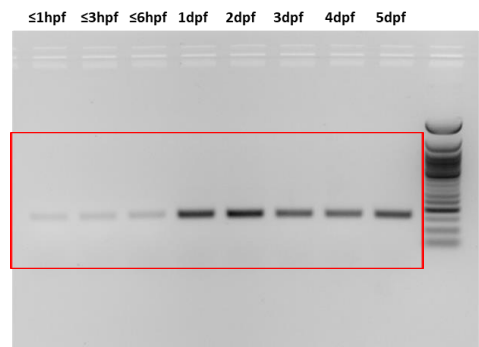

08.01.2020 - RT (700ng); RNA from second extraction

## cbx7a (243bp)

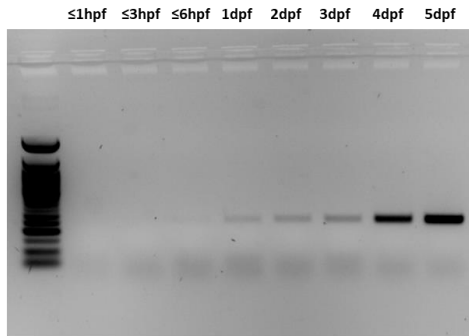

08.01.2020 - RT (700ng); RNA from second extraction

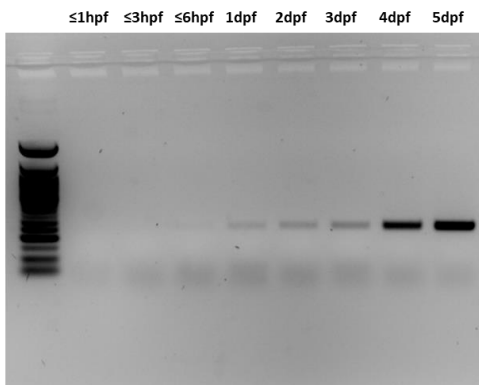

09.01.2020 - RT (600ng); RNA from first extraction

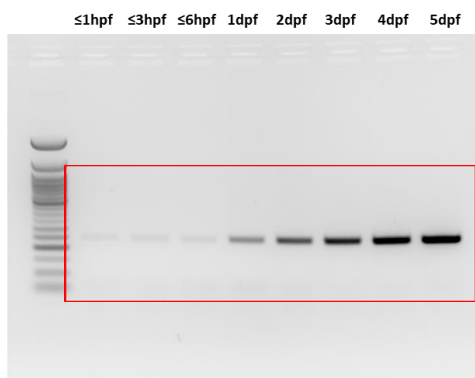

10.01.2020 - RT (600ng); RNA from first extraction (35 cycles)

## cbx7b (125bp)

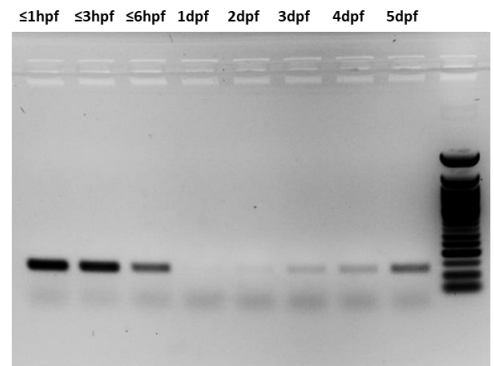

08.01.2020 - RT (700ng); RNA from second extraction

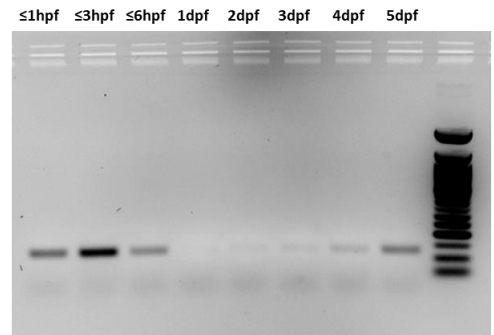

09.01.2020 - RT (600ng); RNA from first extraction

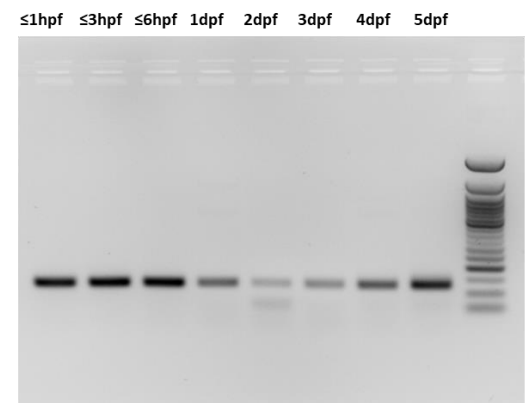

10.01.2020 - RT (600ng); RNA from first extraction (35cycles)

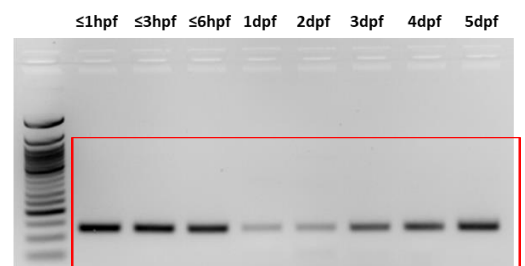

10.01.2020 - RT (700ng); RNA from second extraction (35 cycles)

## cbx8a (147bp)

## cbx8b (259bp)

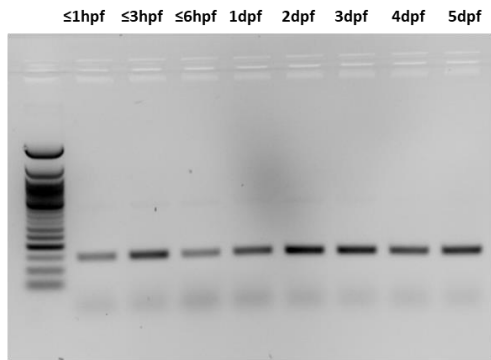

08.01.20 - RT (600ng); RNA from first extraction

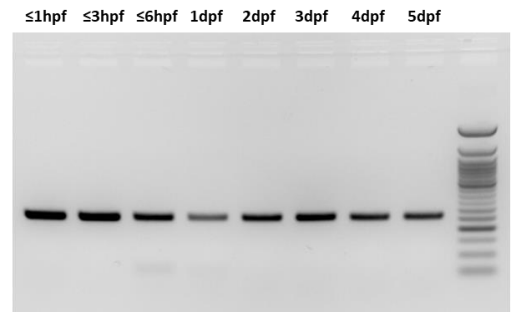

08.01.2020 - RT (600ng); RNA from first extraction

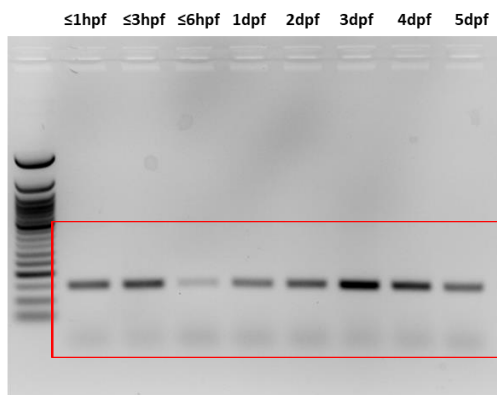

09.01.20 - RT (1μg); RNA from first extraction

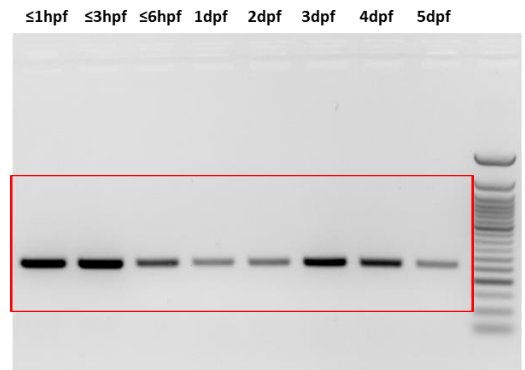

09.01.2020 - RT (1μg); RNA from first extraction

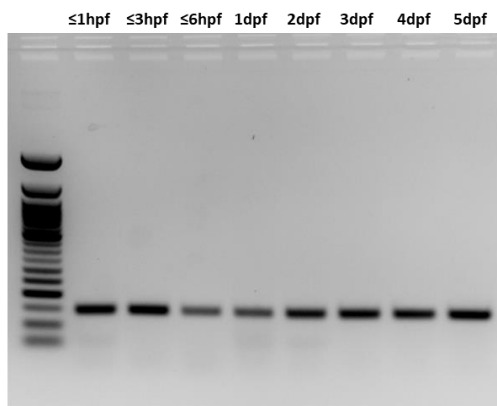

31.12.2019 - RT (700ng); RNA from second extraction

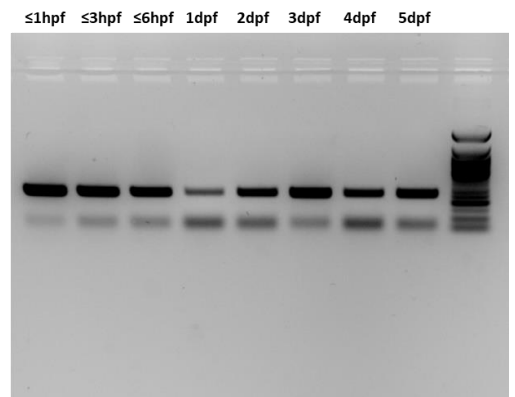

31.12.2019 - RT (700ng); RNA from second extraction

### cbx2 (128bp)

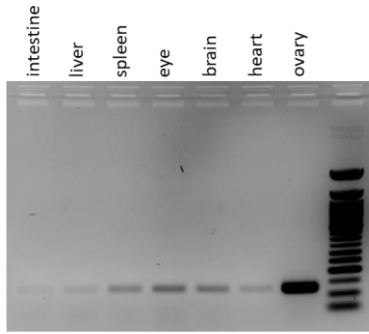

RT (1 $\mu$ g) 09.12.19; PCR 30 cycles 09.01.20

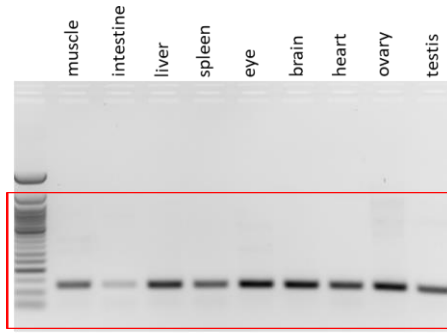

RT (500ng) 09/2019; PCR 35 cycles 14.01.20

### cbx4a (130bp)

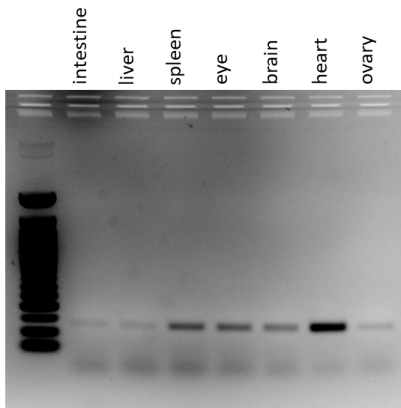

RT (1 $\mu$ g) 09.12.19; PCR 30 cycles 10.01.20

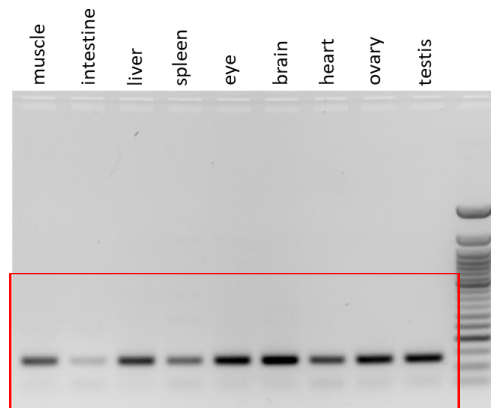

RT (500ng) 09/2019; PCR 35 cycles 14.01.20

### cbx6a (167bp)

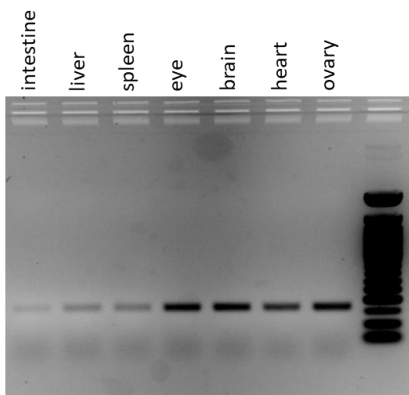

RT (1 $\mu$ g) 09.12.19; PCR 30 cycles 10.01.20

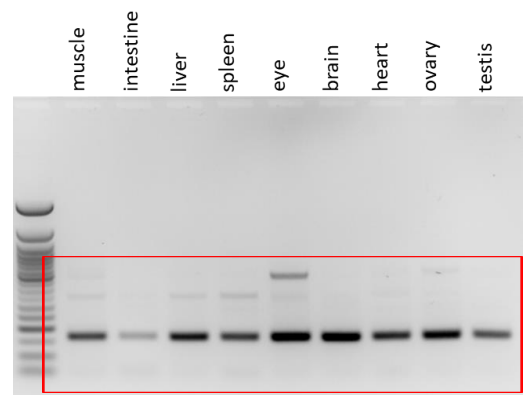

RT (500ng) 09/2019; PCR 35 cycles 14.01.20

### cbx6b (163bp)

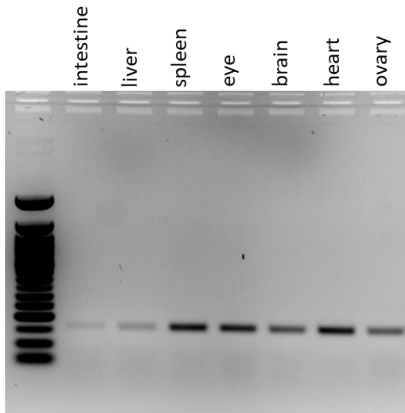

RT (1µg) 09.12.19; PCR 30 cycles 10.01.20

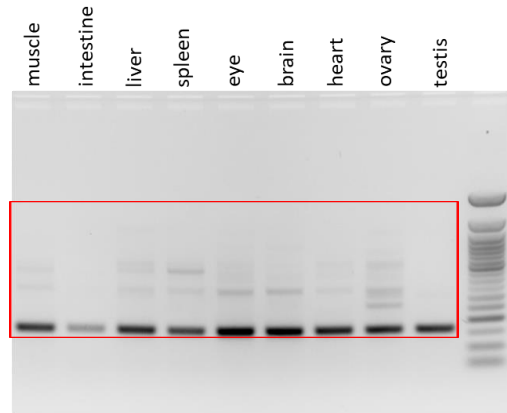

RT (500ng) 09/2019; PCR 35 cycles 14.01.20

### cbx7a (243bp)

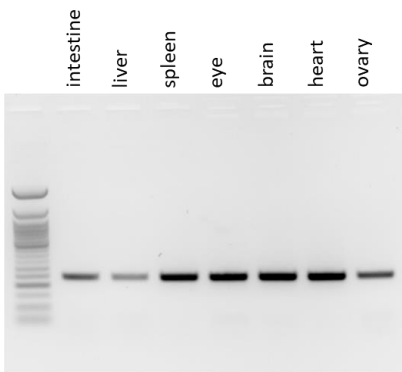

RT (1µg) 09.12.19; PCR 35 cycles 10.01.20

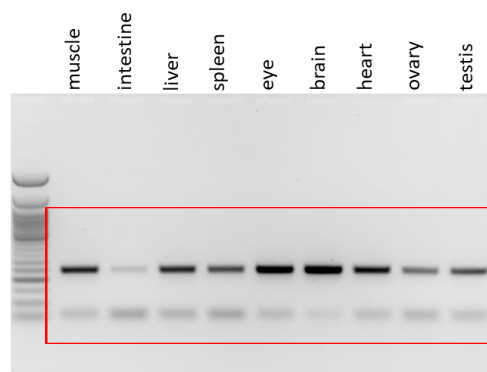

RT (500ng) 09/2019; PCR 35 cycles 14.01.20

### cbx7b (125bp)

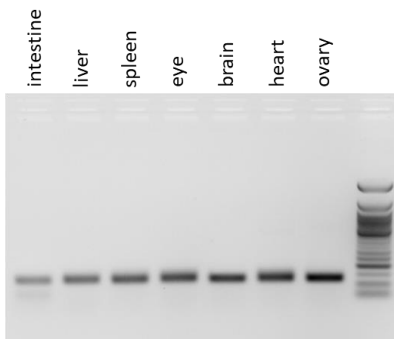

RT (1µg) 09.12.19; PCR 35 cycles 10.01.20

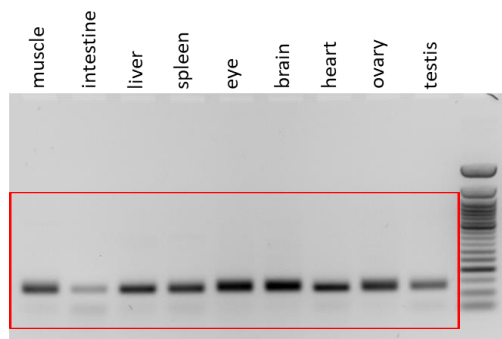

RT (500ng) 09/2019; PCR 35 cycles 14.01.20

### cbx8a (147bp)

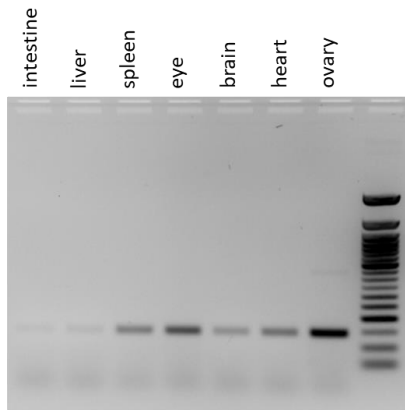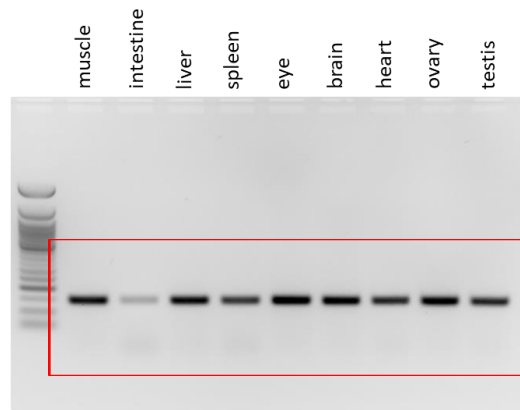

### cbx8b (259bp)

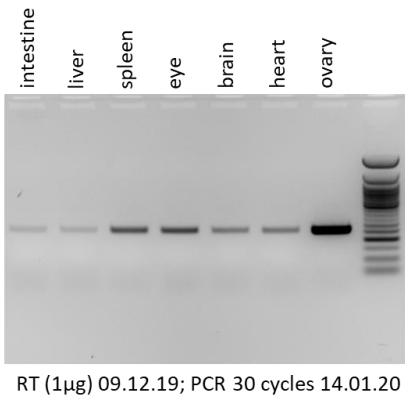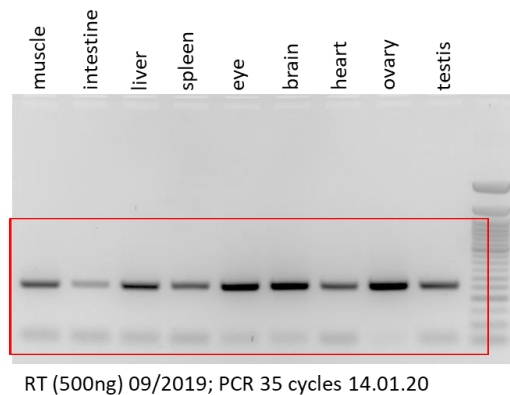

### b-actin (reference gene; 443bp)

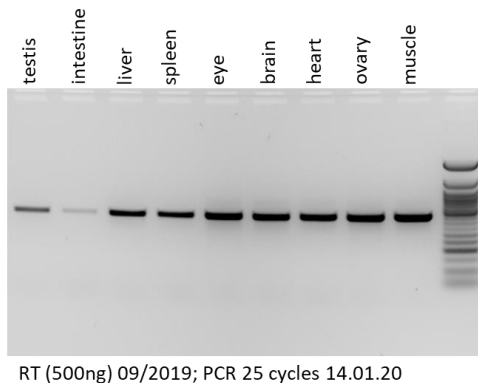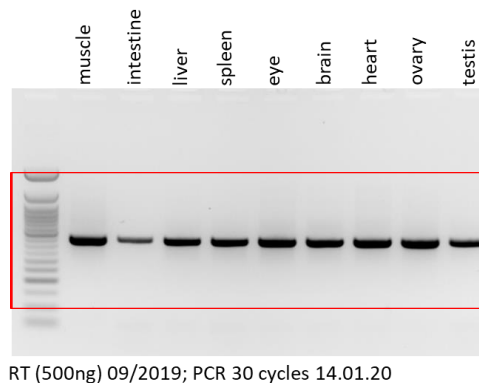

Supplement: s1 [file s1]
