# Supplementary material for: The Polycomb Orthologues in Teleost Fishes and Their Expression in the Zebrafish Model
Source: MDPI journal article supplement (doi:10.3390/genes11040362), 2020-03-27
Supplement: s1 [file s1]

|                  | 10                                                              | 20 | 30 | 40 | 50 | 60 |
|------------------|-----------------------------------------------------------------|----|----|----|----|----|
| Sgr_LOC107585029 | MELSAAGDRVFAAEAILKRRIRKGRMEYLVKWKGWAIKYSTWEPEENILDERLVAAFEQK    |    |    |    |    |    |
| San_LOC107662367 | MELSAAGDRVFAAEAILKRRIRKGRMEYLVKWKGWAIKYSTWEPEENILDERLVAAFEQK    |    |    |    |    |    |
| Srh_LOC107740604 | MELSAAGDRVFAAEAILKRRIRKGRMEYLVKWKGWAIKYSTWEPEENILDERLVAAFEQK    |    |    |    |    |    |
| Cau_LOC113046746 | MELSAAGDRVFAAEAILKRRIRKGRMEYLVKWKGWAIKYSTWEPEENILDERLVAAFEQK    |    |    |    |    |    |
| Cca_LOC109095357 | MELSAAGDRVFAAEAILKRRVRKGRMEYLVKWKGWAIKYSTWEPEENILDERLVAAFEQK    |    |    |    |    |    |
| Cau_LOC113047918 | MELSAAGDRVFAAEAILKRRVRKGRMEYLVKWKGWAIKYSTWEPEENILDERLVAAFEQK    |    |    |    |    |    |
| Sgr_LOC107602318 | MELSAAGDRVFAAEAIMKRRVRKGRMEYLVKWKGWAIKYSTWEPEENILDERLVAAFEQK    |    |    |    |    |    |
| San_LOC107690738 | MELSAAGDRVFAAEAIMKRRVRKGRMEYLVKWKGWAIKYSTWEPEENILDERLVAAFEQK    |    |    |    |    |    |
| Srh_LOC107710048 | MELSAAGDRVFAAEAIMKRRIRKGRMEYLVKWKGWAIKYSTWEPEENILDERLVAAFEQK    |    |    |    |    |    |
| Dre_Cbx6b        | MELSAAGDRVFAAEAILKRRVRKGRMEYLVKWKGWAIKYSTWEPEENILDERLVAAFEQK    |    |    |    |    |    |
| Ame_cbx6b        | MELSAAGDRVFAAEAILKRRVRKGRMEYLVKWKGWAIKYSTWEPEENILDDRDLVAAFEQK   |    |    |    |    |    |
| Pna_LOC108413245 | MELSAAGDRVFAAEAILKRRVRKGRMEYLVKWKGWAIKYSTWEPEENILDERLVAAFEQK    |    |    |    |    |    |
| Ipu_LOC108260787 | MELSAAGDRVFAAEAILKRRVRKGRMEYLVKWKGWAIKYSTWEPEENILDDRDLVAAFEQK   |    |    |    |    |    |
| Eel_LOC113569862 | MELSVAGDRVFAAEAILKRRVRKGRIEYLVKWKGWAIKYSTWEPEENILDDRDLVAAFEQK   |    |    |    |    |    |
| Srh_LOC107720374 | MEVSAVGGEQVFPAEAILKSRVRKGRIEYLVKWKGWALKHSTWEPEENILDDRDLITAFEQK  |    |    |    |    |    |
| San_LOC107667890 | MEVSTVGEQVFPAEAILKSRVRKGQIEYLVKWKGWALKHSTWEPEENILDDRDLITAFEQK   |    |    |    |    |    |
| Cca_LOC109066300 | MEVSAVGGERVFPAAEAILKSRVRKGRIEYLVKWKGWALKHSTWEPEENILDDRDLITAFEKK |    |    |    |    |    |
| Cau_LOC113065021 | MEVSAVGGERVFPAAEAILKSRVRKGRIEYLVKWKGWALKHSTWEPEENILDDRLLAAFEQK  |    |    |    |    |    |
| Sgr_LOC107602676 | MELSAVGGERVFAAEAILKSRVRKGRIEYLLKWKGWALKHSTWEPEENILDDRDLITAFEQK  |    |    |    |    |    |
| San_LOC107704552 | MELSAVGGERVFAAEAILKSRVRKGRIEYLLKWKGWALKHSTWEPEENILDDRDLITAFEQK  |    |    |    |    |    |
| Srh_LOC107717667 | MELSAVGGERVFAAEAILKSRVRKGRIEYLLKWKGWALKHSTWEPEENILDDRDLITAFEKK  |    |    |    |    |    |
| Cca_LOC109066296 | MELSAEGERVFAAEAILKSRVRKGRIEYLVKWKGWALKHSTWEPEENILDDRDLITAFEQK   |    |    |    |    |    |
| Cau_LOC113039859 | MELSAEGERVFAAEYILKSRVRKGRIEYLVKWKGWALKHSTWEPEENILDDRDLITAFEQK   |    |    |    |    |    |
| Dre_Cbx6a        | MELSAAGDRVFAAEAILKSRVKGHIYLVKWKGWALKHSTWEPEENILDDRDLITAFEQK     |    |    |    |    |    |
| Ame_LOC103038090 | MELSGMGERVFAAEAILKRRVRKSNIEYLVKWKGWALKHSTWEPEENILDDRDLITAFEKK   |    |    |    |    |    |
| Pna_Cbx6         | MELSAMGDRVFAAEAILKRRVRKGSIEYLVKWKGWALKHSTWEPEENILDRGLITAFEQK    |    |    |    |    |    |
| Eel_LOC113585732 | MELSAIGDRVFAAEAILKRRVRKGRIEYLVKWKGWALKHSTWEPEENILDDRDLITAFERK   |    |    |    |    |    |
| Ipu_LOC108259424 | MELTAIGDRVFAAEAILKRRVRKGNIEYLVKWKGWALKHSTWEPEENILDDRDLITAFERK   |    |    |    |    |    |
| Dcl_LOC114786320 | MELSAVGDRVFAAEAILKRRVRKGRIEYLVKWKGWALKYSTWEPEENILDDRDLITGFERK   |    |    |    |    |    |
| Cha_LOC105903838 | MELSAVGDRVFAAEAILKRRVRKGQIEYLVKWKGWALKNSTWEPEENILDDRDLITAFEQK   |    |    |    |    |    |
|                  | ***: **:*.*.* *:* *:*** :***:*****:* ***** ***: **:             |    |    |    |    |    |
| Prim.cons.       | MELSAAGDRVFAAEAILKRRVRKGRIEYLVKWKGWALKYSTWEPEENILDDRDLVAAFEQK   |    |    |    |    |    |

|                  | 70                                                         | 80 | 90 | 100 | 110 | 120 |
|------------------|------------------------------------------------------------|----|----|-----|-----|-----|
| Sgr_LOC107585029 | EREQEMYGP-----KKRGPKPKTLLKLSRAQVAETSSRVP-----EFKHTRPQ      |    |    |     |     |     |
| San_LOC107662367 | EREQEMYGP-----KKRGPKPKTLLKLSRAQVAETSSRVP-----EFKHTRPQ      |    |    |     |     |     |
| Srh_LOC107740604 | EREQEMYGP-----KKRGPKPKTLLKLSRAQVAETSSRVP-----EFKHTRPQ      |    |    |     |     |     |
| Cau_LOC113046746 | EREQELYGP-----KKRGPKPKTLLKLSRAQVADTSSRVP-----EFKHTRPQ      |    |    |     |     |     |
| Cca_LOC109095357 | EREQEMYGP-----KKRGPKPKTLLKLSRAQVAETSSRVP-----EFKHTRPQ      |    |    |     |     |     |
| Cau_LOC113047918 | EREQEMYGP-----KKRGPKPKLTLKLSRAQVAETSSRVP-----EFKHTRPK      |    |    |     |     |     |
| Sgr_LOC107602318 | EREQELYGP-----KKRGPKPKTLLKLSRAQVTETSSRVP-----QFKHTRPQ      |    |    |     |     |     |
| San_LOC107690738 | EREQEMYGP-----KKRGPKPKLTLKLSRAQVAETSSRVP-----EFKHTRPQ      |    |    |     |     |     |
| Srh_LOC107710048 | EREQEMYGP-----KKRGPKPKTLLKLSRAQVAETSSRVP-----ELKHTRPQ      |    |    |     |     |     |
| Dre_Cbx6b        | EREQEMYGP-----KKRGPKPKTLLKLSRAQAE--SPRVP-----EFKHSRPQ      |    |    |     |     |     |
| Ame_cbx6b        | EREQELYGP-----KKRGPKPKTLLKLSRAQTSDTPHRVP-----EFKHTRPQ      |    |    |     |     |     |
| Pna_LOC108413245 | EREQELYGP-----KKRGPKPKTLLKLSRAQASDGTTPRVP-----EFKHTRPQ     |    |    |     |     |     |
| Ipu_LOC108260787 | EREQELYGP-----KKRGPKPKTLLKLSRAQAESSPRVL-----EFKPSRPQ       |    |    |     |     |     |
| Eel_LOC113569862 | EREQELYGP-----KKRGPKPKTLLKLSRAHAAGESPVP-----EFKHSRPQ       |    |    |     |     |     |
| Srh_LOC107720374 | EREQELYGP-----KKRGPKPKNFVLKARAQAGD-RPRSS-----NTRRTPPR      |    |    |     |     |     |
| San_LOC107667890 | XRQELYGP-----KKRGPKPKNFVLKARAQAGD-RPRSS-----NTRRTPPR       |    |    |     |     |     |
| Cca_LOC109066300 | EREQELYGP-----KKRGPKPKNFVLKARAQAGD-RPRSS-----DTQRTPPQ      |    |    |     |     |     |
| Cau_LOC113065021 | ERQELYGP-----KKRGPKPKNFVLKARAHAGD-RPRSSDTQRTPPQISNTQRTPPR  |    |    |     |     |     |
| Sgr_LOC107602676 | ERQELYGP-----KKRGPKPKNFVLKARAQAGD-RPRSS-----NTQRTPPR       |    |    |     |     |     |
| San_LOC107704552 | ERQELYGP-----KKRGPKPKNFVLKARAQAGD-RPRSS-----NTQRTPPR       |    |    |     |     |     |
| Srh_LOC107717667 | EREQELYGP-----KKRGPKPKNFVLKARAQAGD-KPRSS-----NTQRTPPR      |    |    |     |     |     |
| Cca_LOC109066296 | EREQELYGP-----KKRGPKPKNFVLKARAQAGD-RPRSS-----NTQRTPPR      |    |    |     |     |     |
| Cau_LOC113039859 | EREQELYGP-----KKRGPKPKNFVLKARAQAGD-RPRSS-----NTQRTPPR      |    |    |     |     |     |
| Dre_Cbx6a        | EREQELYGPEQELYGPKRGPKPKNFVLKARAQSGD-RPRSS-----YTRRTPPS     |    |    |     |     |     |
| Ame_LOC103038090 | EREQELYGP-----KKRGPKPKNLLKARTQP---SPRVS-----KTRNTPPR       |    |    |     |     |     |
| Pna_Cbx6         | EREQELYGP-----KKRGPKPKNLLKARAQTGETSSRGS-----SARHTPPH       |    |    |     |     |     |
| Eel_LOC113585732 | EREQELYGP-----KKRGPKPKTFVLKARAQAGEPSSRGS-----TTRQAPPR      |    |    |     |     |     |
| Ipu_LOC108259424 | ERDQELYGP-----KKRGPKPKNFVLKARAQAGETLSRGS-----STRRAPPC      |    |    |     |     |     |
| Dcl_LOC114786320 | EREQELYGP-----KKRGPKPKNFILKARAQAGTSDTSNRFS-----VARQTHNR    |    |    |     |     |     |
| Cha_LOC105903838 | ERQELYGP-----KKRGPKPKNFVLKARAHAGETSSRAT-----DPRQLISR       |    |    |     |     |     |
|                  | *:*:*:* *:*:*:* *:*:*:* *:*:*:* *:*:*:* *:*:*:* *:*:*:*    |    |    |     |     |     |
| Prim.cons.       | EREQELYGPEQELYGPKRGPKPKN2LLKARAQAG2TSRVSQTQRTPPQISE2KHTPPQ |    |    |     |     |     |

|                  | 130        | 140          | 150             | 160       | 170           | 180       |
|------------------|------------|--------------|-----------------|-----------|---------------|-----------|
| Sgr_LOC107585029 | QHSKLPPPS  | -----AAP     | -----SYTPTAP    | PSNAKLQ   | SGTAQP        | KLKKDIHRC |
| San_LOC107662367 | QHSKLPPPS  | -----AAP     | -----SYTPTAP    | PSNAKLQ   | SGTAQP        | KLKKDIHRC |
| Srh_LOC107740604 | QHSKLPPPS  | -----AAP     | -----SYTPTAP    | PSNAKLQ   | SGTAQP        | KLKKDIHRC |
| Cau_LOC113046746 | QHSKLPPPS  | -----ATP     | -----SYTPTVP    | PSNAKLQ   | SGTAQP        | KLKKDIHRC |
| Cca_LOC109095357 | QHSKLPPPS  | -----AAP     | -----SYTPTAP    | PSNAKLQ   | SGTAQP        | KLKKDIHRC |
| Cau_LOC113047918 | QHSKFPPPS  | -----AAP     | -----SYTPTAP    | PSNAKLQ   | SGTAQP        | KLKKDIHRC |
| Sgr_LOC107602318 | QHSKLPPPS  | -----AAP     | -----SYTPTT     | PSNAKLQ   | SGAAQP        | KLKKDIHRC |
| San_LOC107690738 | QHSKLPPPS  | -----AAP     | -----SYTPAA     | PSNAKLQ   | SGAAQP        | KLKKDIHRC |
| Srh_LOC107710048 | QHSKLPPPS  | -----AAP     | -----SYTPTAP    | PSNAKLQ   | SGAAQP        | KLKKDIHRC |
| Dre_Cbx6b        | PHSKPPPPP  | -----PAAP    | -----SYTPTAP    | PSNAKLQ   | SGTAQP        | KLKKDIHRC |
| Ame_cbx6b        | PSSKPAPPPL | -----PAP     | -----TYTPTC     | PSNAKLQ   | SGAAQP        | KLKKDIHRC |
| Pna_LOC108413245 | PSSKPPPPPL | -----PTP     | -----SYPPSC     | PSNAKLQ   | SGAAQP        | KLKKDIHRC |
| Ipu_LOC108260787 | PSSKPPPPPP | -----PAS     | -----SYHPSG     | PSNAKLQ   | SGAAQP        | KLKKDIHRC |
| Eel_LOC113569862 | PSSKPPPPPP | -----PLSPP   | -----SYPPSG     | PSNAKLQ   | SGAAQP        | KLKKDIHRC |
| Srh_LOC107720374 | TTAKPPAS   | -----SSSAS   | -----SSSSFST    | APTFRVH   | SLAAAH        | KLKKDIHRC |
| San_LOC107667890 | TTAKPPAS   | -----SSSAS   | -----SSSSFST    | APTFRVH   | SLAAAH        | KLKKDIHRC |
| Cca_LOC109066300 | IPAKLPAS   | -----SSSASSA | --PSQ--PSSSSSL  | STPTFRVH  | SLAAAH        | KLKKDIHRC |
| Cau_LOC113065021 | ITAKLPSS   | -----SSSASSA | --PPQ--PSSSSSF  | STAPTFRVH | SLAAAH        | KLKKDIHRC |
| Sgr_LOC107602676 | TTAKPPAS   | -----SSSASAA | --PPP--PSSSSSYN | TAPTFRVH  | SLAAAH        | KLKKDIHRC |
| San_LOC107704552 | TTAKPPAS   | -----SSSASAA | --PPP--PSSSSSYN | TAPTFRVH  | SLAAAH        | KLKKDIHRC |
| Srh_LOC107717667 | TTAKPPAS   | -----SSSASAA | --PPQ--PSSSSSYN | TAPTFRVH  | SLAAAH        | KLKKDIHRC |
| Cca_LOC109066296 | TTAKPPAS   | -----SSASAAA | --PPQ--PSSSSSYN | TAPTFRVH  | SLAAAH        | KLKKDIHRC |
| Cau_LOC113039859 | TTAKPPAS   | -----STSASAA | --PPQ--PSLSSSYN | TAPTFRVH  | SLAAAH        | KLKKDIHRC |
| Dre_Cbx6a        | TTAKPPTA   | -----SSSASAA | --TPQ--PSSSSSH  | STAPTFRVH | SLAAAH        | KLKKDIHRC |
| Ame_LOC103038090 | SSSSSASS   | -----SSSAVPP | VNPNVRSSSSSSSL  | LAPTFRVH  | SLAASH        | KLKKDIHRC |
| Pna_Cbx6         | SSS        | -----SAAVTP  | --NPP--SSSSSAS  | LAPTFRVH  | SLAASH        | KLKKDIHRC |
| Eel_LOC113585732 | SSS        | -----SSVAP   | --ANPP--SSSSSSS | LAPTFRVH  | SLAASH        | KLKKDIHRC |
| Ipu_LOC108259424 | TSS        | -----SSVPVP  | --NPP--SSSSL    | LAPTFRVH  | SLAASH        | KLKKDIHRC |
| Dcl_LOC114786320 | SAATRPSS   | -----SSASSVL | APHT--STSSASSS  | LAPTAKLN  | SLAATH        | KLKKDIRRC |
| Cha_LOC105903838 | SSSRPPSSRP | PTSRPSSSTAL  | VSAP--ASSSSSSS  | PAPSKLN   | SLAATH        | KLKKDIRRC |
|                  | :          |              |                 | .....*    | * .....       | *****     |
| Prim.cons.       | 2HSKPPPPSP | PTSRPSSSASP  | AL2PP2RSPSSSSP  | ST        | APT2KL2SLAAQH | KLKKDIHRC |

|                  | 190        | 200         | 210           | 220        | 230        | 240                     |
|------------------|------------|-------------|---------------|------------|------------|-------------------------|
| Sgr_LOC107585029 | HRMARPLRP  | PD---QTVG   | PSPPFSSRP     | TVSPFSET   | VRILNRKVK  | PREVKKGRVILNLK          |
| San_LOC107662367 | HRMARPLRP  | PD---QTVG   | PSPPFSSRP     | TVSPFSET   | VRILNRKVK  | PREVKKGRVILNLK          |
| Srh_LOC107740604 | HRMARPLRP  | PD---QTVG   | PSPPFSSRP     | TVSPFSET   | VRILNRKVK  | PREVKKGRVILNLK          |
| Cau_LOC113046746 | HRMARPLRP  | PD---QTVG   | PSPPFSSRP     | TVSPFSET   | VRILNRKVK  | PREVKKGRVILNLK          |
| Cca_LOC109095357 | HRMARPLRP  | PD---QTVG   | PSPPFSSRP     | TVSPFSET   | VRILNRKVK  | PREVKKGRVILNLK          |
| Cau_LOC113047918 | HRMARPLRP  | PD---QTVG   | PSPPFSSRP     | TVSPFSET   | VRILNRKVK  | PREVKKGRVILNLK          |
| Sgr_LOC107602318 | HRMARPLRP  | PD---QTVG   | PSPPFSSRP     | TVSPFSET   | VRILNRKVK  | PREVKKGRVILNLK          |
| San_LOC107690738 | HRMARPLRP  | PD---QTVG   | PSPPFSSRP     | TVSPFSET   | VRILNRKVK  | PREVKKGRVILNLK          |
| Srh_LOC107710048 | HRMARPLRP  | PD---QTVG   | PSPPFSSRP     | TVSPFSET   | VRILNRKVK  | PREVKKGRVILNLK          |
| Dre_Cbx6b        | HRMARPLRP  | QD---HTVG   | PSPPFSSRP     | TVSAFSET   | VRILNRKVK  | PREVKKGRVILNLK          |
| Ame_cbx6b        | HRMSRRPLR  | SDPLSQSV    | GHS-----L     | SPFSET     | VRILNRKVK  | PREVKKGRVILNLK          |
| Pna_LOC108413245 | HRMSRRPLR  | PDPLAQSV    | GHS-----L     | SPFSET     | VRILNRKVK  | PREVKKGRVILNLK          |
| Ipu_LOC108260787 | HRMARPLRP  | PDPLAPPI    | GSSGPFSSRP    | TVSPFCET   | VRILNRKVK  | PREVKKGRVILNLK          |
| Eel_LOC113569862 | HRISRRPLR  | LDPLAQV     | GSSGPFSSRP    | TVSPFSET   | VRILNRKVK  | PREVKKGRVILNLK          |
| Srh_LOC107720374 | HRMSRRPLR  | PDPLGDPT    | GS--TSSSRPPI  | SPFSET     | VRILNRKVK  | PREVKKGRVILNLK          |
| San_LOC107667890 | HRMSRRPLR  | PDPLGDPT    | GS--TSSSRPPI  | SPFSET     | VRILNRKVK  | PREVKKGRVILNLK          |
| Cca_LOC109066300 | HRMSRRPLR  | PDPLGEPT    | GS--TSSSRPPI  | SPFSET     | VRILNRKVK  | PREVKKGRVILNLK          |
| Cau_LOC113065021 | HRMSRRPLR  | PDPLGEPT    | GS--TSSSRPPI  | SPFSET     | VRILNRKVK  | PREVKKGRVILNLK          |
| Sgr_LOC107602676 | HRMSRRPLR  | PDPLGDP     | MGT--TSLSRPPI | SPFSET     | VRILNRKVK  | PREVKKGRVILNLK          |
| San_LOC107704552 | HRMSRRPLR  | PDPLGDPT    | GT--TSSSRPPI  | SPFSET     | VRILNRKVK  | PREVKKGRVILNLK          |
| Srh_LOC107717667 | HRMSRRPLR  | PDPLGDPT    | GT--TSSSRPPI  | SPFSET     | VRILNRKVK  | PREVKKGRVILNLK          |
| Cca_LOC109066296 | HRMSRRPLR  | PDPLGNPR    | GS--TSSSRPPI  | SPFSET     | VRILNRKVK  | PREVKKGRVILNLK          |
| Cau_LOC113039859 | HRMSRRPLR  | PDPLGNPR    | GS--TSSSRPPI  | SPFSET     | VRILNRKVK  | PREVKKGRVILNLK          |
| Dre_Cbx6a        | HMMSSRRPLR | SDPLANST    | G---SSSRPPI   | SPFSET     | VRILNRKVK  | PREVKKGRVILNLK          |
| Ame_LOC103038090 | HRMSRRPLR  | PRY---DPDGS | --SFSRPPI     | SPFSET     | VRILNRKVK  | PREVKKGRVILNLK          |
| Pna_Cbx6         | HRMSRRPLR  | PDPLANPD    | GS--SFSRLPI   | SPFSET     | VRILNRKVK  | PREVKKGRVILNLK          |
| Eel_LOC113585732 | HRMSRRPLR  | PDPLANPD    | GS--SFSRLPI   | SPFSET     | VRILNRKVK  | PREVKKGRVILNLK          |
| Ipu_LOC108259424 | HRMSRRPLR  | PDPLANPD    | GS--SFSRLPI   | SPFSET     | VRILNRKVK  | PREVKKGRVILNLK          |
| Dcl_LOC114786320 | HRMSRRPLR  | PDVGP       | SNNT--SFSRPPI | SPFSET     | VRILNRKVK  | PREVKKGRVILNLK          |
| Cha_LOC105903838 | HRMSRRPLR  | PDPLAPSS    | GS-SFPSPRPV   | SPFSET     | VRILNRKVK  | PREVKKGRVILNLK          |
|                  | * ..:***** | .           | .             | * ..:***** | * ..:***** | * ..:*****              |
| Prim.cons.       | HRMSRRPLR  | PDPLGQ      | PVGS          | SSGPFSSRP  | 2SPFSET    | VRILNR2VKPREVKKGRVILNLK |

|                  | 250           | 260            | 270          | 280                | 290            | 300     |
|------------------|---------------|----------------|--------------|--------------------|----------------|---------|
| Sgr_LOC107585029 | -VVDKAGNGG    | VANSRRTHVP     | STQQSHFGRQK  | IPSRNRVIGK         | NRRFGEVSYRGIQ  | PTIRS   |
| San_LOC107662367 | -VVDKAGNG     | -GVANSRRTHMP   | STQQSHFGRQK  | IPSRNRVIGK         | NRRFGEVSYRGIQ  | PTIRS   |
| Srh_LOC107740604 | -VVDKAGNG     | -GVANSRRTHVP   | STQQSHFGRQK  | IPSRNRVIGK         | NRRFGEVSYRGIQ  | PTIRS   |
| Cau_LOC113046746 | -VVDKAGNG     | -AVANSRRTHVP   | STQQSHFGRQK  | IPSRNRVIGK         | NRRFGEVSYRGIQ  | PTIKS   |
| Cca_LOC109095357 | -VVDKAGNG     | -TVANSRRTHVP   | SAQQSHFGRQK  | IPSRNRVIGK         | NRRFGELSYRGIQ  | PTIRS   |
| Cau_LOC113047918 | -VVDKAGHG     | -GVPNRRTHVP    | SAQQSHFGRQK  | IPSRNRVIGK         | NRRFGEFSYRGIQ  | PTPNRN  |
| Sgr_LOC107602318 | -VVDKAGNG     | -GVANSRRTHVP   | SAQQSHFGRQK  | IPSRNRVIGK         | NRRFGELSYRGIQ  | PTIRS   |
| San_LOC107690738 | -VVDKAGNG     | -GVANSRRTHVP   | SAQQSHFGRQK  | IPSRNRVIGK         | NRRFGELSYRGIQ  | PTIRS   |
| Srh_LOC107710048 | -VVDKAGNG     | -GVANSRRTHVP   | SAQQSHFGRQK  | IPSRNRVIGK         | NRRFGELSYRGIQ  | PTIRS   |
| Dre_Cbx6b        | -VLDKAENT     | -AVANNKRTHVP   | STQQSHFGRQK  | IPSRNRVIGK         | NRRFGEVSYRGIQ  | PPIRG   |
| Ame_cbx6b        | -MIDKAGSG     | -GSANNKRTQS    | -TTHQSHTARQK | VPSRNRVIGK         | SRRFGEVSYRGLQL | PVSG    |
| Pna_LOC108413245 | -VIDKAGNS     | -GVANNRRTPS    | -TAHQSYIGRQK | VPSRNRVIGK         | SRRFGDVSYRGLPL | PVSG    |
| Ipu_LOC108260787 | -VMDKTG---    | -PANNKRTQN     | -SSHQSHLGRQK | VPSRNRVIGK         | SRRFGDVSFRC    | LQQPMGG |
| Eel_LOC113569862 | -VIDKPGGG     | -GVANNRRTPS    | -ATHQPHIGRQK | VPSRNRVIGK         | SRRFGDVSYRGLHL | PATA    |
| Srh_LOC107720374 | -VIDKSEN---   | -SGVTSRRSPQ    | -----        | SFAGRTKIPSRNRIIGK  | --KQGDMPYRPFQ  | HPMKM   |
| San_LOC107667890 | -VIDKSEN---   | -SGVTSRRSPQ    | -----        | SFAGRAKIPSRNRIIGK  | --KQGDMPYRPFQ  | HPMKM   |
| Cca_LOC109066300 | -VIDKSEN---   | -SGVTSRRSPQ    | -----        | SFAGRAKIPSRNRIIGK  | --KQGDMPYRPFQ  | HPMKM   |
| Cau_LOC113065021 | -VIDKSEN---   | -SGVTSRRSPQ    | -----        | SFAGRAKIPSRNRIIGK  | --KQGDMPYRPFQ  | HPMKM   |
| Sgr_LOC107602676 | -VIDKSQ-----  | -----          | -----        | IPSRNRIIGK         | --KHGDMPYRPFQ  | HPMKM   |
| San_LOC107704552 | -VIDKSQ-----  | -----          | -----        | IPSRNRIIGK         | --KHGDMPYRPFQ  | HPMKM   |
| Srh_LOC107717667 | -VIDKSQ-----  | -----          | -----        | IPSRNRIIGK         | --KHGDMPYRPFQ  | HPMKM   |
| Cca_LOC109066296 | -VIDKSEN---   | -SGVASRKTQ     | -----        | SFMGRAKIPSRNRIIGK  | --KHGDMPYRPFQ  | HPMKM   |
| Cau_LOC113039859 | -VIDKSEN---   | -SGVASRRTQ     | -----        | SFTGRAKIPSRNRIIGK  | --KHGDMPYRPFQ  | HPMKM   |
| Dre_Cbx6a        | -VIDKSEN---   | -GGMTSRRTPQ    | -----        | SFAGRAKIPSRNRIIGK  | --KHGDMPYRPFQ  | HPMKM   |
| Ame_LOC103038090 | -VIDKCG---    | -GRAANRGPTQ    | -----        | SHQGRAQIPSRNRIIGK  | --KQGDMPYRPFQ  | PPMKM   |
| Pna_Cbx6         | -VIDKYG---    | -GGATNRRPAQ    | -----        | TQQGRAQLPSRNRRIIGK | --KQGDMPYRPFQ  | PPMKM   |
| Eel_LOC113585732 | -VIDKYSGSGGGG | GATHRRPAQ      | -----        | SHQGRAQIPSRNRIIGK  | --RQGELPYRPFQ  | PPMKM   |
| Ipu_LOC108259424 | -VIDKYG-----  | -AGTTK         | -----        | GHQGRAHIPSRNRIIGK  | --RQGEMPYKPFQ  | PPMKM   |
| Dcl_LOC114786320 | -VIDKPGSGAG   | -TSSRKVPT      | -----        | SHLGRATIPSRNRIIGR  | --KCGNMPYRPFQ  | PPVKM   |
| Cha_LOC105903838 | SCMDKAGGGG    | -----PA        | -----AR      | --RAAIPSRNRIIGK    | --RFGDVPYRPFQ  | PPMKM   |
|                  | :**           |                |              | :**:*:*:*:         | :*:.:.:.:      | :       |
| Prim.cons.       | SVIDKA        | GNNGGVANSRRTPQ | STQQSHFGRQK  | IPSRNRVIGK         | NRRFGDMPYRPFQ  | PPMKM   |

|                  | 310         | 320             | 330                       | 340              | 350                 | 360   |
|------------------|-------------|-----------------|---------------------------|------------------|---------------------|-------|
| Sgr_LOC107585029 | SGFPVFGKLF  | DSHSLNNAENQ     | ---TQ---                  | SGESCNNTTNNLSSSQ | ---SSKV-DVSKVQ      | TTL   |
| San_LOC107662367 | SGFPVFGKLYD | SHSLSNAENQ      | ---TQ---                  | SGESRNNTTNNLSSSQ | ---NSKV-DVSKGQ      | TTL   |
| Srh_LOC107740604 | SGFPVFGKLF  | DSHSLSNAENQ     | ---TQ---                  | SGESRNNTTNNLSSSQ | ---SSKM-DVSKGQ      | TTL   |
| Cau_LOC113046746 | SGFPVFGKLF  | DSHSLSNAENQ     | ---TQ---                  | SGESRNNTTNNLASSQ | ---SSKA-DVSKGQ      | TTL   |
| Cca_LOC109095357 | SGFPVFGKLF  | DSHSLNNAENQ     | ---TQ---                  | SGESRNMTNTLSSSQ  | ---CSKL-DASKGQ      | TTL   |
| Cau_LOC113047918 | SGFPVFGKLF  | DSHSLNNAENQ     | ---TQ---                  | SGESRDNTAKNLSS   | -----               | KNQTL |
| Sgr_LOC107602318 | SGFPVFGKLF  | FESHSLNNAENQ    | ---TQ---                  | SGESRNNTTNNLSSSQ | ---SSKV-DASKGQ      | TTL   |
| San_LOC107690738 | SGFSVFGKLF  | DSHSLNNAENQ     | ---TQ---                  | SGESRNNTTNDLSSSQ | ---SSKV-DASKGQ      | TTL   |
| Srh_LOC107710048 | SGFPVFGKLF  | DSHSLNNAENQ     | ---TQ---                  | SGESRNNTTNNLSSSQ | ---SSKV-DASKGQ      | TTL   |
| Dre_Cbx6b        | SGFPVFGKLF  | DSHSLKNAE       | -----                     | SGESRNSMTNNLSSSQ | ---SSKLLDVSKGQ      | NRR   |
| Ame_cbx6b        | SGFSMGKTFN  | SHPMDSNGQPAVEH  | KESGQKSSSKGLSSQSSSQ       | ---SSKVATSDVPSAL |                     |       |
| Pna_LOC108413245 | AGFSVFGKA   | FEAHSMDSGQPKLEH | --SGHKPG-KSLSLQSLSQ       | ---SSKLMSTDVPKAL |                     |       |
| Ipu_LOC108260787 | AGFSVFRKPI  | EAYPMDPSEKPKAEQ | --SGHKPGTNPS--PSSSQ       | ---SSKVKNASVPEAL |                     |       |
| Eel_LOC113569862 | AGFPVFGKPF  | ECHPMEVSEKPKVEQ | --CVPKVACNSSSLPSSSQ       | ---SPKVMTPDIPKAL |                     |       |
| Srh_LOC107720374 | LGFPMYGGP   | FGHLPCGSMSSM    | -----                     | ANEESNSGANRRGGN  | RGKSCDSHSSANAQKF    |       |
| San_LOC107667890 | LGFPMYGGP   | FGHLPCGSMSSV    | -----                     | ANEESNTGANQRGGN  | ---CCDSHSSANAQKF    |       |
| Cca_LOC109066300 | LGFPMYGGP   | FGHLPCGSVSSM    | -----                     | ANEESNTGANRRGGN  | ---CCDSHSSANVQKF    |       |
| Cau_LOC113065021 | LGFPMYGGP   | FGHLPCGSMSSM    | -----                     | ANEESKTGANQRGGN  | ---CCDSHSSASTQKF    |       |
| Sgr_LOC107602676 | LGFPMYGGP   | FGHLNPGSMSSM    | -----                     | ANEESNTGVNRRGGG  | ---CCDSHSSANAQKF    |       |
| San_LOC107704552 | LGFPMYGGP   | FGHLNPGSMSSM    | -----                     | ANEESNTGVNRRGGG  | ---CCDSHSSANARKF    |       |
| Srh_LOC107717667 | LGLPMYGGP   | FGHLNPGSMSSM    | -----                     | ANEESNTGVNRRGGG  | ---CCDSHSSANAQKF    |       |
| Cca_LOC109066296 | LGFPMYGGP   | FGHLNPGSMSSM    | -----                     | ANDGSNTVVNRQGGG  | ---CCDSHSSANAQKF    |       |
| Cau_LOC113039859 | LGFPMYGGP   | FGHLNPGSMSSM    | -----                     | ANEESNTGVNRRGGG  | ---CCDSHSSASTQKF    |       |
| Dre_Cbx6a        | LGIPLYGGP   | FGHLNPGSGASSM   | -----                     | ANEESNTRASHGGGS  | ---RCGSQSSA--QRF    |       |
| Ame_LOC103038090 | LGFPMYGGP   | FGQLQPFPPVSAQ   | -----                     | PNRRAGSTSGTRGRGG | --GCGPGRPRKATKF     |       |
| Pna_Cbx6         | LGFPMYGGP   | FGQLQPCLPVSVQ   | -----                     | TSKRAGSTPVAKGRG  | -----PGRPSKP-KF     |       |
| Eel_LOC113585732 | PGFPMYGGP   | FGQLQPCPMVSVK   | -----                     | TSRSAGPTTSGKGAGR | --NCGPGHSSAE---     |       |
| Ipu_LOC108259424 | PGFPMYGGP   | FGQLQPCPPASAS   | -----                     | AGTRAGSAIGSKTRAH | --S--SADSSRV---     |       |
| Dcl_LOC114786320 | PGFPMYGGP   | FGQLQPMNPVFPQ   | -----                     | THIRFCNTNARGAHS  | TASATTGAPQALQ-      |       |
| Cha_LOC105903838 | TGFPMYGGP   | YGMQIRIGSDSFQ   | -----                     | ANAGMASNTEAS     | -IGGTSAPASASTPHAVP- |       |
|                  | *:.:.:      | :               |                           |                  |                     |       |
| Prim.cons.       | LGFPMYGGP   | FGHLPCGNASN     | QPKVTQKESANESSNNTTNNRGSSQ | TSSSKSHSSSKAQKL  |                     |       |

|                  | 370          | 380          | 390                       | 400                                | 410                        | 420 |
|------------------|--------------|--------------|---------------------------|------------------------------------|----------------------------|-----|
| Sgr_LOC107585029 | DELHP-SNS    | SSSEVSDG     | EPSPFPQT--                | QSQHSSSLPPKAS----                  | ATKAQDPALHK-----           |     |
| San_LOC107662367 | DELPP-SNS    | SSSEVSDG     | EPSPFPQT--                | QSQHSSSLPPKAS----                  | ATKAQDPALHK-----           |     |
| Srh_LOC107740604 | DELPP-SNS    | SSSEVSDG     | EPSPFPQT--                | QSQHSSSLPPKAS----                  | ATKAQDPALHK-----           |     |
| Cau_LOC113046746 | DELPP-SNS    | SSSEVSDG     | EPSPFPQT--                | QSQHSSSLPPKAS----                  | ATKAQDPALHK-----           |     |
| Cca_LOC109095357 | DELPP-SNS    | SSSEVSDG     | EPSPFPQT--                | QSQHSSSLQPKSS----                  | ATKAPDPTLHK-----           |     |
| Cau_LOC113047918 | DELPP-SNS    | SSSEVSDG     | EPSPFPQT--                | QSQRSSSLQPKSS----                  | TIKAPDPTLHK-----           |     |
| Sgr_LOC107602318 | DELPP-SNS    | SSSEVSDG     | EPSPFPQT--                | QSQHSSSLQPKSS----                  | ATKAPDPTLHK-----           |     |
| San_LOC107690738 | DELPP-SNS    | SSSEVSDG     | EPSPFPQT--                | QSQHSSSLQPKSS----                  | ATKAPDPTLHK-----           |     |
| Srh_LOC107710048 | DELPP-SNS    | SSSEVSDG     | EPSPFPQT--                | QSQHSSSLQPKSS----                  | ATKAPDPTLHK-----           |     |
| Dre_Cbx6b        | NEEPPPSNS    | SSSEVSDG     | EPSPFPQT--                | QSQHSSSLQPKASSTKSPSTKAPDPTLHK----- |                            |     |
| Ame_cbx6b        | NEPPPS-SAS   | SSSEVSDG     | ESHTSVAPT                 | KSHQPLSAHDHK----                   | SENNNCFKLPSLSLQHN          |     |
| Pna_LOC108413245 | SEAPP-SAS    | SSSEVSDG     | ESHLTSSA--                | QSHQPSLAHQ-----                    | SSKVNPAILPP--L---          |     |
| Ipu_LOC108260787 | VEPPR-SAS    | SSSEVSDG     | EPHPLPP--                 | QFHPN-QLPQ-----                    | SGEANSQISHA-----           |     |
| Eel_LOC113569862 | SEPPC-SPS    | SPFEVSE      | GELLFPPT--                | HPQPPPSAAQ-----                    | PCQANLAILPP-----           |     |
| Srh_LOC107720374 | QYQPPPSPS    | SSFSSEN      | NSSPS-LQKQ                | TQPEAPT-----                       | SPTKLDSAASSRS-----         |     |
| San_LOC107667890 | QYQPPPSPS    | SSFSSEN      | NSSPS-LQKQ                | TQPEAPT-----                       | SPTKLDSAASSRS-----         |     |
| Cca_LOC109066300 | QYQPPPSPS    | SSSGSN       | NSSPS-LQKQ                | TQPEAPT-----                       | SPTKLDSAGSSRS-----         |     |
| Cau_LOC113065021 | QYQHPPSPS    | SSSGSN       | NSSLS-LQKT                | QTLEAPM-----                       | SPTKLDSASSRS-----          |     |
| Sgr_LOC107602676 | QYQPPPSPS    | SSSGSN       | NSSPS-PQKQ                | TQPEAP-----                        | TKLDSAASSRS-----           |     |
| San_LOC107704552 | QYQPPPSPS    | SSSGSN       | NSSPS-PQEQT               | TQPEAP-----                        | AKLDSAASSRS-----           |     |
| Srh_LOC107717667 | QYQPPPSPS    | SSSGSN       | NSSPS-PQKQ                | TQPEAP-----                        | TKLDSAASSRS-----           |     |
| Cca_LOC109066296 | QYQPPPSPS    | SSSGS        | INITPS-LQKQ               | TQPEAP-----                        | TKLDSAASSRS-----           |     |
| Cau_LOC113039859 | QYQPPPSPS    | SSSGSN       | NSSPS-PQKQ                | TQPEAP-----                        | TKLDSAASTCS-----           |     |
| Dre_Cbx6a        | QYQPTPSPS    | SSSGSN       | SSSPS-TQKQ                | TQKEGPT-----                       | SSAKLTPTESSRS-----         |     |
| Ame_LOC103038090 | PYQSPPPSPS   | SSSGSE       | SDASSPPKI                 | QPGPPQASPS                         | ETAPSS--PPV-LSPETPSRGSEP-- |     |
| Pna_Cbx6         | PFQSPPPSPS   | SSSGSE       | SDAPSPPI                  | QPGPPQAPP-ETAPSS--                 | PPV-LSPETPSRCSGV--         |     |
| Eel_LOC113585732 | QFQSPPPSPS   | SSSGSE       | SDAPSLPQI                 | QATPPKAPP-DSAPSS--                 | PPV-LSPETPSRATDD--         |     |
| Ipu_LOC108259424 | RIQSPPPSPS   | SSSGTE       | SDAPSSRQI                 | HPRRKKAQLAAATSS--                  | PPLALSTETSSQA-----         |     |
| Dcl_LOC114786320 | HYQPPPSPS    | SSSGSE       | SQPPSPSI                  | QVSAPSAVA---GAPT--                 | STAKLRSQTQPQ-PGD--         |     |
| Cha_LOC105903838 | QYMSPPPSPS   | SSSGSD       | SRPPTPRQ                  | SKLAAPHPPP---RTRA--                | SPPKLRAPAAPQSGST--         |     |
| Prim.cons.       | QEQPPSPSSSSS | 2SDGEPSPFPQT | QPPSP2APLQPKASSSKSSPTKLDS | SPALSRSSGDHN                       |                            |     |

|                  | 430                    | 440                            | 450               | 460                 | 470  | 480 |
|------------------|------------------------|--------------------------------|-------------------|---------------------|------|-----|
| Sgr_LOC107585029 | -----LSAQPVASKN-----   | SSGPPSAVPS                     | SPMFSSSSSA---     | SSSEDNEHILD--       | LSVP |     |
| San_LOC107662367 | -----LSAQPVASKN-----   | SSGPPSALP                      | SPMFSSSSSA---     | SSSEDNEHILD--       | LSVP |     |
| Srh_LOC107740604 | -----LSAQPVASKN-----   | SSGPPSALP                      | SPMFSSSSSA---     | SSSEDNEHILD--       | LSVP |     |
| Cau_LOC113046746 | -----LSAQPAASKN-----   | SSGPPSALP                      | SPMFSSSSSA---     | SSSEDNEHILD--       | LSVP |     |
| Cca_LOC109095357 | -----LSGQTVPSKN-----   | SLAPSALP                       | SPMFSSSSSA---     | SSSEDNERILD--       | LSVP |     |
| Cau_LOC113047918 | -----HSAQTVPSKN-----   | SLVPTSLP                       | SPMFSSSSSA---     | SSSEDNERILD--       | LSVP |     |
| Sgr_LOC107602318 | -----LSAQPVPSKN-----   | SLGLSALP                       | SPMFSSSSSA---     | SSSEDSERILD--       | LSVP |     |
| San_LOC107690738 | -----LSAQPVPSKN-----   | SLGLSALP                       | SPMFSSSSSA---     | SSSEDSEIRILD--      | LSVP |     |
| Srh_LOC107710048 | -----LSAQPVPSKN-----   | SLGLSALP                       | SPMFSSSSSA---     | SSSEDSEIRILD--      | LSVP |     |
| Dre_Cbx6b        | -----LGTQPVASKNK-----  | DSASSALP                       | SPMFSSSSSA---     | STSEDNEHILD--       | LSVP |     |
| Ame_cbx6b        | LKDQKQSNQLKDS          | QPKKSNPSAAQ                    | SLLPSPMFSSSSSS--- | SSSEDNEHILD--       | LSVP |     |
| Pna_LOC108413245 | ---K-PSNQLTDLKP---     | NSSAAKSVLP                     | SPMFSSSSSS---     | SSSEDNEHILD--       | LSVP |     |
| Ipu_LOC108260787 | ---AKSSPQLTDSKA---     | KLT--QSAMP                     | SPMFSSSSSSSLSS--- | SSSENEHILD--        | LSVP |     |
| Eel_LOC113569862 | ---AKPNTQLTDCKP---     | NSTPAQSTLP                     | SPMFSSSSSS---     | SSSEDSEHILD--       | LSVP |     |
| Srh_LOC107720374 | ---RDASQPPPKSSS-----   | APFLLSP                        | SPSYSSSL-----     | SSLEDEDQGSPN-LATS   |      |     |
| San_LOC107667890 | ---RDASQPPPKSSS-----   | APFLLSP                        | SPSYSSSL-----     | SSLEDEDQGSPN-LATS   |      |     |
| Cca_LOC109066300 | ---QDASQPHPKSSS-----   | APFLLSP                        | SPSYLSSP-----     | SFSLDEDQGSPN-LTTS   |      |     |
| Cau_LOC113065021 | ---QDSSQPHPKSSS-----   | APFLLSP                        | SHSYSSSP-----     | SFSLDEDQGSPN-LTTS   |      |     |
| Sgr_LOC107602676 | ---RDASQPHPKSSS-----   | VPFLLSP                        | SPSYSSS-----      | SLGENQGSPN-LVTS     |      |     |
| San_LOC107704552 | ---QDASQPHPKSSS-----   | APFLLSP                        | SPSYSSS-----      | SLGENQGSPN-LVTS     |      |     |
| Srh_LOC107717667 | ---RDASQPHPKSSS-----   | APFLLSP                        | SPSYSSS-----      | SLGENQGSPN-LVTS     |      |     |
| Cca_LOC109066296 | ---RDASQPHPKSSS-----   | APFLLSP                        | SPSYSSSP-----     | SSLEDEDQGSPN-LTTS   |      |     |
| Cau_LOC113039859 | ---QDASQPHPKSSS-----   | APFLLSP                        | SPSYSTSP-----     | SSLEDEDQGSPN-LAIS   |      |     |
| Dre_Cbx6a        | ---HDTSQPHPKSSS-----   | TPFLLSP                        | SPSYSSSP-----     | SSSQEDEDLGLSK-SATS  |      |     |
| Ame_LOC103038090 | -PQNHHSSAKPGSASN-----  | PTSFLLP                        | SPSLSSSA-S-----   | SSSPDEDEEKAQ-----   |      |     |
| Pna_Cbx6         | -PQSRSSGAKPGSASS-----  | PTSFLLP                        | SPSLSS--S-----    | SSSPDEDEDERAQK-LPAP |      |     |
| Eel_LOC113585732 | -PQNCPPSSAQPGSVSD----- | PVFFLLP                        | SPSLSSSS-P-----   | SSSPEDDERARN-VPPA   |      |     |
| Ipu_LOC108259424 | --HNRSTCTKSGSS-----    | APRLP                          | SPPHSSSSSS--LSSSP | EDKKGRAQN-LPFV      |      |     |
| Dcl_LOC114786320 | -PQFQPGSTQASTAP-----   | VPFLLP                         | SPSLSSSQ-----     | SSSPFEDDEDEGRGLSTQ  |      |     |
| Cha_LOC105903838 | -SQHQPTAAQSAAVPE-----  | SAAFLP                         | CPSPSLSS-----     | SSSLEDEEGEDAANLSAS  |      |     |
| Prim.cons.       | LPQ2DLSQQPPKSKKSNSS2   | GASFLPSSPSFSSSSSSASSSSSSSEDEE2 | ILDN2LSVP         |                     |      |     |

|                  | 490                                                        | 500 | 510 | 520                       | 530         | 540        |
|------------------|------------------------------------------------------------|-----|-----|---------------------------|-------------|------------|
| Sgr_LOC107585029 | -HEMDRRLRRHHPFSG-----                                      |     |     | RHPLKVPEVPVSEEE----       | PSEEEEDFDW  |            |
| San_LOC107662367 | -HEMDRRLRRHHPFSG-----                                      |     |     | RHPLKVPEVPVSEEE----       | PSEEEEDLDW  |            |
| Srh_LOC107740604 | -HEMDRRLRRHHPFSG-----                                      |     |     | RHPLKVPEVPVSEEE----       | PSEEEEDLDW  |            |
| Cau_LOC113046746 | -HEMDRRLRRHHPFSG-----                                      |     |     | RHPLKVPEVPVSEEE----       | PSEEEEDLDW  |            |
| Cca_LOC109095357 | -HEMDRRLRRHHPFSG-----                                      |     |     | RHPLKVPEVPVSEEE----       | PSEEEEDLDW  |            |
| Cau_LOC113047918 | -HEMDKRLRRHHPFSG-----                                      |     |     | RHPLKVPEVPVSEEE----       | PSEEEEDLDW  |            |
| Sgr_LOC107602318 | -HEMDRRLRRHHPFSG-----                                      |     |     | RHPLKVPEVPVSEEE----       | PSEEEEDLDW  |            |
| San_LOC107690738 | -HEMDRRLRRHHPFSG-----                                      |     |     | RHPLKVPEVPVSEEE----       | PSEEEEDLDW  |            |
| Srh_LOC107710048 | -HEMDRRLRRHHPFSG-----                                      |     |     | RHPLKVPEVPVSEEE----       | PSEEEEDVDW  |            |
| Dre_Cbx6b        | -HEMDRRLRRHHPFSG-----                                      |     |     | RHPLKVPEVPVSEEE----       | PSEEEEDLDW  |            |
| Ame_cbx6b        | -HGSDRRGKRHYHFCR-----                                      |     |     | HRQPKLPEIPISEEE----       | ASEEEEE-LDW |            |
| Pna_LOC108413245 | -HGSDRRAKRHHHFCR-----                                      |     |     | HQQPKLPEIPMSEEE----       | ASEEEEEELDW |            |
| Ipu_LOC108260787 | -HGTDRRARQQRHFRG-----                                      |     |     | RRQPKVPEIPISEEE----       | ASEEDQDLDW  |            |
| Eel_LOC113569862 | -HSTERRCRRNSFGP-----                                       |     |     | RRPAEFPENPLPHK----        | VSEEDLDLDW  |            |
| Srh_LOC107720374 | -RGRKRKLRRHTQVGQ---AS-----                                 |     |     | VCQVSDRTTTPHPEEN---       | REPKEGDPDW  |            |
| San_LOC107667890 | -RGRKRKLRRHTQVGR---AS-----                                 |     |     | VCQVSDRTTTPHPEEN---       | REPKEGDPDW  |            |
| Cca_LOC109066300 | -RGRKRKLRRHTQVGR---AS-----                                 |     |     | LCQVSDRTTTPLPVET---       | REPKEGDPDW  |            |
| Cau_LOC113065021 | -RGRKRKLQHRHTQVGR---AS-----                                |     |     | VCQVSDCTTTPLEET---        | REPKEGNPDW  |            |
| Sgr_LOC107602676 | -QGGRKLRRHTQVGR---AS-----                                  |     |     | VCQVSDRNTAPLPEEN---       | RVPKEGDPDW  |            |
| San_LOC107704552 | -RGGRKLRRHTQVGR---AS-----                                  |     |     | VCQVSDRNTAPLPEEN---       | RVPKEGDPDW  |            |
| Srh_LOC107717667 | -RGGRKLRRHTQVGR---AS-----                                  |     |     | VCQVSDRNTAPLPEEN---       | RVPKEGDPDW  |            |
| Cca_LOC109066296 | -RGGRKLRRHTQVGR---AS-----                                  |     |     | VCQVSDRTTAPLPEEN---       | RVPKEGDPDW  |            |
| Cau_LOC113039859 | -RGGRKLRRHTQVGR---AS-----                                  |     |     | VCQVSDCTTTPLEEN---        | RVPKEGDPDW  |            |
| Dre_Cbx6a        | -RGRKQELRHQTQVGR---AS-----                                 |     |     | VCQVSNQTTASFPEKN---       | RVPKEGDPDW  |            |
| Ame_LOC103038090 | --GGKRKPCRIRAS-----                                        |     |     | EAATSHPAAEKRAERRALKKADPDW |             |            |
| Pna_Cbx6         | PKGGRKPCRFRAS-----                                         |     |     | EGANSRPTAEK----           | KALKRGNPDW  |            |
| Eel_LOC113585732 | PKDGKWKPRRRTRASV---S-----                                  |     |     | KSARQGDNSRPLAEK----       | SAPERGDPDW  |            |
| Ipu_LOC108259424 | ARGRKRKARRRFQTS-----                                       |     |     | NPSSGDGTEK----            | TAPKPGDPDW  |            |
| Dcl_LOC114786320 | SKGRRRGRHCHHHQSSDCHATLVIANASQPLTQAIDRNAYQPS                |     |     | TEQA---                   | RAPVEGDPDW  |            |
| Cha_LOC105903838 | QKVKRSLRRRSQAS----                                         |     |     | QP-TSASDNNTVSSPAEDATSAAL  | GET---      | RAPVEGDPDW |
|                  | :                                                          |     |     | :                         | :           | **         |
| Prim.cons.       | PHGM2RRLRRHQFS2DCHASL22A22222VRQP2KVPEVP2SEENAERRS2EEGDPDW |     |     |                           |             |            |

|                  | 550                                                         | 560 | 570 | 580                 | 590 | 600 |
|------------------|-------------------------------------------------------------|-----|-----|---------------------|-----|-----|
| Sgr_LOC107585029 | HPDMTSQCANVVVDITANLLTVTIK-EFCHPPS-----                      |     |     | ATPPPCYPKNISAQHDT   |     |     |
| San_LOC107662367 | RPDMTSQCANVVVDITANLLTVTIK-EFCHPPS-----                      |     |     | ATPPPCYPKNISAQHDT   |     |     |
| Srh_LOC107740604 | HPDMTSQCANVVVDITANLLTVTIK-EFCHPPS-----                      |     |     | ATPPPCYPKNISAQHDT   |     |     |
| Cau_LOC113046746 | HPDMTSRCANVVVDITANLLTVTIK-EFCHPPS-----                      |     |     | ATPPPCYPKNISQHDT    |     |     |
| Cca_LOC109095357 | HPDMTSQCANVVVDITANLLTVRSRSSVIHPPLPLL-----                   |     |     | PATPKIYQLKMTQNSQS   |     |     |
| Cau_LOC113047918 | RPDMTSKCANVVVDITANLLTVTIK-EFCHPPS-----                      |     |     | VNPPPCYPKNILAQHDT   |     |     |
| Sgr_LOC107602318 | HPDMTSQCANVVVDITANLLTVTIK-EFCHPPS-----                      |     |     | ATPPPCYPKNISAQHDT   |     |     |
| San_LOC107690738 | HPDMTSQCANVVVDITANLLTVTIK-EFCHPPS-----                      |     |     | ATPPPCYPKNISAQHDT   |     |     |
| Srh_LOC107710048 | HPDMTSQCANVVVDITANLLTVTIK-EFCHPPS-----                      |     |     | ATPPPCYPKNISAQHDT   |     |     |
| Dre_Cbx6b        | RPDMTSRCANVVVDITANLLTVTIK-EFCHPPS-----                      |     |     | ASSPFCYSKNVSTQNNT   |     |     |
| Ame_cbx6b        | HPDMAAQCANVVVDVTTNLLTVTIK-EFCHPHGLPP-----                   |     |     | SSSSPC-----         |     |     |
| Pna_LOC108413245 | HPDMAAQCANVVVDVTTNLLTVTIK-EFCHPHGLPP-----                   |     |     | SASSPCYANHFSASNKT   |     |     |
| Ipu_LOC108260787 | HPDMAAQCANVVIDVTTNLLTVTIK-EFCHPHGLPA-----                   |     |     | VASSPCCANNLPSKKKT   |     |     |
| Eel_LOC113569862 | RPDMAARCANVVVDVTTNLLTVTIK-EFCHPHGLPP-----                   |     |     | PVSSACFSNHLASANKT   |     |     |
| Srh_LOC107720374 | NPEMAPSCTNVVVVDVTTNLLTVTIK-EFCHSGA-GS-----                  |     |     | EPSSPCQADNPPCPTTA   |     |     |
| San_LOC107667890 | NPEMAPSCTNVVVVDVTTNLLTVTIK-EFCHSGA-GS-----                  |     |     | EPSSPCLADNPPCPTTA   |     |     |
| Cca_LOC109066300 | HPQMTSCTNVVVVDVTTNLLTVTIK-EFCHSGA-GS-----                   |     |     | ETSSPCQADNPPCPTTA   |     |     |
| Cau_LOC113065021 | HPEMTSCTNVVVVDVTTNLLTVTIK-EFCQSGA-GS-----                   |     |     | KPSSPCQADNPP-----   |     |     |
| Sgr_LOC107602676 | HPEMAPSSANVVVDVTTNLLTVTIK-EFCHSGA-GS-----                   |     |     | EPSSPCQADKPPCPTTV   |     |     |
| San_LOC107704552 | HPEMAPSCANVVVDVTTNLLTVTIK-EFCHSGA-GS-----                   |     |     | EPSSPCQADKPPCPTTA   |     |     |
| Srh_LOC107717667 | HPEMAPSCANVVVDVTTNLLTVTIK-EFCHSGA-GS-----                   |     |     | EPSSPCQADKPPCPTTA   |     |     |
| Cca_LOC109066296 | HPEMAPSCTNVVVVDVTTNLLTVTIK-EFCHSGA-GS-----                  |     |     | EPSSPCQADNPPCPTTA   |     |     |
| Cau_LOC113039859 | HPEMAPSCANVVVDVTTNLLTVTIK-EFCQSGA-GS-----                   |     |     | EPSSPCQADKPPCPTTA   |     |     |
| Dre_Cbx6a        | HPEMAPSSANVVVDVTTNLLTVTIK-EFCNSGA-GS-----                   |     |     | DPSSPCQADNPNSPTTT   |     |     |
| Ame_LOC103038090 | RPERSPGCINVVVDVATNHQTVTIK-EFCKPGA-GSKGSTGSSPPSPSQAKNPGSSAPA |     |     |                     |     |     |
| Pna_Cbx6         | RPERAPSCANVVVDVATNQLTVTIK-EFCKPGA-SS---                     |     |     | TDSTPPSPSQAKSPSFTLS |     |     |
| Eel_LOC113585732 | RPERAPSCANVVVDVATNHLTVTIK-EFCQPGA-GSAGSVASAPASPSHSENLTSTFTS |     |     |                     |     |     |
| Ipu_LOC108259424 | HPKRTPTCANVVVDVATNHLTVTIK-EFCQSGA-AS-----                   |     |     | GPSPSHSENAKSSTTT    |     |     |
| Dcl_LOC114786320 | RPDMAPCCANVVVDVTTNLLTVTIK-EFCQPTETGS-----                   |     |     | MPSPSPIN-STPPSVST   |     |     |
| Cha_LOC105903838 | RPDMAPRCANVVVDVTTNLLTVTIK-EFCQPAEAGS-----                   |     |     | GPSPSATSSSPPPPSQ    |     |     |
|                  | *****:                                                      |     |     | *****:              |     |     |
| Prim.cons.       | HPEMAPSCANVVVDVTTNLLTVTIKSEFCHP2ALGS2GST3SAPSSPC2AKNPPAPT   |     |     |                     |     |     |

|                  | 610                                         | 620   | 630   | 640   |
|------------------|---------------------------------------------|-------|-------|-------|
| Sgr_LOC107585029 | KQPKQHPNKT                                  | ----- | ----- | ----- |
| San_LOC107662367 | KQPKQHPNKT                                  | ----- | ----- | ----- |
| Srh_LOC107740604 | KQPKQHPNKT                                  | ----- | ----- | ----- |
| Cau_LOC113046746 | KQPKDHPNKA                                  | ----- | ----- | ----- |
| Cca_LOC109095357 | NTPTKHECRHRYALLQPSEGILEGLLVVCLQFQLPGAHVSLC  | ----- | ----- | ----- |
| Cau_LOC113047918 | KQPKQHPNKT                                  | ----- | ----- | ----- |
| Sgr_LOC107602318 | KQPKHHPNKT                                  | ----- | ----- | ----- |
| San_LOC107690738 | KQPKHHPNKT                                  | ----- | ----- | ----- |
| Srh_LOC107710048 | KQPKHHPKKT                                  | ----- | ----- | ----- |
| Dre_Cbx6b        | QQPKQNPKNKT                                 | ----- | ----- | ----- |
| Ame_cbx6b        | -----                                       | ----- | ----- | ----- |
| Pna_LOC108413245 | KQPQ                                        | ----- | ----- | ----- |
| Ipu_LOC108260787 | NP                                          | ----- | ----- | ----- |
| Eel_LOC113569862 | NTRP                                        | ----- | ----- | ----- |
| Srh_LOC107720374 | AS                                          | ----- | ----- | ----- |
| San_LOC107667890 | AS                                          | ----- | ----- | ----- |
| Cca_LOC109066300 | AS                                          | ----- | ----- | ----- |
| Cau_LOC113065021 | -----                                       | ----- | ----- | ----- |
| Sgr_LOC107602676 | AS                                          | ----- | ----- | ----- |
| San_LOC107704552 | AS                                          | ----- | ----- | ----- |
| Srh_LOC107717667 | AS                                          | ----- | ----- | ----- |
| Cca_LOC109066296 | AS                                          | ----- | ----- | ----- |
| Cau_LOC113039859 | AS                                          | ----- | ----- | ----- |
| Dre_Cbx6a        | AYK                                         | ----- | ----- | ----- |
| Ame_LOC103038090 | AT                                          | ----- | ----- | ----- |
| Pna_Cbx6         | GT                                          | ----- | ----- | ----- |
| Eel_LOC113585732 | SA                                          | ----- | ----- | ----- |
| Ipu_LOC108259424 | -----                                       | ----- | ----- | ----- |
| Dcl_LOC114786320 | TSVATESKP                                   | ----- | ----- | ----- |
| Cha_LOC105903838 | AELPSLPLPATSVAP                             | ----- | ----- | ----- |
| Prim.cons.       | A2PKQHPNKT222A22QPSEGILEGLLVVCLQFQLPGAHVSLC | ----- | ----- | ----- |

---

**Supplementary Figure S2. Sequence alignment for Cbx6 proteins** from Ostariophysi including zebrafish (Dre, *Danio rerio*), goldfish (Cau, *Carassius auratus*), common carp (Cca, *Cyprinus carpio*), three Chinese barbels (San, *Sinocyclocheilus anshuiensis*; Sgr, *Sinocyclocheilus grahami* and Srh, *Sinocyclocheilus rhinoceros*), cave fish (Ame, *Astyanax mexicanus*), red-bellied piranha (Pna, *Pygocentrus nattereri*), channel catfish (Ipu, *Ictalurus punctatus*), electric eel (Eel, *Electrophorus electricus*) and Clupeomorpha including denticle and atlantic herrings (Dcl, *Denticeps clupeoides*; Cha, *Clupea harengus*). The alignment was performed with the CLUSTALW multiple alignment tool. Sequences of the chromodomain are highlighted in bleu, of the ATHL motif in grey, of the Cx6.1 motif in light green, of the Cx6.2 motif in dark green and of the Pc-box in violet.
