# Supplementary material for: The Polycomb Orthologues in Teleost Fishes and Their Expression in the Zebrafish Model
Source: MDPI journal article supplement (doi:10.3390/genes11040362), 2020-03-27
Supplement: s1 [file s1]

**Supplementary Table S1: The teleost Pc orthologues**

|            |                                                         | CBX2                                                                                | CBX4                                                                                     | CBX6                                                                    | CBX7                                                                                           | CBX8                                                                        |
|------------|---------------------------------------------------------|-------------------------------------------------------------------------------------|------------------------------------------------------------------------------------------|-------------------------------------------------------------------------|------------------------------------------------------------------------------------------------|-----------------------------------------------------------------------------|
| <b>Dre</b> | Zebrafish ( <i>Danio rerio</i> )                        | cbx2 (Gene ID: 327291)                                                              | cbx4 (Gene ID: 573110)                                                                   | cbx6a (Gene ID: 799294)<br>cbx6b ( <a href="#">ENSDARG00000097543</a> ) | cbx7a (Gene ID: 550551)<br>cbx7b (Gene ID: 101882803)                                          | cbx8a (Gene ID: 100150672)<br>cbx8b (Gene ID: 799361)                       |
| <b>Cca</b> | Common carp ( <i>Cyprinus carpio</i> )                  | LOC109087174<br>LOC109046180                                                        | cbx4 (Gene ID: 109102575)<br>LOC109092326<br>LOC109075587*                               | LOC109066300<br>LOC109066296<br>LOC109095357<br>LOC109053813*           | LOC109100093<br>LOC109076671<br>LOC109061103                                                   | LOC109102576<br>LOC109092325<br>LOC109075586*                               |
| <b>Cau</b> | Goldfish ( <i>Carassius auratus</i> )                   | LOC113055003<br>LOC113067828<br>LOC113067392                                        | cbx4 (Gene ID: 113050689)<br>LOC113098321<br>LOC113052031<br>LOC113046661                | LOC113065021<br>LOC113039859<br>LOC113046746<br>LOC113047918            | LOC113047419<br>LOC113046823<br>LOC113111712<br>LOC113056054                                   | LOC113052035<br>LOC113046660<br>LOC113098307<br>LOC113050690                |
| <b>Sgr</b> | Golden-line barbel ( <i>Sinocyclocheilus grahami</i> )  | LOC107571836<br>LOC107601561*                                                       | cbx4 (Gene ID: 107591927)<br>LOC107553295<br>LOC107562304<br>LOC107559247                | LOC107602318<br>LOC107585029<br>LOC107602676<br>LOC107576933*           | LOC107584093<br>LOC107554058<br>LOC107602332                                                   | LOC107578989<br>LOC107559248<br>LOC107601979 / LOC107591932<br>LOC107553294 |
| <b>Srh</b> | 犀角金线鲃 ( <i>Sinocyclocheilus rhinoceros</i> )            | LOC107718939<br>LOC107710978                                                        | cbx4 (Gene ID: 107710281)<br>LOC107758118<br>LOC107736694*/LOC107728779*<br>LOC107710010 | LOC107720374<br>LOC107717667<br>LOC107710048<br>LOC107740604            | LOC107734182<br>LOC107709653<br>LOC107748788<br>LOC107723608                                   | LOC107758117<br>LOC107728583<br>LOC107710282<br>LOC107710028                |
| <b>San</b> | 安水金线鲃 ( <i>Sinocyclocheilus anshuiensis</i> )           | LOC107696361<br>LOC107695690                                                        | cbx4 (Gene ID: 107701204)<br>LOC107669529<br>LOC107690020<br>LOC107670662                | LOC107667890<br>LOC107704552<br>LOC107690738<br>LOC107662367            | LOC107695130<br>LOC107672137<br>LOC107692056<br>LOC107660863                                   | cbx8 (Gene ID: 107701205)<br>LOC107669528<br>LOC107670683<br>LOC107689994   |
| <b>Cva</b> | Sheepshead minnow ( <i>Cyprinodon variegatus</i> )      | LOC107089316<br>LOC107082907                                                        | cbx4 (Gene ID: 107085514)<br>LOC107092841                                                | cbx6 (Gene ID: 107090076)                                               | LOC107092875<br>LOC107093081                                                                   | LOC107092814<br>LOC107085518                                                |
| <b>Xma</b> | Platyfish ( <i>Xiphophorus maculatus</i> )              | LOC102229509<br>LOC102223386                                                        | cbx4 (Gene ID: 102230727)<br>LOC102232224                                                | cbx6 (Gene ID: 102234048)                                               | LOC102225821<br>LOC102232562                                                                   | cbx8 (Gene ID: 102230986)<br>LOC102227807                                   |
| <b>Pfo</b> | Amazon molly ( <i>Poecilia formosa</i> )                | LOC103146900<br>LOC103147077                                                        | cbx4 (Gene ID: 103133063)<br>LOC103141632                                                | cbx6 (Gene ID: 103154832)                                               | LOC103143382<br>LOC103153429                                                                   | LOC103133078<br>LOC103141633                                                |
| <b>Gaf</b> | Western mosquitofish ( <i>Gambusia affinis</i> )        | cbx2 ( <a href="#">ENSGAFG000000004995</a> )<br><a href="#">ENSGAFG000000015448</a> | cbx4 ( <a href="#">ENSGAFG000000020219</a> )<br><a href="#">ENSGAFG000000007827</a>      | <a href="#">ENSGAFG000000007822</a>                                     | cbx7a ( <a href="#">ENSGAFG000000010693</a> )<br>cbx7b ( <a href="#">ENSGAFG000000008146</a> ) | cbx8a ( <a href="#">ENSGAFG000000020216</a> )                               |
| <b>Pre</b> | Guppy ( <i>Poecilia reticulata</i> )                    | cbx2 (Gene ID: 103469046)<br>LOC103481889                                           | cbx4 (Gene ID: 103463659)<br>LOC103469229                                                | cbx6 (Gene ID: 108166384)                                               | LOC103482006<br>LOC103468464                                                                   | cbx8 (Gene ID: 103463651)<br>LOC103469230                                   |
| <b>Xco</b> | Monterrey platyfish ( <i>Xiphophorus couchianus</i> )   | LOC114160441<br>LOC114152221                                                        | cbx4 (Gene ID: 114145263)<br>LOC114160311                                                | cbx6 (Gene ID: 114145658)                                               | LOC114160060<br>LOC114151814                                                                   | cbx8 (Gene ID: 114145391)<br>LOC114160318                                   |
| <b>Pla</b> | Sailfin molly ( <i>Poecilia latipinna</i> )             | LOC106937812<br>LOC106943510                                                        | cbx4 (Gene ID: 106958633)<br>LOC106957183                                                | cbx6 (Gene ID: 106936647)                                               | LOC106961268<br>LOC106961608                                                                   | LOC106957191<br>LOC106958634                                                |
| <b>Pme</b> | Shortfin molly ( <i>Poecilia mexicana</i> )             | LOC106924748<br>LOC106914323                                                        | cbx4 (Gene ID: 106928181)<br>LOC106904416                                                | cbx6 (Gene ID: 106904597)                                               | LOC106910083<br>LOC106933457                                                                   | LOC106904421<br>LOC106928182                                                |
| <b>Nfu</b> | Turquoise killifish ( <i>Nothobranchius furzeri</i> )   | cbx2 (Gene ID: 107397219)<br>LOC107387235                                           | LOC107376532<br>LOC107395725                                                             | cbx6 (Gene ID: 107375179)                                               | LOC107388224<br>LOC107376332                                                                   | LOC107395726<br>LOC107376533                                                |
| <b>Fhe</b> | Mummichog ( <i>Fundulus heteroclitus</i> )              | cbx2 (Gene ID: 105932784)<br>LOC105937668                                           | cbx4 (Gene ID: 105940177)<br>LOC105933040                                                | cbx6a ( <a href="#">ENSFHEG000000010219</a> )                           | LOC105930863<br>LOC105917993                                                                   | cbx8 (Gene ID: 105940179)<br>LOC105933049                                   |
| <b>Kma</b> | Mangrove rivulus ( <i>Kryptolebias marmoratus</i> )     | cbx2 (Gene ID: 108237824)<br>LOC108249256                                           | cbx4 (Gene ID: 108245485)<br>LOC108239245                                                | cbx6 (Gene ID: 108231568)                                               | LOC108236253<br>LOC108250439                                                                   | LOC108228443<br>LOC108239259                                                |
| <b>Mze</b> | Zebra mbuna ( <i>Maylandia zebra</i> )                  | LOC101465599                                                                        | LOC101477503<br>LOC101467610                                                             | <a href="#">ENSMZEG000005006699</a>                                     | cbx7 (Gene ID: 101468311)<br>LOC101477848                                                      | cbx8 (Gene ID: 101477208)<br>LOC101467917                                   |
| <b>Oni</b> | Tilapia ( <i>Oreochromis niloticus</i> )                | cbx2 (Gene ID: 100704060)<br>LOC100695490                                           | cbx4 (Gene ID: 100712470)<br><a href="#">ENSONIG000000017179</a>                         | cbx6 (Gene ID: 102077022)                                               | cbx7 (Gene ID: 102076083)<br>LOC100700457                                                      | cbx8 (Gene ID: 100712202)<br><a href="#">ENSONIG000000017182</a>            |
| <b>Hbu</b> | Burton's mouthbrooder ( <i>Haplochromis burtoni</i> )   | LOC102307411<br>LOC102302910                                                        | cbx4 (Gene ID: 102295423)<br>LOC102309824                                                | cbx6 (Gene ID: 102311013)                                               | cbx7 (Gene ID: 102304092)<br>LOC102302921                                                      | cbx8 (Gene ID: 102295731)<br>LOC102309719* / LOC102309508                   |
| <b>Nbr</b> | Princess of Burundi ( <i>Neolamprologus brichardi</i> ) | LOC102797064<br>LOC102782953                                                        | LOC102794988<br>LOC102784839                                                             | LOC102784197                                                            | LOC102778087<br>LOC102783421                                                                   | LOC102790274<br>LOC102784560                                                |

|            |                                                          |                                                  |                                                                          |                                            |                                                          |                                                              |
|------------|----------------------------------------------------------|--------------------------------------------------|--------------------------------------------------------------------------|--------------------------------------------|----------------------------------------------------------|--------------------------------------------------------------|
| <b>Pny</b> | Makobe Island cichlid ( <i>Pundamilia nyererei</i> )     | cbx2 (Gene ID: 102192419)                        | LOC102215081<br>LOC102204981                                             | cbx6 (Gene ID: 102193150)                  | cbx7 (Gene ID: 102210279)<br>LOC102212884                | cbx8 (Gene ID: 102214806)<br>LOC102195395*                   |
| <b>Aca</b> | Eastern happy ( <i>Astatotilapia calliptera</i> )        | cbx2 (Gene ID:113020225)<br>LOC113027934         | LOC113023624<br>LOC113020834                                             | cbx6 (Gene ID:113024612)                   | LOC113027596<br>LOC113021152                             | cbx8 (Gene ID:113023623)<br>LOC113020844                     |
| <b>Aci</b> | Midas cichlid ( <i>Amphilophus citrinellus</i> )         | cbx2 (ENSACIG00000010758)<br>ENSACIG00000023237  | ENSACIG00000019976*<br>ENSACIG00000021421*                               | cbx6a (ENSACIG00000003935*)                | ENSACIG00000010051*<br>ENSACIG00000021398*               | cbx8a (ENSACIG00000021387)<br>ENSACIG00000019984*            |
| <b>Tru</b> | Japanese puffer ( <i>Takifugu rubripes</i> )             | LOC101075336<br>LOC101071244*                    | LOC101076082<br>LOC101075073                                             | cbx6 (Gene ID: 101072963)                  | LOC101070872<br>LOC101079131                             | cbx8 (Gene ID: 101076311)<br>LOC101068461                    |
| <b>Tni</b> | Tetraodon ( <i>Tetraodon nigroviridis</i> )              | cbx2 (ENSTNIG000000011276)<br>ENSTNIG00000003572 | cbx4 (ENSTNIG000000017994)<br>ENSTNIG00000004608                         | cbx6a (ENSTNIG00000018842)                 | cbx7a (ENSTNIG00000006270)<br>cbx7b (ENSTNIG00000012945) | Cbx8a (ENSTNIG00000017995)<br>ENSTNIG00000004609             |
| <b>Mmo</b> | Ocean sunfish ( <i>Mola mola</i> )                       | cbx2 (ENSMMOG00000020204*)<br>ENSMMOG00000009201 | ENSMMOG00000006960*<br>ENSMMOG00000007637*                               | cbx6a (ENSMMOG00000011204)                 | cbx7b (ENSMMOG00000003559)<br>ENSMMOG00000002654*        | cbx8a (ENSMMOG00000007636)                                   |
| <b>Lcr</b> | Large yellow croaker ( <i>Larimichthys crocea</i> )      | cbx2 (Gene ID: 104923389)<br>LOC104928297        | cbx4 (Gene ID: 104921555)<br>LOC104918816                                | cbx6 (Gene ID: 104925448)                  | LOC104932065<br>LOC104918881                             | cbx8 (Gene ID: 104921554)<br>LOC113747116                    |
| <b>Pfl</b> | Yellow perch ( <i>Perca flavescens</i> )                 | cbx2 (Gee ID: 114569523)<br>LOC114548436         | cbx4 (Gene ID: 114546081)<br>LOC114569420 <sup>£</sup>                   | cbx6 (Gene ID: 114569708)                  | cbx7 (Gene ID: 114548596)<br>LOC114570306                | cbx8 (Gene ID: 114569533)<br>LOC114569420 <sup>£</sup>       |
| <b>Sdu</b> | Greater amberjack ( <i>Seriola dumerili</i> )            | LOC111237087<br>LOC111217430                     | cbx4 (Gene ID: 111218007)<br>LOC111227040                                | cbx6 (Gene ID: 111216565)                  | cbx7 (Gene ID: 111219914)<br>LOC111230359                | cbx8 (Gene ID: 111217943)<br>LOC111227041                    |
| <b>Sla</b> | Yellowtail amberjack ( <i>Seriola lalandi dorsalis</i> ) | LOC111655533*<br>LOC111664318                    | LOC111667573<br>LOC111655477                                             | LOC111673425 <sup>5</sup>                  | LOC111646103<br>LOC111647569                             | cbx8 (Gene ID: 111655455)<br>LOC111667559                    |
| <b>Lbe</b> | Ballan wrasse ( <i>Labrus bergylta</i> )                 | LOC114919638<br>LOC109989300*                    | LOC109999250<br>LOC109985836                                             | cbx6 (Gene ID: 109991257)                  | cbx7 (Gene ID: 109992249)<br>LOC110004121                | cbx8 (Gene ID: 109992444)<br>LOC109985837                    |
| <b>Cgo</b> | Channel bull blenny ( <i>Cottoperca gobio</i> )          | LOC115005214<br>LOC115012765                     | cbx4 (Gene ID: 115013642)<br>LOC115012777                                | cbx6 (Gene ID: 115005610*)                 | LOC115012745<br>LOC115024515                             | cbx8 (Gene ID: 115013830)<br>LOC115012434                    |
| <b>Ena</b> | Live sharksucker ( <i>Echeneis naucrates</i> )           | cbx2 (Gene ID: 115047492)<br>LOC115059891        | LOC115047550<br>LOC115044326                                             | cbx6 (Gene ID: 115044595)                  | cbx7 (Gene ID: 115060227)<br>LOC115047474                | LOC115045432<br>LOC115047560                                 |
| <b>Pra</b> | Indian glassy fish ( <i>Parambassis ranga</i> )          | cbx2 (Gene ID: 11444058)<br>LOC114452074         | cbx4 (Gene ID: 114436730)<br>LOC114439615                                | cbx6 (Gene ID: 114439322)                  | LOC114437794<br>LOC114439674                             | cbx8 (Gene ID: 114436737)<br>LOC114439616                    |
| <b>Lca</b> | Barramundi perch ( <i>Lates calcarifer</i> )             | LOC108874733<br>LOC108874388                     | cbx4 (Gene ID: 108884566)<br>LOC108879647                                | cbx6 (Gene ID: 108887174)                  | LOC108877652<br>LOC108889108                             | Cbx8 (Gene ID: 108884564)<br>LOC108879657                    |
| <b>Spa</b> | Bicolor damselfish ( <i>Stegastes partitus</i> )         | cbx2 (Gene ID: 103356360)<br>LOC103370168        | cbx4 (Gene ID: 103372324)<br>LOC103361728                                | cbx6 (Gene ID: 103368006)                  | cbx7 (Gene ID: 103376032)<br>LOC103373459                | cbx8 (Gene ID: 103372326)<br>LOC103361729                    |
| <b>Apo</b> | Spiny chromis ( <i>Acanthochromis polyacanthus</i> )     | LOC110965974<br>LOC110948480                     | cbx4 (Gene ID: 110963665)<br>LOC110961503                                | cbx6a (ENSAPOG00000013333)                 | LOC110954475<br>LOC110969764                             | LOC110961504<br>LOC110963666 / LOC110953509                  |
| <b>Aoc</b> | Clown anemonefish ( <i>Amphiprion ocellaris</i> )        | LOC111568440<br>LOC111562895                     | LOC111577364<br>LOC111577320                                             | cbx6a (ENSAOCG00000009696)                 | cbx7 (Gene ID: 111574404)<br>LOC111570338                | LOC111577361<br>LOC111577322                                 |
| <b>Ape</b> | Orange clownfish ( <i>Amphiprion percula</i> )           | cbx2 (ENSAPEG00000019197)<br>ENSAPEG00000010635  | cbx4 (ENSAPEG00000011118*)<br>ENSAPEG00000015378<br>ENSAPEG000000011123* | cbx6a (ENSAPEG00000009256)                 | cbx7a (ENSAPEG00000011936)<br>cbx7b (ENSAPEG00000020659) | cbx8a (ENSAPEG00000011079)<br>ENSAPEG00000015391             |
| <b>Nco</b> | Black rockcod ( <i>Notothenia coriiceps</i> )            | cbx2 (Gene ID: 104943133)*<br>LOC104963701       | cbx4 (Gene ID: 104965337) <sup>£</sup><br>LOC104943130*                  | LOC104966035*                              | LOC104968319*<br>LOC104958407*                           | Gene ID: 104965337 <sup>£</sup><br>cbx8 (Gene ID: 104943131) |
| <b>Cse</b> | Tongue sole ( <i>Cynoglossus semilaevis</i> )            | LOC103382231<br>LOC103392533                     | LOC103384237<br>LOC103393067                                             | cbx6 (Gene ID: 103383217)                  | LOC103382143<br>LOC103393332                             | LOC103384236<br>LOC103393068                                 |
| <b>Sma</b> | Turbot ( <i>Scophthalmus maximus</i> )                   | cbx2 (ENSSMAG00000012696)                        | cbx4 (ENSSMAG00000014969)<br>ENSSMAG00000011638                          | cbx6a (ENSSMAG00000021207*)                | cbx7a (ENSSMAG00000006170)<br>cbx7b (ENSSMAG00000006575) | cbx8a (ENSSMAG00000014960)<br>ENSSMAG00000011628             |
| <b>Ame</b> | Mexican cavefish ( <i>Astyanax mexicanus</i> )           | cbx2 (Gene ID: 103045429)                        | cbx4 (Gene ID: 103045489)<br>LOC103031044<br>LOC111194212                | LOC103038090<br>cbx6b (ENSAMXG00000031801) | cbx7 (Gene ID: 103045301)<br>LOC103030095                | LOC103044980<br>LOC103029671                                 |
| <b>Pna</b> | Red-bellied piranha ( <i>Pygocentrus nattereri</i> )     | cbx2 (Gene ID: 108433500)                        | cbx4 (Gene ID: 108424718)<br>LOC108432204<br>LOC108410419                | cbx6 (Gene ID: 108436630)<br>LOC108413245  | cbx7 (Gene ID: 108413508)<br>LOC108441212                | cbx8 (Gene ID: 108424812)<br>LOC108432169                    |
| <b>Mar</b> | Zig-zag eel ( <i>Mastacembelus armatus</i> )             | LOC113135962<br>LOC113141452                     | cbx4 (Gene ID: 113128646)<br>LOC113141280                                | cbx6 (Gene ID: 113127975)                  | LOC113135651<br>LOC113141587                             | LOC113141197<br>LOC113128878                                 |

|            |                                                       |                                                                                    |                                                                                    |                                                                              |                                                              |                                                                                                             |
|------------|-------------------------------------------------------|------------------------------------------------------------------------------------|------------------------------------------------------------------------------------|------------------------------------------------------------------------------|--------------------------------------------------------------|-------------------------------------------------------------------------------------------------------------|
| <b>Mal</b> | Swamp eel ( <i>Monopterus albus</i> )                 | LOC109962840<br>LOC109969680                                                       | cbx4 (Gene ID: 109957911)<br>LOC109969469                                          | cbx6 (Gene ID: 109951608)                                                    | LOC109952690<br>LOC109952654                                 | cbx8 (Gene ID: 109958030)<br>LOC109969470                                                                   |
| <b>Ate</b> | Climbing perch ( <i>Anabas testudineus</i> )          | LOC113156830<br>LOC113158311                                                       | cbx4 (Gene ID: 113162586)<br>LOC113155158                                          | cbx6a ( <a href="#">ENSATEG00000003501</a> )                                 | cbx7 (Gene ID: 113155821)<br>LOC113152693                    | cbx8 (Gene ID: 113162656)<br>LOC113155165                                                                   |
| <b>Bsp</b> | Siamese fighting fish ( <i>Betta splendens</i> )      | LOC114845447<br>LOC114861130                                                       | cbx4 (Gene ID: 114846950)<br>LOC114860475                                          | cbx6 (Gene ID: 114870514)                                                    | LOC114846206<br>LOC114860262                                 | LOC114860488<br>LOC114847134                                                                                |
| <b>Gwi</b> | Blunt-snouted clingfish ( <i>Gouania willdenowi</i> ) | LOC114481946<br>LOC114468341*                                                      | LOC114469338<br>LOC114468810                                                       | cbx6 (Gene ID: 114466377)<br>LOC114459779                                    | LOC114467897<br>LOC114481622                                 | cbx8 (Gene ID: 114471454)<br>LOC114468472                                                                   |
| <b>Pma</b> | <i>Periophthalmus magnuspinnatus</i>                  | <a href="#">ENSPMGG00000018267*</a><br><a href="#">ENSPMGG00000007479</a>          | cbx4 ( <a href="#">ENSPMGG00000020462</a> )<br><a href="#">ENSPMGG00000010294*</a> | cbx6a ( <a href="#">ENSPMGG00000019149</a> )                                 | <a href="#">ENSPMGG00000017778*</a>                          | <a href="#">ENSPMGG00000010296*</a>                                                                         |
| <b>Sfa</b> | Jewelled blenny ( <i>Salarias fasciatus</i> )         | LOC115392810<br>LOC115385554<br>LOC115385547                                       | cbx4 (Gene ID: 115390982)<br>LOC115386984                                          | cbx6 (Gene ID: 115389716)                                                    | LOC115387617<br>LOC115392998                                 | cbx8 (Gene ID: 115390143)<br>LOC115386985                                                                   |
| <b>Ola</b> | Medaka ( <i>Oryzias latipes</i> )                     | cbx2 (Gene ID: 100125497)<br>LOC101172611                                          | cbx4 (Gene ID: 101158167)<br>LOC101160166                                          | cbx6a ( <a href="#">ENSORLGG00000025101</a> )                                | LOC101163772<br>LOC101168624                                 | cbx8 (Gene ID: 101157915)<br>LOC101160413                                                                   |
| <b>Gac</b> | Stickleback ( <i>Gasterosteus aculeatus</i> )         | cbx2 ( <a href="#">ENSGACG00000014410</a> )<br><a href="#">ENSGACG00000010130</a>  | cbx4 ( <a href="#">ENSGACG00000011731</a> )<br><a href="#">ENSGACG00000018219</a>  | cbx6a ( <a href="#">ENSGACG00000019854</a> ) <sup>§</sup>                    | cbx7a ( <a href="#">ENSGACG00000007724</a> )                 | cbx8a ( <a href="#">ENSGACG00000011737</a> )<br><a href="#">ENSGACG00000018216</a>                          |
| <b>Hco</b> | Tiger tail seahorse ( <i>Hippocampus comes</i> )      | cbx2 (Gene ID: 109527817)<br>LOC109518595                                          | LOC109527525<br>LOC109522747                                                       | cbx6 (Gene ID: 109511478)                                                    | cbx7 (Gene ID: 109512097)<br>LOC109527051                    | LOC109522748<br>LOC109527520                                                                                |
| <b>Pki</b> | Elephantfish ( <i>Paramormyrops kingsleyae</i> )      | LOC111855945                                                                       | cbx4 (Gene ID: 111833586)<br>LOC111843199                                          | LOC111845190<br>cbx6b ( <a href="#">ENSPKIG00000001275</a> )                 | cbx7 (Gene ID: 111845235)<br>LOC111846417                    | cbx8 (Gene ID: 111833462)<br>LOC111843316                                                                   |
| <b>Sfo</b> | Asian bonytongue ( <i>Scleropages formosus</i> )      | LOC114909229*<br>LOC108932946                                                      | cbx4 (Gene ID: 108939836)<br>LOC108937346                                          | CBX6 ( <a href="#">ENSSF0G00015032962</a> )<br>LOC108938841                  | cbx7 (Gene ID: 108939814)                                    | cbx8 (Gene ID: 108939914)<br>LOC108936948                                                                   |
| <b>Gmo</b> | Cod ( <i>Gadus morhua</i> )                           | cbx2 ( <a href="#">ENSGMOG00000013005</a> )<br><a href="#">ENSGMOG00000008628*</a> | cbx4 ( <a href="#">ENSGMOG00000011295</a> )<br><a href="#">ENSGMOG00000003065</a>  | <a href="#">ENSGMOG00000009785*<sup>§</sup></a>                              | cbx7b ( <a href="#">ENSGMOG00000013491</a> )                 | cbx8a ( <a href="#">ENSGMOG00000011305</a> )<br><a href="#">ENSGMOG00000013071</a>                          |
| <b>lpu</b> | Channel catfish ( <i>Ictalurus punctatus</i> )        | cbx2 (Gene ID: 108272989)                                                          | cbx4 (Gene ID: 108273333)<br>LOC108260285                                          | LOC108260787<br>LOC108259424                                                 | LOC108273000<br>LOC108273945                                 | cbx8 (Gene ID: 108272375)<br>LOC108261002                                                                   |
| <b>Eel</b> | Electric eel ( <i>Electrophorus electricus</i> )      | LOC113568410                                                                       | LOC113578871<br>LOC113573270                                                       | LOC113569862<br>LOC113585732                                                 | LOC113574891<br>LOC113588928                                 | cbx8 (Gene ID: 113578829)<br>LOC113573271                                                                   |
| <b>Cha</b> | Atlantic herring ( <i>Clupea harengus</i> )           | cbx2 (Gene ID: 105898869)                                                          | cbx4 (Gene ID: 105892293)<br>LOC105891371                                          | cbx6 (Gene ID: 105912870)*<br>LOC105903838                                   | LOC105888811<br>LOC105897974                                 | cbx8 (Gene ID: 105892295)<br>LOC116220815                                                                   |
| <b>Dcl</b> | Denticle herring ( <i>Denticeps clupeoides</i> )      | cbx2 (Gene ID: 114794490)                                                          | cbx4 (Gene ID: 114786797)<br>LOC114793848 <sup>£</sup>                             | LOC114786320                                                                 | cbx7 (Gene ID: 114795196)<br>LOC114793357                    | cbx8 (Gene ID: 114786798)<br>LOC114793848 <sup>£</sup>                                                      |
| <b>Elu</b> | Northern pike ( <i>Esox lucius</i> )                  | cbx2 (Gene ID: 105022926)<br>LOC105027558                                          | cbx4 (Gene ID: 105021558)<br>LOC105013028                                          | <a href="#">ENSELUG00000020955</a>                                           | cbx7 (Gene ID: 105025077)<br>LOC105025793 /LOC114834378*     | cbx8 (Gene ID: 105021557)<br>LOC105013027                                                                   |
| <b>Ssa</b> | Atlantic salmon ( <i>Salmo salar</i> )                | LOC106612095<br>LOC106586561*<br>LOC106606958<br>LOC106606946<br>LOC106589865      | LOC106606687<br>LOC106588430<br>LOC106564893                                       | cbx6 (Gene ID: 106591466)<br>LOC106564427*<br>LOC106595625*<br>LOC106604985* | LOC106608943<br>LOC106589529<br>LOC106607170<br>LOC106601246 | cbx8 (Gene ID: 106588425)<br>LOC106564894<br>LOC106606673<br>LOC106601767*<br>LOC106596252*                 |
| <b>Omy</b> | Rainbow trout ( <i>Oncorhynchus mykiss</i> )          | LOC110538562<br>LOC110486592<br>LOC110502771<br>LOC110499438                       | cbx4 (Gene ID: 110485970)<br>LOC110493691<br>LOC110486813<br>LOC110486808          | cbx6 (Gene ID: 110485591)<br>LOC110536509* <sup>§</sup>                      | LOC110538378<br>LOC110486408<br>LOC110499099<br>LOC110502860 | cbx8 (Gene ID: 110485969)<br>LOC110519423<br>LOC110493689<br>LOC110486816<br>LOC110486815*<br>LOC110486809* |
| <b>Oki</b> | Coho salmon ( <i>Oncorhynchus kisutch</i> )           | LOC109898685<br>LOC109879638<br>LOC109870514<br>LOC109899149                       | cbx4 (Gene ID: 109865985)<br>LOC109894654<br>LOC109887742<br>LOC109882827          | cbx6 (Gene ID: 109884207)                                                    | cbx7 (Gene ID: 109899160)<br>LOC109898530<br>LOC109870400    | LOC109889501<br>LOC109882830<br>LOC109882828*<br>LOC109866077                                               |
| <b>Sal</b> | Arctic char ( <i>Salvelinus alpinus</i> )             | LOC111977406<br>LOC112077672<br>LOC112073971<br>LOC112070653                       | LOC111956774<br>LOC111953935<br>LOC111950939*<br>LOC112069120                      | cbx6 (GeneID: 112069553)                                                     | LOC111977976<br>LOC111967894<br>LOC112075019<br>LOC112071830 | LOC111956622<br>LOC111954549                                                                                |

|     |                               |                                                                                             |                                                                                             |                                                         |                                                                                              |                                                                                |
|-----|-------------------------------|---------------------------------------------------------------------------------------------|---------------------------------------------------------------------------------------------|---------------------------------------------------------|----------------------------------------------------------------------------------------------|--------------------------------------------------------------------------------|
| Hhu | Huchen ( <i>Hucho hucho</i> ) | cbx2 (ENSHHUG00000026817)<br>ENSHHUG00000050943<br>ENSHHUG00000045610<br>ENSHHUG00000028893 | cbx4 (ENSHHUG00000045583)<br>ENSHHUG00000007216<br>ENSHHUG00000045521<br>ENSHHUG00000050487 | cbx6 (ENSHHUG00000007276)<br>cbx6a (ENSHHUG00000051753) | ENSHHUG00000038356<br>ENSHHUG00000052693<br>cbx7b (ENSHHUG00000042715)<br>ENSHHUG00000046898 | cbx8a (ENSHHUG00000045580)<br>ENSHHUG00000007201<br>cbx8b (ENSHHUG00000050484) |
|-----|-------------------------------|---------------------------------------------------------------------------------------------|---------------------------------------------------------------------------------------------|---------------------------------------------------------|----------------------------------------------------------------------------------------------|--------------------------------------------------------------------------------|

NCBI gene symbols in black or Ensembl entries in blue are indicated for 689 genes coding for Pc orthologues identified in 68 teleost species

- <sup>o</sup> indicates a pseudogene
- <sup>\*</sup> indicates that gene predictions generate an incomplete cDNA (coding for a protein lacking the entire or part of the chromodomain or the Pc box)
- <sup>£</sup> indicates that gene predictions generate a cbx4-cbx8 fusion gene
- <sup>§</sup> indicates that gene predictions generate a fusion gene between cbx6-like and nptxr-like neighboring genes
