# Supplementary material for: The Polycomb Orthologues in Teleost Fishes and Their Expression in the Zebrafish Model
Source: MDPI journal article supplement (doi:10.3390/genes11040362), 2020-03-27
Supplement: s1 [file s1]

**Supplementary Table S2: The teleost *cbx3* genes**

|            |                                                          | CBX3                                                                                     |
|------------|----------------------------------------------------------|------------------------------------------------------------------------------------------|
| <b>Dre</b> | Zebrafish ( <i>Danio rerio</i> )                         | cbx3a (Gene ID: 751689)<br>cbx3b (Gene ID: 567497)                                       |
| <b>Cca</b> | Common carp ( <i>Cyprinus carpio</i> )                   | LOC109108755<br>LOC109110995<br>LOC109072345*<br>LOC109111778<br>LOC109049867            |
| <b>Cau</b> | Goldfish ( <i>Carassius auratus</i> )                    | LOC113116259<br>LOC113060165<br>LOC113120071<br>LOC113062284                             |
| <b>Sgr</b> | Golden-line barbel ( <i>Sinocyclocheilus grahami</i> )   | LOC107602402<br>LOC107550827<br>LOC107596654<br>LOC107592008                             |
| <b>Srh</b> | 犀角金线鲃 ( <i>Sinocyclocheilus rhinoceros</i> )             | LOC107744695<br>LOC107710359<br>LOC107748667<br>LOC107743152                             |
| <b>San</b> | 安水金线鲃 ( <i>Sinocyclocheilus anshuiensis</i> )            | LOC107688340<br>LOC107684532<br>LOC107685582<br>LOC107656668                             |
| <b>Cva</b> | Sheepshead minnow ( <i>Cyprinodon variegatus</i> )       | LOC107101725<br>LOC107084325                                                             |
| <b>Xma</b> | Platyfish ( <i>Xiphophorus maculatus</i> )               | LOC106699776<br>LOC102224488                                                             |
| <b>Pfo</b> | Amazon molly ( <i>Poecilia formosa</i> )                 | LOC103145272<br>LOC103150371                                                             |
| <b>Gaf</b> | Western mosquitofish ( <i>Gambusia affinis</i> )         | <a href="#">cbx3a (ENSGAFG00000017896)</a><br><a href="#">cbx3b (ENSGAFG00000005602)</a> |
| <b>Pre</b> | Guppy ( <i>Poecilia reticulata</i> )                     | LOC103472202<br>LOC103478581                                                             |
| <b>Xco</b> | Monterrey platyfish ( <i>Xiphophorus couchianus</i> )    | LOC114141930<br>LOC114156510                                                             |
| <b>Pla</b> | Sailfin molly ( <i>Poecilia latipinna</i> )              | LOC106945372<br>LOC106950175                                                             |
| <b>Pme</b> | Shortfin molly ( <i>Poecilia mexicana</i> )              | LOC106923566<br>LOC106928233                                                             |
| <b>Nfu</b> | Turquoise killifish ( <i>Nothobranchius furzeri</i> )    | cbx3 (Gene ID: 107383357)<br>LOC107395330                                                |
| <b>Fhe</b> | Mummichog ( <i>Fundulus heteroclitus</i> )               | LOC105926367<br>LOC105934310                                                             |
| <b>Kma</b> | Mangrove rivulus ( <i>Kryptolebias marmoratus</i> )      | cbx3 (Gene ID: 108238543)<br>LOC108241914                                                |
| <b>Mze</b> | Zebra mbuna ( <i>Maylandia zebra</i> )                   | cbx3 (Gene ID: 101470889)<br>LOC101483327                                                |
| <b>Oni</b> | Tilapia ( <i>Oreochromis niloticus</i> )                 | LOC100694541<br>LOC100694248                                                             |
| <b>Hbu</b> | Burton's mouthbrooder ( <i>Haplochromis burtoni</i> )    | cbx3 (Gene ID: 102307347)<br>LOC102308912                                                |
| <b>Nbr</b> | Princess of Burundi ( <i>Neolamprologus brichardi</i> )  | LOC102791258<br>LOC102789869                                                             |
| <b>Pny</b> | Makobe Island cichlid ( <i>Pundamilia nyererei</i> )     | cbx3 (Gene ID: 102213635)<br>LOC102197024                                                |
| <b>Aca</b> | Eastern happy ( <i>Astatotilapia calliptera</i> )        | LOC113032446<br>LOC113014873<br>LOC113014635*                                            |
| <b>Aci</b> | Midas cichlid ( <i>Amphilophus citrinellus</i> )         | <a href="#">cbx3a (ENSACIG00000002111)</a><br><a href="#">cbx3b (ENSACIG00000016058)</a> |
| <b>Tru</b> | Japanese puffer ( <i>Takifugu rubripes</i> )             | LOC101067559<br>LOC101061787                                                             |
| <b>Tni</b> | Tetraodon ( <i>Tetraodon nigroviridis</i> )              | <a href="#">ENSTNIG00000001200</a><br><a href="#">ENSTNIG00000018425</a>                 |
| <b>Mmo</b> | Ocean sunfish ( <i>Mola mola</i> )                       | <a href="#">cbx3a (ENSMMOG00000000435)</a><br><a href="#">cbx3b (ENSMMOG00000001662)</a> |
| <b>Lcr</b> | Large yellow croaker ( <i>Larimichthys crocea</i> )      | LOC104940580<br>LOC104927770                                                             |
| <b>Pfl</b> | Yellow perch ( <i>Perca flavescens</i> )                 | cbx3 (Gene ID: 114567991)<br>LOC114557836                                                |
| <b>Sdu</b> | Greater amberjack ( <i>Seriola dumerili</i> )            | LOC111223223<br>LOC111238784                                                             |
| <b>Sla</b> | Yellowtail amberjack ( <i>Seriola lalandi dorsalis</i> ) | LOC111673325<br>LOC111652798                                                             |
| <b>Lbe</b> | Ballan wrasse ( <i>Labrus bergylta</i> )                 | cbx3 (Gene ID: 109994620)<br>LOC109986704                                                |
| <b>Cgo</b> | Channel bull blenny ( <i>Cottoperca gobio</i> )          | LOC115021151<br>LOC115016275                                                             |
| <b>Ena</b> | Live sharksucker ( <i>Echeneis naucrates</i> )           | LOC115051003<br>LOC115045440                                                             |

|            |                                                       |                                                                        |
|------------|-------------------------------------------------------|------------------------------------------------------------------------|
| <b>Pra</b> | Indian glassy fish ( <i>Parambassis ranga</i> )       | cbx3 (Gene ID: 114450982)<br>LOC114448349                              |
| <b>Lca</b> | Barramundi perch ( <i>Lates calcarifer</i> )          | LOC108891497<br>LOC108877463                                           |
| <b>Spa</b> | Bicolor damselfish ( <i>Stegastes partitus</i> )      | cbx3 (Gene ID: 103364037)<br>LOC103364624                              |
| <b>Apo</b> | Spiny chromis ( <i>Acanthochromis polyacanthus</i> )  | LOC110955790<br>LOC110951430                                           |
| <b>Aoc</b> | Clown anemonefish ( <i>Amphiprion ocellaris</i> )     | LOC111579711<br>LOC111588833                                           |
| <b>Ape</b> | Orange clownfish ( <i>Amphiprion percula</i> )        | cbx3a (ENSAPEG00000019335)<br>cbx3b (ENSAPEG00000010544)               |
| <b>Nco</b> | Black rockcod ( <i>Notothenia coriiceps</i> )         | cbx3 (Gene ID: 104949902)<br>LOC104966666                              |
| <b>Cse</b> | Tongue sole ( <i>Cynoglossus semilaevis</i> )         | LOC103394257<br>LOC103388431                                           |
| <b>Sma</b> | Turbot ( <i>Scophthalmus maximus</i> )                | cbx3a (ENSSMAG00000014860)<br>cbx3b (ENSSMAG00000020282)               |
| <b>Ame</b> | Mexican cavefish ( <i>Astyanax mexicanus</i> )        | LOC103046426                                                           |
| <b>Pna</b> | Red-bellied piranha ( <i>Pygocentrus nattereri</i> )  | LOC108425284<br>LOC108441518                                           |
| <b>Mar</b> | Zig-zag eel ( <i>Mastacembelus armatus</i> )          | LOC113122625<br>LOC113125891                                           |
| <b>Mal</b> | Swamp eel ( <i>Monopterus albus</i> )                 | LOC109968149<br>LOC109967352                                           |
| <b>Ate</b> | Climbing perch ( <i>Anabas testudineus</i> )          | LOC113170961<br>LOC113153869                                           |
| <b>Bsp</b> | Siamese fighting fish ( <i>Betta splendens</i> )      | LOC114865848<br>LOC114843466                                           |
| <b>Gwi</b> | Blunt-snouted clingfish ( <i>Gouania willdenowi</i> ) | LOC114472522<br>LOC114478298                                           |
| <b>Pma</b> | <i>Periophthalmus magnuspinnatus</i>                  | cbx3a (ENSPMGG00000006267)<br>cbx3b (ENSPMGG00000011799)               |
| <b>Sfa</b> | Jewelled blenny ( <i>Salarias fasciatus</i> )         | LOC115396622<br>LOC115381000                                           |
| <b>Ola</b> | Medaka ( <i>Oryzias latipes</i> )                     | LOC101159942<br>LOC100049459                                           |
| <b>Gac</b> | Stickleback ( <i>Gasterosteus aculeatus</i> )         | cbx3a (ENSGACG00000007069)<br>cbx3b (ENSGACG00000008334)               |
| <b>Hco</b> | Tiger tail seahorse ( <i>Hippocampus comes</i> )      | LOC109522111<br>LOC109525650                                           |
| <b>Pki</b> | Elephantfish ( <i>Paramormyrops kingsleyae</i> )      | LOC111846950<br>LOC111838987                                           |
| <b>Sfo</b> | Asian bonytongue ( <i>Scleropages formosus</i> )      | LOC108933414<br>LOC108933440<br>LOC108927377                           |
| <b>Gmo</b> | Cod ( <i>Gadus morhua</i> )                           | cbx3 (Gene ID: 115535606)<br>LOC115554036                              |
| <b>Ipu</b> | Channel catfish ( <i>Ictalurus punctatus</i> )        | cbx3 (Gene ID: 108271872)<br>cbx3-like (Gene ID: 100528511)            |
| <b>Eel</b> | Electric eel ( <i>Electrophorus electricus</i> )      | LOC113571151<br>LOC113580431                                           |
| <b>Cha</b> | Atlantic herring ( <i>Clupea harengus</i> )           | cbx3 (Gene ID: 105907686)<br>LOC105911400                              |
| <b>Dcl</b> | Denticle herring ( <i>Denticeps clupeoides</i> )      | LOC114797297<br>LOC114790202<br>LOC114796795*                          |
| <b>Elu</b> | Northern pike ( <i>Esox lucius</i> )                  | LOC105023664<br>LOC105018804                                           |
| <b>Ssa</b> | Atlantic salmon ( <i>Salmo salar</i> )                | cbx3 (Gene ID: 100195583)<br>LOC106588845<br>LOC106573104              |
| <b>Omy</b> | Rainbow trout ( <i>Oncorhynchus mykiss</i> )          | LOC110506239<br>LOC110496562<br>LOC110487945                           |
| <b>Oki</b> | Coho salmon ( <i>Oncorhynchus kisutch</i> )           | LOC109878229<br>LOC109907267<br>LOC109903322                           |
| <b>Sal</b> | Arctic char ( <i>Salvelinus alpinus</i> )             | LOC111955440<br>LOC112070715<br>LOC112079746*                          |
| <b>Hhu</b> | Huchen ( <i>Hucho hucho</i> )                         | ENSHHUG00000039337<br>cbx3a (ENSHHUG00000011830)<br>ENSHHUG00000050410 |

NCBI gene symbols in black or Ensembl entries in blue are indicated for 151 genes coding for CBX3 orthologues identified in 68 teleost species

° indicates a pseudogene

\* indicates that gene predictions generate an incomplete cDNA
