# Supplementary material for: The Polycomb Orthologues in Teleost Fishes and Their Expression in the Zebrafish Model
Source: MDPI journal article supplement (doi:10.3390/genes11040362), 2020-03-27
Supplement: s1 [file s1]

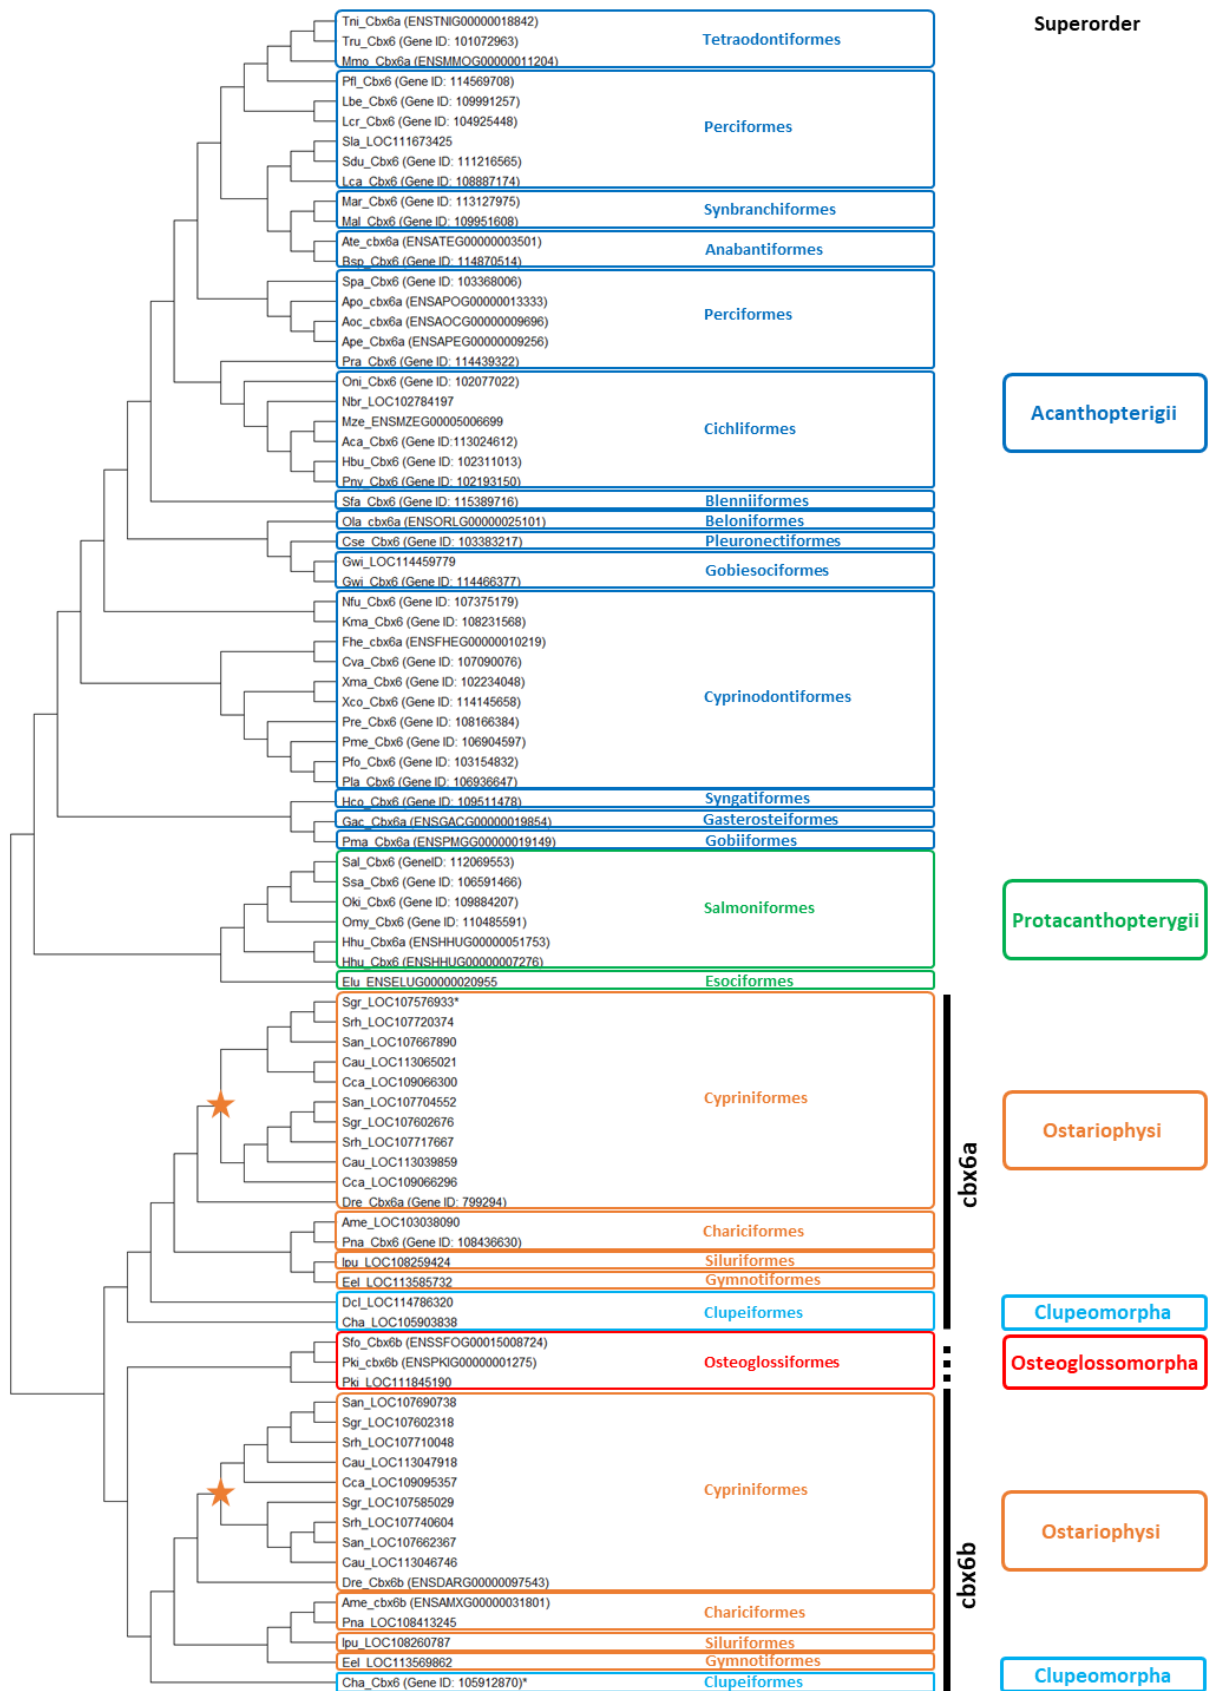

**Supplementary Figure S1. Phylogenetic tree of the evolutionary relationships between teleost *cbx6* paralogues.** The tree is generated using the Neighbor-Joining method. The analysis involved 84 amino acid sequences. All ambiguous position were removed for each sequence pair and there is 768 positions in the final dataset. Evolutionary analyses were conducted in MEGA X. The orange stars indicate the recent carp-specific whole-genome duplication (CsGD) that occurred in some Cyprinidae fishes.
