# Supplementary material for: The Polycomb Orthologues in Teleost Fishes and Their Expression in the Zebrafish Model
Source: MDPI journal article supplement (doi:10.3390/genes11040362), 2020-03-27
Supplement: s1 [file s1]

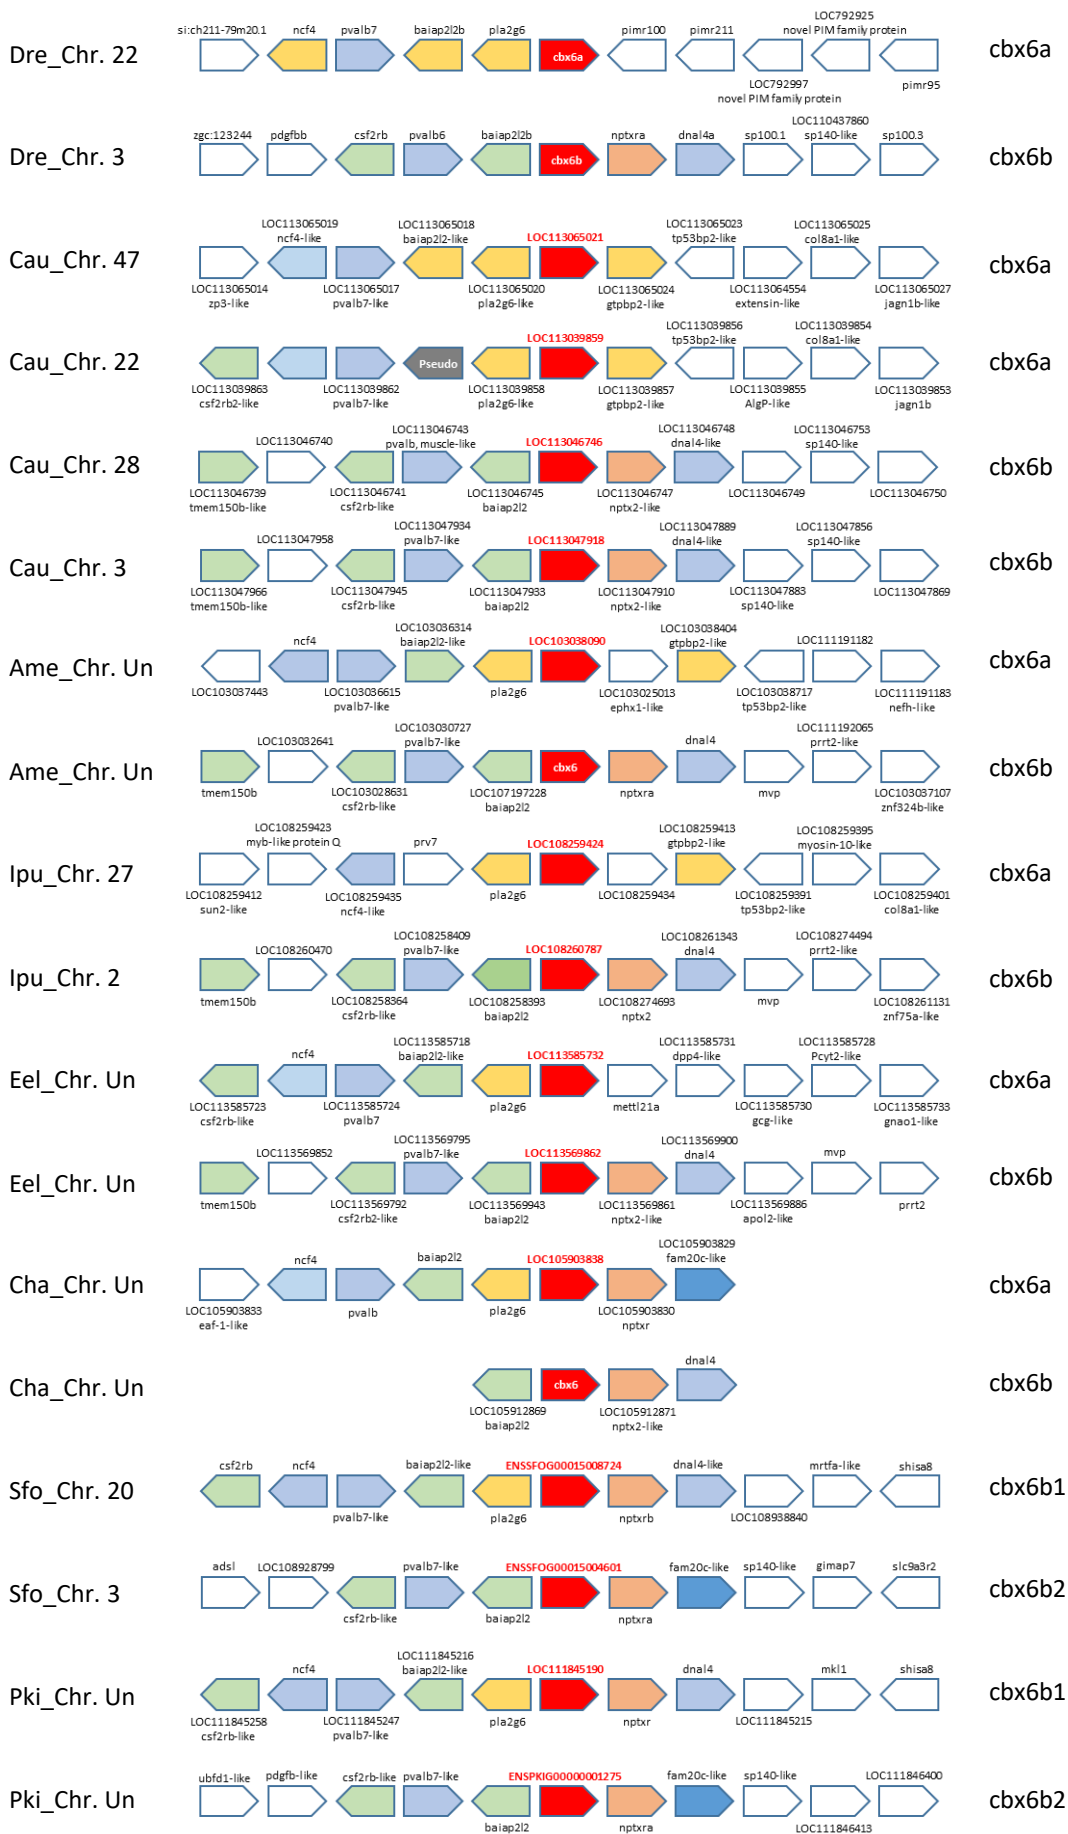

Ostariophysi

Clupeomorpha

Osteoglossomorpha

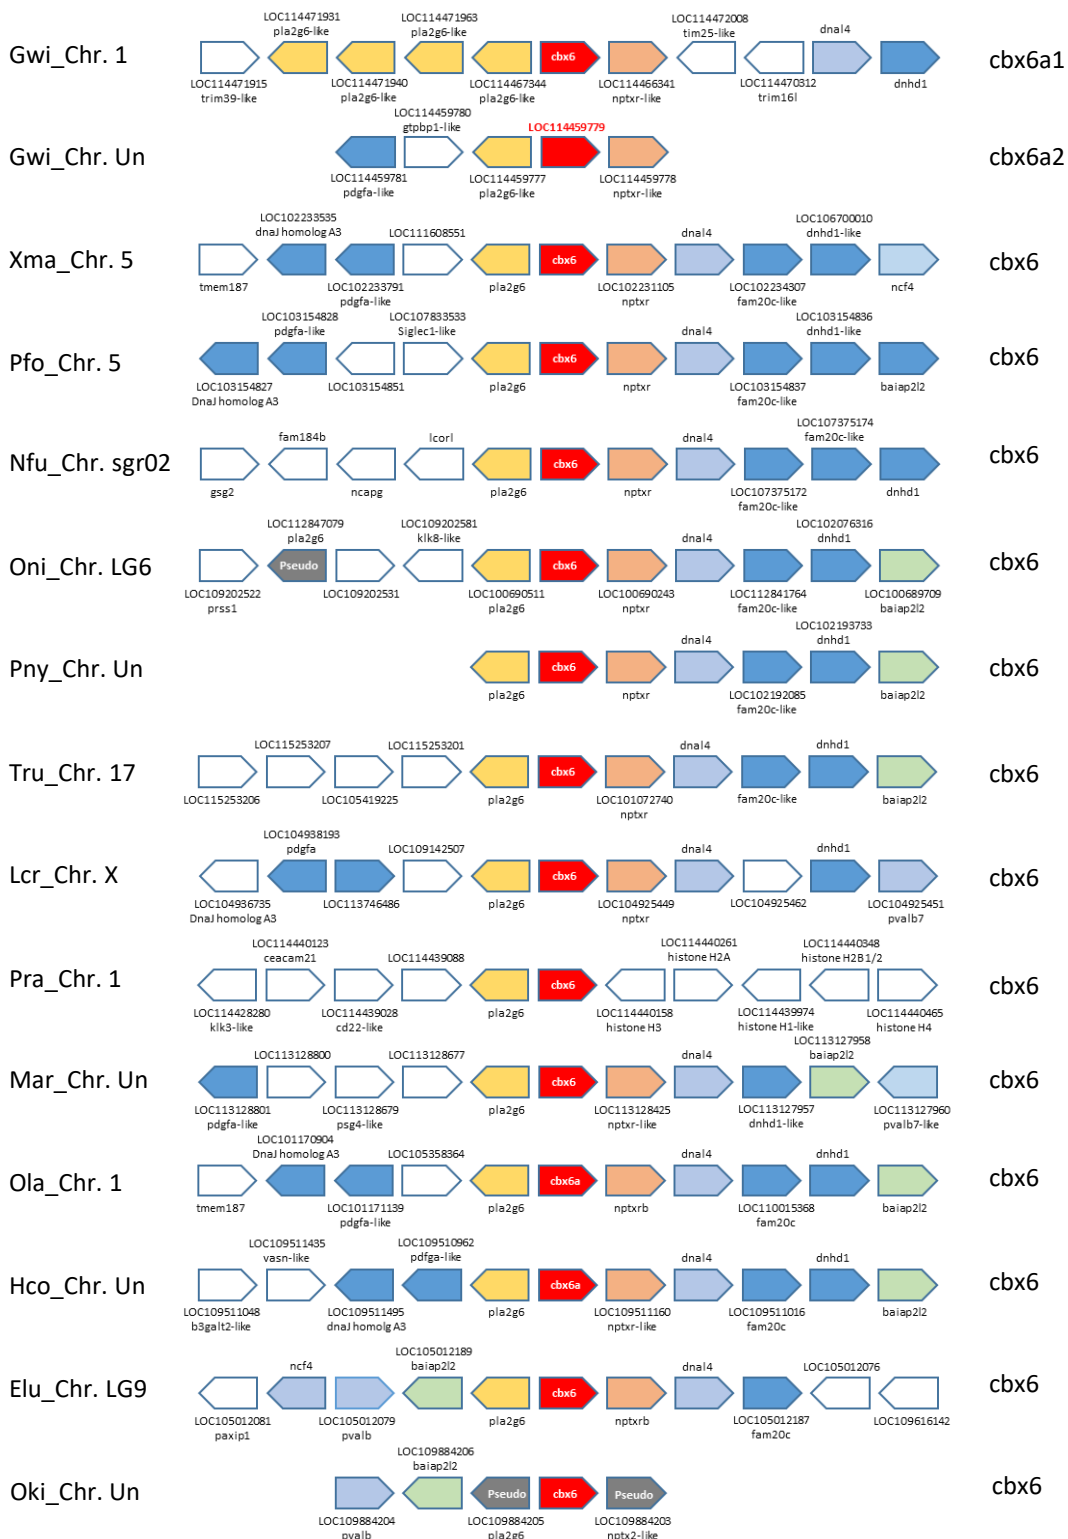

**Acanthopterygii**

**Protacanthopterygii**

**Supplementary Figure S3. Blocks of synteny at the *cbx6* loci in teleost fishes.** The *cbx6* genes are shown in red while orthologous gene loci are highlighted with different colors. Chromosomal locations of *cbx6* and the neighboring gene loci were drawn based on information from the NCBI Gene server. Chromosome (Chr.) or linkage group (LG) numbers are indicated. Un, unplaced scaffold. When indicated, *Cbx6* proteins from Osariophysi and Clupeomorpha are classified either as *Cbx6a* or as *Cbx6b* based on phylogenetic analyses.
