# Supplementary material for: The Polycomb Orthologues in Teleost Fishes and Their Expression in the Zebrafish Model
Source: MDPI journal article supplement (doi:10.3390/genes11040362), 2020-03-27
Supplement: s1 [file s1]

*cbx2*

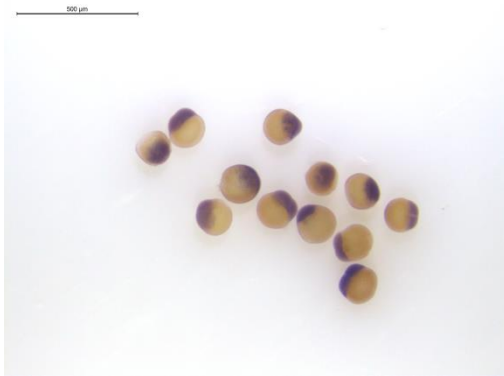

*cbx4*

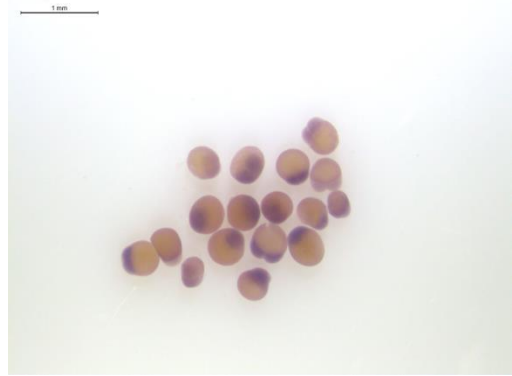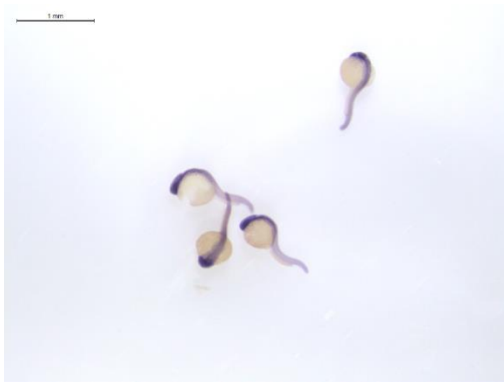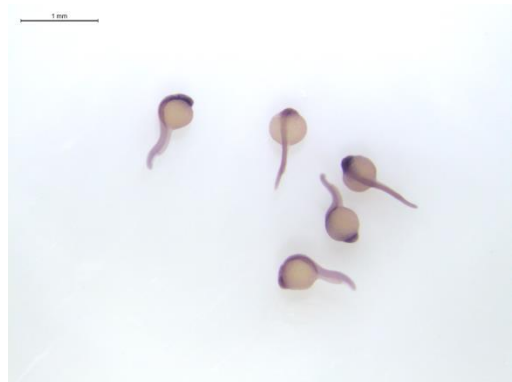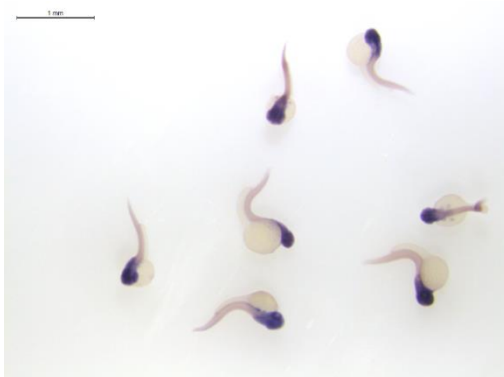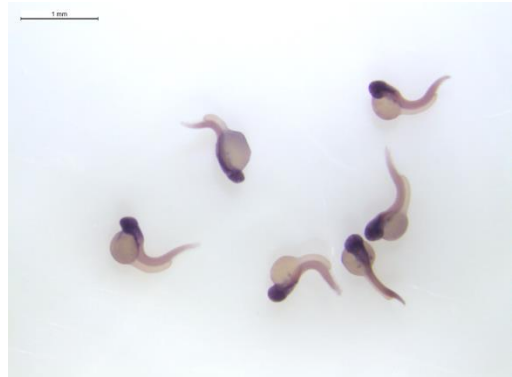

*cbx6a*

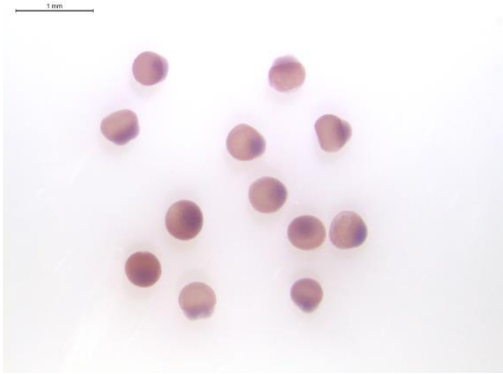

*cbx6b*

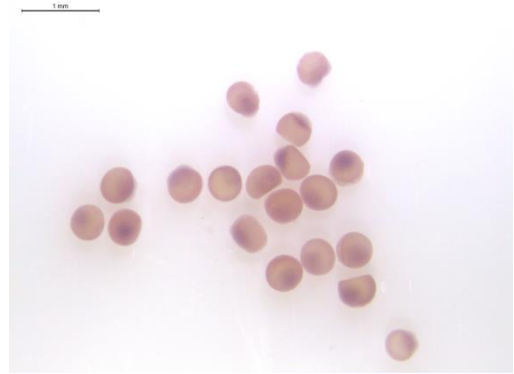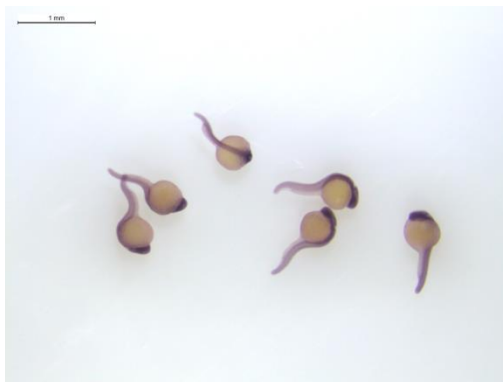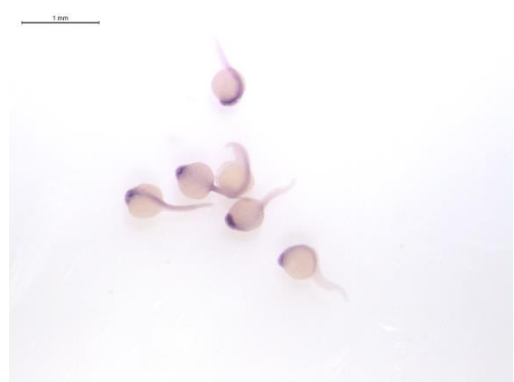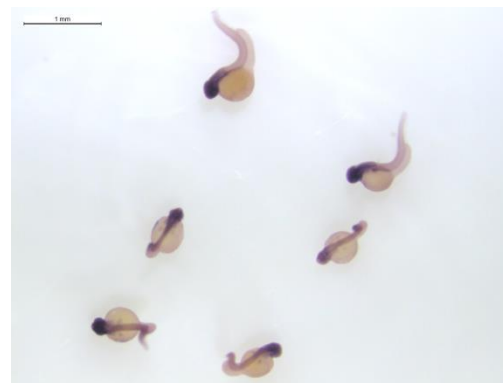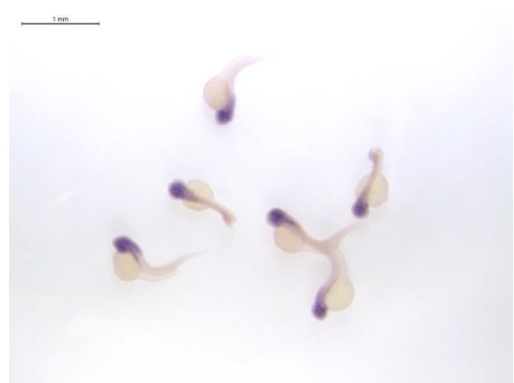

*cbx7a*

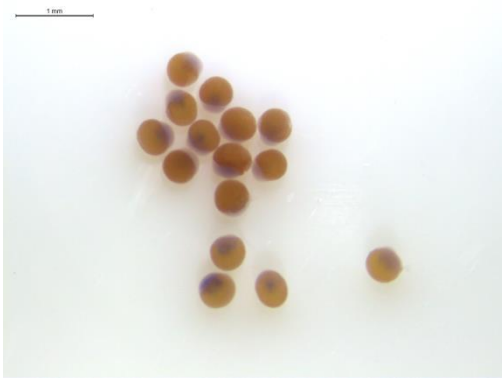

*cbx7b*

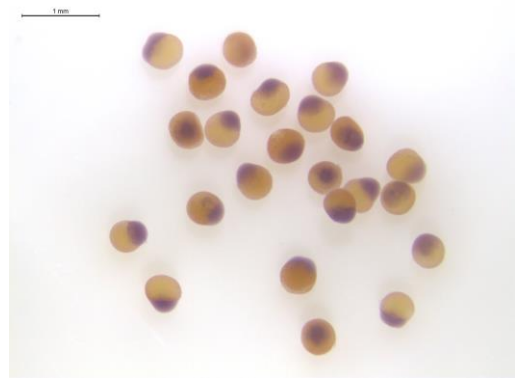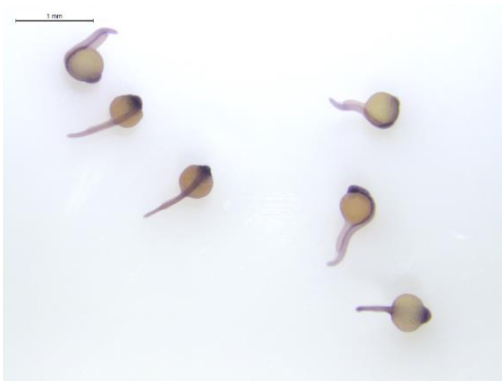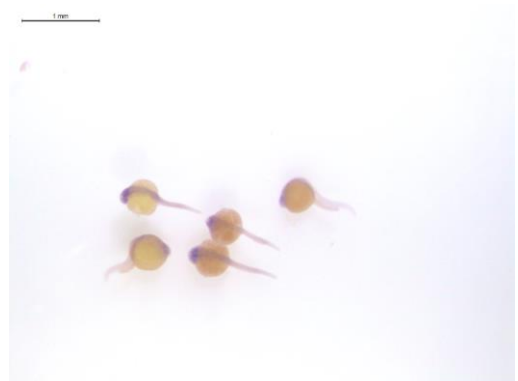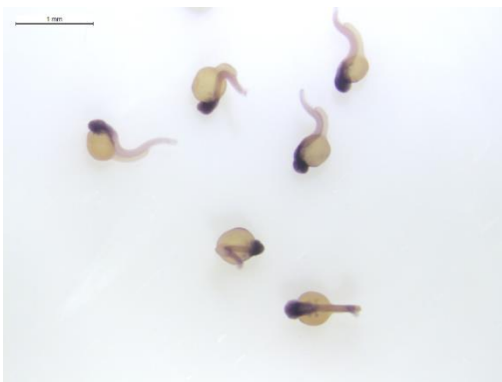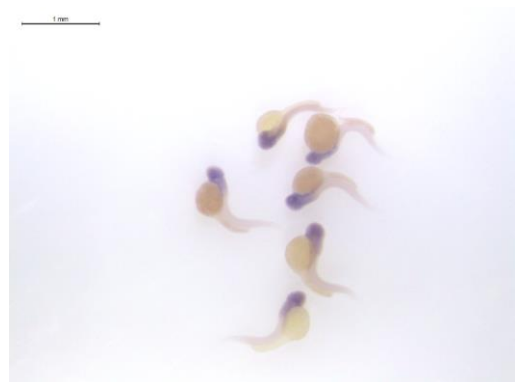

*cbx8a*

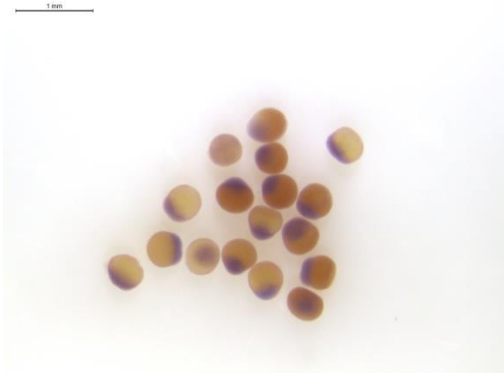

*cbx8b*

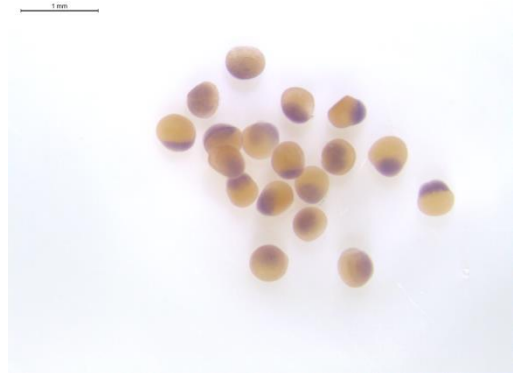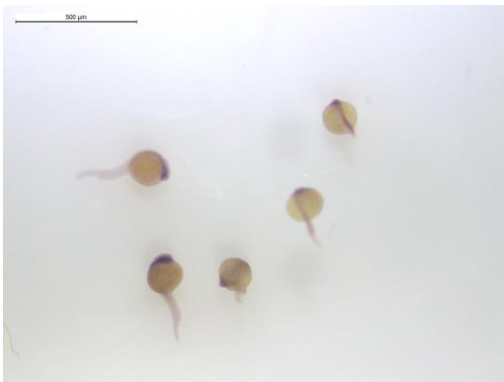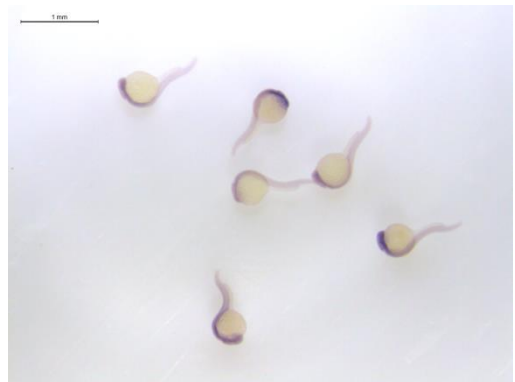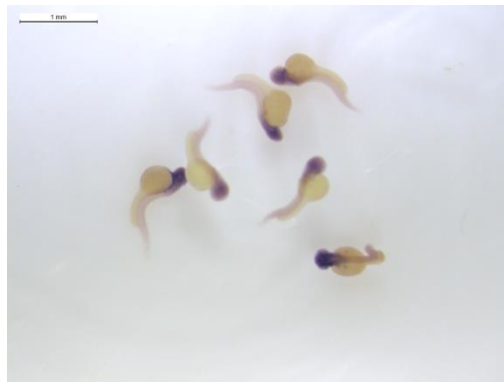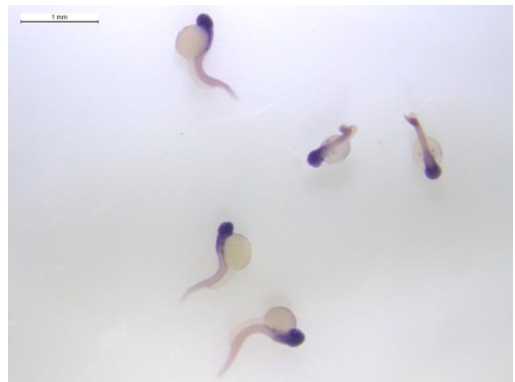

**Supplementary File S5. *In situ* hybridization on groups of zebrafish embryos at the 1-cell stage (upper panel), 24 hpf (middle panel) and 48 hpf (lower panel) for *cbx2*, *cbx4*, *cbx6a*, *cbx6b*, *cbx7a*, *cbx7b*, *cbx8a* and *cbx8b*. Scale bar is 1 mm.**
