# Supplementary material for: The Polycomb Orthologues in Teleost Fishes and Their Expression in the Zebrafish Model
Source: MDPI journal article supplement (doi:10.3390/genes11040362), 2020-03-27
Supplement: s1 [file s1]

MEELSAVGEQVFDAECILNRKTRKGKLEYLVKWRGWSSKHNSEWPQENLLDPRLLVAFNKREQEKELLISKKGKRPGRG  
RPRKIMETIPVVSKSSSSSSSSSSSSGSSSSSSSSSSSTDDDDDDHNMTPKPIPRPREHLPVPQKKAQIVVAKPGPP  
KRGRKALPPELKAIQVKGTRKILKPISRDSDLRGIKKPLMPASFYYTGLNRTSGREPAMHNRGSFTHKSSLSLGR  
SIGSVSSPPPTLNRSPQTKSADFKLSDVMDNSGLDPKTPTCKSPGVAALNLHSSNGQTCPQLSPTVPKQDTLLQRSAS  
LPKSPSSSFSSLLKTPSSLQALNLQSVNKTVQNGNTDLKTSPHSGRKS SGGFNTSSAPNTPSKFQTSQQALKSPQKLKAD  
DLAERLGKKSQARTEKILPTEGRDSQAQDRPSSKDLPSKQKTLSELSTGEEGSSSDTDHSSSFPRSDSHDLSISVQAG  
QDWRPTRSLIEHVFVTDVTANLVTVTVKESPTS VGFFSIRNY

MELPAVGEHVFAVEGIEKKRLRKGRMEYLVKWRGWSPKYNTWEPEENILDPRLLVAFQNRERQEQVMGYRKRGPKPKH  
PLIQLPAFARRSSITLGGQLDTSLEENQPKVDSLQMHRSRPQHYQLNSKKHHQYQPSCKEISVEQHMSGKKKHFYQLI  
SKKHHHYQPDPKMYDTPLTGPKVEKQGDPNSKGNLPPALQQKWIRNKDTGCLSKVKDLSIELKGLPDNANKAERTLK  
TSAKEFALPNGISSKMKI IKNNKNNGRIVIVMSKYMDKGVHSSKVKNRDVSQVGTVHNEEPPVNGTDNRSGETPDQG  
EGRENSIEKPS EYVDEKSLRKDMPGQKATEICDRPNSSPAKVDAKSNHLKRHLSEPS EDRNCKQLLSFRSISAPNS  
SPQREPINLHYKSSPVDNYDFSISIPEPIDLSAKTLKRFTALDKVSGSSAQMDKTDSQCKAFVGNVIITDITTNCLT  
VTFKEYVQE

MELSAAGDRVFAAEAILKSRVRKGHIEYLVKWKGWALKHSTWEPEENILDDRLIKAFEQKEREQELYGPEQELYGPKK  
RGPKPKNFVLKARQSGDRPRSSYTRRTPSCTTAKPPTASSASSATPQPSSSSSHSTAPTPRVHSLAAAHKLKDDIH  
RCHMMSRRPLPRSDPLANSTGSSSRHPISPFSETVRILNRRVKPREVKRGRILNLKVIDKSENGGMTSRRTPQSFAG  
RAKIPSRNRIIGKKHGDMPYRPFQHPMKMLGIPMYGQPFGLNPSSGGASSMANEGSNTRASHGGGSRCSQSQAQRFY  
QPTPSPNSSNGSSGSPSTQKQPTQKEGPTSSAKLTPTESSRSHDTSQPHPKSSSTPFLPSSPSYSSSPSSSQEDEDL  
GLSKSATSRGRKQLRHQTQVGRASVCQVSNQTTASFPKNRVPKEGDPDWHPEMAPSSANVVVTDVTTNLLTVTIKE  
FCNSGAGSDPSSPCQADNPNSPTTTAYK

MELSAAGDRVFAAEAILKRVRKGRMEYLVKWKGWAIKYSTWEPEENILDERLVAAFEQKEREQEMYGPKKRGPKPPT  
LLLSRAQAESPRVPEFKHSRPQPHSKPPPPPPPAAPSYTPTAPSNALQSGTAQPKLKDIHRCHRMARRPLPRQDI  
TVGSPGPFSSRPVSAFSETVRI LNRKVKPREVKGRVILNLKVLDKAENTAVANNKRTHPVSTQQSHFGRQKIPSRN  
RVIGKNRRFGEVSYRGIQPPIRSGSGFPVFVGKGLFDSHSLKNAESGESRNSMTNNLSSSQSSKLLDVSKGQNRNEEPPPS  
NSSESVHDGPEPPSRQTSQSHSLQPKASSTKSPSTKAPDPTLHLKGTQPVASKNKDSASSALPSSPMFSSSSSASTS  
SDNEHILDLSPHEMDRRLRRRFFSGRHPLKVPFVSEEPSEEEEDLDWRPDMT SRCANVVTDITANLLTVTIK  
EFCHPSPASSPPCYSKNVRTQNDTQQPKQNPNT

MELSSIGEQVFVAVESITKKRIRKGNVEYLLKWQGSFKYSTWEPEDNILDPRLLVLAFEEKAEKDRALAYKKKGLRPRQ  
VILRNIYPMDLRSAHKVPDKPSPRIRLSLTRSMSTEVQDQNRNRRYRDSVVYRRLKNRYKNRQCRSRLFEGIKPSKQPMR  
HPLPAKDCTENAWNEDEQKRKVKKMRKDEENTTQVHQDIPSGQEMSEGYNSSAEQESITIKEDENCSSIFDQEEKPS  
EDTGTGTAIGAPESSTITDTEKNPEVNTAGDEDCVWVSHDTTNTDQSLHKCTKSGAEEGVFDRVQNRPSVIEVRLSATC  
GQEEVRESAEVGSSEAKDKEGIDAEVTAEFQVPIDQLQTPVTTAVHPGKVIQVITQVTINSLTVTTFKEAMTAEGFFSECG  
LEV

MELSAIGEQVFVAVESI TKKRVRKGHVEYLLKWKGWPPKYSTWEPEEHI LDPRVLAYEEKEQKERSV VWRKRGRKPKR  
LHEQRSIYTM DLRSTHRHTDQSSAHLPLSLDPRFQST EACIFQQLNHHKKKKRAETSEEWD RREEEDDEDDEGEVME  
EGEEETRLGGTKGSSTLNKHVRREDWSP TTESEAMSLP EDWSPVMGP EEVMTDITINSLT VTFREALVARGFFSS  
WEME I

MELSAVGGERVFAAESIIKRRIIRGRMEYLVKWKGSQKYSTWEPEENILDERLFAAFEEREREREMYGPKKRGPKPET  
FLMKAKAKAKSKTYEFGREMSRDIRVSFPVAEPVVTFRAREGLRTVVPITFPPSTINRGESVRVRPPDSEDLTLTHGT  
SIQCPLDFTNSPKKRGPKPKMHPAGQSSSEGIKKADESLSYRPSKTERSGETSNCDIMHFTQKYKAETNHDGKQMG  
RSSDVKFSHGGSFLKAGLILGRHKGKVGSGGAINQAKMKHPPKNNLFRSTDQTREQLSLSFVDDTDQSWLPLCLKNME  
KIVVTDVTSNSLTVITIKESSTDGKGFKENR

MELSAVGNERVFAAESIKRRIRRGHMEYLVKWKGWSPKYSTWEPEENILDPRLFVAFEEREREIFGPKKRGPKLKT  
 FLLKAQAKEKAKSYEFRNDSSRGIHVITYSSPEPVVAPRAREGLRAVVPTIFPPSTVNRGESVRLQSPPEPREHHS  
 RPTDEFSLTLPKKRGRKPKLRFDTGYTSNLHPEHVKRAADETMASIPSKMAKLGLGEDDERCPDISGR  
 LKISHKDLDATCSHKQSNVIPSRSTLHISPQWSLHSSREAGLLGHRTNPOSNHFHQKHLKHYSKKRTLEHGD  
 STSRQPSLIAKIPVSHIFREPGVEADWRPSLVINVEKIVTDPVTNFLTGTIKESNTDEGFFKDKT

MRTVMEELSAVGGQVFDAECILNKRLKKGKLEYLVKWRGWSSKHNSWEPQENLLDPRLLAAFNKSLLKLSVSDMSSSGV  
DPTTPTCKSPGVAALNLHSSNGQTCPLSPNVPKASDQTLQLRSGSLQKSPSSSFSSSLKTPSSLQALNLQSITKTAQG  
NGTSTNDGSYLKDTSNPSRKSSGFNTRHEQSPALNVPSKFPTSQQVLKSPQLNKSVDLSERLGKKNQGRVDKILIQ  
TAEGRDHAPQDRSSSKDPGKPSKTLSELSTGEEGSSSDSDHESSFPSDNRDLAISVQAGQDWKPTRNLIEHVFTDVT  
ANLVTVTVKESPTSVGFFSIRNY

>Cca\_LOC109046180

MRRVMEELSAVGEQVFDAECILNKRLKKGKLEYLVKWRGWSSKHNSWEPQENLLDPRLLAAFNKRKSNTPTCKSPGV  
AALNIHSSNGQTCPLSPNVLKASDQTLQLRSGSLQKSPSSSFSSSLKTPSLQALNLQSINKTALNGTSANDGSYLK  
GAYNPDKKSSGFNPRREHSPAQNAPSKFPTNQVLKSPQRDKSKAAYLSERLGKKNQGRVDNIVVPTSEGRDQPVLDL  
SSYKADGKPSKILSELSTGEEGSSSDSDHDSTFRSDNHDLAISVQAGQDWKPTRSLIEHVFTDVTANLVTVTVKES  
TSVGFFSIRNY

>Cca\_Cbx4 (Gene ID: 109102575)

MELPAAGEHVFAVESIEKKRIRKGRCEYLVKWRGWSPKYNTWEPEENILDPRLLVAFQNRERQEQLIGYRKRGPKPKH  
LLLQVPSFARRSSVLSDLQEVSHGEDYQPKATSDLVQSQQYQLNGKKHHYPQPNPKDKQGEAQISGKKKHYYQLNSKK  
HHHYQPNPKMYSNLYQRVKETKVPETLTKENWLSPALQQKWIQDKDSGCLSKVRNITMGLKKLPKLNGEADLNMTNS  
DAKEDLNMTNSDAKEDKAPPNGVRSKLKIVKNKNKNGRIVIVMSKYMENGTQAAKIKEGTADSEKGGQADCKSCGTDETEKIKHTKK  
QSLVKGIKKDSKAGTACFMLSNGLSGCCGDNPKKACSI LFEPNNLKKPGNTGDYVSNEQHLQLTTKTSLTTPFEKSD  
QRGTQSTQYGPITFPQKRCYSEPDSDSREAKRFLSSQISAPNTDLSYSCNDTTHFNDHQHSSGHDFEILDSNQDEPI  
DLSCIRSREERKIATHSQIGNSIPTGKATVSTPEQVEKEMKKS VQSFTPFGLNIIITDVTANCLTVTTFKEYVTV

>Cca\_LOC109092326

MGYRKRGPKPKHLLQVPSFARRSSVLTDLQEVSQSEDNQSKTTSDLVPSQQYQLNSKKHHYPQPNPKDKQGEARING  
KMKHYFQLNSKKHHHYQPNPKMYDSLYQRVKETKVPETLTKENWLSPALQQKLIQSKDSECISKVRNITMELKKLPKL  
NGGADLNMTNSDAKEDKAPPNGVRSKLKIVKNKNKNGRIVIVMSKYMENGTQAAKIKEGTADSEKGGQADCKSCGT  
DETEKIKHTKKQSVVKVIKKDSKAESACFRLSNGLSGCCGDNPKKTCISIVFEPNNSKKPGSTGDYVSNEQPLQLTNK  
SVRQTSLTTPVIETSDQKGTQSTQYGPLSLPRKRCYSEPESDSGEVKRHLISQSTNTPNTDSCNGTTHFNDHQHSCGH  
DFENLDSNQDEPIDLSCVRLREERKNPTRSQIGNSIPTGKAAVSAPEQVEKEMKKS VQSFTPFGLNIIITDVTANCLT  
VTFKEYVTV

>Cca\_LOC109066300

MEVSAVGERVFPAEAILKSRVRKGRIEYLVKWKGWALKHSTWEPEENILDDRILITAFEKKEREQELYGPKKRGPKPKN  
FVLKARAQTGDRPRSSTQRTPPQIPAKLPASSSSASSAPSQPSSSSSLSTTPTPRVHSLAAAHKKKDIHRCHMRMSR  
RPLPRPDPLGEPTGSTSSSRPPIPFSETVRILNRRVKPREVKRGRIILNLNVIDKSENSGVTSRRSPQSFAGRAKIP  
SRNRIIGKKQGDMPYRPFQHPMKMLGFPMYGQPFGLHPCGSVSSMANEESNTGANRRRGNCDDSHSSANVQKFQYQTP  
PSPSSSSGSNNSSPSLQKQPTQPEAPTSPTKLDSAGSSRSQDASQPHPKSSSAPFLPSSPSYLSPPSFLDDEDQSSP  
NLTSRGRKRKLHRHTQVGRASLCQVSDRTTTPLPVETREPKEGD PDWHFQMTFSCNTNVVVTDVTTNLLTVTIKEFCH  
SGAGSETSSPCQADNPPCPTTAA

>Cca\_LOC109066296

MELSAEGERVFAAEAILKSRVRKGRIEYLVKWKGWALKHSTWEPEENILDDRILITAFEQKEREQELYGPKKRGPKPKN  
FVLKARAQAGDRPRSNTQRTPPRTAKPPASSSSAAAPQPSSSSSYNTAPTTPRVHSLAAAHKKKDIHRCHMRMSR  
RPLPRPDPLGDPTGSTSSSRPPIPFSETVRILNRRVKPREVKRGRIIVNLKVIDKSENSGVASRKTQPSFMGRAKIP  
SRNRIIGKKHGDMPYRPFQHPMKMLGFPMYGQPFGLNPGSMSSMANDGSNTVVNQRGGGCCDSHSSANAQKFQYQPP  
PSPSSSSGSINITPSLQKQATQPEAPTKLDSAASSRSRDASQPHPKSSSAPFLPSSPSYSSPSSSLEDEDQGSPLT  
TSRGGRKLHRHTQVGRASVCQVSDRTTAPLPEENRVPEKGD PDWHPEMAPSCTNVVVTDVTTNLLTVTIKEFCHSGA  
GSEPSSPCQADNPPCPTTAA

>Cca\_LOC109095357

MELSAAGDRVFAAEAILKRRVRKGRMEYLVKWKGWAIKYSTWEPEENILDERLVAAFEQKEREQEMYGPKKRGPKPKT  
LLLKSRAQVAETSSRVPEFKHTRPQQHSLPPPSAAPSYPAPTAPSNAKLQSGTAQPKLKKDIHRCHMRMARRPLPRPDQ  
TVGPSGPFSSRPTVSPFSETVRILNRKVKPREVKKGRVILNLKVVDKAGNGTVANSRRTHVPSAQQSHFGRQKIPSRN  
RVIGKNRRFGELSYRGIQTPIRSSGFVFGKLFDSHSLNNAENQTQSGESRNNMTNTLSSSQCSKLDASKGQTLDEL  
PSNSSSEVSDGEPHSPQTQSQHSSLQPKSSATKAPDPTLHLKLSGQTVPSKNSLAPSALPSSPMFSSSSSASSSEDN  
ERILDLSPHEMDRRLRHRHFPFSGRHPLKVPEVPVSEEPSEEEED LDWHPDMSQCANVVVTDITANLLTVRSRSSVI  
HPPLPLLPA TPKIYQLKMTQNSQSNTPTKHECRHRYALLQPSEGILEGLLVVCLQFQLPGAHVSLC

>Cca\_LOC109100093

MELSAIGEEVFAVESI IKRVRKGVHVEYLLKWKGWPPKYSTWEPEEHILDPRLVLAYEEKEQRERSVRCRKRGPCKPKR  
LFMQQNIYAMDLSAHKDAEKSSAHLPLSLDPRFQSTGACIYQRLTHHKKKKKTSRETSEEEDWDRREEEDDDDDDEGV  
MEEEEEEEEEEDTRQGGIKTGSNTLNKHVRRRCWSPTTESGAMTISPLP EDWSPVMGPPEEVIVTDITINSLTTFRE  
ALVARGFFRSWEME

>Cca\_LOC109076671

MNMEISSIGEQVFAVESITKKRIRKGNVEYLLKWKQGWPPKYSTWEPEDNILDPRVLAYEEKEEKERALAYKRKGLRP  
RRVILRNLYPMDLRSKHKVSDKSTPRIRLSLTRSMGTEIDQNGRRQCRIEKRKNRQYRSKLMNDIKRFQPPRRHPLLL



TQSTQYGPLTLPQKRCYSEPDSDSGEAKRLLISQSANAPNADFSHSCNSTTHFNHQQSGGHDFEILDSNQDEPIDLS  
CVRLREEKKNPHTSQIGNTIATGKAASAPEQVEKEMKKS **VRSFTPLGNIITDVTANCLTVTFKEYVTV**

>Cau\_LOC113052031

MDLPAVGEH**VFAVEGIEKKRLRKGRIEYLVKWRGWSAKYNTWEPEENILDPRLLVAFQNRER**QEQMVGYRKRGPKPKN  
PLVQLPAFARRSSILGGLQDTSLEENQPKVEPLQLHCSRPHYQLNSKKHHQYQPSCREISIEQNVSGKKHHFYQLN  
SKKHHHYQPDPKMYDTPLTGPNEVRVQDPSSKVVNLPPALQQKWIRNKDTSCLSKVKDLSIELKSLPDNADKAERALK  
TNTKEFALPNGIRSKMKI IKNNKNGRIVIVMSKYMDKGVHSSKVKNKDVSQVETQHNEESTLNNKDNLSGETSEGR  
ENGTAENTNTFSSSECIHENSIMAELSKATSTETEQTVMYICNPSSPMEAEKAPP SHMDTKLNQRKRNLSIEPIE  
DVRNCKQFISSRIIHTNSVQDYAPNTMLSSPQREPIDLHYRGCLASRAYSYDLSDTSPEEPIDLSGCGPTKTLKQFPTA  
EKVSGSSVQV **ENTNNHFKPFVGNVIITDITNCVTVTTFKEYVHG**

>Cau\_LOC113046661

MDLPAVGEH**VFAVEGIEKKRLRKGRIEYLVKWRGWSAKYNTWEPEENILDPRLLVAFQNRER**QEQMVGYRKRGPKSKH  
PLVQLPAFARRSSILGGLQDTSLEENQPKVEPLQIHSRPHYQLNSKKHHQYQPSCREISIEQHVSGKKHHFYQLN  
SKKHHHYQPDPKMYDTPLTRPKEVKVQDPSPKGNLPPAFHQKWIRNKDSGCLSKVKDLSIELKSLPDNGNKAERALK  
TSAKEFALPNGISSMKI IKNNKNGRIVIVMSKYMDKGVHSSKVKNKDASKMDAEHNEKSTLNKTDNLSDAETSAGR  
ENGSVENAGTSSSECIHKTSSKKAELPKDTPSETEQMVIDLCDQPAENAAPAHPDTKLNHRKRNLSIEPKKEVRNC  
KQFFSSRSISAPNTVLSSPQREPMNLHYSRSLASRAYSYDFS DPIPEEPIDLSGCGPTKTLKQFPTAEKVSGSSAQVEK  
**TNSHGKPFVGNVIITDITNCVTVTTFKEYIQG**

>Cau\_LOC113065021

MEVSAVGER**VFPAAEAILKSRVRKGRIEYLVKWKGWALKHSTWEPEENILDDRLLAAFEQKER**QOELYGPKKRGPCKPKN  
FVLKARAHAGDRPRSSDTQRTPPQISNTQRTPPRITAKLPSSSSSASSAPPQSSSSSFSTAPTPRVHSLAAAHKLKK  
DIHRCHMRMRPLPRPDLPGEPTGSTTSSRPPI SPFSETVRILNRRVKTRVVKRGRILNLNVIDKSENSGVTSRRSP  
QSFGARAKIPSRNRIIGKKQGDMPYRPFQHPMKMLGFPYMGQPFGLHPCGSVSSMANEESKTGANQRGNCDDSHSSA  
STQKFQYQHPPSPSSSGSNSSLSLQKTQTPLEAPMSPTKLDSSASSRSQDSSQPHPKSSAPFLPSSHYSYSSPSF  
SLEDEDQGSQNLTTSRGRKRKLQHRTQVGRASVCQVSDCTTTPLPEETREPKEGN **PDWHPEMTPSCTNVVTVDTVTNLI**  
**LTVTIKEFCQS**GAGSKPSSPCQADNPP

>Cau\_LOC113039859

MELSAEGER**VFAAEAILKSRVRKGRIEYLVKWKGWALKHSTWEPEENILDDRLLITAFEQKER**EQELYGPKKRGPCKPKN  
FVLKARAHAGDRPRSSNTQRTPPRTTAKPPASSTSASAAPPQPSLSSSYNTAPTTPRVHSLAAAHKLKKDIHRCHMRMR  
RPLPRPDPLGNPRGSTSSSRPPI SPFSETVRILNRRVKPREVKRGRILNLKVIDKSENSGVASRRTPQSFTGRAKIP  
SRNRIIGKKHGDMPYRPFQHPMKMLGFPYMGQPFGLNPGSMSSMANEGSNTGVNQRRGGGCCDSHSSASTQKFQYQPP  
PSPSSSSGSNNPSPSPQKQATQPEAPTCLDSAASTCSQDASQPHPKSSAPFLPSSPSYSTSPSSSIEDDEDQGSPLA  
ISRGGKRLRHRTQVGRASVCQVSDCTTTPLPEENRVKPEGD **PDWHPEMAPSCANVVTVDTVTNLLTVTIKEFCQSGA**  
EPSSPCQADKPPCPTTAAS

>Cau\_LOC113046746

MELSAAGDR**VFAAEAILKRRIRKGRMEYLVKWKGWAIKYSTWEPEENILDERLVAAFEQKER**EQELYGPKKRGPCKPKT  
LLLKSRAQVADTSSRVPEFKHTRPQQHSLKPPPSATPSYTPTVPSNAKLQSGTAQPKLKKDIHRCHMRMRPLPRPDQ  
TIGPSSPFSSRPTVSPFSETVRILNRKVKPREVKKGRVILNLKVVDKAGNGAVANSRRTHVPSTQQSHFGRKIPSRN  
RVIGKNRRFGEFSYRGIPTPNRNSGFPVFGKLFDSHLSNAENQTQSGESRNNTTNLASSQSSKADVSKGQTLDEL  
PSNNSSEVSDGEPSPSPQTQSQHSSLPPKASATKAQDPALHKLKSAQPAASKNSSGSPALPSSPMFSSSSSASSSSSEDN  
EHILDLSVPHEMDRRLRRRHFPFSGRHPLKVPEVPVSEEPSEEEED **LDWHFDMTSCANVVVTDITANLLTVTIKEFCH**  
**EPSATPPPCYPKNISQHDTKQPKDHPNKA**

>Cau\_LOC113047918

MELSAAGDR**VFAAEAILKRRVRKGRMEYLVKWKGWAIKYSTWEPEENILDERLVAAFEQKER**EQEMYGPKKRGPCKPKL  
LLLKSRAQVAETSSRVPEFKHTRPQQHSLKPPPSAAPSYPAPTAPSNAKLQSGTAQPKLKKDIHRCHMRMRPLPRPDQ  
TVSPSGFPSSRPTVSPFSETVRILNRKVKPREVKKGRVILNLKVVDKAGHGGVPNSRRTHVPSAQSSHFGKQIPSRN  
RVIGKNRRFGEFSYRGIPTPNRNSGFPVFGKLFDSHLSNAENQTQSGESRDNTAKNLSSSKNQTLDELPPSNSSSEV  
SDGEPNSPPQTQSQRSSLQPKSSTIKAPDPTLHKHSAQTVPSENSLVPTSLPSSPMFSSSSSASSSSSEDNERILDLSV  
PHEMDKRLRRRHFPFSGRHPLKVPEVPVSEEPSEEEED **LDWRPDMTSCANVVVTDITANLLTVTIKEFCH**PSVNPP  
CYPKNILAQHDTKQPKQHPNKT

>Cau\_LOC113047419

MNMEISSIGE**QVFAVESITKKRIRKGNVEYLLKWQGWAPKYSTWEPEDNILDPRVLAYEKEE**EKERALAYKRKGLRP  
RRVILRSIYPMDLRSKHKVPDKPIPRIRLSLTRSMGTIDQNGRHYRPIEKYKNRQCRSKLLSDIKLSQHSPPAKDSE  
KEWDGDEDEQKKKVIIMMIENEEKTTEVHQDIPSSQETMDGYSSSAEHEAVIIKETENCSSIEYHAEKPSSEDSSQVL  
GATETSPISNTQENEPVTNTTGGEDSIRVSHDTTNDHSLHNSTESGAKQGVLDKVNRPVIEVHSSSTKCRQEEVRE  
RDEVDRWEAKEKEGMDGITAEHTLLQVPTD **QSQTPTTTVHPGKVTVTQVTINSLTVTFKEAMSA**EGFFGDDELEI

>Cau\_LOC113046823

MNMEISSIGE**QVFAVESITKKRIRKGNVEYLLKWQGWPPKEEKERALAYKRKGL**LRPRQVILRNLYPMDLRSKHKVSDK  
STPRIRLSLTRSMGTIDQNGRRQRLEKRNRRYSKLMNDIKRFQPPRRHPLLLKDSEKEWDGDEEEDQKRKVKKM  
RANEENTPEVHQDIPSGQEMSEGYNSSAEHEAVITIEETENCSSIFDHAEKPSKDTGPVLGATVYSTITNTQEKEPVT



QRGQTQSTQYGPITFPQKRCYSEPDSDSREAKRFLSSQSISAPNTDLSHSCNGTTHFDDHQHSGGHDFFEILDSNQDEPI  
DLSCVRSREERKIPTHSQIGNSVPTGKAAVSTPEQVEKEIKKS **VQSFTPLGNIIITDVTANCLTVTFKEYVTV**

>Sgr\_LOC107553295

MELPAAGEH **VFAVESIEKKRIRKGRCEYLVKWRGWSPKYNTWEPEENILDPRLLVAFQNRER** QEQLMGYRKRGPKPKH  
LLLQVPSFARRSSVLIDLQEVSQGEDNQSKTTSDLVQSQQYQLNSKKHHSYQLNPKDKQGEARINGEKKHYQLNSKK  
HHHYQPNPKMYDSLYQRVKETKGPELSDKEWNLSPALQQKWVQSKDSECLSKVRNITMGLKKLPKLNGGADLNMTNS  
DAKEDKAPPNGISSKLKIVKNKNKNGRIVIVMSKYMENGTAQAAIKKATADSEEKMQAQDCKSCGKDESTEKIKHTKK  
QSLVKVIKKDSKAESACFRLSNGLSSCGGDNPKKTCISVFEPPNNSKKPGSTGDDVSNEQPLQLTNKTSLTTPVPIEKSD  
QKGTQSTQYGPLTFPRKRCYSEPDSDSGEAKRLLISQRTNAPNTDLSHSCNGTTQFNDHQHSGGHDFFKMLDSNQDEPI  
DLSCVRLREERKNPTHSQIGNSIPTGKAAVSAPEQVEKEMKKS **VRSFTPLGNIIITDVTANCLTVTFKEYVTV**

>Sgr\_LOC107562304

MDLPAVGEH **VFAVEGIEKKRLRKGRIEYLVKWRGWSAKYNTWEPEENILDPRLLVAFQNRER** QEOMVGYRKRGPKPKH  
PLVQLPAFARRSSILGGLEDTSLDEENQPKVDPLQLHCPRPQHYQLNSKKHHQYQPSCKEISVEQHVSGKKKHFYQLN  
SKKHHHYQPDPMYDTPLTGPKVEKVQDPSSKVNLPALQQKWIQNKDCLSKVKDLSIELKGLPDNANKSERALKTK  
AKEFALPNGISSKMKIKNKNKNGRIVIVMSKYMDKRVHSSKVNKDVEVETQHNEEPTLNKTDNLSDGETSEGLEN  
GDTENTNTFSSSECVHENAIAKKVELPKDMPETEQTVMYICDQANSSPMEAEKAPPSHMDTKLNHRKRLNLEPNEDMR  
NCKQFFSSRSISALNTVLSSPQREPIDLHYRGLSNTRAYSDFSDTIPEEPIDLSCGPTKTLQLFPTAEKVSQSSAQV  
E **KTNNHFKFPVGNVITDITTNCLTVTFKEYVQG**

>Sgr\_LOC107559247

MDLPAVGEH **VFAVEGIEKKRLRKGRIEYLVKWRGWSAKYNTWEPEENILDPRLLVAFQNRER** QEOMMGYHKGPKSKH  
PLVQLPAFARRSSILGGLEDTSLDEENQPKAEPLQIHRSWPQHYQLNSKKHHQYQPSCKEISVEQHVSGKKKHFYQLN  
SKKHHHYQPDPMYDTPLTGPKVEKVQDPSSKVNLPALQQKWIQNKDCLSKVKDLSIELKSLPDNANKAERALK  
TSAKEFALPNGIGSKMKIKNKNKNGRIVIVMSKYMDKGVHPSKVKSKDVSQVEAQHNEEATLNNTDNPSDGETSAGR  
ENGVENTSTFSSSECIHKNISIKKAEPLKDTPTETEQTIVIDLCDQPNSEKAAPAHTDTGLNHRKRLNLEPNEDVRTC  
KQFFSSRSISAPNTVLSSPQREPINLHYRGLADRAYSYDFSDTIPEEPIDLSCGPTKTLQLFPTAEKVSQSSAPVEK  
**TNSHVKFPVGNVITDITTNCLTVTFKEYVQG**

>Sgr\_LOC107602318

MELSAAGDR **VFAAEAIMKRRVRKGRMEYLVKWKGWAIKYSTWEPEENILDERLVAAFEQKER** QEOMYGPKKRGPKPKT  
LLLKSRAQVTTETSSRVQFKHTRPQQHSLPPPSAAPSYPPTTPSNAKLQSGAAQPKLKKDIHRCHRMARRPLRPDQ  
TVSPSGFPSSRPTVSPFSETVRIILNRKVKPREVKKGRVILNLKVVDKAGNGGVANSRRTHVPSAQSSHFRQKIPSQN  
RVIGKNRRFGELSYRGIQTPIRSSGFVPVFGKLFESHSLNNAENQTQSGESRNNTTNNLSSSQSSKVDASKGQTLDEL  
QSNSSSEVSDGEPSPPTQSQHSSLQPKSATKAPDPTLHLKLSAQVPVPSKNSLGLSALPSSPMFSSSSSASSSSSED  
ERILDLVPHEMDRRLRRRHFPFSGRHPLKVPEVPVSEEPSEEEED **LDWHPDMSQCANVVVTDITANLLTVTIKEFCH**  
**PPSATPPPCYPKNISAQHDTKQPKHHPNKT**

>Sgr\_LOC107585029

MELSAAGDR **VFAAEAILKRRIRKGRMEYLVKWKGWAIKYSTWEPEENILDERLVAAFEQKER** QEOMYGPKKRGPKPKT  
LLLKSRAQVAETSSRVPEFKHTRPQQHSLPPPSAAPSYPPTAPSNAKLQSGTAQPKLKKDIHRCHRMARRPLRPDQ  
TVGPSSFPSSRPTVSPFSETVRIILNRKVKPREVKKGRVILNLKVVDKAGNGGVANSRRTHVPSAQSSHFRQKIPSR  
NRVIGKNRRFGEVSYRGIQTPIRSSGFVPVFGKLFDSHSLNNAENQTQSGESCNNTTNNLSSSQSSKVDVSKVQTLDEL  
HPSNNSSEVSDGEPSPPTQSQHSSLPPKASATKAQDPALHLKLSAQPVASKNSSGPSAVPSSPMFSSSSSASSSSSED  
NEHILDLSVPHEMDRRLRRRHFPFSGRHPLKVPEVPVSEEPSEEEEDF **DWHPDMSQCANVVVTDITANLLTVTIKEFC**  
**HPPSATPPPCYPKNISAQHDTKQPKQHPNKT**

>Sgr\_LOC107602676

MELSAVGER **VFAAEAILKSRVRKGRIEYLLKWKGWALKHSTWEPEGNILDDRLLITAFEQKER** QEELYGPKKRGPKPKN  
FVLKARAQAGDRPRSSNTQRTPPRTTAKPPASSSSASAAPPPSSSSSYNTAPTTPRVHSLAAAHKLKKDIHRCHMR  
RPLRPDPLGDPMTTSLSRPPISPFSETVRIILNRVKPREVKGRIVLNLKVIDKSQIPSRNRIIGKKHGDMPYRPF  
QHMKMLGFPMYGPFGPLNPGSMSSMANEGSNTGVNRRGGGCCDSHSSANAQKFQYQPPSPSSSSSGNNSPSPQK  
QVTQPEAPTCLDSAASSSRSDASQPHPKSSSVFPLSPSPSYSSSSLEGENQGSPLVTSQGGKRLRHRTQVGRASVC  
QVSDRNTAPLPEENRVPEKGD **PDWHPMAPSSANVVVTDVTTNLLTVTIKEFCHS** GAGSEPPSPCQADKPPCPTTAS

>Sgr\_LOC107576933\*

MSYFPLWKCRPTIHREREQEELYGPKKRGPKPKNFVLKARAQAGDRPRSSNTRTPPHTTAKPPASSSSASSSSSFST  
APTTPRVHSLAAAHKLKKDIHRCHMRMRPLRPDPLGDSGTSSSRPPISPFSETVRIILNRVKPREVKGRIILNL  
NVIDKSENSGVTSRRSPQSFAGRAKIPSRNRIIGKKQGDMPYRPFQHMKMLGFPMYGPFGPLHPCGSMSSMANEESN  
TGANRRGGNCCDSHSSANAQKFQYQPPSPSSFSGSNNSSPSLQKQPTQPEAPTSPTKLSAASSSRSDASQPPPKSS  
SVFPLPSSLEDEDQGSPLNATSRGRKRKLHRHTQVQGASVCQVSDRNTTTPHPEENREPKEGD **PDWNPEMAPSCTNVVV**  
**TDVTTNLLTVTIKEFCHS** GAGSEPPSPCQADNPPCPTTAS

>Sgr\_LOC107584093

MELSAIGE **QVFAVESILKRRVRKGVHVEYLLKWKGWPPKYSTWEPEEHILDPRLVLTYEKEQE** RERSVRWRKRGPKPKR  
LFVQPHIALLRNIYAMDLSAHKDETEKSSVHLPLSLDPRFQSTGACIYRQLTHHKKKKKASRETSEEEDWRREDDDD



>Sgr\_LOC107554058  
MELSAIGEQVFAVESI IKKRVRKGHVEYLLKWKGWPPKYSTWEPEEHLDPRLVLAYEEKEERERSVRWRKRGP KPKR  
LFMQRN IYAMDLSAHKATENSSAHLPLSLDPRFQSTGACIYQRLTHHKKKKKTSRETSEEWDREEDDHEDDDDEG  
VMEEEEDTRGGTKTGSNTLNKHVRRGRWIPTTESAAMTISLPL EDWSPVMGPEEVIVTDITINSLTVTFREALVA  
GFFRSWEME I

>Sgr\_LOC107578989  
MELSAVGERVFAAESIIKRRIIRGRMEYLVKWKGSQKYSTWEPEENILDERLFAAFEEREREREMYGPKKRGPKPET  
FLMKVKAKAKGKNCEFRREMSRDLHVSFPVAEPVTPRAREGLRTVVTPIFPSTINRGESVRVHPPVSERDPLMHGM  
LVQRPLDFASSPKKRGPKLRLPGGSSTEGVKKKADEPLSYRPSKTERSGETSNCDEVRLTQKFQAESSHVKKQMGSR  
SSDVKFTHSGNLIKAGLGLVGHRRKDSPSGAIKQSKMKHPPKSNLFRSTDQTREQLSLSFVDETDQSWLPCLKMEKI  
VSDVTSNSLTVTIKESSTDKGFFKENR

>Sgr\_LOC107601979  
MELSAVGERVFAAESIIKRRIIRGRMEYLVKWKGWSPKYSTWEPEENILDSRLFVAFEEREREIERIFGPKKRGPKLKT  
FLLKAQTKAKASYEFRNESFRGITYPSPEPVVTPRAREGLRAVVPISIFPSTVNRGESVRIPPEPREHRSPhSPRP  
STDAFTLAPKKRGRKPKLRFDTGTYSSLNPEHLKRAADETMASIPSKMAKLGLGEEEEERCSEISGRIKISHKHM DATY  
SHQNRVVPSTQHSIPWSLHSSRVSDALQGCRRNPQTSFHFKHKLKYHKKRRIFEHADSTSRHPSLIAKIPVSRI  
FGEPEEGDAWRPSFSNVEKVIIVDVTNSFLTVTIKESSTDKGFFDKKR

>Sgr\_LOC107553294  
MELSAVGERVFAAESIIKRRIIRGRMGYLVKWKWGSFKYSTWEPEENILDSRLFVAFEEREREIFGPKKRGPKLKT  
FLLKAQAKEKAKSYGFRNESPRGTIEYPSPEPLVTPRAREGLRSVPTIFPSTVNRGESVRIPPEPREHRSPhSPRP  
STDAFTLTPKKRGRPKLCLFTDGTSSLHPEHskRAADETMASIPskMAKLGLGEEEEERCSEISGRIKISHKMDATY  
SHKQNRVVPsRSTQHISPEWSLHSSRVsADLQGHRTNPQTSHFHKKLKHHSKRRTFEHGDSTSRQPSLIAKIPVSRI  
FGEPEEGDAWRPTCNVEKVIIVDTsNFLVTIKESSTDkGFFKDKR

>SrH\_LOC107718939  
MRRVMEELSAVGEOVFDAECILNKRRLKRGKLEYLVKWGRGWSSKHNSWEFQENLLDPRLLAAFNKREQERELLISKKG  
RPRGRPRKILEIPVVSKSSSSSSSSSSSGSSSSSSSSSSSDDDDEDDNDRNPKPSPRPREHHVPVQKKAQIVVAK  
PEPPKKKRGRKALPPELKAQHQAQGPRKILKPISRDSELRRSIKKPLMPASFYTNGLNRNSGRELMALQNRGYFTQKS  
SLSSLGRSIGSASSPTALS RPPQSKTASDFKLVSVDMSGGVDPNAPTCKSPGVAALNIHSSNGQTCPQLSPNVLKVS  
DQTLLQRSGSLQKSPSSSFSSLKTPSSLQALNLQSINKTAQGNGTSVNDGSYLKGTSNPGRKSYVFNARHEHSPAPNT  
PSKFPTNQVLKSPORDKSKADDLSERLGKKTGREDKILVPTISEGRDQVPVDRSSDKAGKPSKTLSLSTGEEGSS  
SDSDHDSSFFSDPNRDLAISVOAGODWRPTRSLIEHFVFDVTANILVTVTVESPTS VGFFSIRNY

>SrH\_LOC107710978  
MRTVMEELSAVGEOVFDAECILNKRRLRKGKLEYLVKWRGWSSKHNSWEPQENLLDPRLLAAFNKREQERELLIHNKGK  
RPRGRPRKILETIPVVSKSSSSSSSSSSSSGSSSSSSSSSFSSDDNDEDNDNRNPKPSRPREHHPVPQKKAQIVVAKP  
EPPKKRGRKALPPELKAORQAKGPRKMLKPISRDSELOGSIKKPLMPASFTYTGLNRNSGREPMALONRGSFSTOKNS

LSSLGRSVGLASLPATLSRLPQTKTASDFKLSVSDMSSGGVDPKTPCTCKSPGVAALNLHSSNGQTCPLSPNAPKASD  
QTLQQRSGSLQKSPSSSFSSSKTPSSSLQALNLQSVNKMTOGNGTSTNDGSYLKGTANPSRKSSGFNARHEQSPEPNVP  
SKFPTSQQVLKSPQRDKSKADDLSERLGKNNQGRVDKILTQTTEGRDHPTQDRSSSKDAGKPSKTLSELSTGEEGSSS  
DSDHDSFSPSDNRDLAISVQAGQDWRPTRNLIEHVFVTDVTANLVTVTVKESPTSVGFFSIRNY

>Srh\_Cbx4 (Gene ID: 107710281)

MELPTAGEHVFAVESIEKKRIRKGRCEYLVKWRGWSPKYNTWEPEENILDPRLLVAFQNRERQEQLIGYRKRGPKPKH  
LLLQVPSFARRSSVLSDLQEVSQVEDYQPKATSDLVQSQYQLNSKKHHYPQPNPKDKQGEARINGKKKHYYQLNSKK  
HHHYQPNPKMYDSLYQRVKETKVPELTDKEWNLSPALQQKWIQDKDSGCLSKVRNINMGLKKLPKLNGEADLNMTNS  
DAKEDKAPPNGKSSKLKIVKNKNKNGRIVIVMSKYMENGTQAAKIKEGTPDSEKRQALDCKSCGTDESTKIKHTKK  
QSLVKVIKKDSKAESACFRLSNGLSSCGDNPKKACSI VFEPNNLKKPGNTGDYVSNEQPLQLTTKTSLTTPFEKSD  
QRGTQSTQYGPITFPQKRCYSEPDSDSREAKRFLSSQSIAPNTDLSHSCNGTTHFDDHQHNGGHDFFIILDSNQDEPI  
DLSCVRSREERKIPTHSQIGNSIPTVKA AVSTPEQVEKEMKKS VRSFTPFLGNIIITDVTANCLTVTFKEYVTV

>Srh\_LOC107758118

MDLPAVGEHVFAVEGIEKKRLRKGRIEYLVKWRGWSAKYNTWEPEENILDPRLLVAFQNRERQEQQMGYRKRGPKSKH  
PLVQLPAFARRSSILGLEDTSLEENQPKAEPLQIHRSWPQHYQLNSKKHHQYQPSCKEISVEQHVS GKKKHFFYQLN  
SKLHHHYQPDPKMYDTPLTGPKVKVQDP SNKGWNLPPALQQKWIRNKDTGCLSKVKDLSIELKSLPDNANKAERALK  
TSAKEFALPNGIGSKMKI IKNNKNGRIVIVMSKYMDKGVHSSKVKNKDV SQVEAQHNEESTLNNTDNPSDGETSAGR  
ENGSAENTSTFSSSSECIHKNSIKKAE LPKDTPTETEQIVIDLCDQPNSEKAAPAHTDTGLNHRKRNLSEPNEDVRTC  
KQFFSSRSISAPNTVLSSPQREP INLHYRGLADRAYSYDFSDTIPEEPIDLSCGP TKTLKQFP TAEKVSGSSAPVEK  
TNSHVKPFVGNVIITDITTNCLTVTFKEYVQG

>Srh\_LOC107736694\*

VMSKYMDKGVHSSKVKNKDVSEVETQHNEEPTLNKTDNLSDGETSEGLENGAVENTNTFSSECVHENA IKKVELPKD  
TPTETEQTVMYICDQPNSSPMEAEKAPPSHMDTKLNHRKRNLSEPNEDVRNCKQFFSSRSISAPNTVLSSPQREPIDL  
HYRGLTNRAYSYDFSDTIPEEPIDLSCGP TKTLQQFP TAEKVSGSLAQAEKTNNHFKPFVGNVIITDITTNCLTVTF  
KEYVQG

>Srh\_LOC107728779\*

MDLPAVGEHVFAVEGIEKKRLRKGRIEYLVKWRGWSAKYNTWEPEENILDPRLLVAFQNRERQEQQMGYRKRGPKPKH  
PLVQLPAFARRSSILGLEDTSLEENQPKVDPLQLHCPRPQHYQLNSKKHHQYQPSCKEISVEQHVS VKKKHFFYQLN  
SKLHHHYQPDPKMYDTPLTGPKVKVQDPSSKVVNLPALQQKWIQNKDTACL SKVKDLSIEHKGLPDNANKSERALK  
TRAKEFAFPNGISSKMKI IKNNKNGRIVIVMSKYMDKGVHSSKVKNKDVSEVETQHNEEPTLNKTDNLSDGETSEGL  
ENGAVENTNTKGTRGKHS

>Srh\_LOC107710010

MELPTAGEHVFAVESIEKKRIRKGRCEYLVKWRGWSPKYNTWEPEENILDPRLLVAFQNRERQEQLMGYRKRGPKPKH  
LLLQVPSFARRSSVLTDLQEVSQGEDNQSKTSDLVQSQYQLNSKKHHSYQLNPKDKQGEARINGGKKKHYYQLNSKK  
HHHYQPNPKMYDSLYQRVKETKVPELADKEWNLSPALQQKWVQSKDSECLSKVRNITMELKKLPKLNGGTDLNMNTNS  
DAKEDKAPPNGISSKLKIVKNKNKNGRIVIVMSKYMENGTQAAKIKKGTA DSEKRQAQDCKSCGTDESTKIKHTKK  
QSLVKVIKKDSKAESACFRLSNGLSSCGDNPKKTC SI VFEPNNSSKKPGSTGDYVSNEQPLQLTNKTSLTTPVIEKSD  
QKGTQSTQYGPLTLPRKRCYSEPDSDSGEAKRLLISQSIAPNTDLSHSCNGTTHFNHQHSGGHDFFIILDSNQDEPI  
DLSCVRLREERKNPTHSQIGNSIPTGKA AVSAPEQVEKEMKKS VRSFTPFLGNIIITDVTANCLTVTFKEYVTV

>Srh\_LOC107720374

MEVSAVGEQVFPAEAILKSRVRKGRIEYLVKWKGWALKHSTWEPEENILDDRLLITAFEQKERQEELYGPKKRGPCKPN  
FVLKVARAQAGDRPRSNTQRTPPRTTAKPPASSSSASASSSSSFSTAPT PRVHSLAAAHKLKDDIHRCHMSRRPLPRPD  
PLGDPTGSTSSSRPPISPFSETVRILNRKVKPREVKRGRIILNLNVIDKSENSGVTSRRSPQS FAGRTKIPSRNRIIG  
KKQDMFYRPFQHPMKMLGFP MYGQPFGLHPCGSMSSMANEESNGANRRGNGRGKSCDSHSSANAQKFQYQPPSPSP  
SFSENNSSPSLQKQPTQPEAPTSPTKLD SAASSSRSDASQPPPKSSAPFLSSPSYSSSLSSSLEDEDQGSPLAT  
SRGRKRKL RHRTQVGQASVCQVSDRTTTPHPEENREPKEGD PDWNPEMAPSCTNVVVDVTTNLLTVTIKEFCHS GAG  
SEPSSPCQADNPPCPTTAAS

>Srh\_LOC107717667

MELSAVGERVFAAEAILKSRVRKGRIEYLLKWKGWALKHSTWEPEENILDDRLLITAFEKKERQEELYGPKKRGPCKPN  
FVLKARAQAGDKPRSNTQRTPPRTTAKPPASSSSASAAPQPSSSSYNTAPT PRVHSLAAAHKLKDDIHRCHMSR  
RPLPRPDPLGDPTGTSSSRPPISPFSETVRILNRVKPREVKRGRIILNLKVIDKSQIPSRNRIIGKKHGDMPYRPF  
QHPMKMLG LPMYQPFGLNPCGSMSSMANEGSNTGVNRRGGGCCDSHSSANAQKFQYQPPSPSSSSGSNNSSPSQK  
QVTQPEAPTKLDSAASSSRSDASQPHPKSSAPFLSPSPSYSSSSLEGENQGSPNLVTSRGGKRKL RHRTQVGRASVC  
QVSDRNTAPLPEENRVPEKGD PDWHPEMAPSCANVVVDVTTNLLTVTIKEFCHS GAGSEPSSPCQADNPPCPTTAAS

>Srh\_LOC107710048

MELSAAGDRVFAAEAIMKRRIRKGRMEYLVKWKGWA IKYSTWEPEENILDERLVAAFEQKERQEEMYGPKKRGPCKPKT  
LLLKSRAQVAETSSRVPELKHTRPQQHSLPPPSAAPSYP TAPSNAKLQSGAAQPKLKKDIHRCHRMARRPLPRPDQ  
TVSPSGPFSSRPTVS PFSETVRILNRKVKPREVKKGRVILNLKVVDKAGNGGVANSRRTHVPSAQQSHFGRQKIPSRN  
RVIGKNRRFGELSYRGIQTPIRSSGFVFGKLFDSHSLNNAENQTQSGESRNNTTNNLSSSQSSKVDASKGQTLDEL P  
PSNSSSEVSDGEPSPSPQTQSQHSSLQPKSSATKAPDPTLHKLSAQVPVPSKNSLGLSALPSSPMFSSSSSASSSSSED S



ERILDLSVPHEMDRRLRRRHFPFSGRHPLKVPEVPVSEEPSEEEEDV DWHPDMTSQCANVVVTDITANLLTVTIKEFCH  
PPSATPPPCYPKNISAQHDTKQPKHHPKKT

>Srh\_LOC107740604

MELSAAGDRVFAAEAILKRRIRKGRMEYLVKWKGWAIKYSTWEPEENILDERLVAAFEQKEREQEMYGPKKRGPKPKT  
LLLKSRAQVAETSSRVPEFKHTRPQQHSLKPPPSAAPSYPPTAPSNAKLQSGTAQPKLKDIHRCHRMARRPLPRPDQ  
TVGPSSPFSSRPTVSPFSETVRILNRKVKPREVKKGRVILNLKVVDKAGNGGVANSRRTHVPSTQQSHFGRQKIPSRN  
RVIGKNRRFGEVSYRGIQPTIRSSGFVFGNLFDSHLSNAENQTQSGESRNNTTNNLSSSQSSKMDVSKGQTLDELFP  
PSNSSEVSDGEPSPFPQTQSQHSSLPKASATKAQDPALHKLSAQPVASKNSSGPSALPSSPMFSSSSSASSSEDN  
EHILDLSVPHEMDRRLRRRHFPFSGRHPLKVPEVPVSEEPSEEEED LDWHPDMTSQCANVVVTDITANLLTVTIKEFCH  
PPSATPPPCYPKNISAQHDTKQPKQHPNKT

>Srh\_LOC107734182

MELSAIGEQQFAVESI IKKRVKRGHVEYLLKWKGWPPKYSTWEPEEHILDPRLVLTYEEKEQRERSVRWRKRGPKPKR  
LFMQRNIYAMDLSAHKDETEKSSTHPLSLDPRFQSTGACIYQRLTHHKKKKKASRETSEEWDREDDDDDDDEGVM  
EEEEEEEEEDTRQGGTKTGSNTLDKRVRRGRWSPTTGSEAMTISPLP EDWSPVMGPPEEVIVTDITINSLTVTFREALV  
ARGFFRSWEME I

>Srh\_LOC107709653

MELSAIGEQQFAVESI IKKRVKRGHVEYLLKWKGWPPKYSTWEPEEHILDPRLVLTYEEKEERERSVRWRKRGPKPKR  
LFMQRSIYAMDLSAHKDETEKSSAHLPLSLDPRFQSTGACIYQRLTHHKKKKKTSRETSEEWDREEDDDDEGVMEE  
EEEEEDTRGETKTGSNTLNKHVRRGHWSPTTESEAMTISPLP EDWSPVMGPPEEVIVTDITINSLTVTFREALVARG  
FFRSWEME I

>Srh\_LOC107748788

MNMEISSIGEQQFAVESITKKRIRKGNVEYLLKWKQGWPPKYSTWEPEDNILDPRVLAYEEKEEKERALAYKRKGLRP  
RQVILRNLYPMDLRSKHKVLGKSTHRIPLTRSMGTEIDQNGRRRCRIEKRKNRPCRSKLMNDIKPFQQPRRHPLLP  
KDSEKEWDGDEEDEQKKAKKMRTNEENTTEVHQDIPSGQEMSEGYNSSAEHEAVITIKETENCSSIFDHAEKPREDT  
GPVLGATVNSTITNTQENEPVTNTAGDEDSVRVSHDTTNTDQSLHNSTKSGAEQGVFDKVPDRPSVIEVHSSAKCRQD  
EVSERGELDRSETKEKEGMDAVVTAECTTTLQVPIDQLQTPTTTAVHPGKVIVTQVTINTLTVTTFKEAMSAEGFFSGY  
GL

>Srh\_LOC107723608

MELSSIGEQQFAVESITKKRIRKGNVEYLLKWKQGWAPKYSTWEPEDNILDPRVLAYEEKEEKDRALAYKRKGLRPRQ  
VILRSIYPMDLRSKHKVPDKPTPRIRLSLTRSMGTEIDQNGRRYRPIEKYKNRHCRSKLVNDIKPSQYSLPAKDSEKE  
WDEDEDEQENKVKMRENEEKTTEVHQDIPSSQETTEGYSSSAEAEAVIIKESENCSSIIDHAEKPSEDTSQVLGA  
TENSTITNTQENEPVTNTTGGEDSVRVSHDTTNTDQSLHSTESGAKQVVDQVQNRPSVIEVHSSTKCRPEEVRESGE  
VDHSEAKEKEGMDAEITAERTLLQVPIDQSQTPSTTTVHPGKVIVTQVTINSLTVTFKEAMSAEGFFSGDGLV

>Srh\_LOC107758117

MELSAVGERVFAAEESI IKRIRRRGRMEYLVKWKGWSQKYSTWEPEENILDERLFAAFEEREREREMYGPKKRGPKPET  
FLMKAKAKAGKNYEFREMSRDLHVSFPVAEPVTPRAREGLRTVVPTIFPPSTINRGESVRVRPPDLERDPLTHGT  
PVQRPLDFASSPKKRGPKPKLRPGGSSAEGVKRKADEPLSYRPSKTERSGETSSCDVIHLTQKIQAESSHVQKQMGSR  
SSDVKFTHGGTILKSGLVGLGHRKDSSSGAINQSKMKHPPKNHLFRSTDQAREQLSLSFVDETDQSWLPCLKNMEKI  
IVTDVTSNSLTVTIKESSTDKGFFKENR

>srh\_LOC107728583

MELSAVGERVFAAEESI IKRIRRRGRMEYLVKWKGWSQKYSTWEPEENILDERLFAAFEEREREREMYGPKKRGPKPET  
FLMKAKAKAGKNCEFRREISRDLHVSFPVAEPVTPRAREGLRTVVPTIFPPSTINRGESVRVRPPVSERDPLMHGM  
LVQRPLDFASSPKKRGPKPKLRPGGSSTEGVKRKADEPLSYRPSKTERSGETSNCDVIHLTQKFQAESSHVQKQMGSR  
SSDVKFTHGGNILKAGLVGLGHRKDSPSGAIKQSKMKHPPKSNLFRSTDQTREQLSLSFVDETDQSWLPCLKNMEKI  
VVDVTSNSLTVTIKESSTDKGFFKENR

>Srh\_LOC107710282

MELSAVGERVFAAEESI IKRIRRRGRMEYLVKWKGWSPKYSTWEPEENILDSRLFVAFEEREREREIFGPKKRGPKLKT  
FLLKAQTKAKASYEFRNESFRGITYPSEPVVTPRAREGLRAVPSIFPPSTVNRGESVRIPPPEPREHRSPHSRPR  
STDAFTLAPKKRGRPKLRFTDGYTSSLHPEHLKRAAETMASIPSKMAKLGLGEEEEERCSEISGRIKISHKHMDATY  
SHKQNRVPSRSTQHISPEWSLHSSRVSADLQGRNNPQTSHFHHKHLKYHSKRRTFEHADSTSRHPSLIAKIPVSRI  
FGEPEEGDAWRPFSNVEKVIVTDVTSNFLTVTIKESSTDKGFFKDKR

>Srh\_LOC107710028

MELSAVGERVFAAEESI IKRIRRRGRMEYLVKWKGWSPKYSTWEPEENILDSRLFVAFEEREREREIFGPKKRGPKLKT  
FLLKAQAKEKASYGFRNESSRGIAYPSELLVTPRAREGLRSVVPTIFPPSTVNRGESVRIPPPEPREHRSPHSRPR  
STDAFTLTTPKKRGRPKLHFTDGYTSSLRPEHSKRAAETMASIPSKMAKLGLGEEEEERCSEISGRIKISHKHMDATY  
SHKQNRVPSRSTQHISPEWSLHSSRVSADLQGHRTNPQTSHFHLKHLKHSKRRTFEHGDSTSRQPSLIAKIPVSRI  
FGEPEEGDAWRPTFCNVEKVIVTDVTSNFLTVTIKESSTDKGFFKDKR

>San\_LOC107667890  
MEVSTVGEQVFPAEAILKSRVRKGGQIEYLVKWKGWALKHSTWEPEENILDDRILMAFEQKXRQOELYGPKKRGPKPKN  
FVLKARAQAGDRPSSNTRTPPRTAKPPASSSSASSSSSFSTAPTRVHSLAAAHKKLDIHRCHRMSRRPLRPD  
PLGDPSTSTSSSRPPISPFSETVRIILNRRVKPREVKRGRIILNLNVIDKSENGSVTSRRSPQSFAGRAKIPSRNRIIG  
KKQDMPYRPFQHPMKMLGPFMYGQFFGLHPCGSMSSVANEESNTANFGPSSNCDSHSSANAQKFQYQPPSPSSFS  
GNNSSPSLQOKEPTPEATSPYTKLDSAAASSRRDASOPPKKSSAGFLPSSPSYSSLSLSSLEDEOGSPNLATSRG

RKRKLRHRTQVGRASVCQVSDRRTTTPHPEENREPKEGD PDWNPEMAPSCTNVVVDVTTNLLTVTIKEFCHS GAGSEP  
SSPCLADNPCCPTTAAS

>San\_LOC107704552

MELSAVGER VFAAEAILKSRVRKGRIEYLLKWKGWALKHSTWEPEGNILDRLITAFEQKER QEELYGPKKRGPKPKN  
FVLKARAQAGDRPRSSNTQRTTPRRTAKPPASSSSASAAPPPSSSSSYNTAPTTPRVHSLAAAHKKKKDIHRCHMR  
RPLPRPDPLGDPTGTTSSSRPPIPSFSETVRIILNRVKPREVKRGRIILNLKVIDKSQIPSRNRIIGKKHGDMPYRPF  
QHMKMLGFPYMGQPFGLNPGSMSSMANEGSNTGVNRRGGGCCDSHSSANARKFYQPPSPSSSSSGNNSPSPQE  
QVTQPEAPAKLDSAASSRSQDASQPHPKSSAPFLPSSPSYSSSSLEGENQGSPNLVTSRGGKRLRHRTQVGRASVC  
QVSDRNTAPLPEENRVPEKGD PDWHPPEMAPSCANVVVDVTTNLLTVTIKEFCHS GAGSEPSSPCQADKPPRPTTAAS

>San\_LOC107690738

MELSAAGDR VFAAEAIMKRRVRKGRMEYLVKWKGWAIKYSTWEPEENILDERLVAAFEQKER EQEMYGPKKRGPKPKK  
LLLKSRAQVAETSSRVPEFKHTRPQQHSLKPPPSAAPSYTPAAPSNAKLQSGAAQPKLKKDIHRCHMRARRPLPRPDQ  
TVGSPGPFSSRPTVSPFSETVRIILNRVKPREVKKGRVILNLKVVVDKAGNGGVANSRRTHVPSAQQSHFGRQKIPSRN  
RVIGKNRRFGELSYRGIQTPIRSSGFSVFGKLFDSHSLNNAENQTQSGESRNNNTNDLSSSQSSKVDASKGQTLDEL  
PSNSSEVSDGEPSPFPQTQSQHSSLQPKSSATKAPDPTLHKLSAQPVPSKNSLGLSALPSSPMFSSSSSASSSEDS  
ERILDLVSPHEMDRRLRRRHPFSGRHPLKVPEVPVSEEPSEEEED LDWHPDMSQCANVVVDITANLLTVTIKEFCH  
PPSATPPPCYPKNISAQHDTKQPKHHPNKT

>San\_LOC107662367

MELSAAGDR VFAAEAILKRRIRKGRMEYLVKWKGWAIKYSTWEPEENILDERLVAAFEQKER EQEMYGPKKRGPKPKT  
LLLKSRAQVAETSSRVPEFKHTRPQQHSLKPPPSAAPSYTPTAPSNAKLQSGTAQPKLKKDIHRCHMRARRPLPRPDQ  
TVGSPGPFSSRPTVSPFSETVRIILNRVKPREVKKGRVILNLKVVVDKAGNGGVANSRRTHMPSTQQSHFGRQKIPSRN  
RVIGKNRRFGVSYRGIQPTIRSSGFPVFGKLYDSHLSNAENQTQSGESRNNNTNNLSSSQNSKVDVSKGQTLDEL  
PSNSSEVSDGEPSPFPQTQSQHSSLPPKASATKAQDPALHKLSAQPVASKNSSGSPALPSSPMFSSSSSASSSEDN  
EHILDLSVPHEMDRRLRRRHPFSGRHPLKVPEVPVSEEPSEEEED LDWRPDMTSQCANVVVDITANLLTVTIKEFCH  
PPSATPPPCYPKNISAQHDTKQPKHHPNKT

>San\_LOC107695130

MNMELSSIGE QVFAVESITKKRIRKGNVEYLLKQGWPPKYSTWEPEDNILDPRVLVAYEEKEE KERALAYKRKGLRP  
RQVILRNLYPMDLRSKHKVLGKPTQRIRLSLTRSMGTEIDQNGRRCQRIEKRKNRQCRSKLMNDIKPFQPPRRHPLLP  
KDSEKEWDGDEEDEQKKVKMMRTNEENTTEVHQDIPSGQEMSEGYNSSAEHEAVITIKETENCSSFFDHAEKPREDT  
GPVLGATVNSTITNTQENEPVTNTAGDEDSVRVSHDTTNTDQSLHNSKSGAEQGVFDKVPDRPLVIEVNSSAKCRQD  
KVSEGERGELDRSEAKEKEGMDAVVTAECTTTLQVPID QLQTPTTTAVHPGKVIVTQVTINTLTVTTFKEAMSA EGFFSGY  
GL

>San\_LOC107672137

MNMELSSIGE QVFAVESITKKRIRKGNVEYLLKQGWAPKYSTWEPEDNILDPRVLVAYEEKEE KDRALAYKRKGLRP  
RRVILRSIYPMDLRSKHKVPDKPTPRIRLSLTRSMGTEIDQNGRRYRPIEKYKNRHCRSKLMNDIKPSQYSLPAKDSE  
KEWDEDEDEQENKVKMMRENEETTEVHQDIPSSQETTEGYSSSAEAEAVITIKETENCSSIIDHAEKPSEDTSQVL  
GATENSTITNTQENEPVTNTTGGEDSVRVSHDTTNTDQSLHGTEGAKQVVFQVQNRPSVIEVHSSSTKHRQEEVSES  
GEVDHSEAKEKEGMDAEITAERTLLQVPID QSETPSTTTVHPGKVIVTQVTINSLTTFKEAMSA EGFFSGDGLV

>San\_LOC107692056

MELSAIGE QVFAVESI IKKRVKRGHVEYLLKWKGWPPKYSTWEPEEHILDPRVLVLYEEKEE RERSVRWRKRGPKPKR  
LFMQRNIYAMDLSAHKDEKSSAHLPLSLDPRFQSTGACIYQRLTHHKKKKKTSRKTSEEEWDRREEEDDDDDDDDEG  
VMEEEEEEEEEEDTRQGGTKTGSNTLNKHVRGRWSPTTESEAMTISPLP EDWSPVMGPPEEVIVTDITINSLTTFRE  
ALVARGFFRSWEME I

>San\_LOC107660863

MELSAIGE QVFAVESI IKKRVKRGHVEYLLKWKGWPPKYSTWEPEEHILDPRVLVLYEEKEE RERSVRWRKRGPKPKR  
LFMQRNIYAMDLSAHKDEKSSVHLPLSLDPRFQSTGACIYQRLTHHKKKKKASRETSEEEWDRREEEDDDDDDDDDDD  
EGVMEEEEEEEEEKEEDTRQGGTKTGSNTLNKRVRSGRWSPTTGSEAMTISPLP EDWSPVMGPPEEVIVTDITINSLTTF  
FREALVARGFFRSWEME I

>San\_Cbx8 (Gene ID: 107701205)

MELSAVGER VFAAESI IKRRIRGRMEYLVKWKGWSPKYSTWEPEENILDSRLFVAFEEERERE IFGPKKRGPKLKT  
FLLKAQTKAKASYFRNESFRGITYPSEPVVTPRAREGLRAVVPISFPSTVNRGESVRIPPEPREHRSPHSRPS  
STDAFTLAPKKRGRPKLRFDTGYTSSLHPEHLKRAAETMASIPSKMAKLGLGEEEEERCSEISGRIKISHKHMDATY  
SHKQNRVVP SRSTQHSPEWSLHSSRV SADLQGRNNPQTSFHFKHLKYH SKRRTFEHADSTSRHPSLIAKIPVSRI  
FGEPEEG DAWRPSFSNVEKVIIVTDVTSNFLTVTIKESSTD KGGFFKDKR

>San\_LOC107669528

MELSAVGER VFAAESI IKRRIRGRMEYLVKWKGWSPKYSTWEPEENILDSRLFVAFEEERERE IFGPKKRGPKLKT  
FLLKAQAKEKASYGRNESSRGIAYPSEPLVTPRAREGLRSVVTIFFPSTVNRGESVRIPPEPREHRSPHSRPS  
STDAFTLTPKKRGRPKLRFDTGYTSSLHPEHSKRAAETMASIPSKMAKLGLGEEEEERCSEISGRIKISHKHMDATY

SHKQNRVVPPEWSLHSSSVSADLQGHRTNPQTSHFHHKHLKHYSKRRTFERGDSTSRQPSLIAKIPVSRIIFGEPEEGDA  
WRPTFCNVEKVIVTDVTSNFLTVTIKESSTDKGFFKDNR

>San\_LOC107670683

MELSAVGERVFAAESIIKRRIRRGMEYLVKWKGSQKYSTWEPEENILDERLFAAFEEREREREMYGPKKRGPKPET  
FLMKAKAKAGKNCEFRREMSQDLHVSFPVAEPVTPRAREGLRAVVPTIFPPSTINRGESVRVRPPVSERDPLMHGM  
LVQRPDLDFASSPKKRGPKPKLRPGGSSTEGVKRADEPLSYRPSKTERSGETSNCDVIHLTQKFQAESSHVKKQMGSR  
SSDVKFTHGGNILKAGLGVLEHRRKDDSPSGAIKHSKMKHPPKSNLFRSTDQTREQLSLSFVDETDQSWLPCLKNMEKI  
VVDVTSNSLTVTIKESSTDKGFFKENR

>San\_LOC107689994

MELSAVGERVFAAESIIKRRIRRGMEYLVKWKGSQKYSTWEPEENILDERLFAAFEEREREREMYGPKKRGPKPET  
FLMKAKAKAGKNYEFREMSRDLHVSFPVAEPVTPRAREGLRTVVPTIFPPSTINRGESVRVRPPDLERDALTHGI  
QRPLDFASSPKKRGPKPKLRPGGSSAEGVKRADEPLSYRPSKTERSGETSNCDGIHLTQKFQAESSHVKKQMGSRSS  
DVKFTHGGTILKAGLGVLGHRKDDSSGAISQSKMKHPSKNHLFRSTGQAREQLSLSFVDETDQSWLPCLKNMEKIIIV  
TDVTSNSLTVTIKESSTDKGFFKENR

>San\_LOC107661146\*

MECCSCAPPTRHPQGGTGRPSQEVRSRLHPRTMGLALHKRPSAPVQEVESQAGCPRGERDQEEAVNESPPPIIV  
DGEEAYQVQEILDSRRRGRLQLYLIDWEGYGPEERSWVNSQDILDPSLTTEFHRTHPHKPA PRSRGRPRRSPPFRS  
RSEVVF

>San\_LOC107669533\*

MRLPCKKLSPRYVGPFTIIKQINPVTYQLQLPSQYKIHSSFHVSLKPYHPPVSVSTPEGPTTEPPLI QEDGAIYK  
VNEILDSRRRGILEYLV DWEGYGPEERSWVPRVDILDPTLLEAFHSTHPRPGPRRRGRPPRHRGHRPLGEGRGWG  
TVTDQPGSSTTQSQRTLSPEY

>Cva\_LOC107089316

MEELSAVGEQVFDACILNKRRLRKGLFLVKWRGWSSKHNSWEPQENILDPRLLAAFNKKEQEKELLMLKRRKRPRG  
RPRKIENIPEPQKSSSSSASSSTSSDSSSSCTSSSSSSSDEDEGDDVKQASPTVRPRELHPVPQKKAQIVMAKQE  
PPRRSRKPLPSDAKDFHQNKQGRKMVKTTKETELPGAIIKKPVHPASFTFMGFHRSSAKDPVGGQYRSPLSPSAVKNP  
ISTAGSGRPSVQSSSLPLNKSQNRNTSEGKVISISSMNSGASLDLKAACKSKGVAALNLTSKHPVQGSFQRTLSPP  
GGQKKPQPTGSTAQRGPTTKTAPSPPKNASSNQSSQLPLNLQNKQLQVSDAPGSGVTAASGPRNPVVPARKTTATQ  
NPETGAVKSPVTSGRSPARKPQAGDKFRGVNEIQNAKVQNRLDKSYTEIQNPQERTATKGSKKAKMTDMSTGEESS  
SDSDRDSSYAGQGHVPGGHNQDWKPTRSLIEHVFTDVTANLVTVTVKESPTS VGFFFSIRNY

>Cva\_LOC107082907

MNTDSLPEALMISFYSIETHNSWEPEENILDPRLLAAFHKREQERELLFQKKGKRPRGRPRKILPPEPTATKDSSSSS  
SSSSGLSSEPSSSSEDEDHIKSKSPSRVHPVPQKRPQILLAKPDPPRKKKRGRKPLHPDLKALRQGKSLPPPPPPPP  
RHHQPIRSPRDDLPGVKKPLQPASFTYPGLSRSSREEGSSSSFSQSSASKPGSLSCIWTGRSLSSSSSSSSSHNKG  
ASQKPELRSFSFETGSSRAEAFKASPVKSAGGLAPSLHSGFGGHPIAAQRPLAHRQDQGTGPVQHKQNSGFSKQ  
NPSTKERPSQALNLRALNLQSVGKLPAAAGGLQGGAAGGQRS GPALESGRSRSQPSAAGRQEERKHGLSLTELSTGDS  
DDTSSSESEHDAPSLPDDSRPGVGGNATESDTE TDWRPARSLMEHVFTDVTANFITVTVKESPTS VGFFSSRNH

>Cva\_Cbx4 (Gene ID: 107085514)

MELPAAGEHVFAVESIEKKRSRKGRVEYLVKWRGWSRYNTWEPEENILDPRLLDADFQDRERQEQLMGYRKRGPKPKH  
LLVQVPSFAKRSNFLANLQEALEDSCQKSSPIQMIRPQSQQFQLNNKKLHQYQPLSREHEAEQQPNGKFFYELNS  
KKHHQYQPDLSQEPVFVNKPRDIQAPELANKGYNLPAVLQKQWRDKDSGCLTKVKDITMELKKLPADLNGQKEPERI  
KPKEDTSPHPNGVSSSKLKIVKNKNKNGRIVIVMSKYMENGIQSAKTKHGDSDGAERPLQADSSMERHLAKMKLVKK  
LGLMNGFPKEPKDNPTPPSPGINDCCKEKLSTQTDRTVAEQDKPTAVGGEGQFPQHQLQLTTKPDLLHVPPERGA  
LDFKGTQNLHGLKRHLTDADAEEHGCSKRLISNKSISVLNTIPPPSQSPAFDQNLSPALLQDYGADQEEPMDL SI  
VKS RVPSSVFCETEPETQTEEHVHSHDTQTQTDTKTESQTETHSPSVEERVDSVSGSPHQA KKEEA FPSFQPSLGNIV  
ITDITANCLTVTFKEYITA

>Cva\_LOC107092841

MELPAAGEHVFAVEGIEKKRIKKGKIEYLVKWRGWSPKYNTWEPEENILDPRLLVAFQHRERQEQMMGYRKRGPKPKH  
LLLQVPSFARRSTIPAGFQETANEADGTLKSDSTQVQRSQPQQYQLNSKKHHQYQPSQEVPTDALSNSKKKFIYQLN  
SKHHHHYEPDPHMYDAQVSRLEKVVKQEPASNLANPGWTLPLALQQKWIHNKDTGCLSKVKELAVEVRKPVKEAQSE  
NALKPNPKEASLPTAVSSKMKIIKNKNKNGRIVIVMSKYMDGNKVHGA KDKHRESSRDEKTHGIKTSENNPAPMTKID  
EHPENGIPKEICKGSSLSVAEHLKCSPKDRQFSKPSPTAE EYNTAVARGQADLPEGLSLQLTASSPQTSWTADTAI  
PTPTAIDQIRIPSPFCNRKRKLSDPIDERNVQGIYLASRSLSVPAATMAPPDQKPMDLHCSTARHSGMCTTYQEVGSQ  
EEMDLSCPKNKRPEVEEAQPPAKPEPAIEDTSSAVNNTQKSLDKSPEEP AKQISPFMGNIITDITNSLTVTTFKEY  
VSE

>Cva\_Cbx6 (Gene ID: 107090076)

MELSAAGDRIFA AEAILKRRVRKGRIEYLVKWKGWAMKHSTWEPEENILDDRILILGFEQKEREREMHGPKKRGPKPKN  
LAMKDRGQKGESSRAFFSRQTAPRSSSTSNRAAPSSSASSAAPH TLPLSSSPAPSPKLNLAATHKLKDIHRC

HRMSRRPLPRSHPVGPAFSSSSGFPSPRMHVSPFSETVRILNRRVKPREVKRGRIILNLKVIDKPGRGGAAGSRNGQS  
GRQNIPISRNRIIGRKGDAPYRPFQPPPLKMLGFPYKGFPLQCGRPMFSHSQTGSCSSTGARDTNSSSSQCAAPPSS  
APSNSSSNAAKRPQAAEASKDSESSTAVPETQKPSASSCSEANDKVPASSSPTSSLEDQDEDDMDCSQASEEGRSPG  
HHKAKPQSPSAVSSATPDQPTAPADPQVRVPTEGD**PDWHPEMAPSCKDVVVTDTVTTNLVTVTIKEFPT**PASGPASPAD  
ENASTPPPAASSENAAIPKP

>Cva\_LOC107092875

MELSAIGE**QVFAVESILKRLRKGVEYLLKWKGWPPKYSTWEPEEHILDRRLVQAFEDKEE**KERVVGHRRKGSKSKR  
VLLQNTVYTMDLRSAHKIPAKPPPRRLRLSLTRSMSTDVEQACRRQARRSRQRVTKVYSKHSKSFHGQKMKLGLMEKDW  
SPEEWEEEEENSADSEHREEEEEAAEMREAVFSGHRNADKWSTDGAAESE**QLWRPVMAPGEVTVTDVTLNSLTVTF**  
**RESRVA**KGFFQDWGLEVVDQVGEGGERATWDP

>Cva\_LOC107093081

MELSSIGE**QVFAVESITKKRIRKGVHVEYLLKWKQGWPPENSTWEPEDNILDPLLVMAYEANQE**KLRSLSRFKKGLRPRK  
LVLNIFGMDLRSAHKDDEKPPPRRLRLSLTRSMSTDVEQACRRQARRSRQRVTKVYSKHSKSFHGQKMKLGLMEKDW  
GGTSEEEKNGCDSNTEERCGDSLYGQSECSSTPFLEEDMDMEEEKNVSPDLWPNGVIFATIPNHTNALEQSKDNTL  
ASEAKPEGLVPPSGRSHSAEAKGVEACSEPPKEEKNATSVIVRFQSGKTAGEAVSPHESELKKNARSNDQSVIV  
TASER**PKGPT**APRPGKIVITNVTVNSLTVTFKEATGA**EGFF**NNGF

>Cva\_LOC107092814

MELSAVGES**VFAAESI**KRRIRRGWEYLVKWKGSQKYSTWEPEENILDERLFAAFEERERERELFGPKKRGPKPET  
FLLKAKAKAKEKTYDFRRETTPRSIQVSYPIPEPVITPRAREGLRAVVPTIFPPSAINRGESVPIRSPEERRPRPAMT  
EALFDQESGRFPRKRGRKPKFHPHYDPHPSISAEPVSKRSRSLDEQSITSRRLHYHGETSEHSLQLTKRFQEETI  
TPKPSSEQRYAGMSYTCALSPGMRKSDQEGHRTYSLNRMHFPKHSELKRSAEELPSQPDPSAPSA**PTWT**PCFTNWD**TV**  
**TVTDVTMNL**TVT**TIRE**SS**TA**KGFFKDKR

>Cva\_LOC107085518

MELSAVGES**VFAAESI**KRRIRKGSIEYLVKWKGSQKYSTWEPEENILDSRLFAAFEQERERERELYGPKKRGPKPKT  
FLLKAQAKVKTKSYEFSEAVRGMHITYPTPEPVITPRAREGLRAVVPTIFPPSTINRGESVRVIPHEHQSPQQSVS  
DRLVQTPKKRGPCKPRFIGDGRSPVLETSKRIAEVGGQGPYKLSKFHGDDEMRLQKLSHRHSEDHPRSSKHHYQHH  
YHHHLAQKLSSGGSYKRLSHHSTHPRHTKDRCSYLAQAQVKHHQKTNQSRSGAAEFQMEKPYFLDRQSPTKLDDDD  
QEE**TTWR**PSLS**DVEK**VLVDVTANFLTVTIKES**STS**KGFFKDKR

>Xma\_LOC102229509

MEGVTVG**QVFDAECILSKRQRKGFEYLVKWRGWSSKHNSWEPEENILDPRLLAAFHKREQ**ERELLFQKK**KRPRGRF**  
**RKILPF**PADTKDSSHSSSSSFGLSSEPSSSSSEEDDDHVKAKQSPRIHPVPQKRPQILLAKPDPPH**KKRGRKPLHPD**  
**LKAL**RQGKSLSPPRHHQPIRSRDEPRPGVKKPLQASFTYPGLSRSSREEGASSFSQSSTSKPGSLNCVWAGRSLS  
ASSSHNKGSPSQKPSSELRAVSETGSGVRADAFKGSQAQKPAPLGLHSSFGGHPIAAQRPLTHRRHDNVGGQSGVLVQH  
QQNSSFSKQSPSPTPRERTSQUALNLRALNLQSVGKLPSSGGLQGGSRSTGVSKGTTAGGQSRSGPAEPPGRSRTQPA  
GSRQEEHKGSSSQNRNLNELSTGSDSTSSSEHDPSSFPGDTRPSVSSNTAESDTE**TDWR**PARSLMEHVFTDVT  
**ANFITVTVKESPTS**VGFFNSRNH

>Xma\_LOC102223386

MEELSAVG**QVFDAECILNKRLRKGKLEFLVWKWRGWSSKHNSWEPEENILDPRLLAAFNKKEQ**EKELLMLKRR**KRPRG**  
**RPRKIEN**IPEPQKSSTSSSSASSSSSSSSSSSSSSSEDEDEGDDGHAKQASPTVRPRELHPVPQKKAQIVMAKQ  
EPLRKRNRKPLPPEAKEFQQNKGPVKVLTARETDLPGAIKKPVHPASFTFMGFRSSAKDAAPGYPSPPLTQGGTVK  
PATSSPGSGRSSVQTVSLALNKSNIQRNATEGKLSISGGNSGGLDLKAAACKSKGVAALNVNTTKHPVQGTQHTLS  
SPSGPKKPHSTGSAMQRVAGTKAGVSQSKSSSNQGNQPLNLQNKQSQSGDAPGSGTTAALGLRNPVIPARKPTVAQN  
LETNANKSPVSSGRPPARKPQAGGDKLREMKEFQKVLQGRDKSCSEIQNPPARTATKGSKKAKMTDMSTGEESSSDS  
DHDSSYAGQGHVPVAGQ**QD**WKPTRSLIEHVFTDVTANLVTVTVKES**PTS**VGFFSIRNY

>Xma\_Cbx4 (Gene ID: 102230727)

MELPAAGEH**VFAVESIEKKRSRKGVEYLVKWRGWSPRYNTWEPEENILDPRLLDFAQDRER**QEQLMGYRKRGPKPKH  
LLVQMPSFARRSNILANLQEALEGNSCQKSSSIQMICPQAPQFQLNSKKLHHYQPLIRECDPEQQSNGKKFFYELNS  
KKHHHYQPDLLKQHEPVFAKPRDVKAPELSNKGYNLPAVLQQKWVRDKDSGCLTKVKDITMELKKIPADLKGOKEPERV  
KPKEDASTHSGNVSSSKLIVKNKNKNGRIVIVMSKYMENSMQTAKIKSSDSEGAERPLQGAESSMEGRLAEVKLVKK  
LSLINGFSKQPKDNPTVPTSGIKADCCKEKELSPQTERTVMEQDKGAEGQLPQDKPLQLTNKPDELPLPSEREVPDKR  
GIQNGHHGLKRHLSDTDAEEQGLGRFLSYRSISAPNTDSSPSQSFIVDNRNEQQSPALLHNYGYADQEFPMDLSIVKS  
RPTSLVCVGTEPETRAEEPAHPPDDSRQTQADTQTESQTETHNLSEESADIVSDSNHQARKDEAF**PSFQ**PLGNIVIT  
**DITANCLTVTFKEYVTA**

>Xma\_LOC102232224

MELPAAGEH**VFAVEGIEKKRIRKKGIEYLVKWRGWSPKYNTWEPEENILDPRLLVAFQHRER**QEQQMGYRKRGPKPKH  
LLLQVPSFARRSNIPAGFEETVQDTEGTFKLDPVQRQPQHYQLNSKKHHYQPNQSEIPADSLNNSKKKFIYQLNSK  
KHHHYEPDPHMYDAQVSRLEKVVQVEPASKLANPGWNPLPALQQKWIRNKDTGCLSKVKELAVEVRKPVKDAQSENA  
LKPNPKATLPSAVSSKMKI IKNNNNGRIVIVMSKYMDGNKVHGAKDKHRESSRDEKTQSSKTQENNPFGAKMTEH

PENGIPKEICKGSSSVSAEHPLKCSPKDRHFSKPSPTAAEYNTAEVARGQADLPDDLPLQLTASSPPTSWTADTAIPT  
PTAVDQIRIPSPFCDRKRKLSDPVEDRNLGKILLASRSLSVPTAAVTPPQDKPMDLHCSVARRSSMCTMYDANGSQEE  
PMDLSCPKNRRQVEAEVQPPVEAEPVVEDTPPPENTQKSCKEKSPEE **PANKISPFMGNIITDITNSLTVTFKEYVS**  
**F**

>Xma\_Cbx6 (Gene ID: 102234048)

MELSAAGDR **IFAAEAAILKRRVRKGRLEYLVKWKGWAMKHSTWEPEENILDDRLLLGFEQKER**EREMHGPKKRGPKPKN  
VVAKGRGQKAEPSTRASSSRQNTPRSSSTASSRASSSSSAAPNALPFSSSSSSAPAPSPKLNLAATHKLKDIHRC  
HRMSRRPLPRADPTRPAFSSSSGFQSRMHVSPFSETVRILNRRVKPREVKRGRIILNLKVIDKPGRGGGGAAGSRNVQ  
TGRQNIPTSRNRIIGRKGEAPYRPFQPPPLKMLGFPMYKPFGLQCGGPMFHSQTGSSSTTGARHSNSSSSQRLPPS  
SSSSSTSTNVTAKHPQATEASKESKSSKSPETQNASCSEANKILVPPSPSPSLEDQDEADAMDCSEASEARSQCHK  
APSTVSSVAPEQSSLPPESKRVPAEGD **PDWHPEMAPSCKDVVVDVTVTNLTVTVTIKEFPSE**ASGPASPSASVENGSTP  
PPAATSEDSSVPKP

>Xma\_LOC102225821

MELSAIGE **QVFAVESILKKRLRKGNVEYLLKWKGWPPKYSTWEPEEHILDRRLVQAFEDKEE**KDRVIGHRRKSGSKSR  
LLLQNTVYTMDLRSAHKIPAKPPPRRLRLSLTRSLVPDDEEDEDGACVPSRTHRKSQSRRLSLNLQGPSQEAWEESSE  
EEEEENSAEDSEHREESSEAEEMGEGVFNGHRGPDNWSAVGSGSD **KLWRPMPVAPGEVTVTDVTLNALTFTFRESRAAR**  
GFFRDWGLEWVEQVGDGAPQSCWRH

>Xma\_LOC102232562

MELSSIGE **QVFAVESITKKRIRKGTVEYLLKWKQGWPTYEYSTWEPEDNILDPLLVLAYEENQE**KLRSLSFRRKGLRPRK  
LVLRNIFGMDLRSABKDDKAPPRRLRLSLTRSMSTVEQACRRARRRRNRQRTKAFPKHSSNKPIHEQKMKVEPVEK  
DWGGTSEEDKPGCESTTEERREDSLYGQSECSPPFLEEQDMDTEVEEKAASPDMTDEADGRIFETSQRDTNSQNES  
ESEAKPEVVVSPARSDDWVKEVGVEAFSESPTMEKKNATSVIVRVQECGKTTGDAVSVCSDSEPQKDEVRSDNQSVIV  
TAS **DRPKVPYEA PRGKVIVTNVTNCLTVTFKEASCS**DGFFNGC

>Xma\_Cbx8 (Gene ID: 102230986)

MELSAVGER **VFAAESI IKRRIRKGRIEYLVKWKGWSPKYSTWEPEENILDSRLFAAFEQRE**ERELYGPKKRGPKPKT  
FLLKAQAKGKTKSYEFRESEAVRGMHITYPTPEPVFTPRAREGLRAVVPTIFPPSAVNRGESMRVRPSELHLGHQRSS  
LQHSDDSGTVQAPKKRGPKPKPRFVDADFSPVVSEPRKRAEEEEEEEEERHGHKLSKFQGAEEMLRQKLARHS  
ENHKKHHQHHHHYHHHHHTQKVSQHLSHRSLEPHRTTGDSSYLVAHLKHHHKASRGPPTEFFPMEKPYFLDRQSPTR  
FDDSDQD **TAWRPCLSNVEKVLVTDVTANFLTITIKESST**SGFFKDKR

>Xma\_LOC102227807

MELSAVGES **VFAAESI IKRRIRGRWEYLVKWKGWSQKYSTWEPEENILDERLFAAFEERER**ERELFGPKKRGPKPET  
FLLKAKAKAKEKTYEFREAPRGIQVSYPPIEHVITPRAREGLRAVVPTIFPPSAVNRGESVPIRPPEPERRPRPVPL  
EALLDQESRGSPKKRGRKPKLHPHYDPHDASGSSEPAKRSRSLLEEQSIMSRRLHHHGETSDHSLQLTKRFQEETTI  
TPKNSSEQKHAGLSYTCAFSPGERKRDPEGHRTYLSRLDFPQHGLKRSAAERGHQAALVSSQADPTAPSA **PTWTPC**  
**YTNDWDTVTVTDVTMNLTVTITRESSTA**KGFFRD

>Pfo\_LOC103146900

MEELSAVGE **QVFDAECILNKRLRKGLFLVLKWRGWSSKHNSWEPEENILDPRLLAAFNKKEQ**EKELLMLKRR **KRPRG**  
**RPRKIEN**IPEPQKSSTSSSSSSSSSSSSSSSEDEDEGDDSRKQASPTVRPRELHPVPQKKAQIVMAKQ  
EPPRKRNRKPLPPEAKEFQONKGPVKLTAKETDLPGAIKKPVHPASFTFMGFRSSAKDAAAGPYRSPLTQGGAVK  
PAISSPGSGRSSVQTASLALSKSNQSRNATEGKLSIGNSGSLDLKTAACKSKGVAALNVNTTKHPVQGTQHTLSPP  
SGPKPKQSTGSAMQVRVAGTKAGTSQSSKNTSSSQGHQPLNLQSKQSQSGDAPGSGTTAASGLRSPVIPARKPTVAQNL  
EANANKSPVSSGRPPARKPQAGGDKLREMKEFQKVQGRLDKSCSEIQNPARTATKSGSKAKMTDMSTGEESSSDSD  
HDSSYAGQGHVPAGQN **QDWKPTRSLIEHVFTDVTANLTVTVTKESPTS**VGFFFSIRNY

>Pfo\_LOC103147077

MEGVTVGQ **VFDAECILSKRQRKGKFEYLVKWRGWSSKHNSWEPEENILDPRLLAAFHKREQ**ERELLFQKKG **KRPRGRF**  
**RKILPE**PTDTKDSHSSSSSFGLSSEPSSSSSEEDDDDHVKKAKQSPRIHPVPQKRPQILLAKPDPPR **KKRGRKPLHP**  
**DE**KALRQGKSLPSPRRHQPISRPRDEPRGVKKPLQPASFTYPGLSRSSREEGASSFSQGSTSKPGSLNCVWAGRSL  
SASSSHNKGSPSQKPSSELRAVSETGSVRADAFKGSQKPAPLGLHSSFGGHPIAAQRPPLTHRRQDSVGGQSTGLVQ  
HKQQNSSFSKQLPSPTPRERTSQALNLRALNLQSVGLKPGSGGLQGGSRSSTGVGKGTAGGQRSQSGPVTEAGRSRTQP  
AGGSRQEEHKGHPSSQNRNLNELSTGSDSDTSSSESEHDPSSFDDTRPSVSSNAAESDTE **TDWRPARSLMEHVFTD**  
**VTANFITVTVKESPTS**VGFFNSRNH

>Pfo\_Cbx4 (Gene ID: 103133063)

MELPAAGEH **VFAVESIEKKRSRKGRVEYLVKWRGWSPRYNTWEPEENILDPRLLDADFQDRER**QEQLMGYRKRGPKPKH  
LLVQVPSFARRSNILADLQEALEGNSCQKSSSIQMMCQQAQQFQLNSKKLHQYQPLIRECDAEQQSNGKKFFYELNS  
KKHHHYQPDQKQHEAVFAKPRDVKAPELSNKGYNLPAVLQQKWVRDKDSGCLTKVKDITMELKKIPPADLKGQKEPER  
VKPKEDASTHNGVSSSKLIVKNKNKNGRIVIVMSKYMENGMQTAKIKSSDSEGAERQGAESSVERHLAKMKLVKKL  
GLINGFSKQPKDNPTVPSSGIKADCKEKEKELSPQTERTAMERDKGAEGQLPQDKPLQLTNKPDELPLPSEREVDPKTG  
IQNGHHGLKRHLSDTAAEQGLGKRFLSCRSISAPNTDSSPSQSLTVDRNEQQSPALLHDYGYADQEEPMDLSIVKSR



PTSSVCVETEPETRAEEPAHPPDDSRQTQDTQTESQTETHNPSEEEEEADIVPDSNHQARKDEAFPSFQACLGNIVIT  
DITANCLTVTFKEYVTA

>Pfo\_LOC103141632

MELPAAGEHVFAVEGIEKKRIRKGIYLVKWRGWSPKYNTWEPEENILDPRLLVAFQHRERQEQMMGYRKRGPCKPH  
LLLQVPSFARRSNIPAGLEETVQDAEGTFKLDPVQRPQPHYQLNSKKHHQYQPNSEQEIPADALNNSKKKFIYQLNSK  
KHHHYEPDPHMYDAQVSRLEKVVQVETANKLANPGWNLPLALQQKWIRNKDTGCLSKVKELAVEVRKPVKDAQRENA  
LKNPKKEATLPSSVSSKMKIKNKNKNGRIVIVMSKYMDGNKVHGAKDKHRESSREEKTQSSKTQENPPPGAKMTEH  
PENGIPKEICKGSSVSVAEHPLKCSPKDRHFSKPSSTAEYNTVARGQADLPDDLPLQLTASSPPTSWTADTAIPT  
PTAVNQIRIPSPFCRKRKLSDPVEDRNVGKILLASRSLSMPTAAVTPPQDKPMDLHCSVAHHSSTCATYDANGSQEE  
PMDLSCPKNRRRVEAEVQPPVEAEPAVEDTPPVKNDTQTSCEKSPEEPAKKISPFMGNIITDITNSLTVTFKEYVS  
F

>Pfo\_Cbx6 (Gene ID: 103154832)

MELSAAGDRIFAEEAILKRRVRKGRLEYLVKWKGWAMKHSTWEPEENILDDRILGFEQKEREREMHGPKKRGPCKPH  
FVAKGRSQKAEPSTRASSSRQSTPRSSSTTSSRASSSSSSSSSSAAPNALPFSSSSSSSVPAKPKLNSLAATHKLK  
DIHRCHRMSSRRPLPRTPRPAFSSSSSGFQSRMHVSPFSETVRILNRRVKPREVKRGRIILNLKVIDKPRGGGAAGS  
RNVQTRQNIIPSRNRIIGRKGEAPYRPFQPPKMLGFPYMGKPFGLQCGGPMFSHSMGSSSTTGPDRSNSSSSQQA  
PPSSSSSSSTSSNVAKRQSAEASKESKSSKSPETQNASCEANKTPVPPSPSPSLEDQDEDAMDCEASEGARSP  
CQHKAPSTVSSVAPEQSSPPEPKRVPTEGDPDWHPEMAPSCKDVVVDVTTNLVTVTIKEFPSPASGPASPSASIE  
ASTPPPAASEDSSVPKP

>Pfo\_LOC103143382

MELSAIGEQVFAVESILKKRLRKGNEVYLLKWKGWPPKYSTWEPEEHILDRRLVQAFEDKEERDRVIGHRRKGSKSKR  
LLLQNTVYTMDLRSAHKIPAKPPRLRLSLTRSLVPDDEDEDEDEDEDEACVPSRRQATHRKSQSRRLSNLQRP  
QEAWEDEDEDEDEDEDEDEDEDEDEDEDEDEDEDEDEDEDEDEDEDEDEDEDEDEDEDEDEDEDEDEDEDEDE  
SDKLWRPLVCPGEVTVTDVTLNALTVTVFRESRAARGFFQDWGLEVWEQVGDGAPRSCWRH

>Pfo\_LOC103153429

MELSSIGEQVFAVESITKKRIRKGNVEYLLKWKQGWPEYSTWEPEDNILDPLLVLAYEENQEKLRSLSRFRKGLRPRK  
LVLRNIFGMDLRSAHKDDEKPPRLRLSLTRSMSTVEQACRRRRARRNRQVTKAFPKHSSNKPIHEQKMKIEPVEK  
DWGGTSEEDKPGCESTTEERCEDSLYGQSECSSPAFLEEQDMDMEVEEKAASPDMMWTDEADGGIFETSQGDTSN  
EDNTLVSEAKPEVMVSPSGKSDWVEEGVEAFSESPTMEKKNATSVIVRVQCGKTMGDVAVSCSDSEPKKDEVRTDN  
QSVIVTAPDRPKVPYEAPRPGRVIVTNVTNCLTVTFKEASCSEGGFNCG

>Pfo\_LOC103133078

MELSAVGERVFAAESIIKRRIRKGRIEYLVKWKGWSPKYSTWEPEENILDARLFAAFEQRERERELYGPKKRGPCKPKT  
FLLKAQAKGKTKSYFRSEALRGMHVITYPTPEPVTPRAREGLRAVVPTIFPPSAVNRGESMRVRPSELSLHEQRSS  
LQQTDSGDHVTTPKKRGPCKPKPRFVDNFSPPVSEPRKRGTEEQEEEEEEEEEEEEEEEEETRGPHKLSKFQGD  
RLQKLAHRHSENHKKHHHHHHYHHHHHHTQKVSRSSSHQQLHSHRSMEPHRTKDGSGYLVAHFKQPHKASRGRPT  
PMEKPYFLDRRSPTRLDDSDQQTAWRPLCLSNVEKVLVDVTANFLTVTIKESSTSKGFFKDKR

>Pfo\_LOC103141633

MELSAVGESVFAAESIIKRRIRGRWEYLVKWKGWSQKYSTWEPEENILDERLFAAFEERERERELFGPKKRGPCKPET  
FLLKAKAKAKEKTYEFREAPRGIQVSYPIPEPVTPRAREGLRAVVPTIFPPSAVNRGESVPIRPEPERPRPAPL  
EALLDQESTRSPKKRGRKPKLPHYPHDASGSSEPAKRSRSLQSVMSRRLHHHGETSDHGLLQLTKRFQEETTI  
TPKSSGEQKHAGLSYACAFSPGVRKRDPEGHRTYSLRHLFPQHGLQRNAEERRHQAAVLSSQADPTAPSAPTWTPC  
FTNWDVTVTVDVTMNLTVTIRESSTAKGFFRDKR

>Gaf\_Cbx2 (ENSGAFG0000004995)

MEELSAVGEQVFDAECILNKLRLKGLFLVLKWRGWSSSKHNSWEPQENILDPRLLAAFNKKEQEKELMLKRRKRPRG  
RPRKIENIPEPQKSSSTSSASSSSSSDSSSSSSSSSSSEDEDEGDSQAKQVSPTIRPRELHPVPQKKAQIVMAQ  
EPPRKRNRKPLSPEAKEFQONKGPVKLTAKETDLPGAIAKPVHPASFTFMGFHRSSAKDAAPGPYRSLTQGGAVK  
PATSSPGSGRSSVQTASLALNKSQSRNATEGKLSISGGNSGSLDLKTAACKSKGVAALNVNTTKHPVQGTQHTLS  
PPSGPKKPHSTGSAMQRVAGTKAGASQSKNASSQGHQPLNLQNKQSQSGDAPGSGTTAALGLRSPVIPARKPTVGON  
LEANANKSSVSSGRPPARKPQAGGDKLREMEFQKVQGRLDKSCSEIQNPPPARTATKGSKKAKMTDMSTGEESSSDS  
DHDSSYAGQSHPVAGQNDWKPTRSLIEHVFTVDVTANLTVTVKESPTS VGFFSIRNY

>Gaf\_ENSGAFG0000015448

MEGVTVGQVFDAECILSKRQRKGKFEYLVKWRGWSSSKHNSWEPEENILDPRLLAAFHKREQERELLFQKGRKRPRGR  
RKILPEPTDTKDSHSSSSSFGLSSEPPSSSEEDDDHVKKAKQSPRIHPVPQKRPIILLAKADPPKKRGRKPLHPDL  
KALRQGKSLSPPRHHQPIRSPRDEPRPGVKPLQPASFTYPLGRSSREEGPSSFSQSSTSKPGSLNVCWWSGRSLSA  
SSSHNKGPSQKPSLRRRAVSETGSVRADAFKGSQKPTPLGLHSSFGGHPIVAQRPPPLTHRRHDSVGGHAGLVQHKQ  
QNSSFSKQSPSPTPRERSSQALNLRALNLQSVGKLPKSGSLQGGSRSTGVSKGTTAGGQRSGPGAAEGRSRTQPAGE  
SRQEEHKGSSSQNRNLNELSTGSDDTSSSESEHDPPSSFPDGRSPSVSGNTAESDFTDWRPARSLMEHVFTVDVTA  
NFITVTVKESPTS VGFFNSRNH

>Gaf\_Cbx4 (ENSGAFG00000020219)  
MELPTAGEHVFAVEGIEKKRIRKKGIEYLVKWRGWSPKYNTWEPEENILDPRLLVAFQHRERQEQQMMGYRKRGPCKPKH  
LLLQVPSFARRSNIPAGFEETLQDAEGTFKLDVPVQHPQPHYQLNSKKHHQYQPNSEQEIPADALNNSKKKFIYQLNSK  
KHHHYEPDPHMYDAQVSRLEKVVQVEPASKLANPGWNLPALQKQWIRNKDTGCLSKVKELAVEVRKPVKDAQSENA  
LKNPKDATLPSAMSSKMKI IKNNKNGRIVIVMSKYMDGNKVHGAKDKHRESSREEKTQSSKTQEDNPLPGAKMTEH  
PENGIPKEICKGSSVSVAEHPLKCSPKDRHFSKPSPTAAEYNTAVARGQADLPDDLPLQLTASSPPTSWTADTAIPT  
PTAVDQIRIPSPFDRKRKLSDPVEDRNVGKILLASRSLSVPTAAVTPQDKPMDLHCSVARHSSMCTTYDANGSQEEP  
MDLSCPKNRRRVEAEVQPPVEAEPAVEDTSPAKKNTQKSCEKSPEEPAKKISPFMGNIITDITTNLSLTVTFKEYVSE

>Gaf\_ENSGAFG00000007827  
MELPAAGEHVFAVESIEKKRSRKGRVEYLVKWRGWSPRYNTWEPEENILDPRLLDADFQDRERQEQLMGYRKRGPCKPKH  
LLVQVPSFARRSNILANLQEALEGNSCQKSSSIQMICPQAQQFQLNSKKLHQYQPLIRECDAEQQSNGKKFFYELNS  
KKHHHYQPDLDKQHEPVFAKPRDVKAPELSNKGYNLPAVLQOKWVRDKDSGCLTKVKDITMELKKIPADLKGQKEPERV  
KPKEDASTHNGVSSSKLKIVKNKNGRIVIVMSKYMENGMQTAKIKSSDSEGETERPLQGAESSVERHLAKMKLVKK  
LGLINGFSKQPKDNPVTPSSGIKADCKEKELESPQTERTVMEQDKGTGEGQLPQDKPLQLTNKPDELPLPSEREVTDKR  
EIQNSHHGLKRHLSDTDAEEQGLGKRFLSCRSISAPITDSSPSQSLVDRNEQQSPALLPDNGYADQEEPMDLSIVKS  
RPTSSVCVETEPGTRAEEPAHPPDDSRQTQDTQIESQTETHNPSEESTDIVSDSNHQARKDETFPSFQPCLGNIIVIT  
DITANCLTVTFKEYITA

>Gaf\_ENSGAFG00000007822  
MELSAVGERVFAAESI IKRRIRKGRIEYLVKWKGWSPKYSTWEPEENILDSRLFAAFEQRERERELYGPKKRGPCKPKT  
FLLKAQAKGKTKSYEFSEAVRGMHITYTPEPVFTPRAREGLRAVVPTIFPPSAVNREGESMRVRPSELSLHGYQRSS  
LQLTDSGTQVAPKKRGPKPKPRFVDDDFSPVSEPHKRRADEEEEEEEEEEEEEEEEEEEEEDEEERHGHKLSKFQGD  
QERRLQKLVRHSESHKHYQHSHHYHHPHHHHTQKVSRRSSHEQLHSHRSMEPHRTTDGSSYLVAHLRHHHKVSRG  
QPTTEFPMEKPYFLDKQSPTRFDDSDQQTAWRPRLSNVEKVLVTDVTANFLTVTIKESSTS KGGFFKDKR

>Gaf\_Cbx7a (ENSGAFG00000010693)  
MELLSIGEQVFAVESITKKRIRKGTVEYLLKWKQGWPPPEYSTWEPEDNILDPLLVLAYEENQEKLRSLSFRRKGLRPRK  
LVLRNIFGMDLRS AHKDEKPPRLRLSLTRSMSTDVEQACRRQARRRKRQRVTKAFPKRSSNKPIHEQKMKVEPVEK  
VWGGTSEEDKAGCESTTEERCEDSLYGQSECSSPPFLEEQDMDMEVEEKAASPDMTDEVDGGIFETSORHTNSHDKL  
EDNTLVSEAKPEVVFPSSRDWVEEEAFSESPTMEKKNATSVIVRVQCGKTTGDAVSVCSDSEPKKDEARSDNQSV  
IVTASDRPKAPYEAPRPGKVIIVTNVTNCLTVTFTEASCS EGFFNNG

>Gaf\_Cbx7b (ENSGAFG00000008146)  
MELSAIGEQVFAVESILKKRLRKGNVEYLLKWKGWPPKYSTWEPEEHILDRRLVQAFEDKEEKERVIGHRRKGSKSKR  
LLLQDTVYTMDLRS AHKIPAKPPRLRLSLTRSLVPDDEDEDEDEDDAWVPSRTHRKSQQRRLSLNVQSPSQDAWE  
EEEEEEEEEEENSAEDSEHREEEAEMGEGVFNGHRGPDNWSTAVGSGGAAASDKLWRPMVAPGEVTVTDVTNLALTVT  
FRESRAARGFFRDWGLEVWEQTETVALETAWLDRLL

>Gaf\_Cbx8a (ENSGAFG00000020216)  
MELSAVGESVFAAESI IKRRIRGRWEYLVKWKGWSSQKYSTWEPEENILDERLFAAFEERERERELFGPKKRGPCKPET  
FLLKARAKAKEKTYEVREAPRGIQVSYPIPEPIVTPRAREGLRAVVPTIFPPSAVNREGESVPIRPPEPERRPRPVPL  
EALLDQESRRSPKKRGRKPKLHPHYDQHDASGSSEPAPKRSRSLQESIMSRLHHHGETSDHSLQLTKRFQEETI  
TPKNSSEQKHAGLSYACAFSPGVHKRDP EGHRTYSLRSLHFPQHGLKRSAAEQRHQA AVLSSQADPTAPAAPTWTPTC  
YTWNWDTVTVTDVTMNLTVTIRESSATKGGFFRDKR

>Pre\_Cbx2 (Gene ID: 103469046)  
MEELSAVGEQVFDAECILNKRLRKGLFLVKWRGWSKSHNSWEPEENILDPRLLAAFNKKEQEKELLMLKRRKRPRG  
RPRKIENIPEPQKSSSTSSASSSSSSSSSSSSSSSEDEDEGDDSRKQASPTVRPRELHPVPQKKAQIVMAKQ  
EPPRRKNRKALPPEAKEFQONKGRPKVLKTAKETDLPGA IKKPVHPASFTFMGFHRSSAKDAAAGPYRSLTHGGAVK  
PAISSPGSGRSPVQTATLALSKSNQSRNATEGKLSIGNSGSLDLKTAACKSKGVAALNVNTTKHPVQGTTOHTLSP  
SGPKPKPQSTGSAMQVRVAGTKAGASQSSKNTSSSQGHQPLNLQNKQSQSGDAPGSGTTAASGLRSPVIPARKPTVAQNL  
EANSNKSPVSSGRPPARKPQAGGDKLREMKEFQKVQGRLDKSCSEIQNPARTATKGSKKAKMTDMSTGEESSSDSD  
HDSSYAGQGHPVAGQNQDWKPTRS LIEHVFTVDVTANLVTVTVKESPTSVGFFSIRNY

>Pre\_LOC103481889  
MEGVTVGQVFDAECILSKRQRKKGFEYLVKWRGWSKSHNSWEPEENILDPRLLAAFHKREQERELLFQKKGKRPRGR  
RKILPEPTDTKDSHSSSSSFGLSSEPSSSSEEDDDHVKKAKQSPRIHPVPQKRPQILLAKDPDPHKKKRGKPLHP  
DKALRQGKSLSPPRHHQPIRSPRDEPRGVKKPLQPASFTYPGLSRSSREEGASSFSQSSTSKPGSLNCVWAGRSL  
SASSSHNKGSPSQKPSSELRAVSETGSVRADAFKGSQAQKAPLGLHSSFGGHPIATQRPPLTHRRQDSVGGQSGLVQH  
KQQNSSFSKQLPSPTPRERTS QALNLRALNLQSVGKLPGSSGLQGGRSTGVGKGTAGGQSRSGPGAAEAGRSRTQPA  
GGRQEEHKGPNQNRNLNELSTGSDSTSSSESEHDPSSFDDTRPSVSSNAAESDTE TDWRPARSLMEHVFTVDV  
TANFITVTVKESPTSVGFFNSRNH

>Pre\_Cbx4 (Gene ID: 103463659)  
MELPAAGEHVFAVESIEKKRSRKGRVEYLVKWRGWSPRYNTWEPEENILDPRLLDADFQDRERQEQLMGYRKRGPCKPKH  
LLVQVPSFARRSNILADLQEALEGNSCQKSSSIQMICPQAQQFQLNSKKLHQYQPLIRECDAEQQSNGKKFFYELNS  
KKHHHYQPDLDKQHEAVFAKPRDVKAPELSNKGYNLPAVLQOKWVRDKDSGCLTKVKDITMELKKIPADLKEQKEPERV

KPKEDASTHNGVSSSKLKIVKNKNKNGRIVIVMSKYMENGMQTAKIKSSDSEGAERPLQGAESSVERHLAKMKLVKK  
LGLINGFSKQPKDNPTVPGSGIKADCCKEKELSPQTERTAMERDKGAEGQLPQDKPLQLTNKPDELPLPSEREVDPKT  
GIQNGHHGLKRHLSDTAAEQGLGKRFLSCRSISAPNTDSSPSQSLAVDRNEQQSPALLHDYGYADQEEPMDLSIVKS  
RSTSSVCVETEPETRAEEPAPHPDDSRTEQTESQTETHDPSEESADIVPDSNHQARKDEAFPSFQACLGNIUIT  
DITANCLTVTFKEYVTA

>Pre\_LOC103469229

MELPAAGEHVFAVEGIEKKRIRKGI EYLVKWRGWSPKYNTWEPEENILDPRLLVAFQHRERQEQMMGYRKRGP KPH  
LLLQVPSFARRSNIPAGLEEPVQDAEGTFKSDPVQRPQPQHYQLNSKKHHQYQPNSEQETPADALNNSKKKFIYQLNSK  
KHHHYEPDPHMYDAQVSRLEKVVVQETASKLANPXWNLPLALQQKWIRNKDTGCLSKVKELAVEVRKPVKDAQSENA  
LKPNPKEATLPSAVSSKMKIIKNKNKNGRIVIVMSKYMDGNKVHGVKDKHRETSRDEKTEXSKTQENNPXGAKMTKH  
PENGIPKEICKGSSVSVAEHLKCSPKDRHFSKPSPTAAEYNTAVARGQADLPDDLPLQLTASSPPTSWTADTAIPT  
PTAVDQIRIPSPFCDRKRKLSDPVEDRNVGKILLASRSLSVPTAAVTPPQDKPMDLHCSVARHNSTSATYBANGSQEE  
PMDLSCPKNRRRVEAEVQPPVXAEVQPPVEAEPVENTPPAKENEQKSCEKSPEEPAKNISPFMGNIITDITTNSLT  
VTFKEYVSF

>Pre\_Cbx6 (Gene ID: 108166384)

MELSATGDRIFAAEAIIKRRVRKGRLEYLVKWKGWAMKHSTWEPEENILDDRLLILGFEQKEREREIHGPKKRGP KPH  
FAAKGRGQKAEPSTRASSSRQSMPRSSSTTSSRASSSSSSSSSSAAPNALPFSSSSSAPAPSPKLNLSLAATHKLKDDI  
HRCHRMSSRRPLRPTDPRGPAFSSSSGFQSRMHVSPFSETVRILNRRVKPREVKRGRIILNLKVIDKPRGGGTAGSRN  
VQTGRQNI PSNRRIIGRKGEAPYRPFQPLKMLGFPMYKGFGLQCGGPM SFHSQTGSSSTTGPRDINSSSSQ RQARP  
PSSSSSTSSKVTAKRPQPAEASKESKSSKSPETQNASCSEAKTVPVPPSPSPSLEDQDEDAXDCXAASEGARXPC  
QHKGPSTVSSVAPEQSSSPLEPKRVPAGEPDWHPPEMAPSCKDVVVTDVTTNLVTVTIKEFPSPASGPASPSASIENA  
STPPPAASEDSSVLKP

>Pre\_LOC103482006

MELSAIGEQVFAVESILKRLRKG NVEYLLKWKGWPPKYSTWEPEEHILDRRLVQAFEDKEERDRVIGHRRKGAKSKR  
LLLQNTVYTMDLRSAHKIPAKPPRLRLSLTRSLVPDDEDEDEDEDACVPSRTQAAHRKSKQSRRLSLQRPSQEAWE  
EDEEEEEEEDEKEEEEEKNSAEDSEHREEEEAEMEGVFIGHRGPDWTSTAVGSCGAAASDKLWQPMVCPGEVTVT  
DVTNLALT VTFRESRAARGFFRDWGLEVWEQVEKVRHGGFLYLWLWLG

>Pre\_LOC103468464

MELSSIGEQVFAVESITKKRIRKGNVEYLLKWKQGWPEYSTWEPEDNILDPLLVLAYEENQEKLRSLSRFRKKGLRPRK  
LVLRNIFGMDLRSAHKDDEKPPRLRLSLTRSMSTDVEQACRRRARRRNRQRVTAKAFQKHSSNKPIHEQKMNVEPVEK  
DWGGTSEEDKPGCESTTEERCEDSLYGQSECSSPPFLEEQDMDEVEEKVASPDMWTDEADGGIFETSQRHTNSHDES  
XDNLVSEAKPEVVVSPSGRSDWVEEGVEAFSESPTTEKNATSVIVRVQCGKXTGDAVSVCS DSEP KKD EARS DN  
QSVIVTASDRPKVPYEAPRPGRVIVTNVTVNCLTVTFKEASCSEGGFFNGC

>Pre\_Cbx8 (Gene ID: 103463651)

MELSAVGERVFAAAESI KRRIRKGRIEYLVKWKGWSPKYSTWEPEENILDSRLFAAFEQERERELYGPKKRGP KPH  
FLLKAQAKGKNNSYEFRSEAVRGMHVTYPTPEPVTPRAREGLRAVVPTIFPPSAVNRGESMRVRPSEL SLHDHQRSS  
LQQTDS DGHVQTPKKRGPKPKPRFVDDDFSPVISEPRKRGTEEEEEEEEEEEEEEEEEEEEEERRGPHKLSKFQ  
GDEETRLQKLDHRHS ENHKKHHHHHHYHHHHHTQKVS RGS SHKQLHSHRSM EPHRTKDGSGYLVAATHFKQQHKASRG  
RPAGLPPEMKPYFLDRRSPTRFDDSDQQTAWRPSLSNVEKVLVTDVTANFLT VTIKESSTS EGGFFKDKR

>Pre\_LOC103469230

MELSAVGESVFAAAESI KRRIRGRWEYLVKWKGWSQKYSTWEPEENILDERLFAAFEERERELFGPKKRGP KPH  
FLLKAKAKAKEKTYEFRREAPRGIQVSYPIPEPVTPRAREGLRAVVPTIFPPSAVNRGESVQIRPPEPERRRPRAPL  
EALLDQESTRSPKKRGRKPKLHPHYDPHDASGSSEPAKRSRSL EEQSVMSRRLHHHGETSDHSLQLTRRFQ EETTI  
TPKSSSEQKHAGLSYACAFSPGVRKRDP EGHRTYLSRLHFP RHGKLRSAEERRHQASQADQTAPSAPTWTPSF TNW  
DVTVTVDVTMNLTVTITRESSTAKGFFTDKR

>Xco\_LOC114160441

MEELSAVGEQVFDAECILNKRLRKGL EFLVWKRGWS SKHNSWEPQENILDPRLLA AFNKKEQEKELMLKRRKRPRG  
RPRKIENIPEPQKSSTSSASSSSSSDSSSSSSSSSEDEDEGDDGHAKQASPTVRPRELHPVPQKKAQIVMAKQ  
EPLRKRNRKPLPPEAKEFQONKGPRKVLKTARETDLPGAIKKPVHPASFTFMGFHRSSAKDAAPGYPYRSLTQGGAVK  
PATSSPGSGRSSVQTASLALNKSNIQRNATEGKLSISGGNSGGSLDLKTAACKSKGVAALNVNTTKHPVQGTQTHTLS  
SPSGPKKPHSTGSAMQRVAGTKAGASPSKSSSNQGHQPLNLQNKQSQSGDAPGTTAASGLRNPVIPARKPTVAQNLE  
TNANKSPVSSGRPPARKPOAGGDKLREMKEFQKVQGRLDKSCSEIQNP PARTATKGSKKAKMTDMSTGEESSSDSDH  
DSSYAGQGHPVAGQNQDWKPTRSLIEHV FVTDVTANLVTVTVKESPTS VGGFFSIRNY

>Xco\_LOC114152221

MEGVTVGQVFDAECILSKRQRKGKFEYLVKWRGWS SKHNSWEPEENILDPRLLA AFHKREQERELLFQKKGKRPRGR  
RKILPEPADTKDSHSSSSSFGLSSEPSSSSSEEDDDHVKKAKQSPRIHPVPQKRPQILLAKPDPPHKKRGRKPLHPD  
LKALRQGKSLPSPRRHQPIRSRDEPRPGVKKPLQPASFTYPGLSRSSREEGASSFSQSSTSKPGSLNCVWAGRSLS  
ASSSHNKGSPSQKPSSELRRRAVSETGSRADAFKGS AQKPAPLGLHSSFGGHPIAAQRPLPLTHRRHDNVGGQSGLVQHK  
QQNSSFSKQSPSPTPRERTSQALNLRALNLQSVGKLP GSGGLQGGSRTGVSKGTTAGGQ RSGPGAAEPGRSRTQ PAG

GSRQEEHKHGSSSQNRNLNELSTGSDDTSSSESEHDPSSFPGDTRPSVSSNTAESDTE **TDWRPARSLMEHVFTDVT**  
**ANFITVTVKESPTS**VGFFNSRNH

>Xco\_Cbx4 (Gene ID: 114145263)

MELPAAGEH **VFAVESIEKKRSRKGVEYLVKWRGWS**PRYNTWEPEENILDPRLLD**AFQDRER**QEQLMGYRKRGPCKPKH  
LLVQVPSFARRSNILANLQEASLEGNSCQKSSSIQMICPQAPQFQLNSKKLHHYQPLIRECDPEQQSNGKFFFYELNS  
KKHHHYQPDLDKQHEPFAKPRDVKAPELSNKGYNLPAVLQQKWVRDKDSGCLTKVKDITMELKKIPADLKGQKEPERV  
KPKEDASTHSNGVCSKLLKIVKNKNNGRIVIVMSKYMENGMTAKIKSSDSEGAERPLQGAESSMEGRLAEMELVKK  
LSLINGFSKQPKDNPTVPTSGIKADCCKEKELSPQTERTVMEQDKGAEGQLPQDKPLQLTNKPDELPLPSEREVPDKK  
GIQNGHHGLKRHLSDTDAEEQGLGRFLSYRSISAPNTDSSPSQSLIVDRNEQQSPALLHDYGYADQEEFMDLSIVKS  
RPTSLVCVGTEPETRAEEPAPHPLDDSRQTQADTQTESQTETHNLSEESADIVSDSNHQARKNEAF **PSFQPCIGNIVIT**  
**DITANCLTVTFKEYVTA**

>Xco\_LOC114160311

MELPAAGEH **VFAVEGIEKKRIRKGI EYLVKWRGWS**PKYNTWEPEENILDPRLLV**AFQHRER**QEQQMGYRKRGPCKPKH  
LLLQVPSFARRSNIPAGFEETVQDTEGTFKLDPVQRPQLQHYQLNSKKHHYQYQNSQEI PADSLNNSKKKFIYQLNSK  
KHHHYEPDPHMYDAQVSRLEKVVVQEPASKLANPGWNLPALQQKWIRNKDTGCLSKVKELAVEVRKPVKDAQSENA  
LKPNPKEATLPSAVSSKMKI IKNNNNGRIVIVMSKYMDGNKVHGAKDKHRESSRDEKTQSSKTQENNPFGAKMTEH  
PENGIPKEICKGSSSVSAEHPLKCSPKDRHFSKPSPTAAEYNTAVARGQADLPDDLPLQLTASSPPTSWTADTAIPT  
PTAVDQIRIPSFCDKRKRLSDPVEDRNLGKILLASRSLSVPTAAVTPQDKPMDLHCSVARRSSMCTMYDANGSQEE  
PMDLSCPKNRRQVEAEVQPPVEAEFVVEDTPPPKENKQESCEKSPEE **PANKISPFMGNIITDITTNRLTVTFKEYVS**  
**F**

>Xco\_Cbx6 (Gene ID: 114145658)

MELSAAGDR **IFAAEAILKRRVRKGRLE YLVKWKGW**AMKHSTWEPEENILDDRLL**LGFEQKER**EREMHGPKKRGPCKPKH  
VVAKGRGQKAEPSTRTSSSRQNTPRSSSTASSRASSSSSAVPNALPFSSSSAPAPSPKLNLAATHKLKDDIHRCHR  
MSRRPLPRTDPTRSAFSSSSGFQSRMHVSPFSETVRI LNRRVKPREVKRGRIILNLKVIDKPGRGGGAAGSRNVQTG  
RQNI PSRNRIIGRKGAEAPYRPFQPLKMLGFPMYGKPFGLQCGGPMFSHQTGSSSTTGARHSNSSSQRRALPPSSS  
SSSTSTNVTAHPQPATEASKESKSSKSPETQNASCSEANKILVPPSPSPSLEDQDEDAMDCSEASEEARSPCQHKAP  
FTVSSVAPEQSSPHPESKRVPAGEP **PDWHPEMAPSCKDVVVTDTVTTNLVTVTIKEFPSE**ASGPASPSASVENGSTPPP  
AATSEDSSAPKP

>Xco\_LOC114160060

MELSSIGEQ **VFAVESITKKRIRKGTVEYLLKWKQGW**PTEYSTWEPEDNILDPLLVLAYEEN**QE**KLRSLSRFRKKGLRPRK  
LVLRNIFGMDLRSAHKDDKPPRLRLSLTRSMSTVEQACRRRRRARRRNRQRVTKAFPKHSSNKPIHEQKMKVAPV  
EKDWGGTSEEDKPGCESTTEERREDSLYGQSECSSPFFLEEQDMDTEVEEKAASPDMTDEADGRIFETSQRDTNSQN  
ESENTLVSEAKPEEVAEMGVFNGHRGPDNWSTAVSGSGSD **KLWRPMPVAPGEVTVTDVTINALTVTFRESRAA**RGFF  
DNQSVIVTAS **DRPKVPYEAPRPGKVI VTNVTVNCLTVTFKEASCS**DGFFNGC

>Xco\_LOC114151814

MELSAIGEQ **VFAVESILKKRLRKGNVEYLLKWKGW**PPKYSTWEPEEHILDRRLVQAFED**KEE**KDRVIGHRRKGSKSKR  
LLLQNTVYTMDLRSAHKIPAKPPRLHLSLTRSLVPDDEEDGACVPSRTHRSKQSRRLSLNLQGPSQEAWEEEEEE  
EENSAEDSEHEEAEEMGEVFNHGRGPDNWSTAVSGSGSD **KLWRPMPVAPGEVTVTDVTINALTVTFRESRAA**RGFF  
RDWGLEVWEQVGDGAPQSCWRH

>Xco\_Cbx8 (Gene ID: 114145391)

MELSAVGER **VFAAE S I K R R I R K G R I E Y L V K W K G W**SPKYSTWEPEENILDSRLFAAFE**Q R R E R**EQELYGPKKRGPCKPKT  
FLLKAQAKGKTKSYEFSEAVRGMHITYPTPEPVFTPRAREGLRAVPTIFPPSAVNRGESMRVRPSELSLHGHQRSS  
LQHTDSQGTVPQAPKKRGPCKPRFVDGDFSPVSEPHKRRAE EEEEEEEEEERHGHKLSKFQGD EEMRLQKLAHRH  
SENHKKHHQH HHHYHHHHHTQKVSQ LHSRSL EPHRTTDGSSYLVA AHLKHHHKASRGPPTEFPPMEKPYFLDRQSPT  
RFDDSDQDQ **TAWRPCLSNVEKVLVTDVTANFLT VTIKESSTS**KGFFKDKR

>Xco\_LOC114160318

MELSAVGES **VFAAE S I K R R I R R G R W E Y L V K W K G W**SQKYSTWEPEENILDERLFAAFE**RER**ERELFGPKKRGPCKPET  
FLLKAKAKAKEKTYEFREAPRGIQVSYP IPEHVVTPRAREGLRAVPTIFPPSAVNRGESVP I R P P E P E R R P R P V L  
EALLDQESRGSPKKRGRKPKLHPHYDPHDASGSSEPAKRSRSL EEQSIMSRLHHHGETSDHSLQLTKRFQEETT I  
TPKSNSEQKHAGLSYTCAFSPGERKRDPEGHRTYLSRLDFPQHGLKRS AEERGHQA AVLSSQADPTAPSA **PTWT P C**  
**YTNWDTVTVTDVTMNL LTVTIRESSTA**KGFFRD

>Pla\_LOC106937812

MEGVTVGQ **VFDAECILSKRQRKGKFEYLVKWRGWS**SKONSWEPEENILDPRLLA**AFHKREQ**ERELLFQKKG **KRPRGRF**  
**RKILPE**PTDTKDSHSSSSSFGLSSEPPSSSEEDDDDHVKKAKQSPRIHPVPQKRPQILLAKPDPPR **KKKRGKPLHP**  
**DI**KALRQGSLSLPSPPRHQPIRSRDEPRPGVKKPLQPASFTYPGLSRSSREEGASSFSQGSTSKPGSLNCVWAGRSL  
SASSSHNKGSPSQKPSSELRTVSETGSVRADAFKGSQAQKAPAPLGLHSSFGGHP IAAQRPLTHRRQDSVGGQSGLVQH  
KQQNSSFSKQLPSPTPRERTSQALNLRALNLQSVGKLP GSGGLQGGSRSSTGVGKGTAGGQ RSGPGVTEAGRSRTQPA  
GGSQEEHKHGSSSQNRNLNELSTGSDDTSSSESEHDPSSFDDTRPSVSSNAAESDTE **TDWRPARSLMEHVFTDVT**  
**TANFITVTVKESPTS**VGFFNSRNH

>Pla\_LOC106943510

MEELSAVGEQVFDACILNKLRLKRGKLEFLVKWGRGWSSKHNSWEPQENILDPRLLAAFNKKEQEKELMLKRRKRPRG  
RPRKIENIPEPQKSTSSASSSSSSSSSSSSSEDEGDDSRKQASPTVRPRELHPVPQKKAQIVMAKQ  
EPQRRNRKPLPPEAKEFQQNKGPVKVLKTTKETDLPAGAIKKPVHPASFTFMGFHRSSAKDAAAGPYRSPLTQGGAVK  
PAISSPGSGRSSVQTASLALSNSQSRNATEGKLSIGNSGSLDLKTAACKSKGVAALNVNTTKHPVQGTTOHTLSPP  
SGPKKPQSTGSAMQVRVAGTKAGASQSSKNTSSSQGHQPLNLQSKQSQSGDAPGSGTTAASGLRSPVIPARKPTVAQNL  
EANANKSPVSSGRPPARKPQAGGDKLREMKEFQKVQGRLDKSCSEIQNPARTATKGSKKAKMTDMSTGEEESSSDSD  
HDSSYAGQGHPVAGQNQDWKPTRSLIEHVFTVDVTANLVTVTVKESPTS VGFFSIRNY

>Pla\_Cbx4 (Gene ID: 106958633)

MELPAAAGEHVFAVESIEKKRSRKGRVEYLVKWRGWSPRYNTWEPEENILDPRLLDADFQDRERQEQLMGYRKRGPKPKH  
LLVQVPSFARRSNILADLQEALEGNSCQKSSSIQMMCPQAQQFQLNSKKLHQYQPLIRECDAEQQSNGKKFFYELNS  
KKHHHYQPDLLQHEAVFAKPRDVKAPELSNKGYNLPAVLQQKWVRDKDSGCLTKVKDITMELKKIPPADLKGQKEPER  
VKPKEDASTHSNGVSSSKLKIVKNKNGRIVIVMSKYMENGMQTAKIKSSDSEGAERQGAENSVERHLAKMKLVKKL  
GLINGFSKQPKDNPTVPSSGIKADCCREKELSPQTERTAMERNKGAEGQLPQDKPLQLTNKPDELPLPSEREVPDKTG  
IQNGHHGLKRLHSDTAAEQGLGKRFLSCRSISAPNTDSSPSQSLTVDRNEQQSPALLHDYGYADQEEFMDLSIVKSR  
PTSSVCVETEPETRAEEPAHPPDDSRQTQDTQTESQTETHNPSEEEESADIVPDSNHQARKDEAFPSFQACLGNIIVIT  
DITANCLTVTTFKEYVTA

>Pla\_LOC106957183

MELPAAAGEHVFAVEGIEKKRIRKKGIEYLVKWRGWSPKYNTWEPEENILDPRLLVAFQHRERQEQMMGYRKRGPKPKH  
LLLQVPSFARRSNIPAGLEETVQDAEGTFKLDVPQRQPQHYQLNSKKHHQYQPNQEI PADALNNSKKKFIYQLNSK  
KHHHYEPDPYMDAQVSRLEKVVVQETANKLANPGWNLPLALQQKWIRNKDTGCLSKVKELAVEVRKPVKDAQRENA  
LKPNPKEATLPSSVSSKMKIKNKNKNGRIVIVMSKYMDGNKVHGAKDKHRESSREEKTQSSKTQENNNPPGAKMTEH  
PENGIPKEICKGSSVSVAEHPLKCSPKDRHFSKPSPTAAEYNTAVARGQADLPDDLPLQLTASSPPTSWTADTAIPT  
PTAVNQIRIPSFCDRKRKLSDPVEDRNVGKILLASRSLSVPTAAVTPPQDKPMDLHCSVARHSSTCATYDANGSQEE  
PMDLSCPKNRRRVEAEVQPPVEAEPAVEDTPPVKDNTQKSCEKSPEEPAKKISPFMGNIITDITTNLSLVTTFKEYVS  
F

>Pla\_Cbx6 (Gene ID: 106936647)

MELSAAGDRIFAAEAILKRRVRKGRLEYLKWKWGWAMKHSTWEPEENILDDRILILGFEQKEREREMHGPKKRGPKPKN  
FVAKGRGQKAEPSTRASSSRQSTARSSSTSSRASSSSSSSSSSSSAAPNALPFSSSSSSSVFAPSPKLNLSLAATHKLK  
DIHRCHRMSSRRPLPTDPTPAFSSSSSGFQSRMHVSPFSETVRI LNRRVKPREVKRGRIILNLKVIDKPRGGGAAGS  
RNVQTGRQNI PSNRRIIGRKGEAPYRPFQPPKMLGFPYMGKPFGLQCGGPMFSFHSQMGSSTTGPRDSNSSSSQQA  
PPSSSSSSSTSSNVTAKRPQSAEASKESKSSKSPETQNASCSEANKTPVPPSPSPSLEDQDEADAMCSEASEGARSP  
CQHKAPSTVSSVAPEQSSPPLEPKRVPTEGDPDWHPEMAPSCKDVVVTVDVTNLVTVTIKEFPSPASGPASPSASIE  
ASTPPPAASEDSSVVKP

>Pla\_LOC106961268

MELSAIGEQVFAVESILKRLKRGKNGVEYLLKWKGWPPKYSTWEPEEHILDRRLVQAFEDKEERDRVIGHRRKGSKSKR  
LLLQNTVYTMDLRS AHKIPAKPPPRRLRLSLTRSLVPDDEDEDEDEDEDEACVPSRRQATHRKSQSRRLSLNLQRP  
QEAWEDEDEDEDEDEDEDEDEDEDEDEDEDEDEDEDEDEDEDEDEDEDEDEDEDEDEDEDEDEDEDEDEDEDEDE  
SDKLWRPLVCPGEVTVTDVTLNALTTFRESRAARGFFQDWGLEVWEQVGDGAPRSCWRH

>Pla\_LOC106961608

MELSSIGEQVFAVESITKKRIRKGNVEYLLKWKGWPPPEYSTWEPEDNILDPLLVLAYEENQEKLRSLSFRRKGLRPRK  
LVLRNIFGMDLRS AHKDDKPPRLRLSLTRSMSTVEQACRRRARRRRNRQVTKAFPKHSSNKPIHEQKMKIEPVEK  
DWGGTSEEDKPGCESTTEERCEDSLYGQSECSSPPFLEEQDMDTEVEEKAASPDMDTDEADGGIFETSQGHNTSHDES  
EDNTLVSEAKPEVMVSPSGKSDWVEEGVEAFSESPTMEKNATSIVIRVQCGKTMGDAVSVCSDSEPKKDEVRTDN  
QSVIVTASDRPKVPYEAPRGRVIVTNVTNCLTVTTFKEASCSEGGFFNGC

>Pla\_LOC106957191

MELSAVGESVFAAESIIKRRIRRGWEYLVKWKGWSSQKYSTWEPEENILDERLFAAFEERERERELFGPKKRGPKPET  
FLLKAKAKAKEKTYEFREAPRGIQVSYPPEPVVTPRAREGLRAVVPTIFPPSAVNREGESVPIRPPPEERRPRPAPL  
KALLDQESTRSPKRGKPKLHPHYDPHDASGSSEPAPKRSRSLQSVMSRRLHHHGETSDHGLLQLTKRFQEETI  
TPKSSGEQKHAGLSYACAFSPGVRKRDPEGHRTYLSRLHFPQHGKLQRNAEERRHQAAVLSSSEADPTAPSAFTWTPC  
FTNWDVTVTVDVTMNLVTIRESSTAKGFFRDKR

>Pla\_LOC106958634

MELSAVGERVFAAESIIKRRIRKGRIEYLVKWKGWSPKYSTWEPEENILDARLFAAFEQREERELYGPKKRGPKPKT  
FLLKAQAKGKTKSYEFSEALRGMHVTYTPEPVFTPRAREGLRAVVPTIFPPSAVNREGESMRVRPSELSLHEHQRSS  
LQQTDSGDHVTTPKKRGPKPKPRFVDDNFSVASKARKRGTEEEEEEEEEEEEEEEEEEEEEETRGPHKLSKFQGDDE  
MRLQKLAHRHSENKHHHHHHHHHHHHHTQKVSRSSSHQQLHSHRSMEPHRTKDGSGYLVAHFKQPHKASRGRPTL  
PPMEKPYFLDRSPTRLDDSDQQTAWRPCLSNVEKVLVTDVTANFLVTIYESSTSKGFFKDKR

>Pme\_LOC106924748

MEGVTVGQVFDAECILSKRQRKGKFEYLVKWRGWSSKHNSWEPEENILDPRLLAAFHKREQERELLFQKKGKRPRGRF  
RKILPPTDTKDSHSSSSSFGLSSEPSSSSSEEDDDDHVKAKQSPRIHPVPQKRPQILLAKPDPKRKKRGRKPLHP  
DLKALRQGKSLPSPRRHHQPIRSPRDEPRPGVKPLQFASFTYPLGRSSSREEGASSFSQGSTSKPGSLNCVWAGRSL  
SASSSHNKGSPSQKPSSELRRVSETGSRADAFKGSQKPAPLGLHSSFGGHPIAAQRPPLTHRRQDSVGGQSTGLVQ  
HKQQNSSFSKQLPSPTPRERTSQALNLRALNLQSVGKLPGSGGLQGGSRSSTGVGKGTAGGQRSQPGATEAGRSRTQP  
AGGSRQEEHKHGPSSQNRNLNELSTGDSDDTSSSESEHDPSSFDDTRPSVSSNAAESDTETDWRPARSLMEHVFTD  
VTANFITVTVKESPTSVGFFNSRNH

>Pme\_LOC106914323

MEELSAVGEQVFDAECILNKRRLKKGLEFLVKWRGWSSKHNSWEPEENILDPRLLAAFNKKEQEKELMLKRRKRPRG  
RPRKIENIPEPQKSTSSASSSSSSSSSSSSSEDEDEGDDSRKQASPTVRPRELHPVPQKKAQIVMAKQ  
EPPRKRNRKPLPPEAKEFQQNKGPVKVLKTAKETDLPGAIIKPVHPASFTFMGFHRSSAKDAAAGPYRSPLTQGGAVK  
PAISSPGSGRSSVQTASLALSNSQSRNATEGKLSIGNSGSLDLKTAACKSKGVAALNVNTTKHPVQGTQHTLSPP  
SGPKKPQSTGSAMQRVAGTKAGTSQSSKNTSSSQGHQPLNLQSKQSQSGDAPGSGTTAASGLRSPVIPARKPTVAQNL  
EANANKSPVSSGRPPARKPQAGGDKLREMKEFQKVQGRDLKSCSEIQNPARTATKGSKKAKMTDMSTGEESSSDSD  
HDSYAGQGHPVAGQNQDWKPTRSLIEHVFTDVTANLVTVTVKESPTSVGFFSIRNY

>Pme\_Cbx4 (Gene ID: 106928181)

MELPAAGEHVFAVESIEKKRSRKGVEYLVKWRGWSPRYNTWEPEENILDPRLLDADFQDRERQEQLMGYRKRGPKPKH  
LLVQVPSFARRSNILADLQEALEGNSCQKSSSIQMMCPQAQQFQLNSKKLHQYQPLIRECDAEQQSNGKKFFYELNS  
KHHHHYQPNLKQHEAVFAKPRDVKAPELSNKGYNLPAVLQQKWVRDKDSGCLTKVKDITMELKKIPPADLKGQKEPER  
VKPKEDASTHNGVSSSKLKIVKNKNGRIVIVMSKYMENGMQTAKIKSSDSEGAERQGAESSVERHLAKMKLVKKL  
GLINGFSKQPKDNPTVPSSGKADCKEKEKELSPQTERTAMERDKGTEGQLPQDKPLQITNKPDELPLPSEREVPDKTG  
IQNGHHGLKRLSDTDAAEQGLGKRFLSCRSISAPNTDSSPSQSLTVDRNEQQSPALLHDYGYADQEEPMDLSIVKSR  
PTSSVCVETEPETRAEEPAHPPDDSRQTQDTQTESQTETHNPSEEEESADIVPDSNHQGRKDEAFPSFQACLGNIUIT  
DITANCLTVTTFKEYVTA

>Pme\_LOC106904416

MELPAAGEHVFAVEGIEKKRIRKKGIEYLVKWRGWSPKYNTWEPEENILDPRLLVAFQHRERQEQMMGYRKRGPKPKH  
LLLQVPSFARRSNIPAGLEETVQDAEGTFKSDPVQRPQPHYQLNSKKHHQYQPNQEI PADALNNSKKKFIYQLNSK  
KHHHYEPDPHMYDAQVSRLEKVVKVQETANKLANPGWNLPLALQQKWIRNKDTGCLSKVKELAVEVRKPVKDAQRENA  
LKPNPKEATLPSAVSSKMKI IKNNKNGRIVIVMSKYMDGNKVHGAKDKHRESSREEKTQSSKTQENNLPPGAKMTEH  
PENGIPKEICKGSSVSVAEHPLKCSPKDRHFSKPSPTAAEYNTAVARGQADLPDDLPLQLTASSPPTSWTADTAIPT  
PTAVDQIRIPSPFCDRKRKLSDPVEDRNVGKILLASRSLSMPTAAVTPPQDKPMDLHCSVARHSSTCATYDANGSQEE  
PMDLSCPKNRRRVEAEVQPPVEAEPAVEDTPPVKDNTQTSCEKSPEEPAKKISPFMGNIITDITTNLSLTVTTFKEYVS  
E

>Pme\_Cbx6 (Gene ID: 106904597)

MELSAAGDRIFAFAEAILKRRVRKGRLEYLVKWKGWAMKHSTWEPEENILDDRILILGFEQKEREREMHGPKKRGPKPKH  
FVAKGRSQKAEPSTRASSRQSTPRSSSTTSSRASSSSSSSSSSAAPNALPFSSSSSSAPAPSPKLNLAATHKLKK  
DIHRCHRMSSRPLPRTDPTPAFSSSSGFGSRMHVSPFSETVRI LNRRVKPREVKRGI ILNLKVIDKPRGGGAAGS  
RNVQTGRQNI PSNRNRIIGRKGEAPYRPFQPPPLKMLGFPMYKGFGLQCGGPMFSHSTGSSSTTGPRDSNSSSSQQA  
PPFSSSSSTSSNVTAKRPQPAEASKESKSSKSPETQNASCSEANKTPVPPSPSPSLEDQDEADAMDCSEASEGARSP  
CQHKAPSTVSSVAPQSSPPEPKRVPTEGD PDWHPEMAPSCKDVVVTDVTTNLTVTITKEFPSPASGPASPSASIE  
ASTPPPAASEDSSVPKP

>Pme\_LOC106910083

MELSAIGEQVFAVESILKKRRLKGNVEYLLKWKGWPPKYSTWEPEEHILDRRLVQAFEDKEERDRVIGHRRKGAKTKR  
LLLQNTVYTMDLRSAHKIPAKPPRLRLSLTRSLVPDDEDEDEDEDEACVPSRTQAAHRKSKQSRRLSLNLQRPSEQ  
AWEEEEDEEEEEEEEEEEKNSEADSEHLSQPKTTNHSQKEKEEAKMGEGVFNGHRGLDNWSTAVSGGADTSDKL  
WRPLVCPGEVTVTDVTINALTVTTFRESRAARGFFQDWGLEVWEQVGDGAPRSCWRH

>Pme\_LOC106933457

MELSSIGEQVFAVESITKKRIRKGNVEYLLKWKGWPPPEYSTWEPEDNILDPLLVLAYEENQEKLRSLSFRKKGLRPRK  
LVLRNIFGMDLRSAHKDEKPPRLRLSLTRSMSTDVEQACRRRARRRNRQRVTKAFPKHSSNKPIHEQKMKIEPVEK  
DWGGTSEEDKPGCESTTEERCEDSLYGQSECSSPAFLEEQDMDMEMEKAASPDMTDEADGGIFETSQGDNTSHDES  
EDNTLVSEAKPEVMVSPSGKSDWVEEGVEAFSESPTMEKKNATSVIVRVQCGKTMGDAVSVCSDSEPKKDEARTDN  
QSVIVTAPDRPKVPYEAPRGRVIVTNVTNCLTVIFKEASCSGEGFNCG

>Pme\_LOC106904421

MELSAVGESVFAAEESTIKRIRRRGRWEYLVKWKGWSQKYSTWEPEENILDERLFAAFEERERERELFGPKKRGPKPET  
FLLKAKAKAKEKTYEFREAPRGIQVSYPIPEPVVTPRAREGLRAVVPTIFPPSAVNRGESVPIRPPPEPERRPRPAPL  
EALLDQESTRSPKKRGRKPKLHPHYDPHDASGSSEPAPKRSRSLQSVMSRRLHHHGETSDHGLLQLTKRFQEETTI  
TPKSSGEQKHAGLSYACAFSPGVRKRDPEGHRTYSRLHFPQHGKLRNAEEQRHQAAVLSSQADPTAPSAPTWTTPC  
FTNWDVTVTVDVTMNLTVTITRESSTAKGFFFRDKR

>Pme\_LOC106928182



MELSAVGERVFAAESIIKRRIRKGRIEYLVKWKWGWSPKYSTWEPEENILDSRLFAAFEQRERERELYGPKKRGPKPKT  
FLLKAQAKGKTKSYEFSEAVRGMHVITYPTPEPVFTPRAREGLRAVVPTIFPPSAVNRGESMRVRPSELSLHEHQRSS  
LQQTSDSGHVQTPKKRGPKPKPRFVDDNFSPVSEPRKRGTEEEEEEEEEEEEEEEEEETRGPHKLSKFQGDDEEM  
RLQKLAHRHSENHRHHHHYHHHHHTQKVSRSMEPHRTKDGSGYLVAFHKQPHKASGRPTLPP  
MEKPYFLDRRSPTRLDDSDQQTAWRPCLSNVEKVLVTDVTANFLTITIKESSTSKGFFKDKR

>Nfu\_Cbx2 (Gene ID: 107397219)

MEELSAVGEQVFDAECILNKRTRKGKLEFLVKWKGWSSKHNSWEPEENILDPRLLVAFNKKEQEKELLMLKRGKPRPG  
RPRKILENIPDPSSSSSSSSSSSSSDSSSSSSSSSSSSDDDDDDNDSHVKQSSPTVTRTRELHPVPQKKAQIVMKQD  
SSKKRSRKLSPPEVKEFQLNKSHPKVLKTIKDLPLGAIKKPVHPSSFTFMGFHRTLGAQYRSPLNQGAIAKTPMSS  
AGPGLRTGQTSSSLPLNKSQNRNVTGKLSVPSMNTGASLDLKTAAASKGVAAFNLNTSKHPIQGTPQHTLSPNGQ  
KKPQAPVSTMQRIPSSKAGASLPSKNNPSVQQPSPQPLNLQNKHSQVSDSPGNGSTPGSGVRNPPNPTRKSTVAQNQE  
ANLPKSPVTSGRPPVRKPOPGADRAREVNEIQTAQVQGRLDKSCTEIHNQQERATKGSKKAKMTEMSTGEESSSDS  
DPDSSYPGHCHSVSQNQDWKPTRSLIEHVFTVDVTANLVTVTVKESPTSVGFFSIRNY

>Nfu\_LOC107387235

MEGVTVGQVFDAECILSKRQRKGKFEYLVKWSGWSSKHNSWEPEENILDPRLLAFAFKREQERELLFQKKGKRPGRG  
RKIVPEPTSTKDSRSSSSSSGLSSSPSSSSSEEDDDDDDDHVKKVRPSSRLHPVPQKRPQILLAKDPFPYKKRGR  
KPLHPDIKALRQTKSPSLPPPLSPPPPRHHQPIRLPRDDPRLGVKKPLQPASFTYTGLSRSSRDEGSSTSQSSSSFS  
PSATSKPGSLNCVWINRSLSTSSHNVSLSHKSSSELRSISETGSSRSSSLKAGGAASPLGSSFGGPAALQHPQMGQR  
RQEGVGCHGGHVQHKQQNSSFTKPSSSSTSRERTNQALNLRALNLQSVKTSNSSLQGAASSRTSSIVGKGSAAQAQ  
RSSLTAGGAAETGRLGRQEERKHGLSSQNRLNELSTGSDSDTSSSESERDPSLFPDSRPSLGDNATESDTETDWRP  
ARSLLEHVFTVDVTANFIVTVVKESPTSVGFFTSRNY

>Nfu\_LOC107376532

MELPAAGEHVFAVEGIEKKRIRKKGKIEYLVKWRGWSPKYNTWEPEENILDPRLLVSFQHRERQEQLMGYRKRGPCKPH  
LLLQVPSFARRSSIPAGFEDTSQDIEATIKPDPIQVQRSQPQQYQLNSKKHHQYQPGNAEVPADQLANSKKKFIYQLN  
SKKHHHYEPDPHMYDTQASRLKEVVKVQEPASKPTNPWNLPALQQKWIRDKDTGCLSKVKELAVEVRKPAVKEAQS  
ENALKNPKEATLPTAVSSKMKIKNKNKNGRIVIVMSKYMDSNVHGAADKDRDSSKEDKAQSTKPSDHLESSIPKE  
ICNSRPIVAEHLKCSPKDRHFSKPSPTAEYNTAVARGQADLPEDMPLQLTASSPPTSWTADTNIPMTAVDQIR  
IPSPFGDRKRKLSDPVEDRSKVFSLASRSLSVPCSAVAPPQDKPMDLHCSGPRDSRPTCEAEGSQDEPMDLSCHKNRK  
QVEAETQPVQVDPQPTVKDTPPVHEDTQEPTDTSKEQENKKLSPFMGNIITDITTNLSLTITFKEYVPF

>Nfu\_LOC107395725

MELPAAGEHVFAVESIEKKRSRKGVEYLVKWRGWSPRYNTWEPEENILDPRLLDAFEDRERQEQLMGYRKRGPCKPH  
VLVQVPSFARRSTILADLQESSLEDNQCQSSPIQMICPQVQYQLNSKKHHQYQPLCRESEQKNNGKKFYQLNSKK  
HHHYQPDCLKVHEPVFTKQVEVKAPELVNKGYNLPPALQQKWVRDKDSGCLTKVKDITMELKKLPADLNGHKEPEKVEA  
TEDASFPQSNVRSKLVKKNKNGRIVIVMSKYMENGMQAAAAATNGDAAEKSSQRADSSSIENHLAKMKLVKKLGLV  
NGFVKHSDKDKPAVLGSGLNGDGLKEKPSPLVGRTEETEQEKPEVRGQKGFLEDQPLQLTSSGASDERENRAGSGGLK  
PVGDLGGEDRDAKRLSRSISVNPVAVSPPLSVSTSQNLQTPAGLQDCGYVDQEEPMDLSMVKSRSSVCSATATEM  
QTEAVTQTEPQTETHNASEDSSNHRTTKDETFPSFQPCLGNIIVTIDITTNCLTITFKEYVAA

>Nfu\_Cbx6 (Gene ID: 107375179)

MELSAAGDRIFAEEAILKRRVRKGRLEYLVNWKGWAMKHSTWEPEENILDDRLLILGFEQKEREREMSGPKKRGPKPKN  
LAMKTQTPKGETSSRASSSRQNTPRLSLSTSSRAAFSSAPAPNLPSSSSSSSNMGPTPKLNSLAATHKLKDIHRCHR  
MSRRPLPRSDPMASYSYSTSGGFPSRMHVSPFSETVRILNRRVKPREVKRGRIILNLKVIKPSRGSTGAKNITTGRQNI  
PSRNRIIGRKGEAPYRFPQPLKMLGFPYMGKPFGLQCGGPMFSFYSHMGSCSTTGARNSHSTSSYQAPPSPSSSSGS  
EGKSCNTNTAKLSPPPAEASPFSSKNKALAETQKNSPARVSSSDVNPGLVASSFLPSSPSSSLEDEEQSSMDHSAPSD  
TGKKNPRQHKAKHQSPSVLSPVTPAEQTPTSVEPQRVPAEGDPDWHPEMAPSKDVVVTVDVTNLVTVTIKEFPTPAS  
GPSSPSAGLENASSPAPVTVPEEPSSAKP

>Nfu\_LOC107388224

MELSAIGEQVFAVESIVKKRVRKGNVEYLLKWKGWPPKYSTWEPEEHIIDRRLLVQAFEEKEEKDRVVGHRKKGAKAKK  
LLLQSTVYTMDLRSAHKIPSKPSRRLRLSLRSLDHDNDDETWVACRLRSRTVHHKSKKTRSRNRCFDSTPSSSSQE  
DWDEEEEDQEEKQTSSESILNGQDVTDSWNTAAQTDNAASEKPWRPIAGPGEVTVTDVTLNSLTITFRESRVAKGF  
FRNWGLEVWQQ

>Nfu\_LOC107376332

MELSSIGDQVFAVESITKKRVRKGNVEYLLKWKGWPPPEYSTWEPEDNILDPLLVLAYEENQEKIRSLAYRKGLRPRK  
LMLRNIFAMDLRSASKDSEKPPRLRLSLTRSMSTDVEQLCRRPAGRRYRSRMTKLGSKRSSCKPIHLQKKKLDSPLK  
HWGEASEEDRPECESAAEEKCEDSCYGHSECSSPPFVERQDLVDVVEKVDDQLTPINTEMWNTADGGTTGTCQISAH  
EQPKDNALASEAKLGDAVVSLGDRLDFDGGETGVEAGSECETGVEAGSECPSVDSIPRERSNTTSVIVRVQDYASTGV  
KVEEGSANNQSVTMATSGPAEEERPEKIVITNVTVNSLTITFVEADGAEFFKGC

>Nfu\_LOC107395726

MELSAVGERVFAAESIIKRRIRKGRSEYLVKWKGWSHKYSTWEPEENILDSRLFVAFEQRERQRELFQPKKRGPKPKT  
FLLKAESQGNTRS YELRNEAIRGMDVTYSCEPVVTPRAREGLRTVVPTIFPPSAVNQGESICLRASDLVLEHQRSF  
HGDGSD E IHLPRKRGPKPKLLEDCELHERQAEPEVRRCALQLGEEMGLVVRVAHRHPENLSHKHHHPLSRPVSSRTS  
YYPFYSDNSRHTHTNLLDTHRTKDGSRCSAPAHFKHHSKVGPSRPAALPLMEKPYFLDRPSPTRIDADSVEMTWRPSI  
SNVEKVLVTDVTTNFLTVTIKESSTS KGFFRDKR

>Nfu\_LOC107376533

MELSAVGESVFAAESIIKRRIRGRWEYLVKWKGWSQKYSTWEPEENILDERLFAAFEERERERELFGPKKRGPKSES  
FLLKAKAKVKEKTYEFRRETTPRSIQVSYPIEHVVTPRAREGLRAVVPTIFPPSAVNRGESVPIRAPEPERRRPPIIP  
EALDPESMRLPKKRGRKPNLYYDEQDSSPEPCPKRSRFPEESKMSRMSYHGETSEQSLIQLTRRFQEETTITPKSSS  
ERRATSAGLACANAGVRKSDRERIYDLSRIRFSQCDNLKHEERGAEPSPSSATPWTPCFSSLDSVTVTDVTMNFVT  
IRESSTE KGF FKEKR

>Fhe\_Cbx2 (Gene ID: 105932784)

MEELSAVGEQVFDAECILNKRLRKGLEFLVKWRGWSSKHNSWEPQENILDPRLLAAFNKKEQEKELMLKRRKRPRG  
RPRKTIENIPEPEKSSSSSSASSSSSDSSSSSCSSSSSSDDEDEGDDGYVKQASPTVRPRELHPVPQKKAQIVMAKQ  
EPPRKRSRKPLPPEGKDFQNKGRPKVPKTAKEVDLPGAIAKKPVHPASF TFMGFHRSSGKDPVAGQYRSPLAQGGPAKG  
PVGSAGSGRPSVQTSSLPASKSNQSRNAEGLKSISSVNSGGSLDLKAAASKSGVAALNLTSKHPVQGTQTHTLSP  
PGGQKPHSPGSA LLRVPGA KGGASQPAKSASSNQGPSLQPLNLQNKQISDAPGGGATAPPGLRNPAPVARKTAVTQN  
LETDANKGPATSGRPARKPQPGGDKLREMNEIQ TAKVQARLDKIQSPDRDTATKGSKKAMTDMSTGEEESSSDSQ  
DSPYAGRAHPAAGQNQDWKPTRSLIEHVFTDVTANLVTVTVKESPTS VGFFSLRNY

>Fhe\_LOC105937668

MEGVTVGQVFDAECILSKRQRKGKFEYLVKWRGWSSKHNSWEPEENILDPRLLAAFHKREQERELLFQKKGKRPRGRF  
RKILPFAATKDSGSSSSSSSSGLSSEPSSSSSEDEEHVKAKPSRVHPVPQKRPQILLAKPDPPHKKKRGKPLHP  
DLKALRQAKSLPPPPPRHHQPIRSSRDDLPGVKKPLQPASFTY PGLSRSSSREEGSSSFQSSGSKPASLGCIWTD  
SLSSSSSSSHSKGSPSQKPSLRRSFSETGSGSRADAFKASLKPGGASAPPGLHGSFGGHAIAAQRPLAHRRQEGGQ  
TGLLQHKQONSSFSKQSPTPRERASQAANLRLNLQVRVSKLPPGAVLQGGPRSGKGAAGGQSRGPPSGGAGEPGRSR  
AQPAAGSRPEERKHGFPSSQGRSLNELSTGESDSSSESERDASPFDDSRPSGGGAAESDTE TDWRPARSLMEHV  
TDVTANFITVTVKESPTS VGFFSSRNH

>Fhe\_Cbx4 (Gene ID: 105940177)

MELPAAGEHVFAVESIEKKRSRKGRVEYLVKWRGWSRYNTWEPEENILDPRLLDADFQDRERQEQLMGYRKRGPKPKH  
LLVQVPSFARRSNILANLQGASLEDDGCQKSGPIQMIRPQAQQFQLNSRKLHQYQPLSREREAEQQSNGKKFFYELNS  
KKHHHYQPD LKLHEPVYKPRDIKAPELANKGYNLPAVLQQKWVRDKDSGCLTKVKDITMELKKLPADLNGQKGT  
KPKEDAS PQSNGVSGGKLKIVKNKNGRIVIVMSKYMENGMQTAKIKNADSDDAERPLQGAESSVERHLAKMKLVKQ  
LGLMNGFAKQPKDDPAVPGSGIKGDCCKQKELSLQAERTAKEQDRPTEVGGEGRLPQDQPLQLTNKLDLP  
SERGAPEK TGAQNRLHGLKRHLSDADAEHGC SKRFLSCRSISAPD TVDSPSR TAVVDQNGRQSPALQDQYGYQDQ  
DEPMDLSIVK SRPAPSACAEPETGTRAEHAHSHDDTHTHTDHTESQTETHEPSEEERADSASGSHQQARRDEAF  
PSFQPCLGNI  
TDITANCLTVTFKEYISA

>Fhe\_LOC105933040

MELPAAGEHVFAVEGIEKKRIRKGIYLVKWRGWSPKYNTWEPEENILDPRLLVAFQHRERQEQLMGYRKRGPKPKH  
LLLQVPSFARRSSIPGSFEETAQDAEGLKADPTQTPRSQPQQYQLNSKKHHQYQPSQEV PADALNNSKKKFIYQLN  
SKKHHHYEPDPHMYDAQVSRLKEVVKVQEPSPSKLANPGWTL PVALQQKWIRNKDTGCLSKVKELAVEVRKPVKEAPSE  
NALKPNPKEATLPSAVSSKMKIIKNKNKNGRIVIVMSKYMDGNKVHGAKDKHRDSPREEKTQSAEPSDSNPTARTKMT  
ELPENGIPKEICKGSSLSVAEHPLKCSPKDRHFSKPSPTAEYNT EVARGADLPEDLP LQLTASSPPTSWTADTTI  
PTPTAVDQIRIPSPFCDRKRKLSDPVEDRNVGKTYLASRSLSVPGASAAPPQDKPMDLHCGATRPSGTRATYGEDGSQ  
EEPMDLSFPRNRRQLEAEAPPQAEAPAVKDTTPAKENAQTPSEKAPE DPAKKVSPFMGNIITDITITNSLTVTTFKEY  
VAF

>Fhe\_cbx6a (ENSFHEG00000010219)

MELSAAGDRIFAAEAILKRRVRKGRLEYLVKWKGWAMKHSTWEPEENILDDRLLILGFEQKEREREMHGPKKRGPKPKN  
FVVKACGSKAEPPSSRASSRQNTSRSSSTSSRAAPSSSSAAPH TL PFSSSSSAPSPKLNSLAATHKLKKDIHRCHRM  
SRRPLPRSHPTGPAFSTPGGFPSRMHVSPFSETVRI LNRRVKPREVKRGRIILNLKVINKPGRGGAAAGSRNGQSGRQ  
NIPSRNRIIGRKGEAPYRPFQPLKMLGFPMYGPFGGLQCGGPMFSHSQTGSCSSAGARASSSSQ RQAPPPSSSSSN  
SSNAAAKPPQSDAEASKESKSSKAPPGTQKPSSASCSEANNKSPAPPSPSSSLEDQDEDAVDSSQASGGRNSPCQH  
KAKHQASAVPPVDPDQPSAPVEPQVRPAEGD PDWHPMEGPMCKDVVVTDVTTNLVTVTIKEFPSPASGPASPSASVE  
SASSPPPAATSEEPSVFPK

>Fhe\_LOC105930863

MELSAIGEQVFAVESILKRLRKGNVEYLLKWKGWPPKYSTWEPEEHILDRRLVQAFEDKEERDRVIGHRRKGA  
SKR LLLQDTVYTMDLRSAHKIPAKPPPRRLRLSLRSLVADEEDDETYVPCAAGSRIQLTHRKSKHRGPQSRCLNGTPPSPS  
REDWEEEEEEENSP ESEQRDEEEEQEAAQMEGAEMREGVFNHRD TDNWSTAAGANAATASE GLWRPIIGPGEVTVTD  
VTNLNSLTVTTFRESRVA KGF FRDWGLEV

>Fhe\_LOC105917993

MELSSIGEQVFAVESITKKRIRKGVHVEYLLKWQGWPPENSTWEPEDNILDPLLVMAYEENQEKLRSLSFRRKGLRPRK  
LVLRNIFGMDLRS AHKDNEKPPRLRLSLTRSMSTVEQVCRPARRRIRQRVTKAFPKHSSNKPIRDQRMEMEPMEK  
DWGGTSEEDKHGCESTTEERCDSLYGQSECSSPQFLEEMDVELEVVEEKAVCPDMWPDGGIFGTSPRHTNALEQSEEN  
TLAAEAEPGDVSPGDGSGWGEAKAVEACPECPQEKKKNATSVIVRVQGCCKTTGEAVSVTSDSELKKDEVRSNDQSV  
IVTASGRPAAPGEAPHRGKVIIVTNVTNCLTVTFKEAREAE GFFHGC

>Fhe\_Cbx8 (Gene ID: 105940179)

MELSAVGERVFAAESIIKRRIRKGRIEYLVKWKWGS PKYSTWEPEENILDSRLFAAFEQRERERELYGPKKRGP KPKT  
FLLKAQAKVKTKFYEFRR EAVRGMHITFTPEPVFTPRAREGLRAVVPTIFPPSSVNRGESVVRPSEPSPEHRHPPLQ  
QAASDGHAAHTPKKRGP KPKPRFVDDGFGPAASEPHRRRAEEGESHGAYRLAQFQEDEETRLQKSAHRHSENHAHVHKH  
HHHHQHHSYSHRHHHTQKASSGASYKHFAHQRCADPHRTKDGS AHLAAAHFHKHRPRTGQNPSRAAGPPPTEKPYFLD  
RRSPARLEDGQDDATWRPCLSNAEKVLVTDVTANFLT VTIKESSTSGGFFKDSR

>Fhe\_LOC105933049

MELSAVGESVFAAESIIKRRIRGRWEYLVKWKWGSQKYSTWEPEENILDERLFAAFEERERERELFGPKKRGP KKPET  
FLLKAKAKSKEKTYEFRR ETPRGIQVSYPVPEPVITPRAREGLRAVVPTIFPPSAVNRGESVPIRHPEPERRRPPAAS  
EAFLDQESVQFPRKRGRKPKLLPHYGPQDASGSAEPASKRSRSL EEQSVVSRRLLHHHGETSDHTLLQLTKRFQEETI  
TPKSGSEQRHAGLSYTCAFSPSARKSEGHRTYSLRSMHFPQHGGQPRRPEDERRRQAAAESSPPDPFAPSAPTWTPCCT  
NWDTVTVTDVTMNL LTVTIRESSTA KGGFFKDKR

>Kma\_Cbx2 (Gene ID: 108237824)

MEELSAVGEQVFD AECILNKRLRKGL EFLVKWRGWSSKHNSWE PQENILDPRLLA AFNKKEQEKELLMLKRGKRPRG  
RPRKILENVPEPSKSSSSSSSSSSSSCDSSSSSSSSSSSSSSDDDDDESHVKQPSPAVRTRELHPVPQKKAQIVMKQEPQ  
KKRSKKPPEAKEFLQSKSPRKILKTTKDPDLPGA IKKPVHPSSFTFMGFHRSSARDVVAQYRSPVQGGAVKMSSVGP  
SRSPVQTPSLPLNRTSQIRSGTEGKLSISSMNSGASLDLKTAA CKSKGVAALNLNTSKHPIQGSTQHTLSPPSGHKKP  
PAPVSTVQRT PSTKAVASSQSGSPQPLNLQNK KSLGPGTPASDLRGPSNPARKTTVPQSQESNPPKSPVIPGRLLAR  
KAPPVGD KDGNEIQSNKVQGR LDKSCPDIONQQER IPTKGSKKAKITEMSTGEEESSSDSDPDDSCAGQGHVSQNQD  
WKPTRSLIEHVFTDVTANLVTVTVKESPTS VGFFSIRNY

>Kma\_LOC108249256

MDGVTVGQVFD AECILSKRQRKGKFEYLVKWSGWSSKHNSWEPEENILDPRLLA AFHKREQERELLFQKKGKRPRGRF  
RKILFPFAAMKDARSSSSSSGLSSSPSSSSSEEEEEEEEEEDDEEHMKKAKPSR LHPVPQKRPQIILAKPDPPRKK  
KRGKKPLHPDLKALRPPLPRHHQPIRSLREDPRPGVKPLQPASFTYTGLSRTSRDEGTSSPQSSFSQSASKPGALS  
CIWTRGRSLASSSSHKTGPSHRNSELRRSVSETGSGFGKSLKAGGASASLHSSFGGGPTAPQRPPLGPRRQEGAGGPQ  
NSTFSSPTPRDRASQALSLRALNLQSVSSSLGGNPDPRGAGIGORSALTAGGAAEPGRGREAGSRQEERKHGSSSQNR  
SLNELSTGDSDETSSSESEHDATMFPDNSRPSLGTSAADSDTE TDWRPARSLLEHVFTDVTANF ITVTVKESPTS VG  
FFSSRNH

>Kma\_Cbx4 (Gene ID: 108245485)

MELPAAGEHVFAVESIEKKRSRKG RVEYLVKWRGWSPRYNTWEPEENILDPRLLD AFQDRERQEQLMGYRKRGP KPKH  
LLVQVPSFARRSNVLADLQETSLEDDDCQKSSPIQMLRPQAQQYQLNSKKHHQYQPLCREREAEQQANGKKFYQLNS  
KKHHHYQPD LKVHEPMFAKPQEVKAPELANKGYNLPPVLQQKWVRDKDSGCLTKVKDITMELKKLPADLNEHKEPEKV  
KTKEDAS AQANGVSGSKLIVKNKNKNGRIVIVMSKYMENGMQATSKNGDPETAERS PQGTDSSVEKHLTKMKLIKK  
LGLVNGFAKLPTDKPAVLGSELNGESLPKKEQLLR IEQTVTEQDKHDEV RGGGGLPEDQPLQLTSKPNLPSSDKGGSQ  
AGFQGLKRPFSDTDGEEHGANKRFLSCSSSNMVSSPSQCAIDQNGHQSRAGLQDCGYTEQE EPIDLSIVKPRPLICS  
ATPAEVLTLPHIETQTQTETHKPPQESSESDSNHKTRKDET FPSFQPF LRNIVITDITANCLTVTFKEYVTA

>Kma\_LOC108239245

MELPAAGEHVFAVEGIEKKRIRK GKIEYLVKWRGWSPKYNTWEPEENILDPRLLV AFQHRERQE QMMGYRKRGP KPKH  
LLLQVPSFARRSSI PAGFEETSQDAEAMLKPDVQVQRSQPQQYQLNSKKHHQYQPN SQEVPADQLANSRKKFIYQLN  
SKKHHHYEPDPHMYDAQASRLKEVVKVQEPASKPANPGWNLPLALQQKWIRDKDTGCLSKVKELAVEVRKPAIKEAQS  
ENALKPNPKDAMLPSA ISSMKMIKKNKNGRIVIVMSKYMDSNKVHGAKDKHRESSKEEKPQTVKPPENNP TLRTKM  
LEHLESGISKAICNGRSISVAEHPIKCSPKDRHFSKPS PSTAEYNT EVARGQADLPEDLPLQLTASSPPTS WTADTS  
IPTPTAVDQIRIPSPFGDRKRKLSDPVEDRNF GKVYLMSRSLSVPCSAVAPPQDKPMDLHCSGPRLSSTSTYDVEESQ  
EEPMDLSYPKNRKQVETEAPPQSEPEPAVKDTPPGQEDAQKTTEKSKEAPAKKASPFMGNI IITDITNSLTVTFKEY  
VPF

>Kma\_Cbx6 (Gene ID: 108231568)

MELSAAGDRIFA AEAILKRRVRKGRLEYLVKWKGWAMKHSTWEPEENILDDRIL LGFEQKEREREMHGPKKRGP KPKH  
LAAKTRGKGETSSSRASSRQNTSRSSSTSSRAAPSSSASLPNLPSSSSSSSTVAPSPKLNSLAATHK LKKDIHRCH  
RMSRRPLPQSNPMATSFSSPGGFPSRMHVS PFSETVRILNRRVKPREVKRGRIILNLKVIDKPSKGGAAGARNMAAG  
RQNI PSNRNIIGRKGEAPYRPFQPP LKMLGFP MYGKPFGLQC GGPM SFHSHPGSRTSSGARNSHSTSSH YQAPPSPSS  
SSGSEGKSQPAAKASPPSKDSKSGKALTETPKSPSAPASSDANPGALACSSLPSSPSSSLEDEEQGSTDFSLPSEAG  
RKNPQRRAKNQPPSTLPPGT PGEQTPAPAEPQRVPAEGD PDWHPEMAPSCKDVVVTDVTNLVTVTIKEFPSPASGP  
SSPSAGPEGASSPPPPVTPSEDPSVPKP

>Kma\_LOC108236253

MELSSIGDQVFAVESITKKRVRKGNVEYLLKWQGWPEYSTWEPEDNILDPLLVMAYEENQEKIRSLAYRKKGRLPRK  
LVLRNIFAMDLRSAHKDAEKPPRLRLSLTRSMSTDVEQAI RRPSSRRNRRLRLTKRSFNKPVLQQQQQKKVDSMQKD  
WGSGSEEEKPECESAAEERCEDSCYQSEWSSPFFLEQQDLDEVEVEVEVEEKVDQQAETCADRLDRGAPEQPKDITLV  
SEWPFGDAVSPGDGSEKDVEAGWEDGPRERNATLVIVRVQGSNVCATAEPQREQVDNHCVTITTTAGLFTVPAEAER  
PRKVI VTNVTN VNSLTVTFKEAKGPEGFFKSC

>Kma\_LOC108250439

MELSAIGEQVFAVESIVKKRVRKGNVEYLLKWQGWPPKYSTWEPEEHILDRRLVQAFKEKEERDRVIGHRRKGSKAKK  
LLLQNTVYTMDLRS AHKIP AQPPPR LHL SLMRSLVPGDEDGLYAACRLRPPPPQPHRKS KHRRSPHRC LNSSSPSSSQ  
ENLEEEESLAEDGEES EERQMDQKEAIKRGERDLNGQGGTDHWD SAVVPDASEKAWTPIIISPGQVTVTDITLNSLT  
VTFRESRVARGF FRDWGLEVWQQ

>Kma\_LOC108228443

MELSAVGERVFAAESI IKRRIRKGRIEYLVKWKGWSPKYSTWEPEENILDSRLFVAFEQREERELYGPKKRGP KPKT  
FLLKAQAKVKTRSYEFREAVRGITYPSPEPVVTPRAREGLRAVVPTIFPPSAVNRGESICLRPSELVHDHREAGSD  
GPRKRGP KPKPRLVDGSCGPSVSEPHKRRAEEQLSHGAHKLPKLPRGEEGNHKKHHVYHHHHHHHHC SQGRETSGGT  
SYRQLCSDRSLPPYKSDSHGPGGSGYLAPAHFKHHSKVSPGRPAAPPLMEKPYFLDRPSPTRLHDDLEEVTWRPSLS  
DVEQVLVTDVTANFLTVTIKESSTSGFFFRDKR

>Kma\_LOC108239259

MELSAVGESVFAAESI IKRRIRGRWEYLVKWKGWSSQKYSTWEPEENILDERLFAAFEERERERELFGPKKRGP KPKT  
FLLKAKAKAKERTYEFREAPRGIQVAYPIPEPVVTPRAREGLRAVVPTIFPPSAVNRGESVPVRPPEPERRPRPPPP  
DALMDQGST RYPPKKRGRKPKFHYEPQEAAGGSAEPASKMSRLLHHGETSEQSLLQLTRRFQEKTTITPKPTGERRHA  
GGLSYAFNRSARRGVQEGHRTYGLVSFHAPGRLRHPAEERAEP SQSESWTFC LSSWDSVTVT DVTMNF LTVTIRESST  
DKGFFRGKR

>Mze\_LOC101465599

MEGVTVGQVFDAECILSKRPRKGKFEYLVKWRGWSSKHNSWEPEENILDPRLLA AFHKREQERELLFQKKGKRPRGRF  
RKIQPAPTVTKDDRSSSSSSSSGLSSTASSSSSEDEEHTKKVKPAPRVHPVPQKRPQILLAKPDTPRKKRGRKPLHPD  
LRALRQAKSRPPPPPPPPGPRHHQLPRDEPRASVKKPLQPASFTYTGLSRSA REEAGSASQTSSASFSQASKPGGLGC  
IWTNRLSTSSLSSSSTS QNKATPTAQNKNSLSELKRSVPEIGRGDGFKVTPVKQGGASGSLGLHSSFGGAVVQRPL  
LAQRRQD GSGGQSGVAPHKHLSTSLSKPPSSASPSPRDRASQALSRLALNLQSVGKLPPTSGLQGSNTSGVAVARANP  
RSSSGSMVIKGGAKDARTGGGAPEQGMTKD KLTGGGAARGNSGVRQDGRKHVLG SQNRNLNELSTGDSDETSTSESET  
EDPLFPNSRPSRGN NATDSDTE TDWRPARS LLEHVFVTDVTANFITVTVKESPTS VGFFSSRNH

>Mze\_LOC101477503

MELPAAGEHVFAVESIEKKRSRKGRVEYLVKWRGWSPRYNTWEPEENILDPRLLD AFQDRERQEQMMGYRKRGPKPKH  
LLVQVPSFARRSSILADLQEA SLDEDSQNASPIQMLRPQPQHYQLNSKKHHQYQPLCREREAEQQANGKKFYQLNS  
KKHHHYQPD IKVHEPIFAKPKIDVQAPELANKEYNLPPVLQQKWVRDKDSGCLTKVKDITMELKKLPANFNHKEQEK  
PKPKEDALPQPNGVSSSKLIVKNKNKNGRIVIVMSKYMENGMQAAKVNGECDAAEKPPQGT DNGAEKHLEKMKLVK  
KLGLINGFAKSPVDKATSLSSGFNGNCPKEKEPSLKAELTVTEQDKHVEVRGQGQLPEDQPLQLTTKPNLLSRPLNRG  
VPSSQDKREGQGGFQGLKRHLSDTDGEERE GSKRFLSSRSISAPNTASSPVQSINIDQNGHSHPG LQDCGYVDQVEP  
IDLSTVKS RPKAPVPTAAQPETHTQPEALHTHEERQTEADTQTETQLETQQPAEVENAESLSVSNHEQKKEDTFPSF  
KPFLGNIVITDITTNCLTVTFKEYIAA

>Mze\_LOC101467610

MELPAAGEHVFAVEGIEKKRIRKKGIEYLVKWRGWSPKYNTWEPEENILDPRLLVAFQHRERQEQLMGYRKRGPKPKH  
LFLQVPSFARRSSI PAGFEETSQDAEGNLKS DPIAQQRSQPQQYQLNSKKHHQYQPSSQEVPGDQLASNKKKF IYQL  
NSKKHHHYEPDPNMYDTQASRLKEVVKVQEAASKPANPGWNLPLALQQKWIRDKDTGCLSKVKELAVEVRKPAVKEAE  
SEHALKPNPKDATLPSA ISSKMKI IKKNKNKNGRIVIVMSKYMDSNKVHGAKGKHGESSREDKPNMKTSEN NPAHATK  
LEEHLENGIPKEICNGSSLSVAEHP IKCSPKDRHFSKPSPTAE EYNTEVACGQADLPDDLPLQLTASSPMTSWAVDT  
NIPTPTAVDQIRIPSPFADRRKRLSDPVEDRSVSKIYLSRSFSVPSTVVTPPQDKPMDLHCNGPRQSGVCTYEDLGS  
QEEPMDLSCAPVTKKQAPAEKDPPEPAVKDAPPVETDTQISTEASKEAPVKKTS PFMGNIIITDITTNLTVTFKEYV  
SF

>Mze\_ENSMZEG00005006699

MELSAGDRIFA AEAILKRRVRKGRLEYLVKWKGWAMKHSTWEPEENILDDRIL LGFEQKERERELHGPKKRGP KPKNL  
VMKARGQKGESGRASNTRQTTLRPTSSTSNRASSSSSASAHLLPSSSSSAVAPSKLNSLAATHK LKKDIHRCHRM  
SRRPLPRTDPMATTF SNPGGFPSRMHVSPFSETVRILNRRVKPREVKRGRIILNLKVIDKAGRGTAAGGRNISAGRQ  
NIPSRNRIIGKKREAPYRPFQPPLKMLGFPMYGPFGQLQCGGPVPFHSHPSSCSSTGARESRTSPSQFQAPPSPSSSS  
GSEGSPTNATAAQSPSTGASPSKDPKSSKPHADTQKSQSTKSSTPAASSDANQAASSSPFLPSSPSSSLEDEED  
EGAPDRTPVSEGRKNPRQCRAKHQLPTALPPATPGDQTSAPTEPPRVPAEGDPDWHPEMAPSCKDVVTVTDVTNLVIT  
VTIKEFPSPASCASPSPASPENASSPPPTAASDDPSPAKP

>Mze\_Cbx7 (Gene ID: 101468311)



RMSRRPLPRTDPMATTFSSNPGGFPSRMHVSPFSETVRILNRRVKPREVKRGRIILNLKVIDKAGRGGAAGSRNISAG  
RQNIIPSRNRIIGKKREAPYRPFQPLKMLGFPYMGKPFGLQCGGPVPFHSHPGSCSSTGARESRTSPSQYQAPPSPSS  
SSGSEKGSPTNATAAQSQPSTGASPSKDPKSSKPHADTQKSQSTKSSTPAPSSDANQAASSPFLPSSPSSSLEDEE  
DEGAPDRTVPSEEGRNPRQRRAKHQLPIALPPTAPGDQTSAPAEQQRVPAEGD PDWHPPEMAPSCKDVVVTDVTTNLV  
TVTIKEFPSPASCASPSPASPENASSPPFVAASDDPSPAKP

>Oni\_Cbx7 (Gene ID: 102076083)

MELSAIGEQVFAVESIVKKRVRKGNVEYLLKWKGWPPKYSTWEPEEHILDRRLVQAYEEKEQRERALGPRRKGSKSKR  
ILLQNTVYTMDLRSAHKIPEKPEPRLRLSLTRSLLPEDDHQSYRQESQAQHRLRRKEFRCFNSNPPSPRQENWVEHGE  
EDEEEDEEEEEEENSMEDEDEDREEEQEETQKNTAKESNGILNGHERTDGWSATGPDEGTSE NIWRPVICPGEVTVTDI  
TLNSLTVTFRESRVAKGFFRDWGLKV

>Oni\_LOC100700457

MELSSIGDQVFAVESITNKRVRKGTVEYLLKWKQGWPKYSTWEPEDNILDPLLVLAYEENREKIRTLTYRRKGLRPRR  
PILRNVFAMDLRSAHKMTEKPPPRIRLSLTRSMSTDVDHVERGRMYQRQVRRNGRQRVAKGGRDSKRMHLQKKVEPME  
EDWGVTSSEEKSDSTMGERCEGSLYGLSECSSPALLEQHDLELEVEEKVDGDLMPVSSHTWIDVMAECDSTPKPMLVR  
SQSNSASASEATPGDAVSVDSDSDRGEEGWELVPERSNATSVIVSIRESRGTAGDAATVCSLAEVRKEEARGNDQ  
IVAPETASPTADQPETVILTQVINSVTVTTFKEARVAEGFFRGY

>Oni\_Cbx8 (Gene ID: 100712202)

MELSAVGERVFAAESITKRRIRKGRIEYLVKWKGSQKYSTWEPEENILDSRLFAAFEQRERELYGPKKRGPCKPT  
FLLKAQAKVKSKSYDFRSEAVRGMRTYPTPEPVATPRAREGLRAVPTIFPPSTVNRGESVVRPPELSPREHHQSL  
LHQNTNSEELIHIPKKRGPKPKPRFNDGFSEHHKRAEEQESHGPHKLAKLQGGEDMRLVKLAHRHPENHGHSHKHHYH  
HHHHHHHHTQSRGESSYKQLYSDRGLHPHRTDMDTHRMKDGSGLVPAHFKHHSKMSLSRPAELTQMEKPYFLDRPSP  
TRLDDDLDEVTWRPSLGNVEKVLVTDVTANFLTQVTKESSTSKGFFKDKR

>Oni\_LOC100692384 / ENSONIG00000017182

MELSAVGESVFAAESITKRRIRGRWEYLVKWKGSQKYSTWEPEENILDARLFSAFEEREREMFPGPKKRGPCKPET  
FLLKAKAKAKEKTYEFREAPRGIQVSYPIPEPIITPRAREGLRTVVPTIFPPSAVNRGESVHIRPPEPERRPRTTPA  
AALTQVESQQFPKKRGRKPKMMHMYDKDDGSSSAEPDAKRSKFIKEPTSHHSRRPHHHGETSDHCLMQITKRFQEETT  
ITPKSHSEQRHLGGAGFSYPCALASDLRKSEQGRHRTHCLNMKRPAANEYSLPREQAAVTPSHTDSIHDSSEHPASSW  
TPCF AHLDTVTVTDVTINFLTQVTVRESSTDKGFFKDKR

>Hbu\_LOC102307411

MEELSAVGEQVFDACILNKRMRKGKLEFLVKWRGWSSKHNSWEPEENILDPRLLAAFNKKEQEKELLRKRGRKPRG  
RPRKILENMPEAPKSSSSSSSGSSSSSSSDSSSSSSSSSSSSDDDDDDGGQVKQVSPSVRTRELNPVPQKKAQIVMAKQ  
EPPKKRSRKPLPSEVKEFQONKGPRKTAKDTDIPGAIKKPVHPASFTEFMGFHRGSARDAVGGPNRSSLAQVGAVKNSL  
SSVSGSRPSVQPSLPLNKSSQSRNVTESKLPVSGMSSGTSLDLKAAPSKSKGVAALNLNTSKHPIQGTQHTLSSPN  
GQKKPAPVTTAQRIPGAATAASLPNSVSSNQGLQPLNLQNKLVQSSDAPGNGTAPVSGPRNAANPARKPVTQONQECKP  
PKSPATPGRQLQARKTQPGTDKRVENDIQASRVQGRLESGVHKSPTAQSQQDRSASKDGKKAKMNEMSTGEEESS  
DSDQDSSYAGQVAVQS QDWKPTRSLIEHVFTDVTANLVTVTVKESPTS VGFFSIRNC

>Hbu\_LOC102302910

MEGVTVGQVFDACILSKRPRKGKFEYLVKWRGWSSKHNSWEPEENILDPRLLAAFHKREQERELLFQKKGKRPRGRF  
RKIQPAPTPTVKDDRSSSSSSSGLSSTASSSSSEDEHTKKVKPAPRVHPVPQKRPQILLAKPDTPQKKRGRKPLHPD  
LRALRQAKSRPPPPSPPRHQQLPRDEPRASVKKPLQPASFTYTGLSRASAREEAGSASQTSSASFQASKPGGLGCIW  
TNRSLSSTSSSSSTSQNKATPTAQNKNSLSELKRSVPEIGRGGFKVTPKQGGASGSLGLHSSFGGAVVHRPLLA  
QRRQDGSQSGVAPHKHLSTSLSKPPSSASPSPRDRASQALSLRALNLQSVGKLPPTSGLQGSNTSGVAVARANPRS  
SGSGMVVKGAKDARTGGRAPEQGVTKDKLTGGGAARGNSGVRQDGRKHALGSQNRNLNELSTGDSDETSTSESETE  
ALFPSNSRPSRGNATDSDTE TDWRPARSLLEHVFTDVTANFITVTVKESPTS VGFFSSRNH

>Hbu\_Cbx4 (Gene ID: 102295423)

MELPAAGEHVFAVESIEKKRSRKGRVEYLVKWRGWSPRYNTWEPEENILDPRLLDFAQDRERQEQMMGYRKRGPCKPH  
LLVQVPSFARRSSILADLQEAASLDEDSQNASPIQMLRPQPQHYQLNSKKHHQYQPLCREREAEQQANGKKFYQLNS  
KKHHHYQPDIKVHEPIFAKPKIDVQAPELANKEYNLPPVLQQKWVRDKDSGCLTKVKDITMELKKLPANFNHKEQEK  
PKPKEDALPQPNGVSSSKLIVKNKNKNGRIVIVMSKYMENGMQAAKVKNGECDAAEKPPQGTDNAGAEKHLEKMKLVK  
KLGLINGFAKSPVDKATTLSSGFNGNCPKEKEPSLKAELTVTEQDKHVEVRGQGQLPEDQPLQLTTKPNLLSRPLNRG  
VPSSQDKREGQGGFQGLKRHLSDTDGEEREGRSKRFLSSRSISAPNTASSPVQIINIDQNGHSHPGLDQCGYVDQVEP  
IDLSIVKSRPKAPVPTAAQPEHTQPEALHTTEERQTEADTQTETQLETQQPAEVENAESLSVSNHEQKK EDTFPSP  
KPF LGNIVITDITTNCLTVTFKEYIAA

>Hbu\_LOC102309824

MELPAAGEHVFAVEGIEKKRIRKKGKIEYLVKWRGWSPKYNTWEPEENILDPRLLVAFQHRERQEQLMGYRKRGPCKPH  
LFLQVPSFARRSSIAGFEETSQDVEGNLKS DPIQAQQRSQPQQYQLNSKKHHQYQPSQEVPGDQLASNKKKFIYQL  
NSKKHHHYEPDPNMYDTQASRLKEVVKVQEAASKPANPGWNLPALQKQWIRDKDTGCLSKVKELAVEVRKPAVKEAE  
SEHALKPNPKDATLPSAISSMKMIKKNKNKNGRIVIVMSKYMDSNKVHGAKGKHGESSREDKPNMKTSENNPAHATK  
LEEHLENGIPKEICNGSSLSVAEHPKICSPKDRHFSKPSPTAEYNTVEVARGQADLPDDLPLQLTASSPMTSWAVHT



NIPTPTAVDQIRIPSFADPDRKRKLSDPVEDRSVSKIYLSRSFSVPSTVVTPPQDKPMDLHCNGPRQSGVCTYEDLGS  
QEEPMDLSCPCKTKKQAQAEPTPEPEPAVKDAPPVTEDTQISTEASKEA **PVKKTSPFMGNIITDITTNLSLTVTFKEYV  
SF**

>Hbu\_Cbx6 (Gene ID: 102311013)

MELSAAGDR **IFAAEAILKRRVRKGRLEYLVKWKGWAMKHSTWEPEENILDDRILGFEQKER**ERELHGPKKRGPKPKN  
LVIKARGQKGESGSRASNTRQTTLRPTSSTSNRAASSSSSASAHLLPSSSSSAVAPSPKLNLSLAATHKLKDDIHRCHR  
MSRRPLPRTDPMATTFSPNPGGFPSRMHVSPFSETVIRILNRRVKPREVKRGRIILNLKVIDKAGRGGAAGGRNISAGR  
QNIPSRNRIIGKKREAPYRPFQPPPLKMLGFPMYKPFGLQCGGPVPFHSHPGSCSSSTGARESRTSPSQFQAPPSPSSS  
SGSEKSPNTATAAQSPSTGASPSKDPKSSKPHADTQKSQSTKSSTPAASSDANQAASSSSPFLPSSPSSSLEDEE  
DEGAPDRTVPSEEGRNPRQCRAKHQLPTTLPLAAPGDQTSAPTEPPRVPAEGD **PDWHPEMAPSCKDVVVTDVTTNLV  
TVTIKEFPSP**ASCPASPSASPENASSPPPTAASDDPSPAKP

>Hbu\_Cbx7 (Gene ID: 102304092)

MELSAIGEQ **VFAVESIVKRRVRKGNVEYLLKWKGWPPKYSTWEPEEHILDRRLVQAYEEKEQ**RERALGPRRKGAKSKR  
ILLQNTVYTMDLRSAHKIPEKPAPRLRLSLRSLPEDDHQPYRQESQHRRLRKEFRCFHSNPPSPRQENWEEHGEED  
EEDDEEEENSMEDEDEDEEEQETQKNTAKESDGI LN GHERTDGWSSTGPDGTTSE **NIWRPVICPGEITVTDITLKS  
LTVTFRESRVA**KGFFRDWGLKV

>Hbu\_LOC102302921

MELSSIGDQ **VFAVESITNKRVRKGAVEYLLKWKQGWPKYSTWEPEDNILDPLLVLAYEENRE**KIRTLTYRRKGLRPRR  
PILRNVFAMDLRSAHKMTEKPPPRIRLSLTRSMSTDVDHVEHGSYQVRNRNGWQVRVAKGGRDGKRMHLQKKKMEPM  
EEDWGGTSEEEKSESTMGERCEGSLYGLSECSSPALLEEHDLELQVGEKLGGLDMPVSSHTWIDIMGECDSTPKPMLV  
RSQKSDSTSASEARLGDAVSVDSDSDRGEEGWESGPERSNATSVIVSIRGSRGTAGDAATVCSLAEVRKEEARGDD  
SIVAP **ETASPTADQPKTVILT KVTINSVTVTFKEARVA**EGFFKGY

>Hbu\_Cbx8 (Gene ID: 102295731)

MELSAVGER **VFAAESI IKRRIRKGRIEYLVKWKGWSPKYSTWEPEENILDSRLFAAFEQRE**ERELYGPKKRGPKPKT  
FLLKAQAKVKSKSYDFRSEAVRGMRTVYPTPEPIATPRAREGLRAVVPTIFPPSTVNRGESVVRVPELSPREHQQL  
LHTSSEDLIHIPKKRGPKPKPRFNEVFSEHHKRRGEEQESHGPHKLAKLQGGEDMRLVKLAHRHPENHGHSHKHHYHH  
HHHHHHHTQRSGESYKQLYSDRGLPHRTHMDTHRIKDVSAYLVPAHFKHHSKMSLSRPAELPQMEKPYFLDRPSPT  
RLDDDLDE **VTWRPSLGNVEKVLVTDVTTNFLT VTIKESSTS**KGFFKDKR

>Hbu\_LOC102309508

MELSAVGES **VFAAESI IKRRIRGRWEYLVKWKGWSQKYSTWEPEENILDARLFSAFEERER**EREMFGPKKRGPKPET  
FLLKAKAKAKEKTYEFREAPRGIQVSYPPEPIITPRAREGLRTVVPTIFPPSAVNRGESVHIRPPESERRPRTTPA  
AAQQFPKKRGRPKPMHMHYDKDDGSSSAEPDSKRSKFTKEPTSHHSRRPHHHGETSDHCLMQLTKRFQ **QETTITPKSH  
SEQRHLGGAGFSYPCALASDLRKSEQGRHRTCLSMKRPAANENSLSREQASPSHTDSTHESSEHPA** **SSWTPCFAHLD  
TVTVTDVTLNFLT VTVRESSTD**KGFFKDKR

>Nbr\_LOC102797064

MEGVTVGQ **VFDAECILSKRPRKGFEYLVKWRGWSSKHNSWEPEENILDPRLLAAFHKREQ**ERELLFQKKG **KRPRGRF  
RKIQPA**PTVTKDDRSSSSSSSGLSSTASSSSSEDEHTKKVKPAPRVHPVPQKRPQILLAKPDTPR **KKKRGKPLHPD  
LRALRQAKSRPPPPSPPGPRHHQLPRDEPRASVKPLQPASFTYTGLSRSSREEAGSASQTSSASFQASKPGGLGC  
IWTNRSLATSSLSGSTSQNKATPTAQNKNSLSELKRNVEIGRGDGFKVTPLKQGGASGSLGLHSSFGGAVVQRPL  
LAQRRQDGGSGGQSGVAPHKHLSTLSKPPSSASPSPRDRASQALSRLALNLQSVGKLPPTSGLQGSNAGVAVARANP  
RSSGSGMVVKGAKDARAGGGAPEQKDKLTGGGAARGSSGVRQDGRKHALGSQNRNLNELSTGDSDETSTSESETED  
ALFPSNSRPSRGNNAATDSDTE **TDWRPARSLLEHVFTDVTANFITVTVKESPTS**VGFFSSRNH**

>Nbr\_LOC102782953

MEELSAVGEQ **VFDAECILNKRMRKGKLEFLVKWRGWSSKHNSWEPEENILDPRLLAAFNKKEQ**EKELLRKRGRKPRG  
RPRKILENMPEAPKSSSSSSGSSSSSSDSSSSSSSSSSSSDDDDDDQVKQVSPSVRTRELNPVPQKKAQIVMAKQEP  
PKKRSRKPLPSEVKEFQQNKGPRTAKDTPDIPGAIKKPVHPASFTFMGFHRGSARDTVGGPNRSSLAQGVAVKNSLSS  
VGSRPSVQPSSLPLNKSSQSRNVTESKLPVSGMSSGTSLDLKAAPSKSGVAALNLNTSKHPIQGTQHTLSSPNGQ  
KKPPAPVTTAQRIPGAKTAASLPSNVSSNQGLQPLNLQNKLVQSNAPNGGTAPASGPRNAANPARKPVTQNOECKPP  
KSPATPGRPQARKTQPGTDKRVENDIQASRVQGRLESGVHKSPTEAQSQQDRSASKDGKKAKNMENSTGEEESSD  
SDQSSYAGQVAVQS **QDWKPTRSLIEHVFTDVTANLVT VTVKESPTS**VGFFSIRNC

>Nbr\_LOC102794988

MELPAAGEH **VFAVEGIEKKRIRKGRKIEYLVKWRGWSPKYNTWEPEENILDPRLLVAFQHRER**QEQLMGYRKRGPCKPH  
LFLQVPSFARRSSIAGFEETSQDAEGLKSDPIQAQQRSPQYQLNSKKHHQYQPSQEVPGDQLANNKKKFIYQL  
NSKKHHHYPEDPNMYDQASRLKEVVKVQEAASKPANPGWNLPLALQKQWIRDKDTGCLSKVKELAVEVRKPAVKEAE  
SEHALKPNPKDATLPSAISSKMKI IKNKNKNGRIVIMSKYMDSNKVGAKGKHGESSREDKPNMKTSENNPAHATK  
LEEHLENGIPKEICNGSSLSVAEHPIKCSPKDRHFSKPSPTAEYNTFVARGQADLPDDLPLQLTASSPMTSWAVDT  
NIPTPTAVDQIRIPSFPPDRKRKLSDPVEDRSVSKIYLSRSFSVPSTVVTPPQDKPMDLHCNGPRQSSVCTYEDLGS  
QEEPMDLSCPCKTKKQAQAEPTPEPEPAVKDAPPVTEDTQISTEASKEA **PVKKTSPFMGNIITDITTNLSLTVTFKEYV  
SF**

MELPAAGEHVFAVESIEKKRSRKGRVEYLVKWRGWSPLYNTWEPEENILDPRLLDAFQDRERQEQMMGYRKRGPKPKH  
LLVQVPSFARRSSILADLQEASLDEDDSCQNASPIQMLRPQPQHYQLNSKKHHQYQPLCRERAEQQANGKKFYQLNS  
KKHHHYQPDIKVHEPMAFAKPKIDVQAPELANKEYNLPPVLQKQWVRDKDSGCLTKVKDITMELKKLPANFNHGKEQEK  
PKPKEDALPQPNGVSSSKLKIVKNKNKNGRIVIVMSKYMENGMQAAKVKNGECDGAKEPPQGTDSGAEKHLEKMKLVK  
KGLINGFAKSPVDKATSLSSGFNGNCPKEKEPSLKAELTATEQDKHVEVRGGQLPEDQFLQLTTPKNLLSRPLNR  
VPSSQDKREGQGQGLKRLHSLDTGEEREGSKRFLSSRSISAPNTASSPVQISINIDQNGHHGHPQLQDCGYVDQVEP  
IDLSIVKSRPKAAVPTTAQPEPTHQPEALHTEERQTEADTQTETQLETQQPAEEENAESVSNHEQKKEDTFPSFKP  
FLGNIVITDITTNCLTVTFKEYIAA

MELSAAGDR **IFAAEAILKRRVRKGRLEYLVKWKGWAMKHSTWEPEENILDDRILILGFEQKER**ERELHGPKKRGPKPKN  
LVMKARGQKGESSRASNTRQTTLRPTSSTSNRAASSSSASAHPLPSSSSSAVAPSPKLNLSLAATHKLKDDIHRCH  
MSRRPLPRTPDMATAFSNPGGFPSRMHVSPFSETVRILNRRVKPREVKRGRIILNLKVIDKAGRGGTAAGGRNISAGR  
QNIPSRNRIIGKKREAPYRPFQPPPLKMLGFLPMYGPFGQLQCGGPVPFHSHPGSCSSSTGARESRTSPSQFQAPSPSSS  
SGEGESKPTNATAAQSQPSTGAPSSKDPKSSKPHADTQKSQSTKSSTFAASSDANQAASSSSPFLPSSPSSSLEDEE  
DEGAPDRTPVSEEGRKNRQCRVKHLPIAPSPAAGDQTSAPAEPPRVAEGD **PDWHPEMAPSCKDVVVPDVTNNLV**  
**TVTIKEFPSP**ASCSPASPASPENASSPPPTAASDDPSPAKP

MELSAIGEQVFVAVESIVKKRVKGNVEYLLKWKGWPPKYSTWEPEEHILDRLVQAYEEKEQRERALGPRKKGSKSR  
ILLQNTVYTMDLRSAHKIPEKPAPRLRLSLTRSLLPEDDHQPYRQESQHRLRRKEFRCFNSNPSPRHENWEEHGEED  
EEEEEEEEENSMEEDEDREEEQEETQKNTAKESNGILNGHERTDGWSSTGPDEGATSENIWRPVICPGEITVTDITL  
NSLTVTFRESRVAKGFFRDWGLKV

MELSSIGDQVFAVESITNKRVRKGAVEYLLKWQGWPKYSTWEPEDNILDPLLVLAYEENREKIRTLTYRRKGLRPRR  
PVLNRNVFAMDLSAHKMTKEKPPPIRLSLTRSMSTDVDHVERGSMYQRQVRRNGRQRVAKGGRDGRMHLQKKKIEPM  
EEDWGGTSEEEKSESTMGERCESGLYGLSECSSPALLEGHDLELEVGEKVGGLMPVSSHTWIDIMGECDSTPKPMLV  
RSQKDSASASEARLGDVAIVSDRSDSDRGEEGWESGFERNATSIVISIRGSRGTAGDAATVCSLAEVRKEEARGDD  
SIVAPETASPTADOPETVILTKVTINSVTVTFKEARVAEGFFKGY

MELSAVGESVFAAESIIKRRIRRGWEYLVKWKGSQKYSTWEPEENILDARLFSAFEESHIRPPESERRPRTPPAAALTVQESQQFPKKRGRKPKMHMHYDKDDGSSSAEPDAKRSKFTKEPTSHHSRPHHHGETSDHCLMQLTKRFQEETTITPKSHSEQRHLGGAGFSYPCALASDLRKSERGRHRIHCLSMKRPAANENSLPREQASPSHTDSTHESSEHPASSWTPCF  
AHLDTVTVDVTLNFLTVTVRESSTDKGFFKDKR

MELSAVGERVFAAESIIKRRIRKGRIEYLVKWKGWSPKYSTWEPEENILDSRLFAAFEQRERELYGPKKRGPKPKPT  
 FLLKAQAKVKSKSYDFRSEAVRGMRVTYPTPEPIATPRAREGLRAVVPTIFPPSTVNRGESVVRVRPELSPREHQQSL  
 LHASSEDLVHIKPKRGPKPKPRFNDVFSEHHKRRGEEQESHGPHKLAKLQGGEDMRLVLKLAHRHPENHGHSHKHHYHH  
 HHHHHHHHTQSGESSYQLYSERGLPHRHTDTHRIKDVSAYLVAHFHKHHSKMSLSRPAELPQMEKPYFLDRPSPST  
 RLDDDLDEVTWRPSLIGNVEKVLVDVTANFLTVTIKESSTSGKFFKDKR

MEELSAVGEQVFDAECILNKRMRKGKLEFLVKWRGWSSKHNSWEPQENILDPRLLAAFNKKEQEKELLRLRKGKRPRG  
RPRKILENMPEAPKSSSSSSSGSSSSSSDSSSSCSSSSSSDDDDDDGGQVQVSPSVTRRELNPVPQKKAQIVMAQ  
EPPKKRSRKPLPSEVKEFQQNKGPRTAKDTDIPGAIKKPVHPASFTFMGFHRGSARDAVGGPNRSSLAQVGAVKNSL  
SSVSGSRPSVQPSSSLPLNKSSQSRNVTESKLPVSGMSSGTSLDLKAAPSKSKGVAALNLNTSKHPIQGTTOHTLSSPN  
GQKPAFAPVTTAQRIPGAKTAASLPVNSVSSNQLGPLNLNKLKVQSSDAPAGNGTAPVSGPRNAANPARKPVTQNOECKP  
KSPATPGRGLQARTQPGTDKSLREVNIDQASRVQRLERSGVHKSPTAQSQQDRSAGKDGKKAKMNMESTGEEESS  
ZSDQDSSYAGOVAVOSODWKPTRSLIEHVFTDVTANLVTVTKESPTQSVGFFSIRNC

MELPAAAGEHVFVAVESIEKKRSRKGRVEYLVKWRGWSPRYNTWEPEENILDPRLLDADFQDRERQEQMMGYRKRGPKPKH  
LLVQVPSFARRSSILADLQEASLDEDDSCQNASPIQMLRPQPQHYQLNSKKHHQYQPLCRERAEQQANGKKFFYYQLNS  
KKHHHYQPDIKVHEPIFAKPKIDVQAPELANKEYNLPPVLQQKWVRDKDSGCLTKVKDITMELKKLPANFNHGHEQEK  
PKPKEDALPQPNGVSSSKLKIVKNKNKNGRIVIVMSKYMENGMQAAKVKNGECDAAEKFPQGTDNGAEKHLEKMKLVK  
KGLLINGFAKSPDKATSLSSGFNGNCPKEKEPSLKAELTVTEQDKHVEVRGGQQLPEDQPLQLTTKPNLLSRPLNNG  
VPSSQDKREGQGFGQLKRHLSDTDGEEREGSKRFLSSRSISAPNTASSPVQSSINIDQNGHSHFGLQDCGYVDQVEP  
IDLSIVKSRPKAPVPTAAQPEPTHQTEALHTHEERQTEADTQTETQLETQQPAEVENAESLSVSNHEQKKEDTFPSF  
KPFLGNIVITDITNCLTVTFKEYIAA

MLFLPAAAGEHVFAVEGIEKKRKIRKGKIEYLVKWRGWSPKYNTWEPEENILDPRLLVAFQHRERQEQLMGYRKRGPKPKH  
LFLQVPSFARRSSI PAGFEETSQDAEGLKSDPIQAQQRSQPQQYQLNSKKHHQYQPSQEVPGDQLASNKKKFYIYQL  
NSKKHHHYEPDPNMYDTOASRLKEVVVKVOEAASKPANPGWNLPLALOOKWIRDKDTGCLSKVKELAVEVRKPAVKEAE

>Pny\_Cbx6 (Gene ID: 102193150)

>Pny\_Cbx7 (Gene ID: 102210279)

>Pny LOC102212884

>Pny\_Cbx8 (Gene ID: 102214806)

>Pny LOC102195395\*

>Aca Cbx2 (Gene ID:113020225)

>Aca LOC113027934

>Aca LOC113023624

MELPAAAGEHVFAVESIEKKRSRKGRVEYLVKWRGWSPRYNTWEPEENILDPRLLDAFQDRERQEQMMGYRKRGPKPKH  
LLVQVPSFARRSSILADLQEASLDESDSCNASPIQMLRPQPOHYQLNSKKHHQYQPLCRERAEQQANGKKFYYQLNS  
KKHHHYQPDIKVHEPIFAKPKIDVQAPELANKEYNLPPVLQQKWVRDKDSGCLTKVKDITMELKKLPANFNHGKEQEK  
PKPKEDALPQPNGVSSSKLKIVKNKNKNGRIVIVMSKYMENGMQAAKVKNGECDAAEKPPQGTDNAGAEKHLEKMKLVK  
KLGSLINGFAKSPVDKATSLSSGFNGNCPKEKEPSLKAELTVTEQDKHVEVRGGQQLPEDQPLQLTTKPNLLSRPLNRG  
VPSGDKREGQGQGLKRLHSLDTGEEREGSKRFLSSRSISAPNTASSPVQSSINIDQNGHSHPLGLQDCGYVDQVEP  
VDSIVKSRPKAPVPTAAQPEHTHQEALHTHEERQTEADTQTETQLETQQPAEVENAESLSVSNHEQKKEDTFPSF  
KPFLGNIVITDITTNCLTVTFKEYIAA

>Aca\_LOC113020834

MELPAAAGEHVFAVEGIEKKRIRKGI EYLVKWRGWSPKYNTWEPEENILDPRLLVAFQHRERQEQLMGYRKRGPKPKH  
LFLQVPSFARRSSIPAGFEETSQDAEGLNLSKDPIQAQQRSQPPQYQLNSKKHHQYQPSSEQEVPDQLASNKKKFIYQL  
NSKKHHHYEPDPNMYDTQASRLKEVVKVQEAASKPANPGWNLPLALQQKWIRDKDTGCLSKVKELAVEVRKPAVKEAE  
SEHALKPNPKDATLPSAISSKMKI IKNNKNGRIVIVMSKYMDSNKVHGAKGKHGESSREDKPQNMKTSENNPAHATK  
LEEHLENGIPKEICNGSSLSVAEHPKICSPKDRHFSKPSPTAEYNTAVARGQADLPDDLPLQLTASSPMTSWAVDT  
NIPTPTAVDQIRIPSPFADRRKRKLSDPVEDRSVSKIYLSRSFSVPSTVVTPPQDKPMDLHCNGPRQSGVCTYEDLGS  
QEEFMDLSCP KTKKQAPAETPPEPEPAVKDAPPVTEDTQISTEASKEAPVKKTSPFMGNI IITDITTNLSLTVTFKEYV  
SF

>Aca\_Cbx6 (Gene ID:113024612)

MELSAAGDRIFAAEA I LKRRVRKGRLEYLVKWKGWAMKHSTWEPEENILDDRLLILGFQKERERELHGPKKRGP KPKN  
LVMKARGQKGESGSRASNTRQTTLRPTSSTSNRASSSSSSASAHLLPSSSSSAVAPSPKLNSLAATHKLKDIHRCHR  
MSRRPLPRTPDMATTFSNPGGFPSRMHVSFFSETVRILNRRVKPREVKRGRI I LNLKVIDKAGRGGAAGGRNISAGR  
QNI PSRNRI IGKKREAPYRPFQPP LKMLGFPMYKGFPLQCGGPVFPFHSHPSSCSSTGARESRTSPSQFQAPSPSSS  
SGSEKSPSTNAAAQSQPSTGASPSKDPKSSKPHADTQKSQSTKSSTPAASSDANQAASSSSPFLPSSPSSSLEDEE  
DEGAPDRTPVSEEGRNPRQCRAKHLPTALPPATPGDQTSAPTEPPRVPAGEGPDWHPPEMAPSCKDVVVDVTTNLV  
TVTIKEFPSPASCPASPSASPENASSPPPTAASDDPSPAK

>Aca\_LOC113027596

MELSAIGEQVFAVESI VKKRVRKGNVEYLLKWKGWPPKYSTWEPEEHILDRRLVQAYEEKEQRERALGPRRKGA KSKR  
ILLQNTVYTMDLRSAHKIPEKPAPRLRLSLTRSLLPEDDHQPYRQESQHRLRTKEFRCFNSNPPSPRQENWEEHGEED  
EEEEDEEEGENSMEDDEDREEEQEETQKNTAKESDGILNGHERTDGWSSTGPDEGTTSENIWRPVICPGEITVTDITL  
KSHTVTFRESRVAKGFFRDWGLKV

>Aca\_LOC113021152

MELSSIGDQVFAVESI TNKRVRKGAVEYLLKWKQGWPPKYSTWEPEDNILDPLLVLAYEENREKIRTLTYRRKGLRPRR  
PILRNVFAMDLRSAHKMTEKPPPRIRLSLTRSMSTDVDHVEHGSYQQRQVRRNGWQRVAKGGRDGKRMHLQKKKMEPM  
EEDWGGTSEEEKSESTMGERCEGSLYGLSECSSPALLEQHDLQLQVGEKLGGLMPVSSHTWIDIMGECDSTPKPMLV  
RSQSKDSTSASEARLGDVSVSDRSDDRGEEGWESGPERSNATSVIVSIRGSRGTAGDAATVCSLAEVRKEEARGDD  
RIVAPETASPTADQPKTVILT KVTINSVTVTFKEARVAEGFFKGY

>Aca\_Cbx8 (Gene ID:113023623)

MELSAVGERVFAAESI I KRRIRKGRIEYLVKWKGWSPKYSTWEPEENILDSRLFAAFEQREERELYGPKKRGPKPKT  
FLLKAQAKVKSYSYDRSEAVRGMVITYPTPEPIATPRAREGLRAVVPTIFPPSTVNRGESVVRVPPELSPREHQSL  
LHTSSEDLIHIPKKRGPKPKPRFNEVFSEHHKRRGEEQESHGPHKLAKLQGGEDMRLVKLAHRHPENHGHSHKHHYHH  
HHHHHHHTQRSGESYKQLYSDRGLHPHRTDMDTHRIKDVSAYLVAHFKHHSKMSLSRPAKL PQMEKPYFLDRPSPT  
RLDDDLDEVTWRPSLGNVEKVLVTDVTTNFLT VTIKESSTS KGF FDKR

>Aca\_LOC113020844

MELSAVGESVFAAESI I KRRIRGRWEYLVKWKGWSQKYSTWEPEENILDARLFSAFEEREREREMFGPKKRGP K PET  
FLLKAKAKAKEKTYEFREAPRGIQVSYPIPEPI ITPRAREGLRTVVPTIFPPSAVNREGSVHIRPPELERRPRTTPA  
AAQQFPKKRGRKPKMHHYDKDDGSSSAEPDAKRSKLTNEPTSHHSRRPHHHGETSDHCLMQLTKRFQEETTITPKSH  
SEQRHLGGAGFSYPCALASDLRKSEQGRHMTCLSMKRPAANENSLPREQASPSHTDSIHESSEHPASSWTPCFAHLD  
TVTVTDVTLNFLT VTVRESSTD KGF FDKR

>Aci\_Cbx2 (ENSACIG00000010758)

MEELSAVGEQVFDAECI LNKRMKGL EFLVKWRGWSKSHNSWEPQENILDPRLLA AFNKKEQEKELELLRKRGKRPRG  
RPRKILVT SKSSSSSSSGSSSSSSSDSSSSSSSSSSSSDDDDDDSDQVKQVSPGLRTRDLNFPVPQKKAQIVMAKQEPKK  
RSRKPLPSEVKEFQONKGPHKTAKDSDIPGAIKKPVHPASFTFMGFHRGSARDTVGGPNRSSLTQVGAVKNSMSPVGS  
GRPSVQSASLPLNKASQSRNVTEGKLSVSGMSSGSLDLKAVPRTTQHTLSSPNGQKKAQAPVTTVQRTPNTKTVASL  
PSNVSSNQGLQPLNLQNKLVQSNVPGNGTAPVSGPRNAANPARKPTVTQNQEFNPPKSPATPGRVQARKTQPGADKV  
REVNEIQTSRVQSRLEKSGVHKSPTVEVQSQDRSASKDGKKAKMNEMSTGEESSSDSDQDSPYAGRVAVQSQDWKPT  
RSLIEHVFTVDVTANLVT VTVKESPTS VGGFFSIRNC

>Aci\_ENSACIG00000023237

GAGSCSMEGVTVGQVFDAECI LSKRPRKVS VGRGPVVLHNSWEPEENILDPRLLA AFHKREQERELLFQKKGKRPRGR  
PRKIQVKTLPVPVTVKDNRSSSSSSSGLLSSASSSSSEDEHTKKVKTGPRVHPI PQKRPQIMLAKPDPKRKKKRGRK  
PLHPDLRALKQAKSHPPPPPPAPRHHQISRDEPRSPVKKPLQPASFYTTGLSRASRDEASKPGSLSCIWNTNRSLSGS  
SPSSGSSSHNRATPSSQSKNSLSELKRSIPEAVRGDGFATPLKQGGTSGSLGLHSSFXGGSAVRRSPLGQRRQDGAG  
GQSTLVTHKQLNSSLKSPSSASPSPRDRASQALSRLALNLQSVSKPPSSIGLQGSNTSGAAVARASLRSSGSSSMVIK  
GGSGSTKNTRAGATEQGRVKEKLAGGAARGNGGRQDERKHGLGSQNRNLNELSTGDSEETSSSESEPEDTLFPSSS  
RPSLGNATDSDTE TDWRPTRSLL EHVFTVDVTANFITVTVKESPTS VGGFFSSRNH

>Aci\_ENSACIG00000019976\*

MELPAAAGEHVFAVESIEKKRSRKGRVEYLVKWRGWSPRYNTWEPEENILDPRLLD AFQDR

>Aci\_ENSACIG00000021421\*  
MDLPAAGEHVFAVEGIEKKRIRKGGKIEYLVKWRGWSPKYNTWEPEENILDPRLLVAFQLRERQEQMMGYRKRGPCKPKH  
PFFQVPSFARRSSIPTGLEETSQDAEANLKS DPIQVQQRSQPQQYQLNSKKHHQYQPSSQEI PGDQMWGNS

>Aci\_cbx6a (ENSACIG00000003935\*)  
MELSAVGDRVFAAEAILKRRVRKGRLEYLVKWKGWAMKHSTWEPEENILDDRILGFEQKERERELHGPKKRGPCKPKN  
FVTKVL RQTTSRPTSSTSSRAASSSSSSASPHHIPSSSSSTVAPSPKLNSLAATHKLKKDIHRCHMSRRPLRPTDPM  
ATTFTSTPGGFPSRMHVSPFSETVRILNRRVKPREVKRGRIILNLKVIDKAGRGTAAGSRNISAGRQNI PSRNRIIGK  
KGEAPYRPFQPPKLMLGPFMYGKPFGLQCGGAVPFHSPXGSCSSTGARDSRTTSSQYQSPSPSSSSSGSEKSPNTAT  
SAQSQPATRASPSKDPKSSKPHAETQKSQSTKPS TPAPSLDANQAASSSPFLPASPPSSSVEDEEDEGAPDRTTAYHL  
KHHTPTVKRGGGVVLQPDGHLAVIESSMNSFVFQSILESSVRLTPEAWSKLS DATGQ

>Aci\_ENSACIG00000010051\*  
MELSSIGDQVFAVESITNKRVRKGTVEYLLKWQGWPPKYSTWEPEDNILDPLLVLAYEEK

>Aci\_ENSACIG00000021398\*  
MELSAIGEQVFAVESVVKRVRKGVHVEYLLKWQGWPPKYSTWEPEEHILDRRLVQAYEEK

>Aci\_Cbx8a (ENSACIG00000021387)  
MELSAVGESVFAAESIIKRRIRGRWEYLVKWKGWSQKYSTWEPEENILDARLFSAFEEREREREMFGPKKRGPCKPET  
FLLKAKAKAKEKTYEFREAPRGIQVSYPIPEPVITPRAREGLRTVVPTIFPPSAVNRGESVHIRPPESERRRPRPTPP  
APPTVQESQRFPKKRGRKPKLHTHFDKDDGSSSAEPDAKRSKLMREPM SHHSRPPHHHGETSDHCLMLTKRFQEETR  
ITPKSNSEQRHLGGAGLSYSCALASRSSDQGRHRTHCLSMIPRPSKLLQHA AHDQVKEYSLPREQA AVTSSQIDSIHE  
QPASSWTPCFCTNLDTVTVDVTLNFLT VTVRENSTDKGFFKDKR

>Aci\_ENSACIG00000019984\*  
MELSAVGERVFAAESIIKRRIRKGRIEYLVKWKGWSPKYSTWEPEENILDSRLFAAFEQRPS LGNVEKVLVTDVTTNF  
LTVTIKESSTSKGFFKDKR

>Tru\_LOC101075336  
MEELSAVGEQVFDAECILNKRLRKGLLEFLVWKRGWSAKHNSWEPQENILDPRLLA AFNKKEHEKELLMRKKGKRPRG  
RPRKIL ENLPEPEKSSSSSSSGSSSSSSDSSSSSSSEDDEDEDGGQMNPSIRTRDPXPVPQKKAQIVMAKQEP  
LKRSRKPLPPDVKDFFQNKGP RRVLKTYQESSLPGTIKKPVHPASFTFMGFHRGSRDPAGVQTRSPLTPASSAGA QSV  
GRSGPSRSTDEGKTS GSGPGSGAALAKADA AKGEAQNSNSARISSPGTVQQTGSPSGPKRPPGPALLQRVPTSRA  
APSLPSRTSSGSLQPLNLQSKLVPARDATGNGTG PVRNAAAKSLVAPTREYSPPGRLQSRKNLQDKVPENTEIQNP  
KVQTRLDKSSIQKPAEVQQDRSAPKDGKKKNEL SAGEDESSSESDQDQNASVAVQNQDWKPMRSLIEHV FVTDVTANI  
VTVTVKESPTS VGFFSLRNY

>Tru\_LOC101071244\*  
MYPQQTATEGKVRVSGQVERLVVQAQQLGAGGKHGPA AASGVPQEERELLFQKKGKRPRGRPRKIPLFEVSPDPSS  
SSSSGLSEPSSDDEEQVKVKAGPRVQPGPQKRQIILLARPDLPRKKRGRKPLHPDLKAKNEPPPQPSRHHHLIRPQ  
RAELRPGIKKPLQPASFTYTGLARTSRDESSTSSSFHTSAKPGSVSGTWSNRSLVSCGSASFNRTPSPSPQH KMSLSE  
LKRSVLDTGIFKAVPLKNPSAASSLGLHGGFVGGQAVQRPPLSLRKQEGVGGASCLVQHKQQAALSKPSSLTAHRDR  
INQAFGLRTLNLHAVGRTPSSGSHQGNISGAGAATSRSSLRSNAGVVKGAERLKDTRTSAGQGRGLPAGGSDQRAA  
KETLAGGARLEDRLNLSRGVNEL SAGDSDESSSESEAAAAAYLSNSRRSLGDDTNE SDTE TDWRPARSLIEHV FVTDV  
TANFLT VTVKESPTS VGFFSSGGH

>Tru\_LOC101076082  
MEIPAAGEHVFAVENIEKKRSRKGRFEYLVKWRGWSSKYNTWEPEENILDPRLLD AFQERERQEQLMGYRKRGPCKPKH  
LLIQVPSFARRSSVLADIREVSLEEGRCPAKPAETLRPNQQYQLNSQKHHQYPPVCREQDGRQSSGKKFY YQLNG  
KKHHQYQPD LKVQGPLCAEALDVKALELPRQGCNLPPVLQQKWVRDKDSGCLTKVKDIAMELKKLPADLNGHKEPKNM  
GCAEEEPQSDAVSSSKL KIVKNKNKNGRIVIVMSKYMENGIHPAKTRAGDSEAAEPATPGTDGGAESHYEKMRLVRE  
LGLMNGFAKHKPTVPSSGFNGDGLERKQPPKSDPTVAERGKDVEVTGQQQLPADQPLQLTTKSNLLSVTPDRGAPPH  
GDRRGQGGLQALKRRLPDAASQEQQGVKRLVSSSGDSASSQSPEQERGFVDQEEPIDLRVLKPRPAEP PAGNAAEAP  
PAPERPTDRLESQ LQTEAPAAAE GAPPLSESRHEQRKEEFPSFQPLLGNIVITDITTNCLTVTFKEYVAA

>Tru\_LOC101075073  
MELPAAGEHVFAVEGIEKKRIRKGGKVEYLVKWRGWSPKYNTWEPEENILDPRLLVAFQHRERQEQLVGYRKRGPCKPKH  
LLLQVPSFARRSSI PAGLEETCQEADDNAKADPMEVQRPQPQQYQLNSKKHHQYQPSNQEVPTDQQMNGKKKLIYQLN  
SKKHHHYEPDLNMYEAQGSRLKEVVKVQESGSKPANPGWNLPLALQQKWVRDKETGCLSKVKESAVEARKPSVKDAES  
EHALKPNSKDASLPSSISSKMKIIKNKNKNGRIVIVMSKYMDNNKVHGAKAKHGETSSDMKAQSTKPPENNPAHSTKI  
VEYLENGIPKELCSARTLPVAEHMPKCPPKDRHFSKPS PSTAAEYNT EVARGQADLPDDLPLQLTASSPVT SWAPDTN  
IPTPTSLDHIRIPSFPKDRKRKLSDPVDHRSVSKAYLT SRSLSLPSTAVTPPQDTPMDLHCSGRRHSSACETVDSGGQ  
EEPMDLSFPKTKKPAEFVPLAPPAVETAPPDSDGAQKSVEKAAVKKISPFMGNIITDITTN SLTVTFKEYVSE

MMELSAAGDRIFAFAEAILKRRVRKGQLEYLVKWKGWAMKHSTWEPEENILDDRILILGFEKKEREERELHGPKKRGPKPK  
NIAAKGRGQKGETSSRNSNARQTASRSAPSTSNRPTSSSASPQHLPSPSSSAFAPSALNLSHAATHKLKKDIHRCH  
MSRRPLPRSDPMAGSFSTPGGLPSRLHVSFSETVRILNRRVKPREVKRGRIILNLKVIDKAGRGGSSVGSRNATAAGR  
QNIPSRNRIIGKKGEVYPYRPFQPPPLKMLGFFPMYGKPFQYGGPLAFHSSPATCSTTATRDTSASTQYQIPSPSSS  
CSSEGKCTPTSAAQSQPSECPKSSTPHAETQKGQNAEPPAPAPPADPASASLSPSSSSSLDGEKECVLDCSPPPQEC  
KNPHQFRAKHQPTGNPGDHTSPPAESKRVPAGEPDPDWHPEMAPSKQDVVVTDVTTNLVTVTTIKEFPSSHASPSAGED  
PSTPPPSASVDSPPSPKP

MELSAIGEQVFAVESIVKKRVRKGNVEYLLKWKGWPPKYSTWEPEEHILDQRLVQAYEEKEQRDRALGHRRKGSKTKR  
LLQNTVYTMDLRSAHKTPKPPRLHLSLTRSVSEDEEQLYDDCRQESEPEPEPAHRKVQFKCLNSPPSPAREDWG  
GEDEDKDNLDSEDDGEDDRESFKSGQEKTDWCSTIRSDEVLAEEVSDTEIWKPVIGPGEVTVTDITLNSLTVTFRES  
AVAKDFFREWSLKV

MELSSIGDQVFAVESITKKRVRKVQYLTGGQYFGPTACGLRAEEKIRALAYRRKGLRPRKLVLRNLFAMDLRSSHK  
EKPRPRLRLSLTRAMSTDIDQGERAGMFRRPLWRKNNRQASRKGPEGSPHRTICPLRKKKSLEEDWVATSEEDKQESN  
KNEDVLYDGGSKCSPPAFRQEQEDMDEETVDDTESTGTWTGDGCTGTPGQTQTACEQSKEDAFAAEVGP GDTGTACER  
SCWVLQGLQGQTEAAQHPAVCQSKAVSVIVCVSGCGEMPGDSVCVAAKEAGGDAAKEERLTSQVAAKYPGKVITTNVT  
INSLTVTFKEATAEGFFNGC

MELSAVGGERVFAAESIIKRRIKRGRIEYLVKWKGWSPKYSTWEPEENILDSRLFVAFEQRERELYGPKKRGPKPKPT  
FLLLKAQAKEKVKSYDFRSDSVRGMHISYPSPEPVAAAPRAEGLRAVVPITFPPSTVNRGESVRVHPSDACTRDLRLSS  
LQPGADGLGHFPKKRGPKPKLRFKDGCGCNPAAASERGRAEAPFVSQHAHQHAHQHAHQHAHQHAHQHAHQHAQHLQEG  
GKRLRLRVSHGHGHHHHHHHHHHHSANYPAPSQRPYRRFVSDRGLLAHRRDTDARRTQDGGSYHTATPPPRQRPATKP  
SRPAHLPLLDKPYVLDPKPSPTLTDLDQVTVWRPLSSVEKVLVDTVSNFLTIVTIKBSSTCGGFFAKAKR

MEELS AVGEQ V F D A E C I L N K R L R K G K L E F L V K W R G W S A K H N S W E P Q E N I L D P R L L A A F N K K E H E K E L L M R K K G K R P R G  
R P R K I L E N L P E P E K S S S S S S G S S S S S D S S S S C S S S S S E D D D E D E D G G Q M N P S I R T R D P X P V P Q K K A Q I V M A K Q E P F  
L K R S R K P L P P D V K D F P Q N K G P R R V L K T Y Q E S S L P G T I K K P V H P A S F T F M G F H R G S R D P A G V Q T R S P L T P A S S A G A Q S V  
G R S G P S R S T D E G K T S G S G P G S G A A L A K A D A A K G E A Q N S N S A R I S S P G T V Q Q T P G S P S G P K R P P G P A L L Q R V P T S R A  
A P S L P S R T S S S G S G L Q L P Q S K L V P A R D A T G N G T G P V R N A A A K S L V A P T R E Y S P P G R L Q S R K N L Q D K V P E N T E I Q N P  
K V Q T R L D K S S I Q K P A E V Q Q D R S A P K D G K K K N E L S A G E D E S S E S D Q D Q N A S V A V Q N Q D W K P M R S L I E H V F V T D V T A N I  
V T V T V K E S P T S V G F F S L R N Y

MEELSAVGEQVFDAECILNKRRLRGKLEFLVKWRGWSAKHNSWEPQENILDPRLLAFAFNKEQEKELLMRKKGKRPRGRPRKVLVSTAGSAGPTGVRLLSCPVFQENLPGPGKSSSSSSGYEGQVNPSIRTRDHPVPQKKAQIVMAKPEPPPKRSRKPFPDASKGPRRVLKTFFPEPGPGPTIKKPVHPASTFMGFHRGSGPIRSPLSSRSSGGVGRSGPGRNPDEGRTLSESLAPKADTKEAQNPTRTRSPSQGSAQHGGPSPETPTGTALQRTAEGAQAAPVLVPSKAASAPASAPQPLNLQSKFPVQAKDASHTASAPAKRSVAPNPDRSEYAAPAPGRLPSRKSILQKVPETAQKAVQKTRLDKSGVQKAAELHQDRSAADGKKKNEMSAGEDDESSESDDOSASAVONOGWKPARSLIBHVFTDVTANLVTVTKESPTSVGFFSLRPY

VMEGVTVGQVFDAECILSKRPRKGFEYLVKWRGWSSKHNWEPEENILDPRLLAAFHKCREQERELLFQKKGKRPRG  
 RPRKHPLFEVAADRSSSSSSSSGLSEFSSDDEEQVKVKPGPRVQPGQKRPQILLARPDPFRKKRGRKPLHADLRTR  
 TESPPPLPSRHHHLIRPQRVELRPGMKKPLQPASFYTYGLTRTSREESTSSSSFSHTSTKPGSMSGTWSNRTLNSSCG  
 SASFSRTSPSPQNKMSLSELKRSVLDSSSFKTLPLKSPGAASSLGLPGGFGGGQGVQRSPLSLRKAEGGGGASCLVQH  
 KQNSGLSKPSSPSAHRDRLNLQALSRLTLNLQASRSSLSIAGVVKADRIKDTRAPAGQGRTHPAGGVAKETLAGGARL  
 EDNRNPSRGNGNLSAGDSDESSSESEAAAAALYMGNSRRSLGDDTNESDAETDWRPARSLEHVFTVDVTANFLTVTVK  
 ESPTS VGGFSSGTH

MELPAAAGEHVFAVEGIEKKRIRKKGKVEYLVKWRGWSPKYNTWEPEENILDPRLLVAFQHRERQEQLMGYRKRGPKPKH  
LLLQVPSFARRSSIPAGLEEPSQDADNNAKADPVEVQRQPQQYQLNSKKHHQYQPSNQEVPADQQANGKKKFYIQLN  
SKKHHHHYEPDLNMYEAQGSRLKEESGSKPANPGWNLPLALQQKWVRKETGCLSKVKELAVEARKPAVKDAESERALK  
PNPKEASLPSSVSSKMKI IKNKKNKNGRIVIVMSKYMNNKVHGTHAKKHGETSSDHKQPQTTKPPENNPAPHTKIVEYPE  
NGIPKCMCSGRTPLRVAEHPMKCPKDRHSFKSPSTAEYENTEVARGQADLPDDLPLQLTASSPVTSWAPDNTNIPTQT  
ALEHIRIPSPFKDRKRKLSDPAEHRVSFKTYLSARLSAPSTAATPPQDTPMDLHCRGRHSSSTHEADSGGQEEPMD  
LSFPKTKKPAEPEVPPVAEPPVKAQPSDADTKTVKKAFAKKVSPFMGNIVITDITNSLTVTFKEYISF



MEIPAAGERVFAVESIEKRRRTAPQGRVEYLVKWRGWSSRYNTWEPEENILDPGCWTPSGRVREHQEQLKRGPKAKHLL  
IRVPSFARRSSVLAELEVSLEEGRCAAKPVDMQYQLTSSKHQQYSPVRRERDGRGRSTGKPGYYQLNSKQQRYPYQ  
GLEVQGPLRAEAQDAEAPQPPANGYRLPPVLQQKWVRDKDSGCLTKVKDITTELQKLPADLSGPKGGRKVGCAEGGPP  
RAEGLRSRKLKIVKNKNGRIVIVMSKFMEGGTHPANRRTGKLRSSPAAPRTTGRSPGLGGDGPEEKRRAPERDPAV  
TEPDKDVVKVKAQEQLPADPSPQPTGKANLTPHREAPPTRSQEEAKRDFRPQSDASPRPPAQQPPLQDPGDVDQEEPMD  
LRVVRVAVGAVGAAWPEAQAAQQPDRLRPLLGNIVITDITTNCLTVTFKEYVAA

>Tni\_Cbx6a (ENSTNIG00000018842)

MELSAAGDRIFAEEAILKRRVRKGQLEYLVKWKGWAMKHSTWEPEENILDDRILGFEEKERERELHGPKKRGPKPKN  
VAAKPFHAVGMAARVAVIHLPSSSSSSFAPSPKLNLSAATHKLKDDIHRCHMSRRPLPRSDPMAGSFNPGGLPSRL  
HVSFPSETVRILNRRVKPREVKRGRIILNLKVIDKPRGGSSVGSRNVAAGRQNI PSNRNIIGKKGEAPYRPFQPPPK  
MLGFPMYGKPFGLHSSSSSGGKSPPSASADPSQPSESPKSSPDPRETQPSPSAPPDPAPASLPSSPSSSVDEKDCAL  
DSSSSSQEGRKNSHQFRAKRPPAVGPGEQSAPPAESKRVPAGEPDWHPMAPSCTDVVVDVTTNLVTVTIKEF

>Tni\_Cbx7a (ENSTNIG00000006270)

MELSSIGDQVFAVESITKKRVRKGNVEYLLKWQGWPPKYSTWEPEDNILDQQLVLAEEENQERIRALAYRRKGLRPRK  
LVPANIFAMDLRSAHKVKPSPRLRLSLTRAMSTDVEQGRTRGRGHPKGRRGPATAPSVWPVRRGPCRRTGLPPTKKKR  
RPPREAPALCSSLQSPFLFPACACPAARRRHGRGPACGEGDKEMLGAAEESGPPSRGPAKYPGKVVTTKVTINALT  
VTFREAAMAEFFRGR

>Tni\_Cbx7b (ENSTNIG00000012945)

MELSAIGEQVFAVEAIVKKRVRKGNVEYLLKWQGWPPKYSTWEEHILDQRLVQAYEEKEQRDRAVGHRRRGSRAKR  
LLQVAGLSSQPPSPAQEDWEAGDQERPDSEDDDRPSFKSERAPTSTSEVTVDVTLNALTVTFRESTRAKDFFREWEL  
RV

>Tni\_Cbx8a (ENSTNIG00000017995)

MELSAVGESVFAAESIMKRRIRRGWEYLVKWKGWSQKYNTWEPEENILDERLFAAFEEERERERELFGPKKRGPKPET  
FLLKVRKAKAKERAYDFRGDAFRGIQVSYVPEPVLTPRAREGLRAVVPTIFPPSTVNRGESVVRVQPELCSRDLRVPP  
LPAGPDALHFPKRGPKPQCASRTAPRPGGVVPGQGGGGGAGEPQTRPVQGEELRLLRVSNHGLGQTAPGGSYRRLY  
DRGLHTHRRDTQTPRTQDGCSHAAPLKPASSTNPRRPTQLPLLDKPYLLDKPSPSPLDLDLDEVTWRPCLSSVEKVLV  
TDVTSNFLTVTIKESSTSQGFFRAKR

>Tni\_ENSTNIG00000004609

MELSAVGERVFAAESIIRKIRKGRLEYLVKWKGWSPKYSTWEPEENILDSRLFVAFEQRERERELYGPKKRGPKPKT  
FLKKAQAKEKVKSYDFRSESVRGMHISYPTPEPVATPRAREGLRAVVPTIFPPSTVNRGESVVRVQPELCSRDLRVPP  
LPAGPDALHFPKRGPKPQCASRTAPRPGGVVPGQGGGGGAGEPQTRPVQGEELRLLRVSNHGLGQTAPGGSYRRLY  
DRGLHTHRRDTQTPRTQDGCSHAAPLKPASSTNPRRPTQLPLLDKPYLLDKPSPSPLDLDLDEVTWRPCLSSVEKVLV  
TDVTSNFLTVTIKESSTSQGFFRAKR

>Mmo\_Cbx2 (ENSMOG00000020204)

MEELSAVGEQVFDAECILNKLRLKEKLEFLVKWRGWSLLIFHGVFNFCREQEKELLIRKGGKRPRGRPKILVITKS  
SSSSSGSSSSSCSDSSSSSCSSSSSSSDDDDDDEGQANQSVRTRDLHPVPQKKAQIVVAKQEPLKKRSRKPPSPDMNGP  
RKILKTLKDPDVRGAIKKPVHPASTFTMGFHRGPVRDPVGGQNRSPLTQGGAVKNLIGSVGSPSPNKSSQNRNVTEAK  
PSVSSMSGMSLDLKAASKSGVTAPNSNTSKSPIQNTQHTLSSPNGPKKLQAPVSTLQRMPTNKAVASFPSKNIS  
STQSGGLQPLNLQSKLAQNDAAGNGPSPAEEIQSPRVQGRLEKSSMQKSSMELQQERSACKDGKKTMDSTGEDESS  
SDSDQDYGQNRSVTVQNQDWKPTRNLIEHVFTVDVTANLVTVTVKESPTS VGFFSIRNY

>Mmo\_ENSMOG00000009201

MEGVTVGQVFDAECILSKRPRKGKFEYLVKWRGWSSKHNSWEPEENILDPRLLAHFHKEQELLVQKKGKRPRGRPK  
ILVTIPPHLSGGLPPTPTTSDPSLLFQPPEPAATEDGRSSSSSSSVLSSSPSCSSSEDEEHMKKAKAGPRVHPAPQKR  
PHVLLAKAEPPRKKRGRKPLHPDAKSRPPAPPPPPRHQLFRAPREDPRGGVKKPLQPASFTYTGLSRGSRDEASAS  
QTSSSSFQGSASKPSGLCWSARSTSPXXXXXXXXXXXXAAQSRPLSPRRQDGVGGATGSVQHRQQSSSLSSVVR  
DRANQALSLRALNLQSVSSHQGNARSSLRSGLPAGSGAEGRGGREVLGSTRHEERKHGPGNQGRVVNELSAGDSDET  
SSSDLLIEHVFTVDVTANFITVTVKESPTS VGFFNSRNH

>Mmo\_ENSMOG00000006960\*

MELPAAAGEHVFAVESIEKRRSRKGRVEYLVKWRGWSPKYNTWEPEENILDPRLLDADFQDRERQEQLMGYRKRGPKPKH  
LLVQVPSFARRSSILADLHEASLDEDSCEKTPPIQMLRPQGQQYQLNSKKHHQYQPLCRERILCNQRGTAAAPLNWR  
TL

>Mmo\_ENSMOG00000007637\*

MELPAAAGEHVFAVEGIEKKRIRKVTGRVEYLVKWRGWSPKYNTWEPEENILDPRLLVAFQHR

>Mmo\_Cbx6a (ENSMOG00000011204)

MELSAAGERIFAEEAILKRRVRKGQLEYLVKWKGWAMKHSTWEPEENILDDRILGFEEKERERELHGPKKRGPKPKN  
FVMKTRTQKGETSSRVSNAPSSSSSSSPFAPTKLSSLAATHKLKDDIHRCHMSRRPLPRFDPMANTFNPGSFPS  
RLHVSPSETVRILNRRVKPREVKRGRIILNLKVIDKAGRGTAAGSKNMPGRQNI PSNRNIIGKKGDVYRPFQPP  
LKMLGFPMYGKPFGLQCGGPLPFHSHPGTCSTTGSRDTHSSSSQYQTPPSPSSSSSEGKSPTNTSADQSQPTTGALL



>Lcr\_LOC104918881

>Lcr\_Cbx8 (Gene ID: 104921554)

>Lcr LOC113747116

```
>Pf1 Cbx2 (Gee ID: 114569523)
```

>Pfl LOC114548436

>Pfl Cbx4 (Gene ID: 114546081)

>Pfl LOC114569420a

```
>Pfl Cbx6 (Gene ID: 114569708)
```

MELPAAAGEHVFAVEGIEKKRKIRKGKIEYLVKWRGWSPKYNTWEPEENILDPRLLVAFQHRERQEQLMGYRKRGPKPKH  
LLQVPSFARRSSIIPAGFEETCQDAEGGLKSDPVQVQORSQPQQYQLNSKKHHQYQPSSEVPADQLTNGKKKFIYQLN  
SKKHHHYEPDPNMFDTOASRLKEVVKVOESACKPANPGWNPLPALOOKWVRDKDTGCLSKVKELAVEVRKPAVKEAES

EHALKPNPKDATLPSAISSMKI IKNNKNGRIVIVMSKYMDSNVHGAAGKHGESSSEDDKQNTKPSENNPAHRTKM  
AEHPENGIPKEICNGSSLPAAEHPIKCSPKDRHFSKPSSTAEYNTAEVARGQADLPDDLPLQLTASSPLMSWAVDTN  
IPTPTAVDQIRIPSPFNDKRRLSEPEVEDRSVSKTYLTSRSFSVPSTVVTTPQDKPMDLQCSGRASSACTYEVMDPG  
SQEFPMDLSCPCKTRQVEPEIQPEPAPEPEPAVRDTPITEDTQKSTESKEA **PVKKISPFMGNIITDITNLSLTVT  
FKEYVSE**

>Sdu\_Cbx6 (Gene ID: 111216565)

MELSAAGDR **IFAAEAILKRRVRKGRIEYLVKWKGWAMKHSTWEPEENILDDRLLILGFEQKER**ERELHGPCKRGPKPKN  
FVIKARSQKREPSRQATSTRQTTSRSSLSTSSRAAPSSSASPHHLPSSSSSSSTVAPSPKLNSLAATHKLKKDIHRCH  
RMSRRPLPRSDPMAPTFSNPGGFPSRMHVSPFSETVRILNRRVKPREVKRGRIILNLKVIDKPGRGGTAAAGSRNITG  
RQNIIPSRNRIIGKKGEAPYRPFQPPPLKMLGFPYMGKPFGLQCGGPVFPHPHTGSCSSSTGARDSNTTSPQYQSPSPAS  
SSGSEGSPTASAAQSKPATGASPSSEGPKPSKPHAETQKGQSAKNATPAPSSDANPVVSASFPLPSSPSSSLEDEEE  
EGAVDRSVPSEGGKRNLRQRAKRPPTTLPSVAPGDQSSAPTEPQRVPAEGD **PDWHPEMAPSCKDVVVDVTNLTGT  
VTIKEFPSP**ASCASPSSSPENASSPPASTSDDPSPAKP

>Sdu\_Cbx7 (Gene ID: 111219914)

MELSAIGE **QVFAVESIVKRRVRKGNVEYLLKWKGWPPKYSTWEPEEHILDQRLVQAYEEKEQ**RDRALGHRRKGSKSKR  
VLLQNTVYTMDLRS AHKTPEKPSRLRLSLTRSLDEDEDEDEDEDEPYSACRQGPSQVAHHKGKPSRSQFRCLDSNPAS  
PTQEDWEGLEDEEEEEEEEEEEEEEEEEEEEEEDNVEDEEDREEEETKTDEWSSAIVPDGVTASDKSD **DVWRPVISA  
GEVTVTDITNLSLTVTFRESRVA**KGFFRDWGLEV

>Sdu\_LOC111230359

MELSSIGDQ **QVFAVESITKRRVRKGNVEYLLKWKGWPPKYSTWEPEDNILDPRLLVLAEEENQE**KIRALAYRRKGLRPRR  
LVLRSIFAMDLRSAHKDAEKTTPRLRLSLTRSMSTDVDQGERGSMYHRSVRKRSRQVAKRRQDGPSNKP IRLPRKKE  
EPMEEDWSGISEEEKQESESTTEDRREDSLYGQSECSPFLERQDLEMEAEKVADLTAWTDGPGGGTSETTQSQT  
LACNQSKDSASVPVTGPGDAVTGDRSDWDTGEEGVESGSECPRLERINTTSVIVSVQASGETEGADAAAAAAAAAAAA  
AAAADACSTAEVRNEEVGGDNQSVTTTTPGS **QSDQTAEHPGKVIVTDVTINSLTVTFKEAMVA**EGFFKG

>Sdu\_Cbx8 (Gene ID: 111217943)

MELSAVGER **VFAAESITKRRIRKGRIEYLVKWKGWSPKYSTWEPEENILDSRLFAAFEQER**ERELYGPCKRGPKPKT  
FLLKAQAKVKAKEYFRSEAVRGMHVITYPTPEPVTPRAREGLRAVVPTIFPPSTVNRGESVRVRPELSTREHQSS  
LQONSPDGLLHVPPKRGPKPKPRFKDSSYSPAAPPHKRRAEQLSHGPHKLAKLQVEEMRLFKVAHRHPENHGHSH  
KHHHHHHHHHHHHHHHQQNRELSGGSSYKQLYSDRSLPHRIDIDTHRTKEGSSYLAPAHFKHQPKMSQSVSRPAELPL  
MEKPYFLDRPSPTRLDDDLDEV **SWRPSLGSVEKVLVTDVTNFLTITIKESSTS**KGFFKDKR

>Sdu\_LOC111227041

MELSAVGES **VFAAESITKRRIRGRWEYLVKWKGWSQKYSTWEPEENILDARLFAAFEERER**ERELFGPKRGPKPET  
FLLKAKAKAKEKTYEFRREAPRAIQVSYPIPEPVTPRAREGLRAVVPTIFPPSAVNRGESVHVRPPEERRPRPTPP  
AALTLESTGFPKRGKPKLQLHYDQDDGCSSAEPDTKRSRFLPEPVSHGLSKMTRRLHHHGETSDHSLQLLTKRFQ  
EETITPKSSCEQRHLVAGLSYTCFSPDKARKSDHMGHRTHFLSRVSVQPAGKLKHSAEHRSHQLKQYCLPREQPA  
VISTEAESIHDETARSA **SSWTPSFNTLDTVTVDVTMNFMTVTITRESSTD**KGFFSDKR

Sla\_LOC111655533\*

MSIYFRHNSWEPQENILDPRLLAAFNKKEQERELLRLKRGKRPRGRPRKILENVPEAPKSSSSSSSSSSSSSSSSSSSS  
SSSSSSSSDDDDSSVQATPSVRTRDLHPVPQKKAQIVVAKQEPKPKRSRKPLPPEVKEFQONKSPRKILKTSKDTD  
LPGAIAKKPVHPASFTFMGFHRGSARDTVGSQNRSSLAQGGAVKNSMSSVSGRSVQPASLSLNKSSQSRNVTEGKLSI  
SSMSSGTSLDLKAAGKSKGVAALNNTSKHPIQGTQHTLSSPNGQKKPQGPVSTLQRIPTNKAVASVPSKNASSNQ  
GSLQLPLNLQSKPMQSNDA PNGTTPVSGMRNATNPARKTTVTQNQEYNPKSPATPGRLQARKNQPGAIEKVKEANEIQ  
TSRVQGRLEKNSVHKSSSTEVQSQQERSAYKDGKKAKMNDMSTGEESSSSSDSDQDSSYTQDPSVAVQN **QDWKPTRSLI  
EHVFVTDVTANLVTVTVKESPTS**VGFFSIRNY

>Sla\_LOC111664318

MEGVTVGQ **VFDAECILSKRPRKGFYLVKWRGWSSKHNSWEPEENILDPRLLAAFHKREQ**ERELLFQKKG **KRPRGRF  
RKILPA**PTATKDSRSSSSSSSSGLSSSSSSSEDEHTKAKRVHPVPQKRPQILLAKPDPPR **KKKRGKPLHPDI**RA  
LRQAASRPPAPSPPPPPPPPPPPPPRRHHQALRLRLDEPRPGVKPLQPASFTYTGLSRSSRDEAASASQTSASSFS  
QTAASKPGSLSCIWTRNLSSSSSSSSSHNKASPSAQNKNSASELKRMSSES GSRGDGFKVSPLKQSGSSGSLGLHSSF  
GGGQAVARSQLSQRREQGVGGQIGLVQHKQNSGLNKPSLSSPTPRDRANQALSLRALNLQSVSKLPAGSSTSSAM  
VAASRSSLRSGGIVVKGGVGSIKETRMSAGQSRGLAAGGTAEPGRGKEMMAGGSSSRGSGRQEDRKHGLNSQNRSL  
NELSTGDSDETSSSEHDDTALYPSKSRPSLGNDATESDTE **TDWRPTRSLLEHVFTDVTANFITVTVKESPTS**VGFF  
FNSRNH

>Sla\_LOC111667573

MELPAAGEH **VFAVEGIEKKRIRKGRIEYLVKWRGWSPKYNTWEPEENILDPRLLVAFQHRER**QEQLMGYRKRGPKPKH  
LLLQVPSFARRSSIAGFEETCQDAEGGLKSDPVQVQRSQPQQYQLNSKKHHQYQPSQEV PADQLTNGKKKFIYQLN  
SKKHHHYEPDPNMFDTQATRLKEVVKVQESACKPANPGWNLPLALQKQWVRDKDTGCLSKVKELAVEVRKPAVKEAES  
EHALKPNPKDATLPSAISSMKI IKNNKNGRIVIVMSKYMDSNVHGAAGKHGESSSEDDKQNTKPSENNPAHRTKM  
AEHPENGIPKEICNGSSLPAAEHPIKCSPKDRHFSKPSSTAEYNTAEVARGQADLPDDLPLQLTASSPLMSWAVDTN

IPTPTAVDQIRIPSPFNDRKRKLSDPVEDRSVSKTYLTSRSFSVPSTVVTPPQDKPMDLQCSGRRASSACTYEVMDPG  
SQEPMDLSCPKTKRQVEPEIQPEPEPAPEPEPAVRDTPPITEDTQKSTESKEA **PVKKISPFMGNIITDITTNLSLT**  
**VTFKEYVSF**

>Sla\_LOC111655477

MELPAAGEH **VFAVESIEKKRSRKGRVEYLVKWRGWSPKYNTWEPEENILDPRLLDADFQDRER**QEQLMGYRKRGPKPKH  
LLVQVPSFARRSSILADLHEASLEEDGCQKSSAIQMLRPQGQQYQLNSKKHHQYQPLCREREAEQQTNKKFFYYQLNS  
KKHHHYQPD LKVHEPIFVKPRDIRAPELPNKGYNVPEMLQQKWVRDKDSGCLTKVKDITMELKKLPADLNGHKEPDKV  
KPKEDALPQSNVSSSKLKIVKNKNKNGRIVIVMSKYMENGMQAAIKNGDSETPKSPKGTDNSEAENDLEKMKLVKK  
LGLMNGFAKNPKEKPTIPSSGFNVVCPKEKEQSPKMEPTVTEQDKHVEVRGQGQLPADQPLQLTTKPNLLSLPLDRGV  
SSPLDKRGAQGGFQGLKRHLSDTDCDEHGSNKRFSSRSISVPNTVSSPSQSSISIDQNGHQSHTGLQLCGYADQEEPI  
DLSIVKTRPKAAASTATQPERHTQAETLTQTQDETHTQAETHTQMDTQTEAQPQTETQKSAEKVKVDSLVSNNKRRK  
EE **TFPSFQPFGLGNIVITDITTNCLTVTFKEYVTV**

>Sla\_LOC111673425

MELSAAGDR **IFAAEAILKRRVRKGRIEYLVKWKGWAMKHSTWEPEENILDDRILILGFQKER**ERELHGPKKRGPKPKH  
FVIKARSQKREPSRQATSTRQTASRSSLSSTSSRAAPSSASPHHLPSSSSSSSTVAPSPKLNLSLAATHKLKDDIHRCH  
RMSRRPLPRSDPMAPTFSPNPGGFPSRMHVSPFSETVRILNRRVKPREVKRGRIILNLKVIDKPRGGTAAGSRNITTG  
RQNIPSRNRIIGKKGEAPYRPFQPLKMLGFPYMGKPFGLQCGGPVFPHTGSCSSTGARDSNTTPSQYQSPSPSPAS  
SSGSEKGSPTAPAAKSKPATGASPSSEGPSPKPHAETQKGQSAKNPTPAQSSDANPVVSASPFLPSSPSSSLEDEEE  
EGAVDRSVPSEGGRNLRQRRAKRQPPTTLPCVAPGDQSSAPTEPQRVPAEGD **PDWHPMAPSCKDVVTVDTVTNLTG**  
**VTIKEFPSP**ASCPASPSSSPEN

>Sla\_LOC111646103

MELSAIGE **QVFAVESIVKRRVRKGNVEYLLKWKGWPPKYSTWEPEEHILDQRLVQAYEEKEQ**RDRLGHRRKGSKAKR  
LLLQNTVYTMDLRSAHKTPEKPSRHLHLSTRSLVPEDEDEDEDEDEDEDEDEDEDEDEDEDEDEDESYTACRQGRP  
QVAHHKVKPSRSQFRCLDSNPASPTQEDWEGLEDEEEEEEEEEEEEEEDNVEDEEDREEEETEVAQKDTTEKSGGIH  
NGQEKTEWRSIAIVPDGVTASEKSD **DVWRPVISAGEVTVDITLNSLTVTFRESRVA**KGFFRDWGLEV

>Sla\_LOC111647569

MELSSIGDQ **VFAVESITKKRRVRKGNVEYLLKQGWPPKYSTWEPEDNILDPRLVLAYEENQE**KIRALAYRRKGLRPRR  
LVLRSIFAMDLRSAHKDAEKTTPRLRLSLTRSMSTDVDQGERGSMYHRSVRKRSRQVAKRRQDGPSNKPIRPLRKKE  
EPMEEDWSGISEEEKQSESTTDRREDSLYGQSECSSPFLERQDLEMEAEKVDADLTAWTDGPGGGTSETTQSQT  
LACNQSKDSASVPVTGPGDAVTGDRSDWDTEEGVESGSECPRLERINTTSVIVSVQGSGETEGADTAAAAAAAAA  
AAAAAAAAAAAAADACSTAEVRNEEVGGDNQSVTTTTTPGS **QSDQTAEHPGKVIIVTDVTINSLTVTFKEMVAE**EGFFKG  
Y

>Sla\_Cbx8 (Gene ID: 111655455)

MELSAVGER **VFAAESI IKRRIRKGRIEYLVKWKGWSPKYSTWEPEENILDSRLFAAFEQERER**ERELYGPKKRGPKPKT  
FLLKAQAKVKAKSYEFSEAVRGMHVITYPTPEPVVTPRAREGLRAVVPTIFPPSTVNRGESVVRVRPELSTREHQQPS  
LQHNSPDGLLHVPPKRGPKPKPRFKDSSYSPAAPPEPHKRAAEQLSHGPHKLAKLQGVVEMLRFKVAHRHPENHGHSH  
KHHHHHHHHHHHHHHQONRELSGGSSYQLYSDRSLPHRIDIDTHRTKEGSSYLAPAHFKHQPKMSQSVNRPAELPL  
MEKPYFLDRPSPTRLDDDLDEV **SWRPSLGSVEKVLVDVTNFLTVTIKESSTS**KGFFKDKR

>Sla\_LOC111667559

MELSAVGES **VFAAESI IKRRIRGRWEYLVKWKGWSQKYSTWEPEENILDARLFAAFEERER**ERELFGPKKRGPKPET  
FLLKAKAKAKEKTYEFREAPRAIQVSYPIPEPVITPRAREGLRAVVPTIFPPSAVNREGSVHVRPPEERRRPRPTPP  
AALTQLQEPTEFPKRRGRPKLQLHYDQDDGCSSAEPDTKRSRFLPEPVSHGLSKMTRRLHHHGETSDHSLQLLTKRFQ  
EETITITPKSSGEQRHLVAGLSYTCAFSPDKARKSDHMGHRTHFLSRVSVPPQPKLKHSAEHRSHQLKQYCLPREQPA  
VISTEAESIHDETARSA **SSWTPSFNTLDTVTVDVTMNFVTITRESSTD**KGFFTDKR

>Lbe\_LOC114919638

MEGTVVGQ **VFDAECILSKRPRKGFYLVKWRGWSKHNWEPEENILDPRLLAFAHKREQ**ERELLFQKKG **KRPRGRF**  
**RKIQPF**APAATKDSRSSSSSSSSGLTSSASSSSSEEDDEEDHTKKVKAAPRVHPVPQKRPQILLAKPDPPRKRGRKPLP  
PDLRALRQAASRSPPPPPPPPPPPPRHHQVLRPSREETRPVKKPLQPASFTYTGLSRSSREEAAAAASQTSSSSFS  
QTAASKSGSLSGMWTSRMSPPSSSYKTSSSSSHSKNSLSELKRSHSDTSGGRDGFKASSLKQGGGGAMMHGGFGQTAPR  
SSLSQRRQEGGGQTASLQHKQNSQSKMASSLTTPDRASQALNLRALNLQSVGKTAAGSNAAVASRTSLRSGGVMV  
KAGLKDTRAAASVQRSSVPAGGAAEQGRAREERGRETSAEGKLAGSSGGRHEERKHNVTQTRSLNELSTGDSDETSSS  
ESEHGADLFPNNRSPSFGDDATESDTE **TDWRPAHSLLQVFVTDVTANFITVTVKESPD**QCRIL

>Lbe\_LOC109999250

MELPAAGEH **VFAVESIEKKRSRKGRVEYLVKWRGWSPKYNTWEPEENILDPRLLDADFQDRER**QEQLMGYRKRGPKPKH  
LLVQVPSFARRSSILADLHGATLDDDSCKKTSPIQMLRPQSQQYQLNSKKHHQYQPLCREREAEQQQATGKKFFYYQL  
NSKKHHHYQPD LKVHEPMPFAKPEVKAPELANKGYNLPPVLQQKWVRDKDSGCLTKVKDITMELKKLPADLNGEPERV  
KPKEDAVTQSNGVSSSKLKIVKNKNKNGRIVIVMSKYMENGMKATKIKNGDSGSAEKHLQRTDSSAEHLEKMRVLVK  
LGLMNGFAKKLKD KSTVLTSGFSRDHPREKEQSPKTEPTVTERDKHVEVRGQGQLPKDQPLQLTTKSNLLPLPLDRGV  
PHSADIQGSQGGFQGLKRHFSDSSEEHGSSKRFFSTRSISTPHVSSPAQSVSVAQNGHQSPIGLPVCEYTDQEEP



DLSIVKSRHCPTRAETHKQTETVTHTETSTQEETDTQAMTHVAQTETEHQTETENATGEEKVNLSVTHHEKKTDD **SP**  
**PSFKPFLGNIVITDITNCLTVTFKEYIAV**

>Lbe\_LOC109985836

MELPAAGEHVFAVEGIEKKRIRKGI EYLVKWRGWS PKYNTWEPEENILDPRLLVAFQHRERQEQLMGYRKRGPKPKH  
LLLQVPSFARRSSI PAGFEESSQDPEGVLKSDPVQVQRPQPHYQLNSKKHHQYQPSSQEV PADQLHNGKKKFIYQLN  
SKKHHHYEPDLNMYDAQASRLKEVVKVQEPASKPANPGWNLPLALQQKWVRDKDTGCLSKVKELEVRKPAVKDAESEH  
ALKPNPKDATLPNAVSSKMKI IKNNKNGRIVIVMSKYMDSNKVHGAKGKHGESSSVEKPQNTKPSENNPAHTTKMVA  
YPENIIPKEICNGSSPPAAEHPIKCSPKDRHFSKPSPTAEYNTVEVARGQADLPEDLPLQLTASPPPTSWVVD TNIP  
TPTDNDQIRIPSF PNDKRKISDTTDDRSVCKSYLTSRSFSVPSTVVAPPQDSPMDLHCSGPRHSGTRTYEALDSGSQ  
EEMPDLSCPKTKKQAEFERQPEPEPVVENTTPVSEETHEPTEKSKEA **PVKKPSPFMGNIITDITNLSLTVTFKEYVS**  
**F**

>Lbe\_Cbx6 (Gene ID: 109991257)

MELSAVGDRVFAAAEAILKRRVRKARLEYLVKWKGWAMKHSTWEPEENILDDRILILGFEQKERDRELHGPKKRGP KPKT  
LAMKARGRKGGNSSRISNSRQTTS CSSVSTSSRATPSPSTSAAPHRLGSSSSSSSTVAPSPKLSSLAATHKLKDIHR  
CHRMSRRPLPRSDPMASSFSNPGGFPSRPHISPFSETVRILNRRVKPREVKRGRIILNLKVIDKPGRGGTATSGRNN  
VGRQNI PSRNRIIGKKGEAPYRPFQPPMKMLGFP MYGKPFGLQCGLQFPFSPHSGSCSSTGARDSHSSSSKYQSPSP  
SNSSCSE GKSTTNAAAKSQGSAGAXPSTGGPKSSTPQTETQKGT KPPAPPQSSDEDPTASGSPFLPSSPSSSLEDEE  
EEGAPDHSEGGRRKPSQQRAKHQLPASSSSDTPGDKSSTPTEPKRVPAEGD **PDWHPEMAPSCKDVVVDVTNLTVT**  
**IKEFPSP**ASCPASPSTSP EEA SPPPSNTSDNPSPPKP

>Lbe\_Cbx7 (Gene ID: 109992249)

MELSAIGEQVFAVESVLKKRVRKGNVEYLLKWKGWPPKYSTWEPEEHILDQRLVQAYEEKEQRDRALGHRRKGS KTKR  
LLLQSTVYTMDLRSAHKTQEAPPPRLRLSLTRSLVPEDEDP SFGVYRKVPQPLEHLKSKHGRPQLKCLDSDPAKQED  
WAEEGEEEEEEEEEEVDNVEDEDDMEVEVEEEGEKEEATGKS KSI LDGRKRTDSWSSAIEPDELTA SEKPD RD **DIW**  
**RPIIGAGEVTVTDVTLNLSLTVTFRESRVA**KGFFRD LGLEV

>Lbe\_LOC110004121

MELSSIGDQVFAVESITKKRVRKGNVEYLLKWKQGWSPKYSTWEPEDNILDPRVLVAYEENQE KIRALAYRRKGLRPRR  
LVLRNIFAMDLRSTHKEAEKPPRLRLSLTRSMSTDVDQGERGGVYHRYTWGKTKHRASRRTIRPPEKKKEDEDEWSS  
EEEEERDCVTDDRREGSLYAPSVCS SPMLE RQDVELEVMEEEAEHLGGGAKEAWTDREEMSKMQTFECQPEVSV CVP  
EEGPEDAVTGDDDTFWGGV EEEVEAE CPTLDRNDNTTSITTSMTAEEREEDVTRATPGI **EAPPTAAEHAGKVIVTKVT**  
**IDSLTVTFKEATVA**EGFFKKY

>Lbe\_Cbx8 (Gene ID: 109999244)

MELSAVGERVFAAAESI KRRIRKGRIEYLVKWKGWSPKYSTWEPEENILDSRLFVAFEQREERELYGPKKRGPKPKT  
FLLKAQAKVKAKSYEF RSDAVRGMHITYPTPELIVTPRAREGLRAVVPTIFPPSTVNRGESVVRHRPPELSIREYQQPF  
LQQTSSDGLIHAPKKRGPKPKPRFKDVSCRPLAPEPHRGRAESQLGQYKVPKYQGVEEMRVVRVAHRHPESHKHHHP  
HHHHHTHNIGASGGGSHKQFYADRG LPHRVD MNTHGT KDSSSYLAPAHFKHRSKMSQNP SRPLELPQMEKPYFLDRP  
SPTRLDAQVDE **VTWKPSLGNVEKVLVTDVTTNFLT VTIKESST**SGFFKDKR

>Lbe\_LOC109985837

MELSAVGESVFAAAESI KRRIRGRWEYLVKWKGWSSQKYSTWEPEENILDARLFAAFDERERERELFGPKKRGP KPKT  
FLLKAKAKAKEKAYEFRGEASRGIQVAYPIPEPVITPRAREGLRAVVPTIFPPSAVNRGESVYVRLPEPETRKPAPA  
ASLLVQEPGRAPKKRGRKPKPHLEYDEDDDEEDGSGEPDVKLSRPLEEPGSRGFSKLSRRLHHPHHHHHHHQGETSDH  
SLMQLTKRFQEKTTITPKSSSEQRHAGLSYSCAYRPDVRTSQQRVHRTSCFVPPPKPNHSSSEQQRRHHQVRELCPPR  
EQPDVSSSHDPSTRPA **SSWTPSFSSSLDSVTVDVTMNF LTVTVRESST**KGFFRGKR

>Cgo\_LOC115005214

MEGVTVGQVFDAECILSKRPRKGKFEYLVKWRGWSSKHNSWEPEENILDPRLLA AFHKREQEKELLFQTKG **KRPRGRF**  
**RKILPA**PAATKDSRSSSSSSSVLSSASSSSSEDEH TTKARSGPRVQVPVQKRPQIVLAKPELPC **KKKRGKPLHPD**  
**VRALRQAKSRPPPPPPSPPPPPPLPPPPPPRHHQVLRPPREDPRPGVKKPLQPASFTYTGLSRSSRDEAAAAAASQ**  
PSASSFSASKASSLS CMWTSRSMSPSSSYRTSPAPQSKNSLSELKRSISDTGGGRGDGYKASALKHGGGSLGLHSSF  
GGGQAAVQSRPSLQRQDGS LQHKQQLNKAAPAPTPRDRANQALNLRALNLQSVSKPVSVSGLGNI AAASRTSLRS  
GAGGIVVKG GGIKETRTSAGGQRSGGSEQARLREEMLAETKKMTGSSSARGSGGERKHGLASQNRSLNELSTGDSDE  
SSSSSESERDAAPYNNRPSLGD DVATESDTE **TDWRPARSLLEHVFTDVTANFITVTVKESPTS**VGFFNSLNH

>Cgo\_LOC115012765

MEELSAVGEQVFDAECILNKRLKKGKLEFLVKWRGWSSKHNSWEPEENILDPRLLA AFNKKEQEKELLLLKKGKRPGR  
RPRKILENVPEATKSSSSSSSGSSTSSSSDSSSSSSSSSEDDDDSHVQANPSVTRDLHPVPQKKAQIVVAKQEP  
PKKRSRKPPSPEVKELQQGKPRKTPKTPKDADVGAIKKPVHPASFTFMGFHRGSPRDLSGQNRSSVTPGAVVKHSIS  
SAGSGRSVPASLSLNKSSSRNVTEGKLSISSMTSGTSLDLKAAASKSGVAALNNTSKHLIQGTTQHTLSSPNGQ  
RKAQAPVSTLQRI PNTKAVAALPSKNASSNQSGGPQLNLNRNKPVQSKDAPGNCTAPASGLRSPTNPARKTSVSNQE  
YNPPKSPATPGRLQARKSQAGA EKVK EATDIQTPRVQSRLGKSSVQKSSTEVQIQQERSASKDGKKAEMSTGEEESGS  
DSDQDSSSYVGQDGSVAVQN **QDWKPTRSLIEHVFTDVTANLVT VTVKESPTS**VGFFSMRNY

>Cgo\_Cbx4 (Gene ID: 115013642)

MELPAAAGEHVF~~AVESIEKKRSRKGRFEYLVKWRGWSPKYNTWEPEENILDPRLLD~~AFQDRERQEQLMGYRKRGPKPKH  
LLVQVPSFARRSSILADLHGASLDESDCQKPSPIQMLRPQGGQYQLNSKKHHFYQPLCREREAEQQTNGKKFFYYQLNS  
KKHHHYQPD~~LKGHEPMFAKPREVKAP~~ELVNKGYNLPPVLQQKCVRDKDSGCLTKVKDIAMELKKLPADLNGHKEPEKV  
KPKEDALPQSNVSNGLKLVKNKNKNGRIVIVMSKYMENGMQAAKIKNGDSETAGKPPQGTDSSENHLEKMKLVK  
LGLMNGFAKKT~~TKDKPTVTSSGFNGLCPKEKEQSLKTEPTVTEQDKHVEVRGQGQLSADQFLQLTTKPNLLSLPLDRGV~~  
PSP~~LDKRGSHGGLQALKRHLSDSEEHGSSKRFLSSRSISAPNAATPPTQ~~SISIDQNGHSHIVLQDCGYADQEEPIDL  
SVVKS~~SRPKATQPETHTQAETVTQAETHTQGETDTQTQTDVQTETQPQTETHKSTEEKDNSSSVCKHETRKEE~~TFPSE  
QPFLGNIVITDITTNCLT~~VTTFKEYITV~~

>Cgo\_LOC115012777

MELPAAAGEHVF~~AVEGIEKKRIRK~~G~~KIEYLVKWRGWSPKYNTWEPEENILDPRLLVAFQ~~HRERQEQLMGYRKRGPKPKH  
LLLQVPSFARRSCIPAGFESSQDAEVS~~IKSDPIPVQRPO~~QYQLNSKKHHQYQPSQEV~~PADQPTNGKKKFIYQLN~~  
SKKHHHYEPDPNMYDAQASRLKEVVKVQEPASKPANPGWNLPALQ~~QKWIRDKDTGCLSKVKELAVEMRKP~~PAVKDAES  
EHALKPNPKDATLPSA~~ISSMKMIKKNKNGRIVIVMSK~~YMDGNKVHGAKGKHGESSEV~~KPQNTKPSENNPAHTTKI~~  
VEHPENGIPKELCNGRSLPAAEHPIKCS~~PKDRHFSKPS~~STAEYNT~~EVARGQADLPDDLPLQLTASSPMT~~SWAVDTN  
IPTPTSVEQIRIPSF~~PNDKRKRLSDPAEDRSVSKTYLASRSF~~SV~~STVVT~~PPQDKPMDLHCNGPRHSS~~STFEVVD~~SG  
SQEEFMDLSCP~~TKQKQVEPIQPEPEPAVTNTPPVMEDTQ~~QSTEKSKEA~~PVKNTISPFMGNIITDITN~~SLT~~VTTFKE~~  
YVSE

>Cgo\_cbx6 (Gene ID: 115005610\*)

MSQSDCSSLTQDAAASVLALSAPLRVAKLLSSARYH~~GDRGEGRSEGVGMRESKQAPVAPS~~PKLNSLAATHKLKKDIHR  
CHMSRRPLPRSDPMASSFSNPGGFPSRLHVS~~PFSETVRILNRRVKPREV~~KRGRIILNLKVIDKAGRGAAAGTRNIT  
AGRQNI~~PSRNRIIGKKGEAPYRPFQ~~PLKMLG~~PFMYGKPFGLQCGGPLSFHSHPGSS~~TGAHSTSSQYHSTPSSSTGSE  
GKSCTKASAWSQ~~PATGASASSVAHKS~~KAPAE~~TQKSQSAKPAASAPSSDANPEAS~~PVL~~PSSPSSSSSAILEDEEDGA~~  
LESCATPEGGKRRAKRQ~~PPTAAADQSSAPAE~~PQRALAE~~GD~~P~~NWHP~~EMAP~~SCDKDVVTDVTTNLVTVTI~~KEFPSPASC  
PASPSATPDNASPPPPSTTSDDPSPAKP

>Cgo\_LOC115012745

MEQSSIGDQVF~~AVESITKKRVRKGNVEYLLKWKQGWSPKYSTWEPEDNILD~~PRLVLAYEEHQEKIRALAYRRKGLRPRR  
LVLRNIFAMDLRSANKASEKPPPR~~LRLSLTRSMSTDVDQGERGSLYRRLARRKSKQ~~RVSKRGSEGPSNNSILPLRKIE  
EPIEEDWGATSEEN~~TEERHEDSLYCSPPLLERQDLEMEVEEKLDIDLA~~AVSTERWTDGADGWTSDTRQSQMFACD  
QSKDSASVSEALPEDAVSVGDRSDWDKSEEGVECPRLQSRNCQSNNTTSTIASLQSSSGTAGDYFTTEEATNEEASGN  
NQSKTGTSPG~~SQADPAEEHPMKVISTDVTINSLT~~VTTFKEATVAEGFFKGY

>Cgo\_LOC115024515

MELSAIGE~~QVF~~AVEAIVK~~KRVKGNVEYLLKWKGWPPKYSTWEP~~EEHILDQRLVKAYEEKEQE~~E~~EKTLGHKRKGSKAKT  
LVLQDTVYTMDLRS~~AHKTPEQPPPR~~LRLSLTRSL~~LPEDEDQPYGACRRDPQLEHREVQPR~~RSKFTCLDSNPPSPTQED  
WEGWGEEDVGSEEDTEEEALKETAERSGGTLDGQRR~~TVERRSIAPHEITAAGKPD~~DVWRPIVVPGEVTVTDVTLNSL  
TVTFRESRVAKGFFRDALKV

>Cgo\_Cbx8 (Gene ID: 115013830)

MELSAVGERVF~~AAESI~~IKRRIRKGR~~IEYLVKWKGWSPKYSTWEP~~EENILDFRLFAAFEERERERELYGPKKRGPKPKT  
FLLKAQAKIKAKSYE~~FRGDAVRGMHITYPTPEPV~~TPRAREGLRAVPTIFPPSAVNRGESVVRVQPELSAREYQQPS  
LQQTGPDGLIHIPKKRGPKPKPRFMDGNCSTTVFEPLKRAEQQGS~~HGPHTLAKLQGGEEMRLINHRHPEIHGHKRHH~~  
HHHHHHH~~THDRGSSGGSSFNQLYLERSLHPHRTDMDSHRTK~~DS~~SSYLAPVHFRHQSRMSQSL~~SSEL~~PQMEKPYFLDRP~~  
SPTRLDVDLDE~~VTWRPSVGNVEKVLVDVTTNFLT~~VTIKESSTSGKFFKDKR

>Cgo\_LOC115012434

MELSAVGESVF~~AAESI~~IKRRIRGRWEYLVKWKGW~~SQKYSTWEP~~EENILDARLFAAFEESERERELFGPKKRGPKPET  
FLLKAKAKEKTYE~~FRREAPRGFQVSYPTPEPVII~~PRAREGLRAVPTIFPPSAVNRGESVYIRPPEPERRPRSTPPAA  
LTDQEAVRFPKKRGRKPKLRLHYDEKADGGISAEPD~~TKRSRSLEEPVSHGLSNMSRRLHHGVAPDHS~~LMQLTRRFQE  
KSTITPKHSSSSSSSEQRHAGLCCSAFNP~~DVGQLGHRTKSLVSVPRPSSSE~~EHRRHQVKECCEPDVISTQSESIHEQ  
AARPA~~ESWSPSFTNLDVTVTVDVTMNL~~LT~~VTVRESSD~~KGFFREKRRVRASDV

>Ena\_cbx2 (Gene ID: 115047492)

MEELSAVGEQVF~~DAECILNKRLRKGLFLVKWRGWS~~SKHNSWEPEENILDPRLLA~~AFNKKEQ~~ERELLRKRGKRPRC  
RPRKVLNVPEAPKSSSSSSGSSSSSSSDSSSSSSSSSEDDDDDEDSNVKQVNP~~SVRTRDLHPVPQKAQV~~VVAKQ  
EPSKKRIRKPLPPDVKEFQQNKSPRKILKISKDADLP~~GAIKKPVHPASFTFMGFHRGSGRDTAGGQSR~~SPLPQGGAVK  
TSMSSVSGSRPVQPASLPLNKSSQGRNVAEGKLSISSMSSGTS~~LDLKAAGKSKGVAALNLNTSKHPIQ~~GTQHPVSPP  
NGQKKPQGSVLT~~LQRI~~PN~~TKAVASVPSKTASSNGSG~~LQPLNLQSKPAQSD~~DAAAPGSGVRNATNLARKTN~~VAAQ~~Q~~NEE  
YNPPKSPATPGRLQARKNP~~GAEKVKEANEIQTSRIQGRLEKNSMHKS~~STE~~VQSQQERSTYKDGKKAKMND~~MTSGEEE  
SSSDSDQDSSYTQERSVAVQN~~QDWKPTRSLIEHVFVDVTANLVTVTVKESPTS~~VGFFSIRNY

>Ena\_LOC115059891

MEGVTVGQVF~~DAECILSKRPRKGF~~EYLVKWRGWS~~SKHNSWEPEENILDPRLLA~~AFHKREQERELLFQKKGKRPRGR  
RKILPFVPTTTKDSRSSSSSSSGLSSASSSSDDEHSSKVKRVHP~~IPQKRPQIMLAKPNRPRKKRGRKPLHPDLRA~~

>Ena LOC115047550

```
>Ena LOC115044326
```

```
>Ena cbx6 (Gene ID: 115044595)
```

```
>Ena cbx7 (Gene ID: 115060227)
```

```
>Ena LOC115047474
```

```
>Ena LOC115045432
```

```
>Ena LOC115047560
```

```
>Pra Cbx2 (Gene ID: 11444058)
```

MEELSAVGEQVFDAECILNKRMRKGKLEFLVKWRGWSSKHNSWEPQDNIIDPRLLAFAFNKEQEKELLRLRKGKRPRG  
RPRKILENLPEAAKSRSSSSASSSSSSSDSSSCSSSSSSSDDDDDSDQDQQANPSVTRFLHPVPQKKAQIVVAKQE  
PPKKRSRKPLPLEVKEFPFQNLKGPKRKILKTTKIDILPGAIGKPVHPANFTFMGFHRGSGARDAAGGNRSRLTPGGALVN  
SVGAVSGSRSSVQPPSFQNLKSSQSRNVTGKLSINMNSGTLSDLKAAAGSKGVAALNLNLSKHPITQGTQHTLSS  
PNGOKKLQTPVSTVORIINTKTYSLLSKNAPSNOSSGLOPLNLQNLKEVQSNDDPPNGNTPFASGORNPATPARKTTVPO

NQECNTPATPVKLGQRKTQTGADKVVREVNKIQTSTVQGRLEKSSMHKSPTEVQSQQERSASKDGKKAKMTDMSTGEEE  
SSSDSDQDSYAGQDRSVAIQN **QDWKPTRSLIEHVFTDVTANLVTVTVKESPTS**VGFFFSIRNY

>Pra\_LOC114452074

MEGVTVGQ **VFDAECILSKRPRKGFYLVKWRGWSSKHNSWEPEENILDPRLLAFAHKRE**QERELLFQKKGKRPRGRPR  
RKILPPAPAAATKDIRSSSSSSSSGLSSASSSSSEDEHTKKAKPSPRVHPVPQKRPQIMLAKPDPKRKKRGRKPLPP  
DLKALRQAKSRSPPLPPRQHQAALRPDELRLPGVKKPLQPASFTYTGLSRTSRDEAASSSSQTSSSSFAQSASSKPG  
TLSSIWTSRSLSTSSPSSGSSHNKANPSAQSKNSVSELKRSISETGSSRGDFKVSPLKQGGASGTLGLHSSFGSGQLA  
VQRSTLSQRRQESIGGQGGVLQHKQQNSSLSKPSSSSSSPTPRDRVNQALSLRALNLQSVSRPPTSSSLQGNNTSSAAA  
RLSLRSGSNMVIKGSTKETRISAGGQRSSLAAGSAVEQGRGKEKQEDRKHTLSSQNRNLNELSTGDSDETSSSESEPD  
LSLYPSNSRPSLGINATDSDE **TDWRPARSLLEHVFTDVTANFITVTVKESPTS**VGFFNSRNH

>Pra\_Cbx4 (Gene ID: 114436730)

MELPAAAGEH **VFAVESIEKKRSRKGRVEYLVKWRGWS**SPRYNTWEPEENILDPRLLDADFQDRERQEQLMGYRKRGPKPKH  
LLVQVPSFARRSSILADLQEEESLDDVGCQKAQQYQLNSRKHQYQPLCREAEPAQANGKTFYYQLNSKKHHHYQPD  
VHEPIFSKPREVKAPELANKGYNLPPVLQKQWVRDKDSGCLTKVKDITMELKKLPADLNHGKAPEKVKPKEDTSPQSN  
GVTSSKLKIVKNKNKNGRIVIVMSKYMENGMQTAKIKNGSSERAEEASPOGAESAENHLEKMKLVKKLGLMNGFSKSL  
KDKATVPTSGFNRCDSKEKEQSPRAEPTVTEQDKHVGVRGQQQLPADQPLQLTTKPNLLPLDSSQDKGSGGLKRHL  
SDTDAVEHGGGKRFSLCRSISAPDAASSPATNVQQSRSALQDCVYADQEEPIDLMSVKSRPTASLTHTQPETVTHT  
QDETQTHNPEPAEEDAAEPVCNQETRK **EETSPSFQPF LGNIVITDITTNCLTVTFKEYVTA**

>Pra\_LOC114439615

MELPAAAGEH **VFAVEEIEKKRIRKGT EYLVKWRGWSSKYNTWEPEENILDPRLLVAFQHRER**QEQLMGYRKRGPKPKH  
LLLQVPSFARRSSIPAGFEEISPDAGSHKSDPLQVQRSQPQQYQLNSKKHHQYQPSSQGVPADQIANGKKKFIYQLN  
SKKHHHYEPDPNMYDAQASRLKEVVKVQEPASKPANPGWNLPLALQKQWVRDKDTGCLSKVKELAVEVRKPAVKEAES  
EHALKPNPKDATLPSSISSKMKIIKNKNKNGRIVIVMSKYMDSNVHGAAGKHGESSREEKSQKPSENNPAHRTKMAE  
HPENGIPKEICNGSSLSAAEHPIKCPKDRQFSKPSPTAAEYNTVARGQADLPDDLPLQLTASSPVASWAVDTNTP  
TPTAVDQIRIPSPFGDRKRKLSDPVEDRSVSKVYLTSRSFSVPSTVVTTPQDKPMDLHCSSSRSSSTCTYEDMGSDQE  
PMDLSCPKNKTQIQETETPEPEPEVQDTPPVTEDTQKSDTSKEA **VKKVSPFMGNIIITDITTNSLTVTFKEYVSF**

>Pra\_Cbx6 (Gene ID: 114439322)

MEPSAAGDR **IFAAEAILKRRVRKGRLEYLVKWKGWAMKHCTWEPEENILDDRILILGFEKKER**EREMHGPKKRGPKPKN  
FVTKTRGPKGESSSRASNSRQSASARSSSSTSTRAAPSSSPSPNLPSPPSSSSSAVAPSPKLNLSLAATHKLKDIHRCH  
RMSRRPLPRMDPMGPAFSNPSGFPSPRMHVSPFSETVRILNRRVKPREVKRGRIILNLKVIDKPGRGGAAGGSRSITS  
GRQNIPISRNRIIGKKGEAPYRPFQPPKMLGFPYKGFPLQCGGAVSFHSHPGSCSSSTGARDRTTTPKYQSPSPSPS  
SSSGSEGKSPTNATAVTGATPSNKNPKSSKPHTEQOQGSTKPSAPALSSDANLAASASFLPSSPSSSLDDEEEEGA  
PVPAGEGKSLRQRRAKQLPSDSTEDQSTPAEPQVRVPAEGD **PDWHPMAPSCKD VVVTDVTTNLVTVTIKEFPSEA**  
SCPASPSACPENTSSPPPSTATDDPAPEKP

>Pra\_LOC114437794

MELSAIGEQ **VFAVESILKRRVRKGNVEYLLKWKGWPPKYSTWEPEEHILDQRLVQAYEEKEQ**RDRAGYRRKGSKAKR  
LILENTVYTMDLRSAAHKAPEKPPRLRLSLTRMSSTDVDQVYRRLRKRIRQKVTKRVPPEGVNPKIHLQKKKEEEEEEA  
GEEEEEEEEEDGEEEEEVTAKKTEGRNLNGQESTDGWSATVGPDEVAASEKPS **DVWRPVIVPGEVTVTDVTLNSLTVT**  
**FRESRVA**KGFFRDWGLAV

>Pra\_LOC114439674

MELSSIGDQ **VFAVESITKRRVRKGNVEYLLKWKGWPPPEYSTWEPEENILDPRLVLDYEENQE**KTRALAYRRKGLRPRR  
LVLRNIFAMDLRSAHKVTEKPPRLRLSLTRMSSTDVDQVYRRLRKRIRQKVTKRVPPEGVNPKIHLQKKKEEEEEEA  
LVEDWGGISEEDKPVSDGIIIEERCEGSLYGRSECSPPLLERQDLDMEEVEEKVETAVSTEMWTDGEDGEKTCETTQTF  
DQSKDSNPAPAPGDVVAVGDRSDIDRRDDEAGSEVPRAERSNATSVIVSVLAASQERKEEDEDNQSVTTTTTTTTT  
T **LGSQTAEHGPKGVFTDVTVNSLTVTFKEAVMA**EGFFNGY

>Pra\_Cbx8 (Gene ID: 114436737)

MELSAVGER **VFAAESIIKRRIRKGRIEYLVKWKGWSPKYSTWEPEENILDSRLFAAFEQRER**ERELYGPKKRGPKPKT  
FLLKAQAKVAKSYEFRESVVRGMHITYTPEPVTPRAREGLRAVVPTIFPPSTVNRGESVVRVPELSTREHQQSP  
LQHTGPDGLIHIPKRGPKPKPRFKDGSFGPAASEPHKRRPEEHLSSHSHKLAKLDHRHLLHHHHHHHHHHHAHSRGV  
SAGSSYKQLYSDRSLHRTDMDTHKTEHASAYLAPPHFKHHHKTSPGLSRPAELPQMEKPYFLDRPSPTRLDDDLDE **V**  
**TWRPSLGNAEKVLVTDVTSNFLTVTIKESSTS**KGFFKDKR

>Pra\_LOC114439616

MCGIKQPEEDEGSQKIIK **ETEINEVHGESSRLLGRWEYLVKWKGWSQKYSTWEPEENILDARLFAAFEERERER**EREK  
FGPKKRGPKPETFLKAKAKEKTYEFREASRGIQVSYVPEHVITPRAREGLRAVVPTIFPPSTVNRGESVHIRPPE  
PERRPRPTPSALNAPESLRFPPKRGKPKLLRLYDKEDGSSSAEPPDKRSRLHEEPVSHCLSKMSRRLHHYHHHHH  
HHHHHHHGETSEHSLQLTKRFQEETTITPRSSSEQRPTGGAGLSYTCAFSSNRSDPGGHRTKCLKVSSIPQLKHSAG  
QQGREVKESAAMSSQS **SSWTPCLTMDSVTVTDVTINFLTVTIKESSTD**KGFFRDKR

>Lca\_LOC108874733



```
>Spa Cbx8 (Gene ID: 103372326)
```



MELSAVGESVFAAESIIKRRIRKGRIEYLVKWKGWSPKYSTWEPEENILDSRLFAAFEQREERELYGPKKRGPCKPT  
FLLKAQAKVKAASYEFSEAVRGMHITYPTPEPVVTPRAREGLRAVVPTIFPPSTVNRGESVRIRQPELSSREHQPS  
LQQTSDGLIHMPKKRGPKPKPRFKDGLGPAISEPHKRRVEEQMGHGPHKLSKLQGGEDMRLVKLAHRHPENHGHSH  
KHHHHHHHHHHHHHSHRGLSGGSAYKQLYSHPHRTDMSHRTKDSSGYLAPAHFKHHSSKMSLSRPVELPQMEKPYF  
LDRPSPTRLDDDLDEVTWRPISIGNVEKVLVTDVTTNFLTVTIKESSTSKGFFKDKR

>Spa\_LOC103361729

MELSAVGESVFAAESIIKRRIRGRWEYLVKWKGWSSQKYSTWEPEENILDARLFAAFEEREREMFGPKKRGPCKPET  
FLLKAKEKAKEKTYEFREAPRGIQVCYPIPEPVITPRAREGLRTVVPTIFPPSAINRGESVHVGPPEPERRPRMTPP  
APLTAQEPLRFPPKRGKPKLHLHYDKDDGSSSAEPEAKRSRLLEEPLAHGLSKMSQRLHHHHHHHHHHHGETSDHSL  
VQLTKRFQEETITPKPSSGQRSTGGAGLSYSCAFSPDVRKSDQRAHRTNCLSRMYIPQPGKLKHRGGHRSHQVTECC  
PAREQPAVISSSQSIHDSARPASSWSPCFTNLDVTVTVDVTMNFVTIRESSTDGFFFRDKR

>Apo\_LOC110965974

MEGVTVGQVFDAECILSKRPRKGFYEYLVKWRGWSSKHNSWEPEENILDPRLLAAFHKREQERELLFQKKGRPRGRPR  
RKILQFAPAAATKDSRSSSTSSGLSSASSSSSEDEDPTKKPKPGPRLHPVPQKRPQIMLAKPDPPRKKGGRKPLHP  
DLRALRQAKLRPPVPLPPPASPRHHQAVRRDDPRPGVKKPLQPASFTYTGLGRSSRDDGSQTSSSFQTSASKPGSL  
GCIWTRSLSSSSSGSAHKSGBPSPQSKNSLSELKRSISETSRDGFVSLKQGGGSLGLHGGFGPTAHRSPLSHRRQDG  
GPTGLVPHKQONSSLSKPSSASPTPRDRANQALSRLALNLQSVKPPPTSLQGNTSGAVAAMARSSLRSGGIMVKGGV  
GKEVRTSGGQSRGLTAGAATEQNRVKEKLAGGGSGRSGRQDKHGLSSQNRNLNELSTGSDSSSSSESEQDAAIFPG  
NSRPSLGNNATESDTETDWRPARSLLEHVFTVDVTANFITVTVKESPTSVGFFFNRRNH

>Apo\_LOC110948480

MEELSAVGQVFDAECILNKRLRKGLFLVWKWRGWSSKHNSWEPEENILDPRLLAAFNKKHEHEKELLMLKRGKPRGR  
RPRKILENVPEAPKSSSSSSSSSSSSSDSSSSSCSSSSSSSDDEDSSHVKQVNPSVTRDLHPVPQKKAQIVMAKQEP  
PKKRSRKPLSPMEKEFPQNGKPRKVLKTTKDEDLPGAIKKPVHPASFTFMGFHRSASAREAVGGQNRSPLAQGGAVKNS  
TSSVSGSRSSVQPASLSMNKSNQSKNVTEGKLSISSISGTSLDLKAASKSGVAALNLNTSKHPIQGTTOHTLSSP  
NGQKPKQAPGSTVQRIPTNTKPSLQSKNASSNQGPGLQPLNLQNKGAQNDAPNGTPTTTPRNATNPARKTTVTQSQ  
ECNPPKSPVTPGRPPARKTQPGADKVREVNEIQTSRVQGRLEKSSVHKSSSTEVOGQHERSASKDKGKAKMNDMSTGEE  
ESSSDSDQDSSYAGQGHSGVGVQNDWKPTRSLEHVFTVDVTANLVTVTVKESPTSVGFFFSIRNY

>Apo\_Cbx4 (Gene ID: 110963665)

MELPAAGEHVFAVESIEKKRSRKGVEYLVKWRGWSPRYNTWEPEENILDPRLLDFAQDRERQEQLMGYRKRGPKPKH  
LLVQVPSFARRSSILADLHGSSLDGDCQKSSPIQMLRPQAQYQLNSNKHQYQPLCREAEQQPNGKKFYQLNGKK  
HHHYQPDCLKVHEPLFVKPREVKAPELANKGYNLPPVLQKQWVRDKDSGCLTKVKDITMELKKLPADLNGHKEPEKAKP  
KEDTLQSNVSSSKLKVKNKNGRIVIVMSKYMENGMQAAKIKNGDSESGEKSPOGTDNSNENQLEKMKLVKKLG  
LMNGFAKHPKDKPTGFNGDCPKAKEQSPKTKPTVTEQDKHVEVRGQGLPADQPLQLTKPNLLPLTSDQGVSSLSDK  
RVGQGGFQGLKRHLSDMDGEEHGRGTRFLSCRSISTPNAASSRGQSSISVDQNGHQSHDGLQDCGYTDQEEPIDLSIVK  
SRPTATQPETQTQAEALTQDLTQTDVQTENQPQTEALKPAEEKKVDSSVSNHEKRAETFPSFQPFGLGNIVITDIT  
NCLTVTFKEYVTA

>Apo\_LOC110961503

MELPAAGEHVFAVEGIEKKRIRKGIYLVKWRGWSPKYNTWEPEENILDPRLLVAFQHRERQEQLMGYRKRGPKPKH  
LLVQVPSFARRSSIPAGFEETSPDAETSPKSDPIQVQRSQPQQYQLNSKKHHQYQPSQEVPADQLTSSKKKFIYQLN  
SKKHHHYEPDPNMYDAQASRLKEVVKVQEPASKPANPGWNLPLALQKQWVRDKDTGCLSKVKELAVEVRKPAVKEAES  
EQALKPNPKDATLPSSISSMKMIIKNKNGRIVIVMSKYMDGNKVHGAKGKHGESSREEKNQNTKPTENNPAHRTKM  
TEHPENGIPKEICSGSSALAAEHPIKCSPKDRQFSKPSPTAEYNTYEVARGQADLPDDLPLQLTASSPPTSWTVDTN  
IPTPTAVDQIRIPSFPGDRKRKLSDPVEDRSVAKIYLTSSFSVPSTVVTTPQDKPMDLHCSGSRQSSSLCSYEALGSQ  
EPMDLSCPKPKRQVEAEVQPEPEPEPEPEPAPEPAPEPAVKDSSPPVTDQTSTKEKSKEAPVKKVSFFMGNIIT  
TDITNSLTVTFKEYVSF

>Apo\_cbx6a (ENSAPOG00000013333)

MEPSAAGDRIFAAEAILKRRVRKGRIEYLVKWKGWAMKHSTWEPEENILDDRILILGFEQKERERELHGPKKRGPKPKN  
FVMKARGQKRETSSRASSSRQNTPRSSSTSSRAASSSSSALPHHLPSSSSSSSTVAPSPKLNLAATHKLKDKIHRC  
HRMSRRPLPRSDPMAATFSNPGGFPSPRMHVSFSETVRIILNRRVKPREVKRGRIILNLKVIDKPGRGGTASGSRNITA  
GRQNIPSRNRIIGKKGEAPYRPFQPLKMLGFPYMGKPFGLQCGGPVFFHSHPGSCSTTGARDRTTSSQYQSPSPSPS  
SSSGEGKSPNTNATAAQPPAAGASPSKDAKSSKPHETQKGQSAKPSAPAPSSDGNPAASAPFLPSSPSSSLEDE  
EEEGAQDHSVSSEGRKNPRQRRAKRQPPTTLPTVAPGDQSSAPAEPQRVPAEGDPDWHPEMAPSCKDVVVTDVTTNL  
VTVTIKEFPSPASGPASPASPENASSPPPATTAEDEPSPAKP

>Apo\_LOC110954475

MELSAIGEYVFAVESIVKKRVRKGNVEYLLKWKGWPPKYSTWEPEEHILDQRLVQAFEEKEQRDRALGHRKRGSKAKR  
LLENTVYTMDLRSAHKTPEKSPPLRLSLTRSLVPEDEDQPYSVHRRDPQPHLAHQKSSRSQFKCLNSNSPSPTQED  
WEGWEEEEEEEEENNVEDDEDREEEEAQEETAKTDSILNGQERTDDWSSTVRPVQVTAEEKSDVWVKPVIGPGEVT  
VTDVTLNSLTVTFRESRVAKGFFRDWGLEV

>Apo\_LOC110969764

MELSSIGDQVFAVESITKKRVRKGNVEYLLKWQGWPPKYSTWEPEDNILDPRLLVLAEEENQEKVRALAYRRKGLRPRR  
LVLRNIFAMDLRSAHKVSEKSSSRLRLSLTRSMSTDVDQVERGGMYRRPARRRSRQRLNRSLTEDPANKPMCPQRKKE  
EEEAMEEDWGGTSEEDKQSECTTEERCEDSLYGQSECSSPPLERQDLEMEVEEKVDADLTAVSTEMWTERSGETS  
QTRQKQSFAGDESKDNALASEARLDVSSVGDGSEWDGEEESVSGWECVEVESRNNNTSVIVSVQGSSETAGEAAVVC  
STAEEERKEEVRGDNQSVTMTMTADSQTDAAAAEHGPKVIVTDVTLNLSLTVTFKEAMVAKGFFFKGY

>Apo\_LOC110961504

MELSAVGESVFAAESIIKKRIRRGWEYLVKWKGSQKYSTWEPEENILDARLFAAFEEREREREMFGPKKRGPKEPET  
FLLKAKEKAKEKTYEFREAPRGIQVSYVPVEPIVTPRAREGLRTVVPTIFPPSAINRGESVHVGPPEPQRRPRPTPS  
APLAAQEPLRFPPKKRGRKPKLHLHFDKEDGSSSVPEAKRSRLLEEPLAHGLSKMSQRLHHHHHHHHHLLHHHGETSDH  
SLQLTKRFQKETTITPKSSSEERNAAGAGLSYSCAFRPGVRKSDQGAHRTHCLSRMYKLLQHGGHGSHDREQPEVIS  
SSQSAHDPSARPSTSSWTPCFTNLDTVTVDVTMNLTVTITRESSTDKGFFFREKR

>Apo\_LOC110963666 / LOC110953509 / LOC110945580

MELSAVGESVFAAESIIKKRIRKGRIEYLVKWKGSWPKYSTWEPEENILDSRLFAAFEQRERERELYGPKKRGPKEPKT  
FLLKAQAKVAKSYEFREAVRGMHITYTPEPVVTPRAREGLRAVVPTIFPPSTINRGESVRIRQPELSSREHQQL  
LQQTSDGLIHMPKKRGPKEPKPRFKDGLGPAISEPHKRRAEQMSHGPHKLSKLHGGEEMRLVKLAHRHPENHGHSH  
KHHHHHHHHHHQHMHHSRGISSGSAYQLYSHPHRTDMSHRTKDSSGYLAPAHFKHHSSKMSLSRPVELPQMEKPYF  
LDRPSPARLDDDLDEVTWRPSLGNVEKVLVTDVTTNFLTITIKESSTSKGFFFKDKR

>Aoc\_LOC111568440

MEGVTVGQVFDAECILSKRPRKGKFEYLVKWRGWSSKHNSWEPEENILDPRLLAAFHKREQERELLFQKKGKRPRGRF  
RKILPAFAATKDSRSSSSSSSSGLSSSSSSSEDEDPTKKPKPGPRLHPVPQKRPQIMLAKPDPPRKKRGRKPLHPD  
LRALRQAKPRPPAPLPPPVAPRHHQAVRRDDPRPGVKKPLQPASFTYTGGRSSRDGSGTSSSFQSTSTSKPGSLSC  
IWTNRSLSSSSSSSSAHKSSPSPQSKNSLSDLKRSISETSRDGFVKVSLKQGGGSLGLHGGFGPTAHRSPLSQRRQDGGP  
TGPVPHKQONSSLSKPSASSPTPRDRANQALSRLALNLQSVKPPAGSLQSNSTSGMAAAVARSSLSRGGIVVKGVGK  
EVRMSGGQSRGLTAGTTEQNRVKEKLGGGSGRGGGRQDKHGLSSQNRSLNELSTGDSDDSSSESEQDAAMFPGNS  
RPSLGNNTTESDTETDWRPARSLLEHVFTVDVTANFITVTVKESPTSVGFFFNRRH

>Aoc\_LOC111562895

MEELSAVGEQVFDAECILNKLRLKKGKLEFLVKWRGWSSKHNSWEPEENILDPRLLAAFNKKEQEKELLMRKRGRKPRG  
RPRKILENVPEAPKSSSSSSSGSSSSSSSDSSSSSSSSSSSSDDEDDNSHVQANPSVTRDLHPVPQKKAQIVMAKQEP  
PKKRSRKPLPSEMKEFPQNGKPRKVLKTTKDEDLPGAIKKPVHPASFTFMGFHRGSAREAVGGQNRSPLAQGGAVKNS  
TSSVSGSKSSVQPASLSMNKSNQSKNVTEGKLSISNVGSGTSLDLKAAASKSGVAALNLNTSKHPIQGTTQHTLSSP  
NGQKKPQAPVSTVQIRPNTKPSLSHKNASSNQSGSLQPLNLQNKGVQSNDAFGNGTPTSGPRNATNPARKTTVTQNO  
ECNPPKSPVTPGRPPARKTQPGADKVREVNEIQTSRVQGRLEKSSVHKSSSTEVQGGHERSASKDGKKAKMNDMSTGEE  
ESSSDSDQDSSYAGQGHSVGVQNDWKPTRSLIEHVFTVDVTANLVTVTVKESPTSVGFFFSIRNY

>Aoc\_LOC111577364

MELPAAGEHVFAVEGIEKKRIRKKGKIEYLVKWRGWSPKYNTWEPEENILDPRLLVAFQHRERQEQLMGYRKRGPKPKH  
LLLQVPSFARRSSIAGFEETSPDAESSPKSDPVQVQSRQPQQYQLNSKKHHQYQPSQVEVPADQFTSSKKKFIYQLN  
SKKHHHYEPDPNMYDAQASRLKEVVKVQEPVSKPANPGWNLPLALQQKWVRDKDTGCLSKVKELAVEVRKPAVKEAES  
EQALKPNPKDATALPSSISSKMKIKNKNKNGRIVIVMSKYENKSVHGAAGKHGESSREKPKQNTKPSENNPAHRTKM  
AEHPENGIPKEICSGSSSLAAAEHPKCSPKDRQFSKPSSTAEYNTYEVARGQADLPDLPLQLTASSPPTSTVTDM  
ILTPTAVDQIRIPSPSDRKRKLSDPVEDRSVAKIYLTSRFSVPSTVATPPQDKPMDLHCSGSRQSSSLCSYEALGSQ  
EEPMDLSCPKPKKQVEFEAQPEPVPEPEPEPAVRDSPVTDQTSTTEKSKEAPVKKVSPFMGNIITDITNSLTV  
TFKEYVSE

>Aoc\_LOC111577320

MELPAAGEHVFAVESIEKKRSRKGRVEYLVKWRGWSPRYNTWEPEENILDPRLLDADFQDRERQEQLMGYRKRGPKPKH  
LLVQVPSFARRSSILADLHGASLDDDDCQKSSPIQMLRPQAQQYQLNSSKKHHQYQSLCREAEQQPNGKKFYQLNGKK  
HHHYQPDLVHEPLFVKPRDVKAPELANKGYNLPPVLQQKWVRDKDSGCLTKVKDITMELKKLPADLNGHKEPEKAKP  
KEDTLPQSNGVSSSKLKIVKNKNKNGRIVIVMSKYMENGMQAAKIKNGDSESEKSPQGTDCSPENQLEKMKLVKKLG  
LMNGFAKNPKDKPTGFNGDCPKAKEQSPKTEPTVTEQDKHVEVRGQQLPADQPLQLTTKPNLLPLTSDQGVSSLPDK  
RVSQGGFQGLKRHLSDMDGKEHGGTKRFLSCRSISAPNAASLPAQSIQVQNGHQSHDRLQDCGYTDQEEPIDLSIVK  
SRPTATQPETQTQAEALTQDLTQTDVQTENQPPQTEAQKPAEEKVDSVSVSNHEKRKEETFPSFQPFGLNIVITDIT  
NCLTVTFKEYVTA

>Aoc\_cbx6a (ENSAOCG00000009696)

MEPSAAGDRIFAFAAILKRRVRKGRIEYLVKWKGWAMKHSTWEPEENILDDRILILGFEQKERERELHGPKKRGPKPKN  
FVMKARGQKRETSSRASSRQNTPRSSSTSSRAASSSSSALPHHLPSSSSSSSTVAPSPKLNSLAATHKLKKDIHRC  
HRMSRRLPLRSDPMAATFSNPGGFPSPRMHVSFSETVRILNRRVKPREIKRGRIILNLKVVDKPGRGGTASGSRNITA  
GRQNIPISRNRIIGKKGEAPYRPFQPPKMLGFPMYKPFGLQCGGPVPFHSHPGSCSTTVARDRTTSSQYQSPSPS  
SSSGSEGKSPTNATAAQFQPAAGASPSSKDAKSSKPHTEQKQSAKLSAPAPSSDGNPAASAPFLPSSPSSSLEDE  
EEGAQDHSVSSEGERKNPRQRAKRQPPPTLPSVAPGDQSSAPAEQPVPAEGDPDWHPEMAPSCKDVVVTDVTTN  
VTVTIKEFFSPASGPASPSSPENASSPPVTTSEDPSPAK

>Aoc\_Cbx7 (Gene ID: 111574404)

>Aoc LOC111570338

>Aoc LOC111577361

```
>Aoc LOC111577322
```

```
>Ape Cbx2 (ENSAPEG000000019197)
```

```
>Ape ENSAPEG00000010635
```

```
>Ape cbx4 (ENSAPEG00000011118*)
```

```
>Ape ENSAPEG00000015378
```

```
>Ape ENSAPEG00000011123*
```

```
>Ape Cbx6a (ENSAPEG00000009256)
```

>Ape\_Cbx7a (ENSAPEG00000011936)  
MELSSIGDQVFAVESITKKRVRKGNVEYLLKWQGWPPKYSTWEPEDNILDPRVLAYEENQEKVRALAYRRKGLRPRR  
LVLRNIFAMDLRSAHKVSEKPPSRLRLSLTRSMSTDVDQVERGGMYRRPNRRRSRQRLNRSLTEDPANKPMCPQRKKE  
EAMEEDWDGTSEEDKQSECTTEERCEDSLYQSECSPPLLERQDLEMEVEEKVADLTLAVSTLDMWMERSGGGETSQT  
RQKQTFAGDESKDALASEARLDVASVGDQSEWDGGEESVSEGWCEAESRNNTTSVIVSVQSGSETAGDAAVVCSA  
AEERKEEVKGDNQSVTTMAVDGQTDPAAAEHGPKGVI VTDVTLNSLTVTFKEAMVAEGFFKG Y

>Ape\_Cbx8a (ENSAPEG00000011079)  
MELSAVGESVFAAESI IKRRIRRGWEYL VKWKGSQKYSTWEPEENILDARLFAAFEEREREREMFGPKKRGPKEPET  
FLLKAKEKAKEKTYEFRRETPRG IQVSYPIPEPVTPRAREGLRTV VPTIFPPSAINRGESVHVGPAPERRRPPTPPA  
PLAAQEPFLRFPKKRGRKPKSLHLHFDEADGSSSVEPEAKRSRLLEEP LTHGLSKMSQRLHHHHHHHHHHHHHGETSDH  
SLLQLTKRFQEETTITPKSSSEQRNAGAGFGDGAHRTCHLSRM YKLKQHGGHRSHHREQPAVISSSQSVHDPSARPS  
ASSQTPCFTNLDTVTVDVTMNF LTVTVRESSTDKGFFREKR

>Ape\_ENSAPEG00000015391  
MELSAVGERVFAAESIIKRRIKRGRIEYLVKWKGWSPKYSTWEPEENILDSRLFAAFEQRERERELYGPKKRGPKPKT  
FLLKAQAKVKAKSYEFRNEAVRGMHITYPTPEPVVTPRAREGLRAVVPTIFPPSTINRGESVRLRQPELSREHQQPL  
LQQTTS DGLIHMPKKRGPKPKPRFKDGLGPAISEPHKRAEEQVSHGPHKLAKLHGGEEMRLVKLAHRHPENHSHSH  
KHHYHHHHHHHHMSRIGSSGTYKQLYSHPHRTDMSHRTDSSGLAPAHFKHHSSKMSLSRPVELPQMEKPYFLD  
RSPARLDDDDLEVTWRPSLGNVEKVLVTDVTNFTLTIKESSTSGKFFFKDKR

>Nco\_LOC104963701  
MEELSAVGEQVFDAECILNKRLKKGKLEYLVKWGRWSSKHNSWEPQENILDPRLLAAFNKEQEKELLILKKGKRPRG  
RPRKILENVPEATKSSSSSSSGSSSSSDSSSCSSSSCSSEDDDDDSNVTPTATPNVRTRDLHPVPQKKAQILVAKQEP  
PKKRSRKPPSPPEVKFEQQNKGP RKVLKASKDADLPGAIAIKPVHPASF TFMGFHRGSPRD TVGSQNKS SVTQGGA VKSS  
VG SERSVQPASLSLNKSSQSRNVETEGKL SISSVCRSTSLDLKAAASKSGVAALNLNTSKHLIQGTTQH TLSSP NGQK  
KAQAPASTP QRLPNKSKAVALPSKNLSNHGSGPQLNLQNKLVKSNAPVNGTAPSVGLRNATLPARKIT ALQDYNP  
PKSPANPGR LQARKSQSGVDMPVKEATEIQT PRVQGR LVKSGVSQSSTVEVIQQRDLAPKD GK KAKINEMST GEEESGS  
DTDQDSSYVGQDGSMVMQNQDWKPTRSLIEHVFTDV TANLVTVTKESPTS VGFFS NY

>Nco\_LOC104943130  
MLLCFFIDTHHSILVPQVPSFARRSSILADLHEASLEESCLKPSPMQMLRPQVQQYQLNSKKHHYPQPLCRERDTEPP  
AHGKKFFYQLNSKKHHQYQPDCLKHDPFVVKPREVKAPELVNKGYNLPPVLQKQWVRDKDSGCLTKVKDITMELKKLP  
ADLNHNEPEKVQPKEDASLTQSSNGGSNGKLKIVKNKNNGRIVIVMSKYMENGMAAKIKNSGSDIAGKPLQPADSS  
TENHLEKMKLVRLGLMNGFAKNPKDKTTFPSSGFKVHCLKEKQQSPKTEPTVTDQDKPVRVRGQGQLSEDQPLQLTS  
CKGTTKPNLLSLPLDRGVPSPLDKRGNQGEFGQLKRHLSDPDSEDHGSSKRFLSCRSISPPHATSPPTQSTNQNTQS  
PTGLTDCGYADQEEPIDLVSVKSRPKATQPETQTETVTQSETRTHDETDTHTDVRTETETTEEDKVNLSLVCNHEKRK  
EETFPSLQPFNLGNIIVITDITTNCLTVTFKEYITA

>Nco LOC104966035

I L C P P P H L K V I D K P V R G G A S G R N H T V G G R Q N I P S R N R I I G K K A E G P Y R P F H S P L K M L G F P M Y G K P F G L Q C G G P V T F S S  
A Q Y N S A P S Q H N S S P S C K P S P S Q H N F S P S S S E G K S T T G V S L P P S S E A P E S S N P V G A S S S S S V K D Q E D E T P K G R K R Q L P  
D D Q S P G N E T P A E P Q I A E G N P N W H P E M A P S C K D V V V T D V T S N L L T V T I K E F P S Q N T A Q S E D P E T

>Nco\_LOC104968319

M E L S A I G E Q V F A V E C I L K R R V K G N V E Y L L K W K G W P P K Y S T W E P E E H I L D Q H L V K A Y E E K E Q K E K Q L G H R R K G P K A K R  
L F L Q

>Nco\_LOC104958407

M E R S S V G L I G D Q V F A V E S I T K K R V R K G N V E Y L L K W Q G W S P K Y S T W E P E D N I L D P R L V L A Y E E H Q E K I R A L A Y R R K G L R  
P R R L L L R V R R H L Y P H L T L L Y L S L P I L T A H

>Nco\_Gene ID: 104965337)f

M E L S A V G E S V F A A E S I L K R R I R R G C W E Y L V K W K G W S Q K Y S T W E P E E N I L D A R L F A A F E E R E R E R E L F G P K K R G P K P E T  
F L L K A K A K E K T Y E F R R E A P R A I Q V S Y P T P E P V I T P R A R E G L R T V V P T I F P P S A V N R G E S V Q I R P P E P E R R P R T T P S A A  
L T D L E L G V R I P K K R G R K P K L H L H F N E T V D G G L S E E P N T K R S R S L E E P V S H G F S N M S R H L L H H G E A S D H S L M Q L T R R F E  
E K T T I T P K H S S E Q R H A G L S F S A F N S D V R K R D Q L K H M T K C L M S V R R P S S S A E H R K H Q V K E C S Q P A V R S T E N S D K A T Q P  
A S C W T P R L T N L D T V T V D T M N L L T V T V R E S S T E K G F F R E K R

>Nco\_Cbx8 (Gene ID: 104943131)

M E L S A V G E R V F A A E S I I K R R I R K G R I E Y L V K W K G W S P K Y S T W E P E D N I L D S R L F L A F E E R E R E R E L F G P K K R G P K P K T  
F L L K A Q A K I K A K S Y E F R G D A V R G M H I T Y P T P E P V F T P R A R E G L R A V V P T T F S P S T V N R G E S M R I H P P E L S T R E Y Q Q P S  
L Q I S G P D E L I H L P K K R G P K L P R F K D G S C S P A I F E P H K R R A E E Q G S H V P H K L T K L Q G G Q E M R I K V A H R H P E I H S H K C  
H H H N H H H H S N N R G F S G G S S F N Q L Y S E R S L H P H R T D S H R T K D S S S H L A P V T F K H Q S R M S P S L G R P V E P P Q M E K P Y F M  
D R P S P T R F D L D V D L D E V T W R P S I G N V E K V M V T D V T T N F L T V T I K E S S T T K G F F K D K R

>Cse\_LOC103382231

M E G V T V G Q V F D A E C I L S K R P R K G K F E Y L V K W R G W S S K H N S W E P E E N I L D P R L L A A F H K R E Q E R E L L F Q T K G K R P R G R E  
R K I Q P T P P T T K D S R S S S S S S S L S S S A S S S E D E D P S K A K P T P R V H P V P Q K R P Q I L L A K P D H K K K R G R K P L H P D L K A L  
R Q A K S K L P P L S P P P P P S P S P S L P P P G L A A P Q R H H P S V R P S R E E L R A G V K K P L Q P A S F T Y T G L R T S R N E A S S A S N S  
A F Q V S V S P K P G A L S C A W T N R S L S S P S P G S S H K A T P S A Q S K H M T S E L K S S S R S D G F K T S P L K H G S G T S G S G S L H G T F D R  
A A I S Q R S Q S N Q R R Q D G V S A Q T G S G Q H K Q I P Q I S S P R D R A N Q A L S L R A L N L Q S V S R P T C G A V F Q G N N T G G A A V R S S S S R  
S S G I M V K S G V K D G R P S S C G Q R S G T N M V V G E H I R G K E V T P G G A S R G N G S S A N R S L N E L S T G D S D E T S S S E S E Q G V P L Y  
P A A N S R P S L G S S T A D S D T E T D W R P A R S L L E H V F V T D V T A N F I T V T V K E S P T S V G F F N S L N H

>Cse\_LOC103392533

M E E L S A V G E Q V F D A E C I L N K R L K K G K L E F L V K W R G W S S K H N S W E P Q E N I L D P R L L A A F N K K E H E K E L L R N K G K R P R C  
R P R K I V K N Q V P E T P K S S S S S S S S S S S S S S S S S S S S E D D D D N D V E Q A N Q I V R T R E N H P V P Q K K A E I V V A K Q E P P  
N K R S K K P A T P E G N E L P H K R G L R K N P K M S N D T D H P G A I K K P V Q L A S Y T L M G F Q Q G L G R D T V G Q G V G S L G H G G P Q K S A V G  
S S K S T Q S P S L S L Y K S N K S R D V T E G K T S G S S K D T E K H L E L N T S S G K S N G V A A L S L N T G K N P S Q A N V R H S L S S P N G Q K K P  
Q G S V S G L Q R I P H A K A V G F G P S K N N N S S Q G S G F Q P L N L Q N K P A Q N S T T S E N E A T L L S G T K I A P K P A R K A N A P Q N Q D C N P  
N K S P E S P C R L E A G K N Y S E A N K T K E A A E I R S T H N Q G R L E K S S V H T F P Q Q E K F A Y K T G R K M N D M S T G E D E T S S D S D Q D S T  
C S G K D S S M N Q T Q D W K P T R D L I E H V F V T D V T A N L V T V T V K E S P T S M G F F S V R N Y

>Cse\_LOC103384237

M E V A A A G E H V F A V E S I E K K R S R K G R V E Y L V K W R G W S P K Y N T W E P E E N I L D P R L L D A F Q L R E R Q E Q M M G Y R K R G P K P K H  
L L V Q V P S F A R R S S I L N D L H E A S L D E E D E K C D S T S P V H V L R P Q G T Q Y Q L N S T N H H K Y Q S L C R E K E M E P P T N G K K F F Y Q L  
N S K K H H H Y Q P D V K D F V H E P T F V K P P E V K V P D L A N K G Y S L P P V L Q Q K W I R D K D S G C L T K I K D I T M E L K K L P A N L N G H R  
E S Q S T G L K E D S L P Q S N G V S S S K L I V K N K N K N G R I V I M S K Y M E N G M Q S A K I K N G D S E P T G N P E S G A E N H S E K M R L V Q  
K L G L T N G F V K N S G D S T V S T S G F N G D A P Q E R E Q S T K M Q P T V T E Q A K H V G V R V Q G Q L P A D Q L L Q L T T K S N L P S L P V D R G  
V P S A L D K R E T Q G G C Q R L K R P L H D T G T E D C G T T K R F L S S R S F L D A S A A P S P T Q S T S V D Q N G Q R S L E G L Q V C G Y T D Q E E P  
M D L S M V K S R A N S E A C T S A Q P Q A Q T T V E T L V C S Q D E K H T Q T Q T D S Q R E T Q T P T E T R D T S E E L D V D S L S E P N K E K R K E E T  
F P S F Q S F L G N I V I T D I T N C L T V T F K E Y V T V

>Cse\_LOC103393067

M E L P A A G E H V F A V E G I E K K R I R K G K I E Y L V K W R G W S P K Y N T W E P E E N I L D P R L L V A F Q H R E R Q E Q M G Y R K R G P K P K H  
L L L Q V P S F A R R S S I P A G F E E A S Q E T E G G V K S D P V Q V Q R P Q I Q Q Y Q L N S K K H H Q Y Q P S S P E V S A D Q L A N G K K K F I Y Q L N  
S K K H H H Y E P D P N M F D T Q A S K L R E V V K V Q E P A C K A N P G W N L P L A L Q Q K W V R D K D T G C L S K V K E L A V E R K P V V K E A E S  
E H A L K P D P K D A T L P S A V S S K M K I I K N K N K N G R I V I M S K Y M D G N K V H A A K G K H G E S S G E E K P M S T K P S E N P G Q R T K I  
G E H L E N G V P K E I C N G R S P P A A E H P I C S P K N R H F S K P S P S T A E E Y N T E V A R G Q A D L P D D L P L Q L T A S S P S M S W A M D T N  
I P T P T A V D Q I R I P S Y P G D R K R K L S D P V E D R G V S K T F L A S R S F S V P S T V V P P P Q D K P M D L H C S S R R P S S N C T Y D F V D S G  
G Q D E P M D L S C P K T K R Q T E P E L R P E P Q P E P E I E P E P V Q K S E T Q P A D A E A P V M E D T P K S A E K S K E A P V K K I S P F M G N I I  
I T D I T S N S L T V T F K E Y I S F

>Cse\_Cbx6 (Gene ID: 103383217)

M E P L A A G D R I F A A E A I L K R R V R K G R L E Y L V K W K G W A M K H S T W E P E E N I L D D R L I M G F E Q K E R D R E K S G P K K R G P K P K H  
F M K A R G Q K R D P S S Q N A S T R Q S V S R S A S S R A A P S S S T S T S S S A A A T P H L P S L S S S S S A I G P S P K L N S L A A T H K L K K D I  
H R C H R M S R R P L P R S D P M A S S F S S A G G L P S R M H V S P F S E T V R I L N R R V K P R E V K R G R I I L N L K V T D K P G R G G A S A G S R N

ATSGRQNI PSRNRI IGKKGEAPYRPFQ PPLKMLGFPMY GKPFGLQCGGPVPFHSNSGSRSSAAVRNNHAAASQLKTPP  
SPSSSSSSSE GKSSPTVASQSRPGSSAPPSSHDPEPSDPPTETETEKHGANISDPSFTCENTAVPSSPFLPSSPSSSLED  
SVEQEDKEAVDSNEPHQC NANIPSP TAAAPAAAPPASQSANPSEPQRVPVEGD PDWHPQIGFSCKD VVVTDVTTNLVTV  
TIKEFPSP ASGPASPSSAPENASPPPPA ISSDDPSPAKP

>Cse\_LOC103382143

MELSAIGE QVFAVESIVKKRVRKGNVEYLLKWKGWPPKYSTWEPEEHILDQRLVQAYEEKEQ RDRALGYRRKGAKGKR  
LLLQDTVYTMDLRS AHKAPEKPPHLRLS QSQSQVSEDEDEDES YGSSRYDLRHQDEKSR TSLIKYLDSDPPSPSQEDW  
NEEEEEEEEEEEEEEDHVEEEEEETVVVETETTDGDVTEKTRWCSTITPDEVTVLE DSWSPVISPGDVTVTDVTLN  
SLTVTFRESRAS RGFFRGWGLEV

>Cse\_LOC103393332

MELSSIGDQ VFAVESITKKRVRKGNVEYLLKWKQGWPKYSTWE PEDNILDPRLLV LAYEENQE KIRALAYRKKGLRPRR  
LVLRNIFPMDLRSTNKVPEKPPRLRLSLTRSMSTDVDGRTIRSRQRRPVPKRVLEGQSNRRV GALRKKV EEEPTTED  
WSSNSEEKQELESATEERREDSVYQSECSSPQLERQDSEMEVEDKVDASLTLVGSDTWTGDSDGGTCETRRDQIF  
VFDQSKDDSVTPVVIPADPVREESEVDEGEADIKSHSDGLRLDTS DTTTVMGVEERSQTGETPSNTAVCSSTEVEKE  
EEEKEAKDDNQSALTMLPG DGSPPASPERPGKVIMTHVTINS LTVTFKEATVA EGFFKGY

>Cse\_LOC103384236

MELSAVGER VFAAESI IKRIRKGRIEYLVKWKGWSPKYSTWEPEENILDQRLFVAFEQRER ERELYGPKKRGPKPKT  
FLLKAQAKDKLRSYEFRNESIRGRPI SYQTPDAVTPRAREGLRAVVPTIYPPSTVNRGESICVRQLELSSIEHQEPQ  
QTSTGGLVHI PKKRGPKPKPRFKDNVCSSISTLPVSE PQKRAEEQESHSPHKLAKYQEE IRLFKAVHRHPENHAH  
SRKHHHHHHHHHHHQQQQQQQQQQQH QHHRDQHHSYDPRPHPHRTDLD SHRTKEACTYLMPTHFKNKSKMIPSQRRPA  
QLPLMEKPYFLDRPSPTRLDDMDKV SWRPTLGSAEKVLVTDVTANFLT VTIKESSTS KGGFFKEKR

>Cse\_LOC103393068

MELSAVGES VFAAESI IKRIRGRWEYLVKWKGWSSKYSTWEPEENILDARLFAAFEERER EREQFGPKKRGPKPET  
FLLKAKAKEKSYEFREAPRGIQVSYVPPEPVKTPRAREGLRAVVPTI FPPSAINRGESVHLQPPEPERPRATPPTA  
ASTLQELGRFPKKRGRKPKLQLHYDEDESSSAEPDTKRARSVQEGDLSNSSRRLHHHHHQQHQQHHTVKEASDRSL  
IQLTKRFQVETTITPKPGGEHRLPGDAALAYTCAFS PDMRTSEPRGHSRPESLRRTCVSQPEKMKHQVKMSCRAPQSQ  
STCDFPARAA SSWRPSLSNLDRVTVDVTMNL LTVTIRESSTD QGFFFREKR

>Sma\_Cbx2 (ENSSMAG00000012696)

MEELSAVGE QVFDAECILNKRLKKGKLEFLVKWRGWSSKHNSWEPQENILDPRLLA AFNKKEQ EKELLRNKG KRPRG  
RPRKIPEN VPEATKSSSSSSSGSSSSSSSSSSSSSSSTSSSEEDDEDGQVQQAAPSIR TRELHPVPQKKAQIVVAKPE  
PPKKRSRKPLSPEVKEFQQNKAPR KILKTSKADLPGA IKKPVHPASFTFMGFHRGSPRDTAGSHNRGSLTQGGAVKN  
SPGSGVSGRSVQPASALANKSSQSRNVSDGKLSVSGMSGGTS LDLNLTAA GSKSGVAALNLT SKHPIQGTTQHTLSSP  
NGQKKPQGPVSALQRPNTKAVASVPSKNASAIQGSVPQPLNLQNKSAQ GKDAPNGTTPASGLRNATHPARKTTVTQ  
NQEYNPPKSPAIAGR LQTRKNPPGADKVKEATEIQSSRVQGR LDKSGVHKASTEVL SQQERAA YKDGGKAKMTDMSTG  
EESSSDSDQDQDSPYAGEDRSLNPN QDWKPTRSLIEHV FVTDVTANLVT VTVKESPTS VGGFFSLRNY

>Sma\_Cbx4 (ENSSMAG00000014969)

MELPAAAGEH VFAVEGIEKKRIRKGI EYLVKWRGWSPKYNTWEPEENILDPRLLVAFQHRER QEQLMGYRKRGP KPKH  
LLLQVPSFARRSSI PAGFEDTCHDAEVGLKSDPVQVQRPQ PQYQLNSKKHHQYQ PSSQEV PADQLTNGKKKF IYQLN  
LKKHHHYEPDPNMYDTQASRLKEVVKVQEPACKQANPGWN LPLALQQKWVRDKDTGCLSKVKELAVEVGKPAVKEPES  
EHVLKPNPKDTALPSATSSMKI IKNNKNGRIVIMSKYMDSNKVHGAKGKHGESSEEKLQNTKPSENNP AHRTKM  
VEHPENGIPKEICNGSSLPAAEHPIKCSPKDRHFSKPS PSTAAEYNT EVARGQADLPEDHPLQLTTGSP PMSWAVDTN  
IPTPTAVDQIRIPSTSDRKRKLSDPVDDRSVSKVYLNSRSFSVPSTVATPPQDKPMDLHCSGRR LGSTCTYEAADAG  
SQEPMDLSCPKTKRQVEPEVQPEPAPAPEPEPVDGDTSPVMEDTEKST EKEEAPI KEISPFMGNIITDIT TNSI  
TVTFKEYVSF

>Sma\_ENSSMAG00000011638

MELPAAAGEH VFAVESIEKKRSRKG RVEYLVKWRGWSPKYNTWEPEENILDPRLLDAFQDRER QEQLMGYRKRGP KPKH  
LLVQVPSFARRSSILADLHEASLDQDGCEKSSPIQMLRPQGGQYQLNSKKHHQYQPLCREREAEQQTNGKKFYQLNS  
KKHHHYQPD LKVHEHIFSKPRDVRAPELPNKGLNVPVVLQQKWVRDKDSGCLTKVKDITMELKKLPADLNGHKEPEKV  
KPRDALPQSNGVSSKLKIVKNKNNGRIVIMSKYME NGMQAAIKSGDCDDTA EHPRQGTDSGAENHLEKMKLVKK  
LGLMNGFARNPKDKPAVPSSGFNVDCPRERHQSPKVEPTATEQDKHVGVRGQGLPADQLLQLTTKPNLLSLPLERGV  
PSALDKRATQGGFQGLKRHLSDTDCEEHGSNKRFLSSRSISAPNAVSPPAQSISIDQNGHRGDVGLQVCYADQEEPI  
DLSVVKSRPIAAASASQPEKYTQAE TLECTRDKTHTQAE TQTQADAQTETQLQSETQNAAEKAKVDSLVSNN DERR  
EE TFPSFQPF LGNIVITDITTNCLTVTFKEYVTV

>Sma\_Cbx6a (ENSSMAG00000021207)

MEFLVKWKGWAMKHSTWEPEENILDDRLLLGFEQKER EREMNGPKKRGPKPKNFVGKARAPKREPSSKASGSRQTTPR  
SSSGRATPSSAASARLLPSASSSTIAPT PKLNSLAATHKLKDDIHRCHMSRRPLPRSDPMAS TFSNPGGFP SRMHVS  
PFSETVRILNRRVKPREVKGRIILNLKVIDKPRGGGARNITGRHNI PSRNRI IGKKGEAPYRPFQ PPLKMLGFPMY  
GKPFGLQCGGGPLAFHSQTGSCSS TGARDSHTTSSQYSPSPSSSSCSEAKTPTTSAARSQSATEASPS SEDPKPSK  
PHTETQKGQSAKHSAPAPSSDAKAVGSASPFLPASPSSSLEEEEEEGE GALGRLVSSSEGGRKNPRQRRARRPLPAA



LLSVSPGDQSPTPTPEPRRVPAEGD PDWHPMAPSCKDVVVTDTVTTNLVTVTIKEFPS ASGPASPSASPENASSPPTA  
TTTSDDPSPSKP

>Sma\_Cbx7a (ENSSMAG00000006170)  
MELSSIGDQVFAVESITKKRVRKGNVEYLLKWQGWPPKYSTWEPEENILDPRLVLAYEENQE KIRALAYRRKGLRPRR  
LVLRNIFAMDLRSAQKVAEKPPRLRLSLTRSMSTDVDQGERSSMFCSQVRRKRVGVKRGPDRLRPLRTKEEPMEGD  
WRDIEEEKQESSESVEEIREDSLYGRSECSPPLLERQDLAVEEKVDADLTVEGLETWTDSDGRVCETFACNQSKD  
SAAVPAARAGDAVTAAGDRSNWDRGVVEVESGSECPRLERNDTITVIVSVQGSSETAVAAAAAAVVACSTAEERADNQ  
SATTTTTTPG SQSAPAAAEHPGKVIETEVTTINSLTVTFKEAMVAEGFFKGY

>Sma\_Cbx7b (ENSSMAG00000006575)  
MSPQGNVEYLLKWQGWPPKYSTWEPEEHILDQRLVQAYEEKEQ RDRAIGHKRKGSKAKRLLQLNSVYTMDLRSAHKVP  
EKPPRLRLSLTRSLVPEDEDEDEDELYGACTQGPGPRLAPHKGEPGRSQFTCLDSSPPSPAQDDWEGLGEDEDEEED  
NVEDDEEEMEAQKGTTLNGQERTERWSAAVGPDEVAASD DTWRPVVGPAGEVTVTDVTLNSLTVTFRESRVAKGFFS  
HWGLEV

>Sma\_Cbx8a (ENSSMAG00000014960)  
MELSAVGESVFAAESIIKRRIRGRWEYLVKWKGSQKYSTWEPEENILDARLFAAFEERERERELFGPKKRGPKPET  
FLLKAKAKEKAYEFRREAPRGIQVSYSPPEPVITPRAREGLRAVVPTIFPPSTVNRGESVHVRPPEPERRPRPTPPAA  
LTLHESGRFPKKGKPKLHLHYDKNSGGSAEPDTKRSRLAEPPDSHGLSQMARPLHHHGETSDRSLQLTRRFQEK  
TTITPRPSSEQRHAGAGLSFYTCFSPDARQSDQRGHRTGCAQGSMSVLKHRVKEFGRPADLSTPTVSTRDSSAPPA  
SSCWTPSFTSLDVTVDVTTNLLTVTIRESSTD QGFFRDTR

>Sma\_ENSSMAG00000011628  
NMELSAVGGERVFAAESIIKRRIRKGRIEYLVKWKGWSPKYSTWEPEENILDSRLFVAFEQRERERELYGPKKRGPKPK  
TFLKAQAKDRAKSYEFRSEAVRGMHITYPAPEPVVTPRAREGLRAVVPTIFPPSAVNRGESIRVRPPEFGGREYQQP  
SLKQTVADELIHVPKKGKPKPKPRFKESGCSPATSEPHKRRAGELGQGPBKLTKYHGMEELRLFKVAHRHPESHGHG  
HKHHHHHHQHQQHHQHNRLESGSSYKQLYSDRSPHPRVDTDTHRTKEGSTYLVPAHFQKQSKVSQSLSRPAEQPL  
MEKPYFLDRPSPTRLDDDLDEV SWRPSVGGVEKVLVTDVTTNFLTITIKESSTS KGF FFKDKR

>Ame\_Cbx2 (Gene ID: 103045429)  
MEELSAVGEQVFDAECILNKRLRKGLYLVKWRGWSAKHNSWEPQENLLDPRLLAAFNKREQERELLQKRG KRPRG  
RPRKITED TVPTVSKSSSSSSSSSSSSSSSSSSSSSSSSSSSEEDDDDDNDVNGDRKPKPSRPRELDVPVQKKA  
QIVMAKPDPP KKKRGRKPLTPEL KALKQSQAKCIRKPMKDPKPLDLGSIKKPLMPASFTYTGMNRAASREPLAVQSR  
GSFTHNSPAKSSPNTQGTGRPAGSLGRLSQGKSTADFKLSDMGSGGLDLKASACKSPGVASLSLHNSKLTACSTNGQA  
TGGTPNRTKKETPTQSPMQRNSNKPATTALSSVKSSSNLSTSTQPASLHVASKIEKGTGSSVVGVS IQGVSVRNSG  
SAVRKGPAQEKSLLINPASQAAGLMVGTRNNIIPVIGIDRVKSEDSSDPAEKLKANQGRHQKSFSTLDRNGLKGT  
KAGKTLSEMSTGEEGTSSSEPDSSFSKSQLPIGINTS QDWRPTRSLIEHVFTVDVTANLVTITVKESTSVGFFG  
IRNF

>Ame\_Cbx4 (Gene ID: 103045489)  
MELPAAGEHVFAVESIEKKRVRKGRFEYLVKWRGWSPKYNTWEPEENILDPRLLVAFQNRERQEQQMGYRKRGPKPKH  
VLTQVPSFALRSNLSGLQEASQDNSSYLKMSVDPAQTQQYQLNSKKHHYPYQPICKESSGDTLVNGKKKHYYQLNSKK  
HHHYQPSTKMYQKVETEPAQTLQKQWVDKDSGCLGKVRDITMELEKLPASLDGNGKPKLAMKDVTVQVSGISSKLKIV  
KNKNKNGRIVIVMSKYMENGTAAKIKNGEVDMGVKQQKLQENQSSAVTDSVVEKNRHSKKHSPENGWKKDSKDETR  
PLPCGLPNGASFPAVDGSVTSSPLAVKTNKSEQKSCSPDLDDQPVQLTTKSSLNPKPLDKGALHHFDQRNVLGALKRR  
NSEPRQDQSEAKKFTFRSLSAPGTSHCQNNSIHHNGHQSNGHAMELDCQDEPIDLSCSRARKENNSVINQCINGG  
SKRAEHAAGPQSTRTEKE QDLKPVSSFTPFLGNIITDVTANCLTVTFKEYVTV

>Ame\_LOC103031044  
MDLPVAVGEHVFAVEGIEKKRVRKGRIEYLVKWRGWSPKYNTWEPEENILDPRLLVAFQNRERQEQQMGYRKRGPKPKH  
LLIQLPAFARRSSSILAGLQETSLDDENQLKMDCLQMHRSPQYQLNSKKHHYQYQNSKEIPAEPHINGKKKHYYQL  
NSKKHHHYQPDPMYDQOPTKPKVEKVGHDPSIKGWNLPALQKWARDKNGCLNKVNDLAVEHKQLPATVNKEQQAL  
KTSLEKPSLNGISSKMKIIRNKNKNGRIVIVMSKYMDNGVQSSKVKNGDLSGMEKPHLAEESLNGNRNGIIPVTPGQ  
ENGVAKDNGVYSSSATSSNGHKVPHKKIDLPRTKTAVDVHDKADQKMDIDLSDQPLRLSTKANSSPVSVSSETDC  
ARYQPGHRKRNLSPEHDGGIDCKRFISSRSISAPNPVFSSPQREPMDLHCSGQNTNTNRSYSYDFTDTIPEPIDLSC  
GRTRLQAETCGNSAETPVTVEEDTPQTSEKSEEPV SYFKPFAGNIITDVTNCLTVTFKEYVSI

>Ame\_LOC111194212  
MFKNLSLTD AHLCPQGRLOYLVKWRGWSAKYNTWEPEENILDPHLLVTFQNRREYQEQQMGFRKRGRKPKYHLKQVPSF  
ARRPGILSSLQEALSNGKKKHCHYHLKSRKHHHNQVDAKMPKVKEEPKGSWNLPQVLHQQWIQNKVSECLNNVRDITK  
ELEKLPAVGIGETSELGSIIPREAPASGMSSSKLIVKNKNINGRIVIVMGKYAEGGTQGTGNSVENESDITGKNRHS  
AENDCKEENEDEIELSPCRFTVANMENNLKEEGVTKSIPFLNPSEKSIHLCLDPRSGGQAQKRRFSEPIEQDSEVVR  
FLSSENTGVPISGFSQCQIKNSHIDGRQHSNKQCFELFGCQDEPIDLSYSRKLRSPIPDKSQINRNSKASEKQIESLK  
EQTEKEPESTLI QSFTPFLGDVIITDVTNCLTVTFKEYVTVWK

>Ame\_LOC103038090

>Pna\_LOC108432204  
MDLPAVGEHVFAVESIEKKRVRKGRIEYLVKWRGWSPKYNTWEPEENILDPRLLVAFQNRREQEQMGYRKRGPKPKH  
LLIQLPAFARRSSILAGLQETSLDDENQLKMDSLQMHRSQPQQYQLNSKKHHQYQPNKEIPAEPHINGKKKHFYQLN  
SKKHHHYQPDPKMYDQOPTKPEVKGHDPISIKGVALPPALQQKWARDKDTGCLNKVKDLALEHKQVPVTANKEEQTLK  
ISSCEAAVSSGISSKMKIIRNKNKNGRIVIMSKYMDNGVQASKVKNLDDSGMERPHQTEESINGSAGNVLTVTSGQE  
NVGSSTASNSYVHKVPHNRFELSKAKTNTVEVEOKTEOKTDTIDLCSDPELOLTSKPSSPKSIVTNAPSOKDSTSYO

PNHRKRNLSEPNEGGS DCKKLLSSRSISAPSAVFSSPQREPIDLHFGSKSTRRTYSYDFTDAIPEEPIDLSCGKTRLQ  
AEPANPHSTVEDTPETSEKSEPT **SYFKPFAGNIIITDVTNCLTVTFKEYVSI**

>Pna\_LOC108410419

MELPAAGQH **IYAVEHIEKKRIRKGRIEYLVKWRDWSPKYNTWEPEENILDPHLLVDFQKRER** QEQVMGYRKRGP KPKH  
LLMQAQS FARRSSTLSGLEEVKSGCLKTAVQTQRSSKTHHPYERICKKSLVEPLADGKPQLNSKKHQP NRKIYQKVKE  
TEAAKD GWSIPQALQQKWVQNPVAKLKDITIELEELPTNVRCGGKSELGSSSLIAKEAHASRISTKLKIVQNKNINGRI  
VIVMSKYMENATQDPKMIHSEADLGVKQLLDNESKVAEKLRLHSKNPNFENGCEKDSKD KAKPPPSGLTNGPFHPVAND  
YITSSLLAAETDKPEELSSSTFNGHFKSSLTAKPSEKDVIAYSQQRSPHGAHKRQYSEPDNERDTEANSAPNSGPSQF  
QSNIGHQHSNRHRELQDKPMDLSCSQLRKEGKSITDSQVKWNSEKEEGPQPEWTEKO **PECEPFPTFMPFFGNIIIT**  
**DVTAHCLTVTFKEYI**

>Pna\_Cbx6 (Gene ID: 108436630)

MELSAMGDR **VFAAEAILKRRVRKGSIEYLVKWKGWALKHSTWEPEENILDGRLITAFEQKER** EQELYGPKKRGP KPKN  
FLLKARAQTGETSSRGSSARHTPPHSSSSAAVTPNPSSSSSSASLAPT PRLHSLAASHKLKDDIHRCHMSRRPLPRP  
DPDGSSSFSSRLPISPFSETVRILNRRVKPREVKRGRIILNLKVIDKYGGGATNRRPAQTQQGRAQLPSNRRIIGKKQG  
DMPYRPFQPPMKMLGFFMYGQPFGLQPCLPVSVQTSKRAGSTPVAKGRGPGRP SKPKFPFQSPSPSSSSSGSES DAPS  
PPQIQPGPPQAPETAPSPPVLSPETPSRCSGVPQSRSSGAKPGSASSPTSFLPSSPSLSSSSSSPEDEDERAQKL  
PAPPKGGRRKPCRFRASEGANSRPTAEKKALKRGN **PDWRPERAPSCANVVVTDVATNQLTVTIKEFCCK** GASSTDST  
PPSPSQAKSPSFSTLSGT

>Pna\_LOC108413245

MELSAAGDR **VFAAEAILKRRVRKGRMEYLVKWKGWAIKYSTWEPEENILDERLVAAFEQKER** EQELYGPKKRGP KPKT  
LLLKSRAQASDGTPRVPEFKHTRPQSSSKPPPPPLTPSPYPPSCPSNAKLQSGAAQPKLKKDIHRCHMSRRPLPRPD  
PLAQSVGHSLSPFSETVRILNRKVKPREVKKGRVILNLKVIDKAGNSGVANNRRT PSTAHQSYIGRQKVPSNRNVIGK  
SRRFGDVSYRGLPLPVSGAGFSVFGKAFAEHSMDPSGNQPKLEHSGHKPGKSLSLQSLSQSSKLMTSDVPKALSEAPP  
SASSSEVSDGESHLTSSAQSHQPSLAHQSSKVNPAI LPLPKPSNQLTDLKPNSSAAKSVLPSSPMFSSSSSSSSSSSED  
NEHILDLSVPHGSDRAKRHHHFCRHQQPKLPEI PMSEEASEEEEE **LDWHPEMVAQCANVVVTDVTTNLLTVTIKEFC**  
**HPHGLPPSASSPCYANHFSASNKTKPQP**

>Pna\_Cbx7 (Gene ID: 108413508)

MELSAIGEQ **VFAVESI IKKRVRKGHVEYLLKWKGWPPKYSTWEPEEHILDPRVLAYEKEKEH** RDKAVGWKRGP KPKR  
LFVQIDHMDQKFQAKGGTIYRQLVQHKKRKRSSRDPSVEDWGGREEEEEDEEEDESTREEELETDRATPNSSCF SFSG  
NVATEGWSSIIGSKEVTVSPMH **EEWRPVMGPEEVTVDVTINSLTVTFREALVAKGFFRSWELEF**

>Pna\_LOC108441212

MELSSLGEQ **VFAVESITKKRVRKGNVEYLLKWKQGWPPKYSTWEPEENILDPQLVLAFEEKEE** KDRAQAHRRKGLRPRR  
LILRNIYTMELRSAHLPEKPTPRI RLSSLTRAVGAELDQNGRRYRTREGGVYHHRHEKRKSRHYSSKPPVIAENPRQR  
PLTHQKDIMEEEWEDEEKEGKEQEKRKKKKTEKDEKTTYSRHDIPSAQEMTG DHI PSAKQKAVMANQSEHCALSC  
ERGDQLTKHVHTETISVQRLTDQSAVSTITETHEPIKDRSGGVASAPVSHNETKIDQSLKSSSELVYSAKEVGLIDRV  
QKRASVICLIDSCMQDQVKEAGQTDVSADSTEKETDEDEVTAECTTTLQLSAEVRTDQSQ **GPGSTEHPGKVI VTDVTI**  
**NCVTVTFKEAMTA** EGFFSGYGLQV

>Pna\_Cbx8 (Gene ID: 108424812)

MELSAVGER **VFAAESI IKRRIIRGRMEYLVKWKGWSPKYSTWEPEENILDSRLFAAFEERER** ERELFGPKKRGP KPKLT  
FLMKAQAKARSYEFRGESSRIRITYPSTDALAAPRAREGLRAVVTIFPPGTVNRGESIRLPPPEPRELSPRP  
TSDGFIYTPKKRGRPKLRFSDGYSSGLLHPDKAKMSTEESMSGIPSKMARLELGEDDEDSEDRCSDLRAMKMSHRHQ  
ASPVPYPKPHRMIPMSDWLSHSSRMAANFQDCRTRDHLSHLHRKHLKHLKHLSHHRAFETVDQAARLQQQKPTLI AKI  
PVARILGEPEEEEEDEEED **DTWSPCFSSVEKVIVTDVTNFLT VTIKESSTD** DEGFFKDKR

>Pna\_LOC108432169

MELSAVGER **VFAAESI IKRRIIRGRMEYLVKWKGWSQKYSTWEPEENILDERLFAAFEERER** ERELFGPKKRGP KPKET  
FLLKAKAKASAKNYEFRREMSREIRVSFPVAEPVVTPRAREGLRTVVPTIFPPSTVNRGESVVRVPPEPERKARPVQ  
PVDFFNVPKKRGP KPKLRFVPSAGGCASHESFHRRADERFSLSHAKMGETSAYGLMQLTQQFRSGDVHRHLSRNSLYR  
SSDPADDDDALSP EPLDVEEEAG **ESWSPCLRNMEKVIVTDITSNSLTVTIKESSTD** KGFFREKR

>Mar\_LOC113135962

MEGVTVGQ **VFDAECILSKRPRKGFEYLVKWRGWSSKHNSWEPEENILDPRLLTAFHKREQ** ERELLFQKKG **KRPRGRF**  
**RKILPA** PAATKDSRSSSSSSSSGLSSASSSEDEDHSSKAKTGPRVHPVPQKRPQIMLAKPDPPH **KKKRGKPLHPDI**  
RALRQA KSRASPPRHQALRLPRDEHRPGVKKPLQPASFTYTGLSRTSREEAASASHTSSSSFSQTTTTSKPGSLSCMW  
TSRSLSSSSPSSGSSSHNKGSPSLQSKNSLSELKRSISESGSSRGN GFKVSPLKQGGGSGSLGLHGSFGGQMAVQRS  
PLGQRRQEGVAGQTGVVQHKQNSGLSKPSSSSSPTS RDRANQALSIRALNLQSVSKPLTGSSSLQGNTGS AVAAASRA  
SLRSGIVVKGVGKIDTRTSAGGQRSGLTAGGATEQARLREGKDMSGGGGAGRGNSKLRQEERKHGLSSQNRNLNELS  
TGDSDETSSSEHDIPLFPRDSRPSLGNNATESDTE **TDWRPTRNLLHVFVTDVTANFITVTVKESPTS** VGFFNSRN  
H

>Mar\_LOC113141452



SMGSGRSAQPASFSLNKSSQSRNFFSMNSGTSLDLKAASKSKGVAAMNLNLSRHPIQGTTAHTQSSSSSGQKKPQGP  
VSALQQMPHTKAVSSLASKTASSNHGSNLQPLNLQNKLAESNDAGNGTATVSGLRNAASPARKTTVTQNQEYNPNP  
VTPGKSQVRKSQSGADKVKEAAEIQTSSVQARLEKSSVHTTEARSQQERSASKDGKAKMNDISTGEEDSSSDSDQDS  
SYNRQNCSSVSQNQDWKPTRSLIEHVFTDVTANLVTVTVKESPTSVGFFSIRNY

>Mal\_LOC109969680

MEGVTVGQVFDAECILSKRARKGKFEYLVKWRGWSSKHNSWEPEENILDPRLLAFAHKREQERELLFQKKGKRPRGRF  
RKIQPAPTTTKDSRSSSSSSSSGLSSSSASSSEDEDHTKKPKPGPRVHPVPQKRPQIILLAKPDPPHKKKHGRKPLHPDL  
RALRQVKSRPSPPPRRHQALRPDRDEPRPGVKKPLQPASFTYTGLSRTSRDEAASSQTSTSSFSQTASSKPGSLSCIW  
TNRSLSTSSPSSGSSFSHSHKANPSPQSKNSVSELKRSISESGSSRGNGFKVSPPKPGGSGSLSLHSSFRGGQMAVQR  
SPLGQRRQDGVGGQTGLVQHKQNSGLSKSLSSSSPTPRDRASQALSLRALNLQSVSKPLASSSLGNNPSSSVAAAS  
RSSLRNSSSIVVKGGMASIKETRTPAGGQSRGLATGGTTEQGRSREDRGKEMLAGGSSGRGNGNGRQDERKHGLSCQN  
RSLNELSTGDSDETSSSESEHDAALYPNNSRPSFGNNATESDTETDWRPTRNLLEHVFTDVTANFITVTVKESPTSV  
GFFNSRNH

>Mal\_Cbx4 (Gene ID: 109957911)

MELPAAGEHVFAVESIEKKRSRKRGRVEYLVKWRGWSPKYNTWEPEENILDPRLLVAFQDRERQEQLMGYRKRGPKPRH  
LLVQVPSFARRSSILADLHEESLDEESCQKTNPQMLRPQAQQYQLNSKKHHQYQPLCREREAEQQTNGKKFFYYQLNS  
KKHHHYQPNLKVPEPVFAKPREVKAPELSSKGYNLPPVLQQKWVRDKDSGCLTKVKDITMELKKLPADLNGHKEPEKV  
KPKEDASQSNVSSSKLKIVKNKNKNGRIVIVMSKYMENGMQAAKIKSGDSETAEKPQGGGNSVENHLEKMKLVKK  
LGLMNGFAKIPKDPQAVLNSGLNGDCPREMEQSPKMELTAREQDKHFEVRGQRQLPADQPLQLTTKPNVLSSPSDREG  
PSALDKRGNQGGVQGLKRHSDTDSKDHGTNKKFLSCRNIAPNPVSSPAQSTSIDQNRHQHTGLQDCGYVDQEEPI  
DLSIVKSKPKAATSTASQFETHIQAEHTQAPILAQPETHQTQNEAQLDQTETQRPETETSKPAEGNTESSNNEKKREG  
TFPSFQPFGLGNIITDITTNCLTVTFKEYVTV

>Mal\_LOC109969469

MELPAAGEHVFAVEGIEKKRIRKKGKIEYLVKWRGWSPKYNTWEPEENILDPRLLLAFQHRERQEQLMGYRKRGPKPKH  
LLLQVPSFARRSSIPASLEEISQDAEGSLKSDPIQVQRSQPQQYQLNSKKHHQYQPSNQEV PADQLINGKKKFIYQLN  
SKHHHHYEPDPNMYDPQASRLKEVVKVQEPASKPANPGWNLPLALQQKWIRDKDTGCLSKVKELAVEVRKPAVKEAES  
EHALKPNPKDASLPSAISSKMKIKNKNKNGRIVIVMSKYMDSNKVHGAKGKHGESSREKPKQNTKPSENNPAHRTKM  
VEHPENGIPKEICNGSPLPAAEHPKICSPKDRHFSKPSPTAEYNTAEVARGADLPDDLPLQLTASSPPASWAVDNN  
ILTPTALDQIRIPSFPSDRKRKLSNPVENMNVSKVFLTSRSISVPGTVVMPPQDKPMDLHCSSRRHSSASTHEVMDSG  
SQEPMDLSCPKTKKLVEPEVQPELEAKPEPAVKDTPPVSEDTQKSAEKSKEAPVKKISPFMGNIITDITTNSLTVT  
FKEYVSF

>Mal\_Cbx6 (Gene ID: 109951608)

MENSAGGDRIFAAEAILKRRVRKGRIEYLVKWKGWAMKHSTWEPEENILDDRILGFEQKERERELHGPKKRGPKPKN  
FVMKARSQKGETSSRASNSRQNTPRSSSSSTSSRAAPSSASPHHLPSSLSSSSSTVAPSPKLNLSLAATHKLKDDIHRCH  
RMSRRPLPRSDPMAPTFSNPSGFPSPRMHVSPFSETVRILNRRVKPREVKRGRIILNLKVIDKPGRGGAASSRNITAG  
RQNIPSRNRIIGKKGEAPYRPFQPLKMLGFPYMGKPFGLQCGGPVPFHSQPGSCSSTGAKDSHTTSPSYQSPSPSS  
SSGSEKSPSTTSAKSQPTNRTSPSSEGPKPSKPHETETQKGPSAKPSAPAPSSDADPVASASPFPLPSSPSSCLEDEE  
EEGAVDSSAPTEGSRKSLRQRRAKRQVPTTLPSVTPGDQRPSPTEPKRVPAEGDPDWHPEMAPSCKDVVVTDVTTNLV  
TVT

>Mal\_LOC109952690

MELSAIGEQVFAVESIVKKRVRKGNVEYLLKWKGWPPKYSTWEPEEHILDRRLVQAYEEKEQRDRALGHRKRGSKAKR  
LLQNQTVYTMDLRSAHKPPEKPPHRLSMTRSLVPEDEDEDEDEPYSSCRQGPQPQMTHLRSKRRSQRCFDSNPP  
SPGQEDWEGRGEEEEEEVEDNGDEEEEMEVAQKDTAEKSVGIPNGQKRTDKWSSTIIPDEVTAASEKPDNMWRPIFSPG  
EVTVTDITLNSLTVTFRESRVAKGFFRGWGLEV

>Mal\_LOC109952654

MELSSIGDQVFAVESITKKRVRKGNVEYLLKWKGWPPKYSTWEPEDNILDPRVLVAYEENQEKIRALAYRKKGLRPRR  
LVLARNIFAMDLRSAHKVAEKPSRLRLSLTRAMSTDVDQGERGSMYRRFPVRRKSKQRVAKQRSDRCLNKP IHTLIKKE  
EPMEDDWSGTSEEEKQSESTEERHEDSLYGQSECSPPLLERQDLEMEVEEKVDANLTAAGTETWTEGLGADTRQNO  
EFACNQSENSASVPVAGPGDAVILHNKSDGDTGEEGVKSGSECPKSERNNNTTSVIVRVNRSSETVGTAAATVLSTAEA  
RSDNQSFSTTTAPGSQTIAAEDPGKIVIVTEVTNLSTVTFKEATVAEGFFKDY

>Mal\_Cbx8 (Gene ID: 109958030)

MELSAVGERVFAAESIIKKRIRKGRIEYLVKWKGWSPKYSTWEPEENILDSRLFAAFEQREERELYGPKKRGPKPKT  
FLLRQAQAKVKEKAYEFERSEAVRGMHITYPAPEPVVTPRAREGLRAVVPTIFPPSTVNRGESIHVRPLELGTREHQQPS  
LQQSSPEGLIHIPKKRGPKPKPRFSPAVSEAHKRAAEQVSHGPHKLAKLQGGEDMRLVEVAHRHPENHSHKHHHHHH  
THNRELSSGSSYKQLYSDRSLHLHRTCTDIQRTKDGSTYLAPAHFTHQSKMSQSLNHPAALPQMEKPYFLDRPSPTRL  
DDNLDEVTRPSLGNVEKVLVTDVTTNFVTVTIKESSTS

Mal\_LOC109969470

MELSAVGESVFAAESIIKKRIRRGWEYLVKWKGWSPKYSTWEPEENILDARLFAAFEERERERELFGPKKRGPKPKET  
FLKAKAKEKSYEFREASRGIQVSYPIPEPVITPRAREGLRTVVPTIFPPSAVNREGESVQVRPPEPERPRPTPPAA  
LTLQESTRFPRKRGRPKLHLHYDKADGSSSAEPDTKRSRLLEYPMSHGLSKMSRRLHHHGETSDHSLQLTKRFQEK

TSITPKSCGEHRHVGGVGLSYTCAFS PGVRKRDQEGRRTNCLSRMFVPQPSKPKHSAEHRSSQMTRCSLPPREPPHVL  
AQSEFIHDSSETPA SSWKPTFTNLDTVTVDVTMNFVTVTIRESSTDKGFFRDKR

>Ate\_LOC113156830

MEGVTVGQ VFDAECILSKRPRKGFEYLVKWRGWSSSKHNSWEPEENILDPRLLA AFHKREQERELLFQKKG KRPRGR  
RKILPFVPTATKDSHSSSSGLSSSSASSSSSEDEEHTKAKPGPRVHPVPQKRPQIMLAKPDHPR KKKRGRKPLHPDLR  
AKSRPPLPPPPQRHPQPLRTPRDEPRPGVKKPLQPASFTYTGLSRASRDEAASASQTSTSSFSQTAASKPGSLSCVWM  
NRSLSTSSPSSGSSSHIKTSPSTQSKNSLSELKRSISESGSSRGNGFKVSPLKQGGSSGSLGLHSSFSGGQTSVHRSP  
LAQRRQEGVGGHIGLVQHKKQNSGLSKPSSSSSSSPTPRDQANQALSRLALNLQSVSKPSAGSSSLQGNNTGSAVARSSL  
RSGSGIVIKGGVGGISRTSAGGQRTGVAAGNAAEQGLRDDRKGEMLAGSSSGRGNGSGRQEERKHGLSSQNRSLNEL  
STGDSDETSSSESEPDASLYPHNSRPSLGNNATESDTE TDWRPARSLLEHVFTDVTANFIVTVKESPTS VGFFNSR  
NH

>Ate\_LOC113158311

MEELSAVGEQ VFDAECILNKRLRKGLLEFLVKWRGWSSSKHNSWEPEENILDPRLLA AFNKKEQEKELLMRKRGKPRPG  
RPRKILDNVPEVSKSSSSSSSSSSSDSDSTSSSSSSSSSSDDDDDDSNIKQANPSVTRDLHPVPQKKAQIVMAKQE  
PPKKRSKKPLPPEVKELQONKGLRKVLKTSKETDLPGAIKKPVHPASFTFMGFHRSSAKDVTGGQNRSFLSQGGAVGS  
SRSVQPASLGLNKPSQNRNVTEGKISVNTSSGASLDLKAASKSGVAALNLNTSKHHIQGTTQHTLSSPNGQKKPQ  
APVSTLQRIPISTKALASLPSKNTSSNHGLGLQPLNLQNKSVQSSNTSGSGTTPSSGAKKTAVTQNTQYENPKSPTIPG  
KPQIRKNQAGADKMKEATEIQTSRVQDRLEKSRVHKSTDIQSQQERLAPKDGSKSKMNDMSTGEESSSDSDQDFS  
YNEQDASVAVQN QDWKPTRSLIEHVFTDVTANLVTVTVKESPTS VGFFSIRNY

>Ate\_Cbx4 (Gene ID: 113162586)

MELPAAGEH VFAVESIEKKRSRKGRVEYLVKWRGWSPKYNTWEPEENILDPRLLD AFQDRERQEQLMGYRKRGPKPKH  
LLVQVPSFARRSSILADLHEASLDQDSCQKTNPIQMLRPQTQQYQLNSKKHHQYQPLCREREAEQQNGKKFYQLNS  
KKHHHYQPDLLKVHEPLFAKPREVKATELSNKGYNLPVLQKQWVRDKESGCLTKVKDITMELKKLPADLNGHKEPEKV  
NPKEDAS PQSNGVSSSKLKIVKNKNKNGRIVIVMSKYMDNGMQAAKVKNGSDTAKEVQQGAENSTENHLEKMKLVKK  
LGLMNGFAKNYPRDKPATPSSGLNGDCSKEQERSPRMEPTVTEQNKHVEVRGQGQLAAQPLQLTTKPNLLSLPLDRG  
VSSADKRGNGSGFQGLKRHLTDTEEHGSSKRFLSCTSVANSISSATQSI SNDQNGHQSRAPLQDCGYADQEEPIDLS  
IVKSRAPGASAAEPETSTQTATHGQAQILTQAETHTQSKTQTDQATETETQAQTETHESAEEEKVDSVGSVSNSEK  
KKEE TFPSFQPFGLNIIITDITANCLTVTFKEYVTA

>Ate\_LOC113155158

MELPAAGEH VFAVEGIEKKRIRKKGIEYLVKWRGWSPKYNTWEPEENILDPRLLV AFQHRERQEQLMGYRKRGPKPKH  
LLLQVPSFARRSSIPAGFEETRQDTEGCLKSDPIQVQRSQPQQYQLNSKKHHQYQPNSEQEVPADPLTNGKKKFYQLN  
SKHHHHYEPDLMSYDAQASRLKEVVKVQEPACKTANPGWNLPLALQKQWVRDKDTGCLSKVKESALEVRKPANKDTES  
EQALKPSPKDVTLSGTVSSKMKI IKKNKNGRIVIVMSKYMDSNVHGTGKGKHGESNEEKLSIQASENNPAHRTKMV  
EHPENGIPKEMCNGSSLPAAEHPIKCSPKDRHFSKPSPTAEYNTAVARGQADLPDDLPLQLTASSPPTSVAVDTSI  
PTPTAVDQIRIPSPFSDRKRRLSDPVEDRKVSKTLSSRSFSVPSTVATPPQDKPMDLHCSGRHLSSTCTYEIMDSGS  
QEEPMDLSCPKTKKQVEPEIQPELEEREPEPAIKDTPPLPMTENTQKSTEKSTEA PVNKISPFMGNIITDITNSLTV  
TFKEYVSF

>Ate\_cbx6a (ENSATEG00000003501)

MEQSAAGDR IFAAEAILKRRVRKGRIEYLVKWKGWAMKHSTWEPEENILDDRIL LGFEQKERQRELHGPKKRGPKPKN  
FVIKARAQORGETSSRASNTRQNAPRASPTSSRAAPSPSASPHQLPSMSSSTVAPSPKLNLSLAATHKLKDIHRCHRM  
SRRPLRSDPMAPTFSNAGGFPSRMHVSPFSETVRI LNRRVKPREVKRGRIILNLKVIDKPGRGGTAAGSRNITAGRQ  
NIPSRNRI IGKKGEAPYRPFQPLKMLGFPMYGKPFGLQCRGPVPFHSHPGSCSSTGTRNSLTSSQYQSPSPSSSS  
GSEKGSPTATSAAQSQPTTGATPSSEAPKSSKPHTDTQKGQSTKQSAPAPSTDANPTALASPFPLPSSPSSSLEDEDEE  
GAAERLAPTEGGRKNSRQRRAKRQVPATLPLVAAGVQISATTEPQRVPAEGD PDWHPEMAPSCKDVVTVDTTNLTVT  
TIKEFPSPASCSPSPASPENASSPPATTSDDPSPAKP

>Ate\_Cbx7 (Gene ID: 113155821)

MELSAIGEQ VFAVESIVKKRVRKGNVEYLLKWKGWPPKYSTWEPEEHILDRRLVQAYEEKEERVRALGHRRKRGPKSKR  
LLLQNTVYTMDLRS AHKTPEKPPPQLHLSLTRSLVPEDEDEAYSDCGQDAQPMAYCKSKSRKSHFRCLDSNPPSPTE  
EDWEGRGEEEEEDVDVEEDMEEEEETVVAQKETTEKSVGIFNGQERTDKWSSAVGPDEIIASEMTD NVWRPIIGPGE  
VTVTDITLNSLTVTFKESRVA KGFFRGWGLEV

>Ate\_LOC113152693

MELSSIGDQ VFAVESITKKRVRKGNVEYLLKWKGWPPKYSTWEPEDNILD PCLVLAYEENQEKIRALAYRRKGLRPRR  
LVLNRNVFAMDLRS AHKATEKPPRLRLSLTRSMSTDVDQGERSMYRRPVQRRSRQRMMAKRGSLIKPIRPLRKKEEPL  
EEDWSVTSEEEKQESSTTEERREDSVYGQSECSPPLLERQDLEMEVEVEEKADTDLTAVGTMEWIDRPGGGTSETR  
QNQTAFACDIKDSALARVAGPGDAVTVGDGSDLDLRDDEGVKSGSECPVERN NATSVIVRVQRSSEAGDAAVDCSAV  
EARSEEVKGDNQ SETTTTAEHPGKVIIVTDVTINSLTVTFKEAMMA EGFFKGY

>Ate\_Cbx8 (Gene ID: 113162656)

MELSAVGER VFAAESIIKRRIRKGRIEYLVKWKGWSPKYSTWEPEENILDSRL FVAFEQKERERELYGPKKRGPKPKT  
FLLKAQAKVKGSYEFERSEAARGIHITYPTPEPIVTPRAREGLRAVPTIFFPSTVNRGESVRVRSPEHSIRDHQQPS



```
>Ate LOC113155165
```

>Bsp LOC114845447

>Bsp LOC114861130

```
>Bsp Cbx4 (Gene ID: 114846950)
```

>Bsp LOC114860475

```
>Bsp Cbx6 (Gene ID: 114870514)
```

```
>Bsp LOC114846206
```

>Bsp LOC114860262

MLFSSIGDQVFAVESITKKRVKGNVEYLLKWQGWPKYSTWEPEDNILDPRVLVAYEEHQEKIRALAYRRKGLRPRS  
LVLRNVFAMDLRSAHKMAEKPPPLRLSLTRSMSTDVDQGEHAMYRRPGRRIRHRAGGKRGPSIKHVRPLRTREKPM  
EEDWSGTSEEEKHECESAEERREDSVYGRSECSSPPLLERODLELEVEEQADVELTAAAPWSDRPGGAAPTOTLACDP

TMDSVSARVAGPGDAVAPGDAPAPHSGEESGPGPRSERNNNTASVIVRVQRSGETAGGDNQG VTTATAEHPGKVI VTD  
VTINSLTVTFKEAMTA EGGFFKGH

>Bsp\_LOC114860488

MELSAVGES VFAAEESTIKRRIRRGWEYL VKWKGW SQYSTWEPEENILDARLFAAFEERERERELFGPKKRGPKPET  
FLLKAKAKEKTYDFRRETFRGISYPVEPVITPRAREGLRAVVPTIFPPSAVNRGESVHVRPPEPERPRPALSLQEP  
SRFPKKRGRKPKLSLNYDRDDGPSSAEPDTKRSRLLEFPVPHGPSKMPRLHHYGETSDRS LIQLTRRFQEETTITPK  
SCVGSASLSFSCAFSPDQGVHRTHCVSRASLARSSKNRNHRETEGRLTREQPGAVCAQPESTD GSWTPSFTSLDRVTV  
TDVTMNF LTVTIKESSTDKGFFRDKR

>Bsp\_LOC114847134

MELSAVGER VFAAEESTIKRRIRKGRIEYL VKWKGW SPKYSTWEPEENILDSRLFAAFEQKERERELYGPKKRGPKPKT  
FLLKAQAKVKGKAYEFRSEAARGMRVTYPSPEPVVTPRAREGLRAVVPTIFPPSTVNRGESVRVPATELATCEIRQPS  
LRQTCPGSLMQVPKKRGPKPKPRFGSTASEPHKRRDEEQLSHSPHTLATLQGVEDVTLVKFAQRHPEDHSHCHKHHHH  
HRHQHHHTLSQGLSGGSSYKQLYLDHSPRPHRMDVNIHMAKDGS SHLAPAHFKHQMEKPYFLDRPSPTRFDDDADEV  
TWRPSLGNVEKILVTDVTTNFLT VTIKESSTA KGGFFKDKR

>Gwi\_LOC114481946

MEAVTVGQ VFDAECILSKRPRKGKLEYL VKWKGWSSKHNSWEPEENILDPRLLA AFNKREQERELLLQKKGKRPGRGP  
RKILPPTPAVAEEGHSSSSSSMCSDSLFSSSDEDDQVKLLPQKRPQMLPAKLEPPRQKKKKRGRKPLALPSSSPPPQQ  
RPPHRKPLQPASFTTGLSRPGSLALWVRGSDGAPYRHSSFSRSQSFHHKQPNKASASPRERNQALNLRALNLQSV  
TKPSSSYPVSTSNYPVTSAAKYPGSAGRPSTVQRSVLPAGGISGPRTAVRSEDGKAVLNELSTGSDSDSTSESELG  
RASFPSSNNR PALRDEDETE TDRPATTLV DHVFVTDVTANFITVTVKESPTS VGFFHSRNH

>Gwi\_LOC114469338

MELPAAGER VFAVESIEKKRSRKGVEYL VKWKGWSPRYNTWEPEENILDPRLLD AFQDRERQEHLMGYKRGPKPKH  
LLVQVPFSFARRSSILTDLDEATLKGD LQKPPSLQTL LPOAQQYTLNSKKLHQLQPLGREAEQQANTKKFYQLNSKKH  
HHYQPDHKAREAAFAKPREVNKGYNLPV LQKQWVRDKDSGCLTKVKDITMELKKLPADLNGHKEPEKVPTKEATLPQ  
SNGVRSEKLKIVKNKNKNGRIVIVMSKYMENGMKT VKIKNVDCENAEKLPHGADSVSENHLQKMKLVKELGLMNGFAK  
HHKDRATVLTSTGFNNTDCSTEKKVLT PKTDLAVTKQDKHAEVKGQQLPADQPFHLTKPNLSPSPSGGAASPEDNT  
GGEGRTOGLKRHVSGADGEEHLATKRFLSSSISGSNATSSPSQNI SGQNELQCGCFMEQDEPIDLSMVKSRPETQRD  
ALTDTPQPKPSDVNKEDSVSCKEKRQTGT FPNFQPF LGNIIITDITTNCLTVTFKEYVTA

>Gwi\_LOC114468810

MELPAAGEH VFAVEGIEKKRIRKGI EYL VKWKGWSPKYNTWEPEENILDPRLLV AFQHRERQEOMLG YHKRGPKPKH  
LLLQVPFSFARRSTIPTNIEETSQGPEDNQADPNQVQCSQPQQYQLNSKKHHQYQPSNQEV PADQLTNCKKKFIYQLN  
SKKHHHYEPDPHMYDQASRLKKLVKQEGASKPTNPGWNLP LALQKQWVRDKDTGCLSKVKELAVEARKPAVQEADS  
EHALKPNPKDATLPSA ISSMKMIKNKNKNGRIVIVMSKYMDVNKVHG IKGKHGESSREEKPHNTKPSENNPAHRTKP  
AEHPENGIPKESCSNGSPLSAAEHPSKCSPKDRHFSKPS PSTAAEYNT EVARGQADLPDDLPLQLTARSPSWTVD TNIP  
TPTAADQLRIPSPFSDRKRKLLDTEVDRSAAKVHLTSRNF SVPTVVT PPDQKPMDLQLSASRHSNKCTYEIMGSQDE  
PMDLSCP KAKRQVEAELQLEVPVQPELETEPEPEPEPEAPEPDKDTPPVTTETETVKPTEEAKQA PVQKLSPFMGNIIT  
TDITTNCLTVTFKEYVSD

>Gwi\_Cbx6 (Gene ID: 114466377)

MELSAAGDR IFAAEAILKRRVRKGRLEYL VKWKGWAMKHSTWEPEENILDDRIL LGFEQKERERELHGPKKRGPKPKK  
MLMKASSQPTASSSSAVPHHFPSTSSSSSPVGLLPKLNSLAATHKLK KDIHRCHRMSRRPLPRCDPTASSFSNPGGFP  
SRMHVSPFSETVRIVNRRVKPREVKRSRIILNLKVIEKSGRGGGSASRSRNVQSGRHNI PSRNRIIGKKGEAPYRPFQ  
PPLKMLGFPMYGPFGFLQCGGALPSHANATASRAPPATQDQDRSDRSEEGKDVPPPSTPPPAPSEEQTAPPAGAQR  
VPAEGD PDWHPQRAPSCKD VVVTDVTTNLLTVTIKEFPSPAPASGPASPSASPDHGSAPDDASVAKP

>Gwi\_LOC114459779

MELSAAGDR IFAAEAILKRRVRKGRLEYL VKWKGWAMKHSTWEPEENILDDRIL LGFEQKERERELHGPKKRGPKPKK  
MLMKKGESSSSGRALNSRLKTSRSSSSSSSSSSQPTASSSSAVPHHFPSTSSSSSPVGLLPKLNSLAATHKLK KDIHR  
CHRMSRRPLPRCDPTASSFSNPGGFP SRMHVSPFSETVRIVNRRVKPREVKRSRIILNLKVIEKSGRGGGSASRSRNV  
QSGRHNI PSRNRIIGKKGEAPYRPFQPPLKMLGFPMYGPFGFLQCGGALPSHANATASRAPPATQDQDRSDRSEEGG  
KDVPPPSTPPPAPSEEQTAPPAGAQRVPAEGD PDWHPQRAPSCKD VVVTDVTTNLLTVTIKEFPSPAPASGPASPSAS  
PDHGSAPDDASVAKP

>Gwi\_LOC114467897

MELSSIGDQ VFAVESITKKRVRKGNVEYLL KWQGWSPKYSTWEPEDNILD PRLVLAYEENQEKNRALAYRKKGLRPRR  
LLLRLNLFAMDLRSAHKGTEKPPRLRLSLTRSMSTDVDQTD RRRVYRAVRRRSQQRVSRRGSERESNKA FHRQRKKV  
EDEEWESTSEDDKCESTEERCADSVYQQSECSSPPVLERQDLEVEVEGKVENDITAVSTWADGVGGATFQTGHDET F  
EKSQDSVQPEYSVAGGDREGGNEGVCQSVCSVVEARGDN QSVTTTTKDGPGKVIMTDVTTINSLTVTFKEASVAEGFF  
KGC

>Gwi\_LOC114481622

MELSAIGEQ VFAVESVVRKVRKGNVEYLL KWKGWPPKYSTWEPEEHI LDKRLVQAYEEKQREQAVGHKRRKRSRKR  
FSLQNPEYSMALRSARHPPEKAAPRLRLSLMRSLSSDQQE EFPDVCGRSQQAVADQRSKDRSSLFRCFDSNPSSPALK



AGGPASSGRSPVQTASLSLNRSGHNRSLSDGRQAASGASLDLKTAAAGKSKGVAALNLNTSKPPGQGTALSPSPSGQRK  
PPAPLSTLPRIPHPKPAASVPSKNPPSGPGPGLQPLNLQSKLAQSGGAPRTAAKKTVPVSNQERSAPKTPPTPQRLAV  
RKPQTPADRVQTARVPGRLEKTCGEVQNPERTGSKEGKKARMNDMSTGEDESSSDSDQDSSYPGRPPVQN **QDWKPTRS**  
**LIEHVFVTDVTANLVTVTVKESPTS**VGFFSLRH

>Sfa\_LOC115385547

MEELSAVGEQ**VFDAECILNKRLRKGLFLVKWRGWSSKHNSWEPQENILDPRLLAFFNKKEQ**EKELLMRKKG**KRPRG**  
**RPRKVLEN**VPEVSKSSSSSSGSSSSSSSDSSSSSSSSSEDEDEEDGGGETPGTAGRTRELHPVPQKKAQIVVAKQSP  
PRKRGRKPPPADAKDFPFSKGARKVPKTARDDPLPGAIAKKPVHPASFTFMGFHRGASREAAAGPARGPLTPGGAANKP  
AGGPASSGRSPVQTASLSLNRSGHNRSVSDGRQAASGASLDLKTAAAGKSKGVAALNLNTSKPPGQGTALSPSPSGQRK  
PPAPLSTLPRIPHPKPAASVPSKNPPSGPGPGLQPLNLQSKLAQSGGALRTAAKKTVPVSNQERSAPKTPPTPQRLAV  
RKPQTPADRVQTARVPGRLEKTCGEVQNPERTGSKEGKKARMNDMSTGEDESSSDSDQDSSYPGRPPVQN **QDWKPTRS**  
**LIEHVFVTDVTANLVTVTVKESPTS**VGFFSLRH

>Sfa\_Cbx4 (Gene ID: 115390982)

MELPAAGEH**VFAVESIEKKRSRKGRVEYLVKWRGWSPRYNTWEPEENILDPRLLDADFQDRER**QEQLMGFRKRGPKPKH  
VLVQVPSFARRSSILADLREDEDGRHKPASIQMLRPQAPQYTLNSKKHHQYFQPLCREAEQQANGKKFYQLHKKH  
HHFQPELKAHEPRFAKPRDAKAPAAAEKGYNLPAVLQQKWVRDKDSGCLTKVRDITMELKKLPADLNGRQEPEPARTK  
DAALSRANGVSSGKLKIVKNKNKNGRIVIVMSKYMENGMTAKVKAGGCEAVSLPPGADGDSEHLEKMKLVKKLGLM  
NGFAKSLKDKPGAPGGGLNGDGPTEQSPRTEPAVTEKDKLGGVEGQAQNPTRQPLLLTARCPLLSPPLERAVPPPT  
DPTGSPGGSEGLKRLSEPGAEEHGAKRFFSCRISAPNAASSPVQGVADQNGRRDVSQGVSEPEPENCDFPDQDE  
PMDLSMVKSRAAAPETHTRSDTQAQAE TLKPAEGDRDASPLPVSHKEKTKE **DRFPAFQPFGLNILITDITNCLT**  
**VT****FKEYVTA**

>Sfa\_LOC115386984

MELPAAGEH**VFAVEGIEKKRIRKGIYLVKWRGWSPKYNTWEPEENILDPRLLVAFQHRER**QEQQMGYRKGPKPKH  
LLLQVPSFARRSSIPASLEEASQDTSVKS DPIQVPRSQPQQYQLNSKKHHQYQPSQEV PADQLTNSKKKFIYQLN  
SKKHHHYEPDPNMYDAQASRLKEVVKVQEPASKLSNPGWNLPLALQQKWVRDKDTGCLSKVKELAVEVRKPAVKEAES  
EHALKPNPKDATLPSAISSMKKIIKNKNKNGRIVIVMSKYMDSNKHVHAGKKGHGESSREEKPNAKPSENPAQRTKM  
AEHPENGIPKEICSGSTLTAAEHPIKCSPKDRHFSKPSPTAEYNTYEVARGQADLPDDLPLQLTASSPSWTTDTNIP  
TPTAVDQIRIPSPFGDRKRKLSEPVEDRSVAKVYLTSTRLSAPEPVTPQDKPMDLHCSGPRHSSICTYEALGSQEE  
PMDLSCPRAKKQVEAELQPEPEPAPAVTETTPATETNTQKPAGESKK**QPVKKISPFMGNIITDITNLSLTVTFKEYV**  
**TF**

>Sfa\_Cbx6 (Gene ID: 115389716)

MELSAAGDR**IFAAEAILKRRVRKGLYLVKWKGWAMKHSTWEPEENILDDRILGLFEQKER**DREIHGPKKRGPKPKH  
LFVKARAKKETSNRASSRSQASRSSSAASTRAAPPSSSSSAAPQVPVSSSSPSAVSLTPKLNSLAATHKLKDIHRC  
HRMSRRPLPRSDPMASFTFPNAGGFPSRMHVSFSETVRIVNRVKPREVKRSRIILNLKVIDKPGRASTSASNRNVPP  
GRQNI PSNRNRIIGKKGEAPYRPFQPP LKMLGFPMYKGFGLQCGGPMFPQYPVSCSSRGARDGRTTSSQLPSPPPPS  
CSGGSEGTSLTSASAAQSQPTPGAKCSKPAESAKSFAPSPSSNTNQAPESPLNSPSPSSSLGDEEEGPTQDPSPRQN  
STAKLQSPTTLPLVASGDQTAAPVEPQRVPAEGD **PDWHPEMAPSCKDVVVTDTTNLVTVTIKEFPS**ASGPASPSAS  
PDSTMSPPPAATSEDPSPAKP

>Sfa\_LOC115387617

MELSSIGDQ**VFAVESITKKRVRKGNVEYLLKWQGWPPKYSTWEPEENILDPRLVLAYEENQE**KIRALAYRKKGLRPRR  
LVLRNIFAMDLRSANKEAEKPPRLRLSLTRSMSTDVDQVERGGIYRRPLRRRRSRQRATRGPPEGAAGKPIRPQRKK  
VEEPTTEEEDEEEWGTSEEDKHESESTIGERCEDSVYGPSECSSPPLERQDLEIEVEEKVEDELIAARTEIWTDGEC  
GGTSDTGHRVETVACDQSKDSASASEDRAGDEASVGRSDWEGVESREGRLCPRSNA TSVIVSILGNRETAGDGTTTTA  
AGAAVRSSDEAGKEEARGDNQS **VNTAEFGRQIGKVIMTDVTINSLTVTFKEAMVA**EGFFKGY

>Sfa\_LOC115392998

MELSAIGEQ**VFAVESIVKKRVRKGNVEYLLKWQGWPPKYSTWEPEEHILDKRLVQAYEEKEE**RERALGHRRKGSKAKR  
PLQNTVYTMDLRSAPRPEKPAAPRLRLSLTRSLPSEDEDPTFGACRRSLHRKSKQRSQIRCLSSSSSSSTPDDWEGEE  
EEEEEEEDVIEDDEDKEDDGVKETA KTIEGTLNGNRTGDWSAAAGPEEPAAPE **GAWRPPVVGPGQVTVTDVTNLCLT**  
**VTFRESRVA**KGFFRDCEPEV

>Sfa\_Cbx8 (Gene ID: 115390143)

MELSAVGER**VFAAEESTIKRIRKGRLEYLVKWKGWSPKYSTWEPEENILDQRLVFAFEQRRER**ERELYGPKKRGPKPKT  
FLLKAQAKVRAKSYFRSDAVRGMHISYPTPEPVATPRAREGLRAVVPTIFFPSTVNRGESVRVRTPDWSPRESPLRH  
ADPDELPHSPKKRGPKPRARFLDSSEAHRRWAEAPASHGAHKLAKLQGAEDMRKFSHRHPDNYRHHHQHHHTHGRV  
LPKQLYSDRLQPHRTDPDPHRTPDGPGYLAPAHFKHHSRPGPGPGPGPSRPAGLPLMEKPYFLDRSPTRLDDDDP  
E**VTWRPSLGNVEKVLVTDVTSNFLTVTIKESSTS**KGFFFREKR

>Sfa\_LOC115386985

MELSAVGES**VFAAEESTIKRIRRGWEYLVKWKGWSQKYSTWEPEENILDARLFAAFEERER**EREMFGPKKRGPKPET  
FLLKAKAKAKEKTYDFRREAARGMQVSYPIPEPVVTPRAREGLRTVVPTIFFPSAVNRGESIPVRPPEPERRPRLPPP  
ADLMVHDTVHYPKKRGPKPKMLHYDHDKGGSAAFEPAKRSRLLEGQSGHGLSKPSRPVHYHGEPSSDRSLLQLTRRFQ

EETITIPKSRHMGYACAYRPDVHKGVOGGHRTYSVSRMSIPHSSHQAKMYCPPRDQPSASLQSVHEASTQRVSSWRP  
SFANMDTVTVTDVTSNFLTITRESSTDKGFFREKR

>Ola\_Cbx2 (Gene ID: 100125497)

MEELSAVGEQVFDAECILNKRVRKGKLEFLVKWRGWSSKSSHAAFSSIREQEKELMLKRGKRPGRPRKILVRTSRR  
AAPRLSDSDRTNARFFSTIQDSLPEPPKSSSTSSSAMSSSSDSSSSSSSSSEDEDEDEDSHLQQTAPTVRTRDHDP  
VPQKKAQILMAKPDPSKKRRGEAKELQQNKAPPKTDKGPDLPGGPHKPVQPPGFAFLGFHRGSAREAVGAQNRSPLAQ  
GGGVKNAPGSAGPGRSSVQTSPLPNKSGQSRPSAVSSGASLDLKKAKGVAALHLNPSKHPLQGAQHTPGGQRKAHTP  
LSTMQRMLSTKTGTPTPPKNPPSNPGSGPQPLNLHHKLSQSGTAGNAQGAATPAKKAATPAQVHHDDPQRRPAARKS  
QPDKSGSEVQKQPERSKKPRMTEMSTGEESSSDSDHDASFNGAAVQNQDWKPTRSLIEHVFTVDVTANLVTVTVKES  
PTSVGFFSLRNY

>Ola\_LOC101172611

MEGVTVGQVFDAECILSKRSRKGFYELVKWRGWSSKHNSWEPEENILDPRLLAFAHKREQERELLFQKKGRPRGRPR  
RKILPPLTPDKDSRSSSSGLSSPRSSSSSEDEEHTKAKPSPVPQKRPHIMLAKADPPHKKKRGRKPLPPDLKAL  
RQVKNRPSPPPPPPPPPPRRHQPIRLPREDTRPGIKKPLQPASFTYLSRTSREEAAAPSLAFSQAASKVGSISMWVG  
RSLSASSPSSSKTSLSQNSYLKRSFSESGGGSRADGLKMSAVKPGGTSSSPGAHGSFSGGQVGIQSPAPGQKRPEGQ  
AAKTGVVQHKQONPVLSKPSSSSPFLRDRASQALNLRALNLQSVGKTYAGGAHGSTDFRSGTAKGGPRSGLSAGGGAE  
RGRDREPAIRRDGALDRNRQSRGSDRGLNELSTGDSDSEVSSESERGAALFPDKIRPSLGASATDSDTE  
CLLEHVSVDVTANFIVTVVKESPTSVGFFNSRNN

>Ola\_cbx4 (Gene ID: 101158167)

MELPAAGEHVFAVESIEKKRSRKGRVEYLVKWRGWSPRYNTWEPEENILDPRLLDFAQDRERQEQLMGYRKRGPKPKH  
LLLQVPSFARRSNVLADLQEAILEDGRQKSGPIQTLPLQAQQQYQLNSKKHHQYQPLCREAEQQTNGKKFFYYQLNSK  
KHHHYQPDLLKIHVPFAKPLEVKAPELASKGYNLPPVLQQKWVRDKDSGCLTKVKDITMELKKLPADNLGLKGS DKVK  
TKEESSANGGKLIKVNKNKNGRIVIVMSKYMENGMQTAIKNGDCEGAGKPAEGLEGGMEKHLEKMLVKKLGLMN  
GFPKPKDKPIVLCSGFRAESSPKKETSAQIQALALTEQDKHDGVRGQEELPDQDHPQLTGKPNLLSLPLEGRAPSSP  
LDTRGSCQGLKRHLSDADGEEHNPSKRFLSCRTLSTPSAAPSDDRTGAAGVSSLRDCGYAEQEEPIDLRIVKPRPSAA  
AEPPEPQDDSRTEPALPQPLEPAEDKAGSESELESKE  
DAFPSQPFPLGNIITDITANCLTDTVFKEVYTT

>Ola\_LOC101160166

MELPAAGEHVFAVEGIEKKRLRKGIYELVKWRGWSPKYNTWEPEENILDPRLLVAFQHRERQEQLMGYKKRGPKPKH  
LLIQVPSFARRSSIPAGLEETSQEVEITPKSDSTQVQRSQPQQYQLNSKKHHQYQPSQVEVPADPLPNSKKRLIYQLN  
SKKHHHYEPDPHMYDIQASRLKEVVKVQEAATKANPGWNPLPALQKQWVRDKDTGCLNKVKELAVEVRKPAVKESN  
ALKPNPKDAALPTAVSSKMKIKKNKNGRIVIVMGKYMCKVHGAKGKHGESSKEGDSQSTKPPENGSKMVELSGSGL  
CDSSSVSAAEHLMKCSPKDRHFSKPSPTAAEYNTAVARGQADLPEDLPQLTASSPPTSWTVDNTNIPPTAVDQIRI  
PSFPSHRKRKLSDPVEDRNVPKTFLTSRSLSPSTVAVPPQDKPMDLHCSGPRPSVCTYDAAGNQEEPMDLSCPKNRS  
ALDAKAQPEPDSEAAVKDTPVTTEETQKSTEKLNDPPKNISPFMGNIITDITNSLTDTVFKEFVSF

>Ola\_cbx6a (ENSORLG00000025101)

MELSAAGDRIFAFAEAILKRRVRKGKLEYLVKWKGWAMKHSTWEPEENILDDRILILGFQKEREREIHGPKKRGPCKPT  
AVMKARPQKGESSSSSRQTTPHPTSSRTPPSSASSPHLLSSSSSSSAAAPSPKLNSLAATHKLKDKDIHRCHMSRRP  
LPRSDPMASYSSAGGFPSRMHVSPPSETVRILNRRVKPREVKRGRIILNLKVIDKPGRGGSASGSKNTAAGRQNI  
PSRNRIIGKKGEAPYRPFQPLKMLGFPYMGKPFGLQCGGPVFPFPHPGSCSSTGTRVSKNASSRYQSPSPSSSSSGS  
KSPTGVTAQAQSQPATEDVPPSKDSTPAEGTQPAPASSSDPNPAASAATFLPSSPSSSLDEEQGAEDRSVP EEGKKD  
PCQRRAKQPPPSAAPSIPAGDQTSPLTDFPRVPTEGD  
TDWHPEMAPSCKDVVVTDVTNLTVTIKEFPTFASGPASP  
SASPQNASSPPHVTSSSEEPSATKP

>Ola\_LOC101163772

MELSAIGEQVFAVESILKRRVRKGNVEYLLKWKGWPPKYSTWEPEEHILDRRLVLAYEKEEREQALKGLKAQKLFLO  
DGVYTMDLRSAHKGPEKAPPPLQFSVASCLESEDEDSNSDCRSRRPLAHRECKQRMSQRRYFDSSSSSPAQEDWNE  
ESQESVEEEEEEGAANTYKGFLEQRGADGWSSAVTPNAVEA  
SAWRPGVAPGDVTVDVTNLALTDTVFRESGMATG  
FRPAQFACLQPHGSH

>Ola\_LOC101168624

MELSSIGDQVFAVESITKKRVRKGTVEYLLKWKGWPPKYSTWEPEDNILDPRVLVAYEENQEKVRALAYRRKGLRPRR  
LLRSVFPMDLRSAHKMPEKPPRLRLSLTRSTSTDVEQVYRRSVGRNRRLRVSSMGHVRSSSQHKRKMVQVEEDWG  
VTSEDDKPESEGTIEEKCEDSSYGQSECSSPLLMEPPDLMEVEEEAKAPPAESETETWTERPEDANQRQTSVCSQLT  
DVQKSLSAFEAPPEVSEGSDWDFCEKEPECPEEKSGCCERSNATSVIMRVQSGVTPGDAADGEQDKKEAKDDNQSV  
AMT  
TDSVPVPTGKVIQVTVNSLTDTVFTEATEADGFFKGF

>Ola\_Cbx8 (Gene ID: 101157915)

MELSAVGERVFAAESIIKRRIRKGRIEYLVKWKGWSPKYSTWEPEENILDSRLFAAFEQREERERELYGPKKRGPCKPT  
FLLKAHAKDKARSYDFRSEEVGRIHFPTAEPVPTPRAREGLRAVPTIFPPSAVNRGESVCLPSLQQHSSVSLVHTPK  
KRGPCKPRFSDPQLLKRRPEDQASPGSHKFTKIQGGEEASQVSVGHRHSENLGHYKHHHHHHHHHSQSHGGCSGSFHK  
HLHRTNPDTHRTKISSGYLAPAHFKHHSTAAPPAAPPVEKPYFMDRPSPTRLDDDFDEV  
TWRPCLSNVEKVLVTDVT  
SNFLTDTIKESSTSKGFFKEKR

MELSAVGESVFAAESIIKRRIRRGWEYLVKWKGSQKYSTWEPEENILDARLFAAFEEREKERELFGPKKRGPKPET  
FLLKAKAKEKTYEERMESPRGIQVSYVPVEPIVTPRAREGLRTVPTLFPSPSAINRGESVHVFTPEPERRPRPPPPPL  
GAQESLAKFPPKKRGRPKCLHLEKHDESAPEEDQAKRRLLEEMPTVPRRLHHREETSEHTLIQLTKRFQEKTTITPKGS  
SQHRHVGGARLSTYCAFSVDHVRDHDCLSRMQDASLRRAAEERRLRAMDSCALQRQVGVTSRPDHDSAPRSA SCWTF  
SFTNLDSVTVDVTINLLTIVRESSTDKGFFKEER

MEELSAVGEQVFDAECILNRLKKGKLEFLVKWRGWSKHNSEWPQENILDPRLLAAFNKEQEKELLILKKGRPRG  
RPRKILENVPDAQRSSSSSSGSSWSSDSSSSCSDSSSLDDAEDDERMALEPPGVRTRDLHPPQKKAQILVAKPELA  
KWISQPLSLDARELQQCKGPRDGELPGAIAKKPVNPAGFTFMGFHRGIPRDAAAGPTRGSPGPGGSVKHCVRSVQPAPL  
SLSRPVPSPRSLGEGKLPVSGGTDTPDKASAGKSKGVAALNLNTPKHHPAQGTAYHSPSPPTGHKKPPPPGGKVAAALPP  
NNAPAGQCPGPPPLNLQGRRAQSGGVAGGPRSAHPARQTPVLQNQEYNPAKGPAAPGRLQTRKSQPGADKVKEATG  
PTPRVQARLEPSGLATEVPTPLERSEGGKAKMNDMSTGEDESCSDSDQDPPYVVGVRVASQNLNQDWKPTRSLIEH  
VFVTDVTANLVTVTVKESPTSVGFFMRHY

VMEGVTVGQVFDAECILSKRPRKGSEYLVKWRGWSSKHNSWEPEENILDPRLLAAFHKREQERELLFQKKGKRPRGR  
 PRKILVDLLHSSRSRPLQKMAHSKTKPRVHAVPVKRPPMAPPPQPEPPCKKKRGRKPLHPDILLRLLQAKSSQQGLRPP  
 REDPRSAVKKPLQPASFTYTGLSRASREEASSHASSSSFSTSSSKAGSLGCIWTGRSMSPSSYGRTGAPPSSSETGS  
 RGDGHKAPKPGGGSGSSVSHGGISLAAAGTSDVSGRQRDGFPVQHRRENLPREASQALSRLALNLQSVGAARSSARS  
 GAKRGARSQGEQARLREDQKGKNSLTSTLSTQDSESTSSSESERGGAASTPSGDLASGRLLGLGGGGSDGETDWRPAR  
 SLELHVFTDVTANFITVTVKESPTSVGFFNSRNH

MELPAAGEHVFAVEGIEKKRKIRKGKIEYLVKWRGWSPKYNTWEPEENILDPRLLVAFQHRERQEQMLGYRKRGPKP  
 LLLQVPSFARRSCIPAGFEDSSPDTEAVLVSDPTSVQRPPAQYQLNSKKHHQYQPNFQEVVPADQPTNGKKKFIYQL  
 SKKHHHHYEPDPSMYDAQASRLKEVVVKQEPASKPANPGWNPLPALQQKWVRDKDTGCLSKVKELAVEVRKPAVKDAES  
 EHALKANPKDATLPSSVSSKMKI IKNKKNNGRIVIVMSKYMDSNKAHGAQKHSESSSDVKPQNTKPSENNPAHTTKT  
 AEHPENGIPKQLSCGSSSLPAAEHSPKSPKDRHFSKPSSTAEYENTVEVARGADPLDLQLTASSPLTSWSVTD  
 IPTTLVEIRIPSPFNGNDRKRLKSGPAEDRSVSKTYLTSRSFVSPVTVTTPQDKPMDLHCSGRHSSTLYTEAGDGS  
 QEEPMDLSCPKNKNQVDMEIKLAEPEPAVTEPTQVVEDTHKSTEESKEANISPFMGNIITDITNSLTVTFKEFVSF

MELPAAAGEHVFVAVESIEKKRIRKGRFEYLVKWRGWSPKYNTWEPEENILDPRLLDAFQDRERQEQLMGYRKRGPKPKH  
LLVQVPSFARRSSLLAGHHAASLDESDSCQKTGPIQLLRPQSQQYQMNGKKHHQYQPLCRERAEQQQANGKKFYQQLN  
SKKHHYPQPDLDHEAVFVKPRELKASELANKGYNLPPVLQQKWVRDKESGCLTKVKDIAMELKKLPADLNHGQEPER  
VGPKEADAAPQSN GASNGK LKIVKNKNKNGRIVIVMSKYMENGMKAPKVKDGDSESGVEPPRGT DNGTENHLEKMKLVR  
KLGLMNGLAKNSKDKPTVVSSGLNKRCPQEKEPSPKTEPTVLDKQDKHGGVVRGQRQLPADQPLRLATQLDLPSDRGGA  
SPLDKGSGSPGGFQGLKRHLSDSEVHGSCKRSLSSRSTGALNEASSPTKSLGVDHNGPPSHVGPQDCGYADQEEPIDLS  
VVKSRPSAAQPEHTHTQPTARPAEARTQDETDQADARTDAQRETERNEENVDSSSDSHPFLGNIVITDITTNCLTV  
TFKEYITA

MEVSSSTGDRVFAAEAILKRVRKGRLEYLVKWKGWAMKHSTWEPEENILDDRILGFERKEREQEMHGPKKRGPKPKPT  
PTGSAPGRAPPSSLAPPHAASSSASTVAPSPKLNLSLAATHKLKDIHRCHMRSRRLPRSDPMAPSFSTPGGLPSR  
LHASPSETVIRILNRRVKPREVRGRIRILNLKVIDSVTAGRQNIPSRNRIRIGKKGDAPYRFPQPPLKMLGFPMYGKPF  
LQCGGSPASLQPHGPSSTTEERNAGSASAHERRPPTSGAAASPTEAIESQQKPNATPADASWSDDPPLLPSSSSSS  
LPVAPGDQSSALLTDSORPPAEGDPNWHPEMAPSSKDDVVTVDTSNLTLVTIKEFPSDELE

MELSSVGQDVFAVESITKKVRKGNVEYLLKWQGWSPKYSTWEPEDNILDPRLLVLAYEENQEKIRALAYRRKGLRPRR  
LVLRNIFAMDLRSANKVSEKPTPLRLRLSLTRAMSTDVDQGERGSLYRRLARRKIKQRLSKRGQGGPTNKTLPLRKA  
EPIEDDWGTSEEKQSESTTEPIREDLSYGLQGRSECSSPPLLERQDLEMELEEKADMTLTVVGAQTWADRPGGGTS  
ETIQNQMFASDQSEGSVAPEAIPEDVESLAGDGDWDRGVESESGHEGMISGVSQTDNMTSVMVSVESKSETSGDCGA  
TEITKEEARGDNORVTVTTPGDOSSPAAAOHPKNVISTDVTVNCITVTFKEASVAEGFF

MELSAVGESVFAAESIIKRRIRRGKWEYLVLVKWGSQKYSTWEPEENILDARLFAAFEERERERELFGPKKRGRPKPET  
 FLLKARAKEKTYDSRREAPRIQVSYVPPEPVITPRAREGLRAVLPTIFPPSSVNRGESVLIQPPQDRRPRSTPPAP  
 LTLQEDVRFPPKKRGRPKLHLHYDEDEPDAERGRPEEGSSHGVS GASRLLHRGETSDHGLVQLTRRFQEKTTITPK  
 HSGARGHAGLFGYCAFSPPDVHEREHRTTCLPGWSVPRSGSSAEHQHQAADLRLPPEQAAVTSTQSESTRDQSTRPA  
 STWTPRFTSLDTPVTDVTMNFLLTVTRESSTEGKFREKR

MSLSAVGKERVFAAESI IKRRIRKGRIEYLVKWKGWSPKYSTWEPEENILDSRLFAAFEQRERERELYGPKKRGPKPKT  
 FLLKAQAKIKAKSYEFRGDLVRGITYPTPEPVVTPRAREGLRAVVPNIFPASTVNRGESVRVHPPGLSSREYQQPSLQ  
 QTSPGGILRLPKKRGPKPKPRFKDSSCSPAVFESHORRAEEQVSYPHKLAKLOGGEEMRRIKVAHRHAELHDNRGIT



GSSSYKLYSDRILHPHRTDMDTHRTKNRSTYLAPVHFHKHTSKMSQGPSGPAERPPMEKPYFLDRPSPTRLEVLDLDEVT  
WRPSVGNVEKVLVTDVTTNFLTVTIKESSTSQGFFKDKR

>Hco\_Cbx2 (Gene ID: 109527817)

MEELSAVGEQVFDAECILNKRLRKGLLEFLVKWRGWSSSKHNSWEPEENILDPRLLAAFNKKEQEKELLIRKRGKRPRG  
RPRKIPETVLEAAKSNSSSSSGTSSSSSDSSSSSSSSSSSEDEEEQQASPGVRMRDLHPNPVPQKKAQIVVAKQEP  
PKKRGRKSLSKGLRKSLKKDSDLPGAIKKPVHLASFAMGFHRGSAGCPNRSPPTHGGTSRNSLSTVGSARSIPSPV  
PLMKSSPGRNVTEGKVPTRPDSFKPRGMEAFTSNTTKQHLPGSPQRTTNSPSVQKAHVLQRIITNAKAMAAQAAKNIT  
TNQPLNLHNKVTQGNKSSSGSSPGSALRNKTNQNQEQYKTPQSPASPGGTRKSAAGKDLTEIQTYRGKLEKGEVHKSE  
NHLERPACKDGKMTGEDESSSDSDRSDSDAGREPLAVVHNQDWKPTRSLIEHVFTDVTANLVTVTVKESPTS VGFF  
SIRNY

>Hco\_LOC109518595

MEGVTVGQVFDAECILSKRPRKGFYLVKWRGWSSSKHNSWEPEENILDPRLLAAFHKKEQERELLYQTKGKRPRGRF  
RKFFPLHVSPAAKDSRSSSSSFSGASSSVASSSEEDDEAERDRKKAKGAAAGPRLHPAPQRRPQILPAKAEPHRKKRGR  
KPLHANVGALRPAKSRTPPLPSAPSHHQLLPGLFRKYGKVDPRPGIKKPLQPASFTYTGLSRTAREHHTDAQSAVFSQ  
VSAASKGGCVWNRPA PASSPSLSKAGGSPQRKTSHGELKRSMSPGGSGGRGEALKGMPPPLRPAFGGGGPTAAQRLAP  
PPRRQDSHGQYALVQHKRALAKAPSSSSQRPNSQTLGLRAVNQQNVTKTPLAGHQNSGALVRSGAAVRSRSSSGSL  
VVIRDTCVTPTGQRPVLPAGGGAEKARKDATLPAGGGRQVERKSGRGLNDLSTGDSSESSSGEWERDATSYPSDGRPS  
LGDAATESDTETDWRPTRNLLEQVFVTDVTANFITVTVKESPTS VGFFNPRNH

>Hco\_LOC109527525

MELPAAGEHVFAVESIEKKRSRKGRVEYLVKWRGWSPKYNTWEPEENILDPRLLDAFEDRERQEQLMGYRKRGPKPKH  
LLVQVPSFARRSSILAGRHESSLQGDSDCHDTNSVPMLRPQSQQYQLNGKKHHQFQPMRECEQEHANGTKFYQQLNT  
KKHHHYQPGQLMHESVFAKPREVNARELPIKGYNLPPVLQQKWFRDKTSGVLTGVKDI TMELKKLPADLNGHKEQEEA  
KPKDPASVQHNGVSGSKLKIVKNKNKNGRIVIVMSKYMENGMEDAKVTNAESQSAEAFSQGADNAERHLEKMKLVKHL  
GLVNGFAKKPKADSGFTGDSTKESEQPAHTKLAVTEQDQHFVGRGQCLLPAHQPLQLTPKSNLVSSPLDTGVPVFTDK  
NTTQDEFQGLKRHHHTDNDNEEHGSKNRLFISHHTLSSTQSISTDQNDLRGPFSLQHCDYADHDQEEPIDLSVVKSRP  
QVAASAGSQPERHTQDGTQTDQVKEQTESQPAETENIAIVDVTVDSPVTGVHGETGKVETAFPSFQPFGLNIVITDIT  
TNCLTVTTFKEYVTV

>Hco\_LOC109522747

MELPAAGEHVFAVEGIEKKRIRKGIYLVKWRGWSPKYNTWEPEENILDPRLLVAFQYRERQEQLMGYRKRGPKPKH  
LLLQVPSFARRSSIPAGLEDASADDDSPKSDAVPVQRSQPQQYQLNSKKHHQYQPSQVEVPVEQLANSKKKYIYQLN  
SKKHHHYEPDPNMYDAQASKLKKVVKVQEAASKPANPGWNLPLALQQKWVRDKDTGCLSKVKEQAVEGRKAAPKDAES  
EQALKADPKDATLPSSVSGSKMKIKNKNKNGRIVIVMSKYMENGMEDAKVTNAESQSAEAFSQGADNAERHLEKMKLVKHL  
MAENGLPKEICSSSLPAADHPQKCSPKDRHFFKPSPTAEYNTVARGQADLPDDLPLQLTASSPPTSWPADGNIP  
TSTIIHIRIPSPYSSRRKKLAEPADERRVSKTLLATRSGLVSGTVLSPPDQKPMDLHCTGRIIAYDAADRGGGQEEP  
MDLSCPCKTKRQTEPETRAEPAPRPEPQPELDPQPERAPRLEPQTETAAQPEPSPTPAAPVASEDTPQKTKAALAKKI  
SPFMGNIIITDVTNLSLTVTFKEYVSE

>Hco\_Cbx6 (Gene ID: 109511478)

MELSAMGDRVFAAEAILKRRVRKGRLEYLVKWKGWAMKDSWEPEENILDDRILILGFEQKERERERNPKKRGPKPKH  
LVIKPQKGETSSQCTKSQAKSRASRVTPSSSSSVPHTLAPTSPLSSSLAATHKLKKDIHRCHMSRRPLPRSDP  
MASSFPGSGGFPSPRPHASPFSETVRI LNRRVKPREVKRGRIILNLKVIDKPGRSGSTSSGSRSLPGGRQNI PSNRRII  
GKKGEAPYRPFQPLKMLGFPYMGKPFGLQCGGPLAFHPQTGSCNGRNRTPSDTPASTQSVQSKTPAESPNIA PS  
APANPAASLTLP TGEDAGDAPGASLPQGGGGPPEQARVPAEGDPDWHPQMGPSCKDVVVDVTTNLVTVTIKEFPSEA  
SGPASVPSAEGAASPLPCAADTTDTTPPKP

>Hco\_Cbx7 (Gene ID: 109512097)

MELSAIGEQVFAVESIMKKRVRKGNVEYLLKWKGWPPKYSTWEPEEHILDQRLVQAYEEKEQRDKTLGHRKRKSKAKK  
RLLQNTVYTMDLRSAHKAADMPKPRRLRLSLTRSLLPEDDEEEEEEEEEEEEEEEEEEDPSYTAWRRAPRYNKR RP  
RSRCLNFRPASPAHEDWKS LGEEEEVEEDLVGDEEEENEDTGEKTAGQRRSAAWSVPVSGDHLTEAMPE TAWRPVVG  
PAEVTVTDVTTINALTVTFREARVARGFFRVWGGGGLSGAPRFSKLIVNASS

>Hco\_LOC109527051

MELSSIGDQVFAVESITKKRVRKGNVEYLLKWKGWPPKYSTWEPEDNILDPRVLVAYEENQQKIRALAYRKKGLRPRS  
LVLRNIFAMDLRSAHKAPDKPAPRLRLSLTRAMSTDVDHIERGAYCRSARRRRTKQLASKRSACARSNRTVGHRKK  
TEDWDDTSEEKQESQSATEERRADSLYGHSECSSPPVLERHDLELDMEENGPKMFSDPEDVDVATIACDQSKDGAST  
LDDGAADAVTADNGSDGDTGEEEGQSRPVSPTGAHLKDDLTSAVAGADTVVRIQNVTTTATAQSQHKGKIMTEVTI  
NSLTVTFKEAAEAEGFFKDC

>Hco\_LOC109522748

MELSAVGESVFAAESITKRRIRGRWEYLVKWKGWSHKYSTWEPEENILDERLLAAFEERERELFGPKKRGPKPET  
FLLKAKAREKTYEFRDRPVRPIQVSYVPPEPIKTPAREGLRAVVPTIFPPSAVNRGESVVSQALEPERRPRSATSSH  
QESSPKKRGKPKLRHSYEQDDDESAEPAPKMSRCLPHDRTASDPSLAQLTRRFQEETTISPRSSSDHMGMA YTRTDL  
GGRTHYMALLKHRDKYRNLP IITGEELGVVCPPTASGSSWNPRFTNMDTVTVTDVTMNLTVTVRENYTDKGFFRGKR

MELSAVGERRVFAAESIIKRRIRKGRLEYLVKWKKGWSPKYSTWEPEENILDSRLFAAFEQRERELFGPKKRGPKPKK  
 LLLKAQATKSYEFNETMRGMRFYSATREPVVTHRAREGLRAVVPITFPSTVNRGESVVFVSPPDLAHEQQANSEELV  
 HLPKKRGPKPKLRFQDSIPAAEYEDERRADELNSHSPQKLMKLSQGEDMKLLKVSHHRSPEYHGHSHKHHRRHHHHH  
 HSHSQNRPMPTGRGSHQQLYAESDLHSQRDTHRTKNSSGSPSKHQRGPSQLVPTEKPYFLDKPSPTRLVDVNLDENVTRPSL  
 CSVEKVLVTDVTANFLVTIKESSTSGFFFKDKR

MEELSAVGEQVFDAECILNRRLRKGLLEYLVKWRGWSSKHNSWEPQENILDPRLLAAFHKREQEKEILFRKRGRPRG  
RPRKIMEAVPAATKSSSSSSSSSSSSSSSSSSSSSSSSSSSSSSDDNDGEEAKVKAGQRGRELHPVPQKKAQIVVAKQ  
EPVKKKRGRKALPPELKALRQSKGARKLLRPAARERELLSQTQESKTPIKKPLQPASFTYTGMRSRVGGAREPSGAQSR  
GSFSQAVRNPLGAVGPTRPTATSPSVSVRPQNKATPDFKLSVSDVSGSDLDLRITTSKSPGVAAALNLHNAKVSCGGGG  
PGTGASSAAGTPNGRKQETPAQLTSLRPAAQPLSKGPGQLALSQGLNLSQSVRTQGCVSTGNGTANPKARPKGPSQN  
PQTGGGGQQTRRGLGGGQGRVTEAGELGLTDTRQAKKSRRAEPSSTSPAARGRRRPPSSKDGKPGKPVLEMSSTGE  
EESSDSEHDSPLPSPAQNLSVSVQFQMOWKPTRLIEHVFTVDVTANLVTVTKESPSTVGFFSLRQY

MELPAAAGEHVFAVESIEKKRTRKGRTEYLVKWRGWSPKHSTWEPEENILDPRLLVAFQNRKQEQLLGYRKRGPKPKH  
LLVQLPAFARRSSVLSQLGSSLDSDSRQKSDAVPMHRSQTQQYQLNSKKHHQYQPNCKEGQVEQQIHGKKKFYYQL  
SKKHHHYQPDPKMYDLQYQKTREGKGQESNSQGWNLPSALQEKWLCDKDISLNKISSLTEDMKKLPGFQNGSEPTLTS  
NNKEPVVPNGISSKMKIVKNKNKNGRIVIVMSKYMENGMQSARIKNGDPNSAERPNDAKLSSEDSSAESLLDKIKLVKK  
PVQDNLGLPKENKTEMSATPLPLTQSSVEQHSKAKEDITVTEGEKTDCEGSGQPDLPQDLQLTLTKPNLTPWPFEMGVL  
SRLDHSTNPGLSTPSLKRQLSEPLEDRGYKFISSRSITSPSSVSPQTKPMDNLNLSFHCSPKGPCDFLDSIP  
EEPIDLSCVKPRAEASTPPKSLTPVDQAKATTAAEAEDPKPCFKPLFNGIIITDVTANCLTDTFKEYITV

MDLPATGEHVFAVESIEKKRFKKGRIEYLVKWRGWSSKYNTWEPEENILDPRLLTAFQNRKEQEQLMGYRKRGPKTkp  
LFLQLPSFARRSGLFSEFQEMSLEEEHRSKSDPVMMSHLQPPQYQLNSKKYHQYQPNGKESVMEQQANAKKKYFYQL  
SKKHHHYQPDPKYIDLQFQKPKEVKGEPTNHKWKLPPTTHQKWVCDKTPGCLSKMKDLSLELNKSEGDKEEISCNPK  
EMDLPNGISSMKKIKNKNKNGRIVIVMSKYMENGSSQSAKIKNGDPSVVEKPDVGKRPEGESQKFIDGAERIESPAL  
ENGTSDDYRSVACNNDSKQTDGQNCRSRGEQANEKELIGGDGVGVAVSRVEPNMTHQSPASPMMNKEGDRPAPSARFL  
KRHLSDEPDHGRSKVFLSVRSVAGGVPTAADEPHSYGLSYSQQSGLGVDLEEPIDLSCVRSRQERDALPKAEL  
PSEGDAKAKPEPSCAFRPFLGNIIITDVTNCLTVTFKEYVSV

MELSAVGDRIFAAESIIKRRVRKGRIEYLVKWKGWAIKYSTWEPEENILDGRLIAGFEQKERERELYGPKKRGPKPKN  
FVLKARAQAAETRGPSRVPDVRLRQSTGSSSRPSTSSAPSSSMSSSSSTSSSSSAPT PKLHSGAASHKLK KDIRRCHRI  
SRRPLRPDPPLASGSAGGFPSRPPVSPFSETVRILNRKV KPRETKRGRIILNLKVIDKTPQPPTSRGRNIPSRNRI  
IGKRLNEVSYRGLQPPVKLPGFPMYKGFPGVQVQSSSDVGRLRAGTGNSTRSCGGAGNSGPGSSNRNSASETHGGTAEF  
PVSQYQAPPPSSSSGGVDDSSPPGPQAGTPSEAPPQSLHVSAAASAPFKLSPQASSEPEDALGLQP GPQFASYLPSC  
PSSSPSSSSSEDDEAAVDLSAPRIKTRRPGRQRRRRNPNRATAGTSSDPDSSPPLSPPEPPRAVLEGD PDWHPE  
MAPCCADVVDVDTTNLLTVIKEFCRPELDKSGSPASPSSGATAPPSPPTSTPHPKP

MELSAVGDRVFAAESIKRRVRKGRIEYLVKWKGWAIKYSTWEPEENILDGRLISAFEQKERERELYGPKKRGPKPKT  
FLLKARAQAAETSTQVPDIQQYHSSASSTSRPSSSSASPASSLHSPYPSSSSSSSSSAPTVKLQSGAAHHKLKDDIR  
CHRMSRRPLPRPDPLAPPSGSSSSSAFPSRPPVSPFSETVRILNRKVPREAKRGRIILNLKVIDKAGGRRAPSMA  
HQQGMHHSQPGRPKIPSRNRIIGSKSRFTEVPYRGLQPPLKVTGPFMYAKPFGIQQPISQSQSSTGSSSENTGKGAGE  
GAPPLPGSALLNPDSVMPEPQTLPRYQPSPPSSSTSSGSDSGPNSPPHIQPTPLQAIPEPASAASPPPNLSPKPLESK  
QEAPHNPSPFLPSPSSIFLSSLSSSSTSTSEDEEVLDSLVPHEDKRNARRRQHMRLQGKSASAIISPLTPKNLGIG  
PILLSPEQTRTLSEGNPDWHPEMAPRANVVVDVTNLLTVTIKEFCHPEFEKPEPPSPSSSSSVLQVATPSSAATA  
TCQSKL

MELSAIGEQVFVAVESI IKKRVRKGNVEYLLKWKGWPPKYSTWEPEEHILDPRLLVLAYEEKEQRDRALGYRKRGPKPKR  
LFLQNVYTMDLRSAHKTPEKPQARLRLSLTRSLAPEPGTELPPCQGGGGTLYGQLAQPRNKQRASQILRLSPQPATTP  
PAPNRSNGDWGHREDEEEEEEMEEEEVQGAEADMLNGPDRAEGWSSSMDEESVTMRERP EGWNPVMGPGEVTVTDV  
TINSLTVTFREALAAKGFFRDWGLEF

MELSSIGDQVFVAVESITKKRVRKGNVEYLLKWQGWPSKYSTWEPEDHILDPHLVLAYEEKEEKDRALAYRRRGLRPRK  
LLVQNIYSMDLRSSHRAPVKPPPRRLRLSLRSLSLGAELARGRDRAAGGSSSRQKKRRRLSQQSSTERPARAAVRDFPN  
QDWRAEDEKKETVVDAAEKQADSVPI SKSDLDPDGKEEQNPLSKLVQBELTGLGVVHDQPGGPTPVSELQKEATTHGSP  
SDSSSGSAVTAGATEGQEANDPDASVQEQGVRTPTDGLAEDRDLGTELRAAADPPRTNGCILVTGPGEAAFNGAPLSD  
PTVPTPSGQPESSKPEETQSSAVSGQEQESRMTPTVEFKEETSDITGGAAPGAERQEGAPSAGEPGTVIVTDITINS  
LTVTFREALAAGKFFFAWGLSELKCGGGE

>Pki LOC111843316

>Sfo LOC114909229\*

```
>Sfo LOC108932946
```

```
>Sfo Cbx4 (Gene ID: 108939836)
```

```
>Sfo LOC108937346
```

>Sfo Cbx6b (ENSSFOG00015008724)

```
>Sfo ENSSF0G00015032962*/LOC108938841
```

>Sfo LOC108938841/ ENSSEFOG00015032962\*

MELSAVGDRVFAAECILKRRVRKGRIEYLVKWKGAIKYSTWEPEENILDSRLIAAFEQKERERELYGPKKRGPKPKT  
FLKRLQAQAETTTTRVPELRQYQPAASSSSRASSSSASPASSSHSVYPSSSSSSAPTAKLQSGAAHHKLKDDIHRCHR  
MSRRPLRPDPLAPPQSSGSSFSRPPISPFSQTVRILNRKVKPREVKRGRIILNLKVIDKPGSSAGATSRRTAIS  
HOODSAHSTHPSGRSIPSRNRIIGKSKRFGEVYPYRGLOSPLKMPGPFMYGKPFQIOOSGSGPGPAOTGPGHYATGTSG





QDEEKETGETDSDAKRETDKDEVTAECTTTQLLSAEVRTDESQASECTRHGPKVIVTNVTINSLTIVTFKEATAAEGFF  
SSYGLQV

>Ipu\_LOC108273945

MELSAIGEQVFAVESIIKKRVRKGNVEYLLKWKGWPPKYSTWEPEEHILDPRLVLAYEKEHKDRAVGWRKRGPKPKR  
LLVQGIYSMDLRSAHKAAEKSPGHLHLSLTHPLNPQAGHTAQKFCSKESDVYRQLVHHKRRKRNKGYSVEDWEELEK  
DDNYEEVIRQEETETGRATLNSNVETERWSPITGSEEMTVSPVCIEWRPFVMGLEEVTVTDVTINSLTIVTFREALVAK  
GFFRSWELEL

>Ipu\_Cbx8 (Gene ID: 108272375)

MELSAVGERVFAAESI IKRRIIRGRMEYLVKWKGSQKYSTWEPEENILDSRLFAAFEERERERELFGPKKRGPKLKT  
FLMKAQAKAKARSYEFRGESSRISIRINYNPNEPLVTPRAREGLRSVVPTIFPPSTVNRGESVVRPAHQELTQDHRPLLS  
QRAESGRMGHPIPKKRGKPKLFRREGYSSVLHSEKSKMDESMGIPSKMARLELGEDDEDALSARSQKRQNPPLFPRT  
LEWTKTSDECRTEHASSHFHRKYLKHIRHHRAFKHGDTLAIKHQHSHHHQHHPHHHHHHHHHHQPSLIAKIPMARILG  
EPEEEAEQEEDDPAWRPCFSNVEKVTITDVTINFLVTIKESDTEGFFKDKR

>Ipu\_LOC108261002

MELSAVGERVFAAESI IKRRIIRGRMEYLVKWKGSQKYSTWEPEENILDERLFAAFDERERERELYGPKKRGPKPET  
FLLKAKAKAKSDEFREMSREIRVSFPVAEPVTPRAREGLRTVVPTIFPPSTVNRGESVVRVRSPEPERRPRPPLSPT  
HSLDPVNTPKKRGPKPKLRFVPVAPSSSYSPTESLKRRADEHLSFSPAKMSRPAHSGESSNCSLIQLTQRFQAESG  
KSPKQLGCGSSGVALGGTLRKTAHMLRHGTHKFSSGPSVAHTKRKHLKSNLSFQPDLDLPIDRLSPKYPVPQNPGE  
DEESWSPCLKNMEKITVTDITSNSLTIVTIKESSTDQGFFKEQR

>Eel\_LOC113568410

MEELSAVGEQVFDACIILNKRLRKGLLEYLVKWRGWSKKHNSWEPQENLLDPRLLAAFNKREQERELLRKKGKRPRC  
RPRKIMKTPTLSKTSSSSSSSSTSGSSSTSTSSSSSEDDDDDDDDDDDDDEVGDRKRKPSPRVRELHPVPQKKAQ  
IVVAKPGPPTKRRGRFLAPELKAQRQIQAKGPRKLAKHTAKDSLAE LRASIKKPLMPASFTYTD RVKAE EASSPADR  
MGRAAQARPHKGPTDTPRDRNGSKVGKAPSGTSTGEEGSSSESEQESFPYPSDRQDVSVGVQTGPDWRPTRSLIEHVF  
VTDVTANLVTIVTKESPTS VGFFSIRNY

>Eel\_LOC113578871

MELPAAGEHVFAVESIEKKRIRKGRFEYLVKWRGWSPRYNTWEPEENILDPRLLVAFQNRERQEQLGYRKRGPCKPKQ  
PFIQVPSFARRSSILSGLQEAPHDACLRMAMDPAQAQQYQLNSRKHHL YQPLPSES PGGTVPNGKKKHYYQLNSKKHH  
HYQPDPKMYQMPCDRSKEPAVPQVGRDGSWLPPTLQKQWEDSDRCLGKAQDFTMELNGGGHEPELSAELPVKQDGAPA  
NGISSKLKIVKNKNKNGRIVIVMSKYMENGIQAARVKGGEVDGGLKQSEQLPESKAEDVDNEKNKLPKKHGFESLGGC  
KDSKGQDKPPLCGLMNRTTLPD SVMSGPVA AEVNKEQEFRLNEHSTHEDQPLQLTTKSLSPKTSEKAVPSQLDQRNR  
QGAHKRCSELDRDHGEAKRFVSVQSAPNTGTSGCQNCCTNLNGHQLTNGRKFEFQHSSQDEPIDLSCARSRKERNS  
VMDCQINGNSEQCEKETEITVEETPFTFPLGNIIITDVTANCLTIVTFKEYVTV

>Eel\_LOC113573270

MDLPAVGEHVFAVEGIEKKRIRKGRIEYLVKWRGWSPKYNTWEPEENILDPRLLVAFQNRERQEQQIGYRKRGPCKPKH  
LLIQLPAFARRSSILAGLQETSLDDENHLKVDLSQMHSRQPQHYQLNSKKHHQYQPCSKEIPAEPHVNGKKKYFYQLN  
LKKHHQYQDPDKMYEQSTPKPEVKCHDLSINGWNLPTDLQKRVQDKEPDCIHKEKELAEHKLPTVNNKADQTVKT  
SPKEPSGISSKMKIIRKNKNGRIVIVMSKYMDNGVQPSKVKNVDSAIMEKPPQNEEILNGSTDNHVPVTTGQENGTL  
KDHGVSSASALSEFVHKVPHRKFE LLKAKPDIEVEHKTEDASLDKFGLSDDQPLQLTTKPSSSPLSAQTD MV SQRD FP  
TYQSRHKRNLSDPNESNSNCKRFLSSRSISGSNPALSSPESEPIDLHYSGHSTTRAYSYEFTDVIPEEPIDLSCGR  
RLQTEGPAEPHVMTMEDIPETSEKFE EPVSCFNPFVGNIIITDVTINCLTIVTFKEYVSI

>Eel\_LOC113569862

MELSVAGDRVFAAAEAILKRRVRKGRIEYLVKWKGWAIKYSTWEPEENILDDRLLVAAFEQKERQEELYGPKKRGPKPKT  
LLLKSRAHAAEGSPRVPEFKHSRPQSSSKPPPQPPPLSPSPYPPSGPSNAKLQSGAAQPKLKKDIHRCHRISRRPLPR  
LDPLAQVVGSSGPFSSRPTVSPFSETVRILNRKVKPREVKKGRVILNLKVIDKPGGGGVANNRRTPSATHQPHIGRQK  
VPSRNRVIGKSRFGDVSYRGLHLPATAAGFPVFGKPFECHPMEVSEEEKPKVEQCVPKVACNSSSLPSSSQSPKVMTP  
DIPKALSEPPCSPSSPEVSEGE LLFPPTHPQPPPSAAQPCQANLAILPPAKPNTQLTDCKPNSTPAQSTLPSSPMFS  
SSSSSSSEDDSEHILDSLVPHTERRCRRRNSFGPRRPAEFEPENLPHKVSEDEDLDWRPEMAARCANVVVDVTTN  
LLTIVTIKEFCHEPGLPPPVSACFSNHLASANKNTNTRP

>Eel\_LOC113585732

MELSAIGDRVFAAAEAILKRRVRKGRIEYLVKWKGWALKHSTWEPEENILDDRLLITAFERKERQEELYGPKKRGPKPKT  
FVLKARAQAGEPSSRGSTTRQAPRSSSSSVAPANPPSSSSSSSLAPT PRLHSLAASHKLKDDIHRCHMSRRPLPRP  
DLLANPDGSSSFASRPPI SPFSETVRILNRRVKPREVKRGRIILNLKVIDKYSGGGGATHRRPAQSHQGRAQIPSRNR  
IIGKRQGELPYRPFQPPMKMPGPFMYGQPFGLQPCPMVSVKTSRSAGPTTGSKGAGRNCGPGHSSAEQFQSPSPSS  
SGSESDAPSLPQIQATPPKAPSDAPSSPPVLSPETPSRATDDPQNCPSAAQPGSVSDVPVFLPSSPSLSSSSPSSSS  
PEDDDERARNVPPAPKDGKWKPRRRTRASVSKSARQGDNSRPLAEKSAPERGD PDWRPERAPSCANVVVDVATNHLT  
VTIKEFCQF GAGSAGSVASAPASPSHSENLTSTPSSA

>Eel\_LOC113574891



```
>Eel LOC113588928
```

```
>Eel Cbx8 (Gene ID: 113578829)
```

>Eel LOC113573271

>Cha Cbx2 (Gene ID: 105898869)

>Cha Cbx4 (Gene ID: 105892293)

>Cha LOC105891371

>Cha Cbx6 (Gene ID: 105912870) \*

>Cha LOC105903838

MELSAVGDRVFAAEAILKRRVRKGQIEYLVKWKGWALKNSTWEPEENILDDRLVTAFEQKERQQELYGPKKRGPKPKN  
FVLKARAHAGETSSRAITDPRLISRSSSRPPSSRPPTSRPPSSTSTALVSAPASSSSSSSPAPSPKLNLSAATHKLKK  
DIRRCHMRSSRRLPRPDPLAPSSGSGSFPSRPPVSPFSETVRIILNRRVKPREVKRGRIILNLKGSCMDKAGGGGPAAR

RAAIPSRNRIIGKRFGDVPYRPFQPPMKMTGFPMYKPYGMQRIGSDSFQANAGMASNTEASIGGTSAPASASTPHAV  
PQYMSPPSPSSSSGSDSRPPTPRQSKLAAPHPPRTRASPCKLRAPAAPQSGSGTSQHQPATAQAAPVESAAFLPCSP  
SLSSSSSSSLEDEEGEDAANLSASQVKRSLRRRRSQASQPTSASDNNTVSSPAEDATSAALPGETRAPVEGD **PDWRPE**  
**MAPRCANVVVTDVTTNLLTVTIKEFCQF**AEAGSGPPSPSATSSSPPPPSQAELPSLPLPATSVAQF

>Cha\_LOC105888811

MELSAIGEQ**VFAVESIIKKRIRKGVHVEYLLKWKGWPPKYSTWEPSEHILDPRLVLVYEEKEQ**RDRALGYRKRGPCKPKK  
LLLQNVYAMDLRSAHKPLTQPPARLRLSLTRTLDPESEPTSTDQHYQLAGGGLYDGLAQHKNKQRLAQYVCVPSHPQTP  
TPSQGLSEEDWEEEEEEDEDEEDGDNEDDDENGPEEAEGEMAMQGDALSRPGSKCWSPIAQPEEVTASQIS **EGWSPF**  
**TSAKDITVTDVTTINSLTVTFKEALTA**KGFFRSWGLEF

>Cha\_LOC105897974

MELSSLGEQ**VFAVESITKKRVRKGNVEYLLKWKQGWPKYSTWEPEDHILDPRLVLEYEEREE**KDRALAYRRKGLRPRR  
LVLRLNLYPMDLRSATKVPEKPPPPRLCLSLTRAMGAELDQGVACRAGVLRRLKRRSKQGSVRPPLRAARPPPPPP  
TEKPPPHHTEEDDCGGGKGHDVMEQPDREIVLQDDNKTEQDDNKTDQDKDIPSAQYSDGYCSSTEQDMALMSEMA  
AEEDSGSCRGPREESVVECETPPVAGGTGLMKNDTGRRTQGDHPLNTTTPNGLGSDSPSEETPDVVPMTDDESQSSS  
TTACEADATHISLDTVHSCHEPTDSSSTDTCIKAEAYKLVVVSQDVAIAEKGS **EGSTTSGKVIVTDVTTINSLTVTF**  
**KEALKA**EGFFKGCME

>Cha\_Cbx8 (Gene ID: 105892295)

MELSAVGER**VFAAESIIKKRIRRGMEYLVKWKGSWKYSTWEPEENILDSRLFVAFDERER**ERELYGPKKRGPCKPKT  
FLLRAQAKEKGKTYEFSEANRGIHVITYSPPEPVTPRAREGLRAVVPTIFPPSTVNRGESVVRVQPEPAHERRLPPA  
LSRPTGDFAPIPKKRGPCKKLRFKDGLLTGPPREQLKDGLLTGSPREHRFKDGPLTGPPREQLKDGLLPGPPREQ  
RLNDGLLTGPPRELAKRRAEPPVYGASKLAKHALADGQDRDSEMRVIKLAHRPLQGPPSYPPKPPTRLMFAGGSRQH  
CPTGRSSLHSHRPLGLDAHGSRTTDCVLRQTPHLKHLAHSLLQREDAPAQRPQPTLIAKIPISHLLDGPEKD **ARWNPCIL**  
**TNLEKVVVTDVTTNFLTIVTIKESSTD**QGFCKGKR

>Cha\_LOC116220815

MELSAVGER**VFAAESIIKKRIRRGMEYLVKWKGSQKYSTWEPEENILDERLFAAFEERER**ERELYGPKKRGPCKPET  
FLMKARAKAGKSYEFREMSRGMHVSYPVAEPVITPRAREGLRTVVPTIFPPSTVNRGESVVRVQPELERPRPTGSPM  
RVTDSEFVSTPKKRGPCKKLRFNVNASSCAYTEVSKRRSDEQIAYGTSKMGRYGHREGMSDCSVTPQMTLRFKPNFKKT  
MVAATSGYHLIQASALSKPRQDIQGHRTVKECSSETLQQSKGHNPSRPHSYEDDELETEQSGSKQPVPSIFGDQSNES  
**WRPSISNMEKVVDVTSNFLTIVTIKESSTD**KGFFREK

>Dcl\_Cbx2 (Gene ID: 114794490)

MEELSAVGEQ**VFDAECILNKRLRKGLYLVKWRGWSSSKHNSWEPQENLLDPRLLAAFNKREQ**EKELLFRKRG **KRPRC**  
**RPRKILDI**VPTGTKSSSSSSSSSTSGSSSTSSSSSEEDDDDDDDDDENDRKPCKPGRPRELHPVPQKKAQIVMAK  
QEPiRKKRGRKALPPELKALRQGVPRKMVARDTLVDFRGAIKKPLQPASFTYTGFGRNSSRDSIGIHNRGSFTSGGL  
KPQFSTLGSRCRSGSTSQSFSRPVQSKSSPDFKLSVSESGNGGGGSGLDMNSSACKSPGVAALNLHNSKLSATTNQG  
HQQPQAAMSSASGQKRHEAPHGQTPLQRMNSSKPVGSFSLAKSPTSQAMNMQALNLQSVNRPTGNGGTPVANQRSANN  
PMRKNHDLRQDLSPAPNPGLTQSKKSQPGGDKIKAEDTADFCSTGERLAKKPQGRVEKNTMLNTSTEIPGSRDRSSSK  
DGAKGKSLSEMSTGEEGSSSDSEQDLFPFGSDRQDLISISVPAT**QDWKPTPSLIEHVFTVDVTANLVTVTVKESPTS**VGF  
FNIRNY

>Dcl\_Cbx4 (Gene ID: 114786797)

MELPAVGEH**VFAVESIEKKRIRKGRLEYLVKWRGWSPKYNTWEPEENILDPRLLVAFQNRER**QEQLTGYRKRGPCKPKH  
LLVQLPSFARRSSVLSGLQETSLEDDKWHKATPIQPLCPPGQYQLSSKKHHHPYQPHGKEGPAEQAAAGKKKFFYYQLN  
SKKHHHYQPDPMYDAQRPKAKEAKVPETLPATLWLKLSALQKQWTRDKDSGCLSEVKDITMELKKLPACLEGSGEPE  
VSAGAKHDSAPNGISGKLKIVKNKNKNGRIVIVMSKYMENGTQAARIKSGEADKAGQGAAAAENGPAISRKRDSVPP  
CGNTAGPEGTSTSGPVAGQKDQSAGVRGREELPSDRPLQLTAKLSAPPTSGPLSHLDQKQTTGLPSKRSSSEPHEDQ  
GGVKRFLSSRSMSAPGAVAPPPSAGDADLYGLSDSNPEEPIDLSYVRTVPVKDGRNGVSLAQNTNPAEPAAPAPTAEA  
AGRES **FPEFKPFLGNIITDVTANCLTVTFKEYVTV**

>Dcl\_LOC114793848 (a)

MELPAAAGEH**VFAVEGIERKVRKGGAEYLVKWTGWPPKFNTWEPEENILDRLLVAFENRER**QEQLLNCHKRGARPKD  
LLLQLPSFARRSSFPFGHPQAYQLNGKRHHKPKPRLSAEPVHSASRQDRDLESSAMHPKRVQDGPSPFLREVNNFAR  
EMNEPNANNNSSSGREQPPNPINSKMKI IKNNQNGRIIIVMSKDVDGSPVPSSEKNRHSSGTRRAEQTDGSGGMIIP  
VRNSCGKVLLEADVTRRRDPAQPDSESVQLNSSRARLTPKRHERQLLNPPQANGSALPSKPTGLQGGGPDSSRNGSEHDPA  
DAHPDQFINLSLADAEQARAPPAARATEQKRQKLLSEAGEPAS**YFKPFNGNIVITDVTANCLTVTFKEYVSD**YMDVDP  
ERVEYYGLRGAGVN

>Dcl\_LOC114786320

MELSAVGDR**VFAAEAILKRRVRKGRIEYLVKWKGWALKYSTWEPEENILDDRLLITGFERKER**EQELYGPKKRGPCKPKN  
FILKARAQTGDTSNRFVARQTHNRSAAATRPSSSSASSVLAPHTSTSSASSSLAPTAKLNSLAATHKLKKDIRRCHRM  
SRRPLPRDPVGPSSNTSFSSRPPVSPFSETVRIILNRVRKPREVKRGRIILNLKVIDKPGSGAGTSSRKVPTSHLGRA  
TIPSRNRIIGRKCGNMPYRPFQPPVKMPGFPMYKPFGLQOMNPVPFQTHIRFGCNTNARGAHSTASATTGAPQALQ  
HYQPPSPSSSSGSSSQPPSPPSIQVSAPS AVAGAPTSTAKLRSQTQPPQPGDPQFQPGSTQASTAPVFLPASPSLSS





>Ssa\_LOC106606946  
MEELSAVGEQVFDAECILNKRRLRKGKLEFLVKWRGWSSKHNSWEPQANILDPRLLAAFNKSEQEKEILICKRGKRPRG  
RPRKVVEITVPEVSKSSSSSSSSSSSGSSSSSSSSSSSDDDDDNNDRKAKPGPRTRELHPVPQKKAQIVVAKPEPPR  
KKRGRKALPAEMKAIQQNKGQRKI IKTVAKESPADLRGGIKKPFHPASFTFMGLNSRGPLSVQGRCSLAQGGTTKSSM  
NTAGSGRSNTSASLSFNQRCNQSKSQASDFKLVSVDVYSAGLCLKTTASKSPGVAAALNLHNSKLSTSNGNPQGAQP  
QLGSHNGQKKPDAPGQTPLQQVPNNKPAAPFSTPKGPANQAASLQALNLQSVNKSPTPGNGTPGNGTAPVSNLRSTANP  
VRKDTVGQYQGEKNPVQS PATPGGQQPRKSHPGIKVKAETSEVGMAERPERLTTRAQGRVEKSIQNPSVEARDI  
LGKRERSASKDSKGQAKVLLSEMSTGEESTSDSDQDSPSNSQDLSISVQTGDQWKPTHSLIEHVFTVDVTANLVTV  
TVKESPTS VGGFFNIHNY

>Ssa\_LOC106589865  
MEGVTVGHVFDAECILNKRPRKGKFEYLVKWRGWSSKHNWEPEENILDPRLLAAFHKRAQERELLFRKRGKRPGRGRF  
RKILEPEPTETKSDRSSSSSSSSGLSSSPSSSSSEEEEDHGKKAKPGPRLRNLYPVPQKRPQIVVAKNEPVRKKRGRK  
PLLPELRALRQAKTRPPLPPSPSRHHQVLRPPPEFFKEEPRGGVKKPLQPASFTYTLGLSSRGSRDEVAHQVAAGGA  
FYQAGASKPGPLNSIWSGRSMSTNTPTSPSSSSSSSSLSRAPPPYSKGSWDLKRSLSVSDTGSSNGRAEGLKVASSLK  
PGVSTSTSLCLHSSKTSSGFRDSPTACSPAQRFPAGQRRQEGPGGQAGMVVQQGAKPPSSTPPSARDRISQALSLR  
ALNLQSVKKIAPGNGLQGNGTSGTTGVAVSRLSLRSSASPAGKRAGGSIKETHTSSGLNQLVSGGLGGGALHSGSV  
PARVERGERGKDTGAETEREMDNKPGPGVGRNGRVEKGSVQAQGGVSTVRRGRANGGRQEDRKSQSLTINERN  
SGDNSRTLNELSTGSDDTSSSEEECDSSPYPDNNNNNGARLVSMEMETE TDWRPARSLLEHVFTDVTANFVTVT  
VKESPTS VGGFFNVRNH

>Ssa\_LOC106606687  
MELPAAGEHVFAVEGIEKKRIRKGI EYLVKWRGWSPKYNTWEPEENILDPRLLVAFQNRERQEQLMGYRKRGPKPKH  
LLVQLPSFARRSSIPAGFEETSP EAENHLRSDPIQMHRSQPQQYQLNSKKHHQYQPSKQEV SADQLGNGKKKLFYQLN  
SKKHHHYQPDNMYNTQSTRPKDVVKQGEPSPPTNPNGWNLPPALQQKWVRDKNTGCLSKVKDMTVVEMKKAACVCN  
EAASECALPKSPKEAALPSAVSSKMKI IKNKNKNGRIVIVMSKYMDGNKAGAAKGHSSDLTGEEKPQHAEQSDMTKV  
QGTTNVPKEICNASSPPAAEHPPKRSLEDGHFSKPS PSTAEYNT EVARGQADLPDDHPLQLTTNPTSPSPWMDTSLP  
TSPSMDQIRLTPLTTRNDKHKLSHFEEDRGACKKFLSSRSISVPSAVPTPPQDKPMDLHLIVPRSSSSGYGYEVD  
TSQEEPMDLSCSRTRNKQPEPEPVEPEPEPKDPTAVVQESETTTMTTTTATTTTTEAEAEVVLKFSPFMGNIVITD  
ITTNCLTVTFKEYVSV

>Ssa\_LOC106588430  
MELPAAGEHVFAVESIEKKRNRKGRMEYLVKWRGWSPKYNTWEPEENILDPRLLDAFQNRREYEQLMGYRKRGPKPKH  
LMGQVPSFARRSVLSGLQETTLDEDNRQKVDPIQTQRSQTQQYQLNSKKHHQYQPLLAKERDAEQQANGKKLYYQL  
NSKKHHHYQPDPMYDSTQCMKPREATKAPELPTNHSWNLPALQQKWVRDKDSGCLSKVKDITMELKKLPAHLNGHS  
GESEQSKATDKEDAPLLKANGVS DSKLKIVKNKNKNGRIVIVMSKYMENGMAARIKNGDVETLDEQPLMNLDEQPDN  
NDDAAENQLEKMRLVHQLGLTNGFAKDYNKGSNRSNVFKCPADKVDSPKMELSATEQNKHFNVRGQKEATEDQPLQLT  
TKPNLAWPFWFMGVHRTQPGNGSSPALKRHLSEADKGEDRGCKQFLNSRSISAPCTVSSPPQNSMDSMDQNGHSHIGH  
QDYDFLESNQDEFPMDLSCVRSRREAPVPTETQVAPSAEEKTAEQTKLPLAITTEQTVKGEPPFSFKPFLGNIVITDI  
TTNCLTVTFKEYVTV

>Ssa\_LOC106564893  
MELPAAGEHVFAVESIEKKRNKRGRMEYLVKWRGWSPKYNTWEPEENILDPRLLDAFQNRREYEQLMGYRKRGPKPKH  
LIGQVPSFARRSVLSGLQETTLDEDNRQKVDPIQTLRSQTQQYQLNSKHHQYQPLLAKEREAEQQANGKKLYYQL  
NSKHHHYQPDPMYDSTQCMKPREATKAPELPTNHSWNLPALQQKWVRDKDSGCLSKVKDITMELKKLPAHLNDHS  
GESEQSKATAGEDAPLLKANDVSDSKLKVKNKNGRIVIVMSKYMENGMAARIKNGDVETLDEDPQPDNDAAENQL  
EKMRLQKAKLETGFAKDCNKDVKHLVLSGNSGNVFKCAEKVDSFKMELSATEQPLRLTTPKPNLAPWPFEMGVQR  
RTPQNGSSPALKRHLSEADKGEDRGCKRFLNSRSISAPCTVSSPPQSNMSDQNGHSHNGHQDYDFLESNQDEPMD  
LSCVRSRGEAPVPTETQVAPSAEEEEKTAEQTKPLAITTEYTVEEPPFSPKPFGLNIVITDITTNCLTVTFKEYVTT

>Ssa\_Cbx6 (Gene ID: 106591466)  
MELSAVGERVFAAEAILKRRVRKSRLEYLVKWKGWALKHSTWEPEENILDGRLIAGFEQKERERELNGPKKRGPKPKN  
LPAKARGAQKRETPTTAPRSTSSSSPRAPSSSFSPASPAPSPKLNSLAATHKLKKDTRCTSMSRRPLRPDPPLATP  
GSFSGPSGFPSPRPVSPFSETVRILNRRVKPREVKGRIILNLKVIDKPGSGGGGGRGGGNRRAPSGSMSLQGGQRNI  
PSRNRIIGKRSGEAPYRPFQPMLGFPYMKPFGLQCGGPGPLHLPHSATGSSTGTSGARDTQPPSPSSSSSGSTTPGQ  
NHPTPPGPATGASQAPNLASAQSSASAQSTPSHPPELQKNQNAEQGPTPLLPSSLFASGSSSSSFDEEEDDADALDL  
SAPQEGKRKLRRRRQKRPQSSVSTASPHPPGACPLISNPQRVPAEGDPDWHPEMVASSANVVVDVTNLLTVTIK  
EFPSPSSRPSSPQPILPENTTSSPPPPPPPLKNPPTVQAIGRD

>Ssa\_LOC106564427\*  
MELSAVGERVFAAEAILKRRVRKSRLEYLVKWKGWALKHSTWEPEENILDGRLIAGFEQKERERELHGPKKRGPKPKN  
LPAKARGAQKRETPTTAPRSTSSSSPRAPSSSFPSASPAPSPKLNLSAATHKLKKDIRRCT

>Ssa LOC106595625\*

TVRILNRRVKPREVKRGRIILNLKVIDKPGSGGGGRGGGNNRAPSSSSMSLQGGQRNIPSRNRIIGKRSGEAPYRPFQ  
PMLGPFMYGKPFGLQCGGPGPLHLPHSATGSSTGTSGARDTQPPSPSSSSSGSTTPAQNHPTPPGPATGASGSAPNLS  
AQASASSAQSTPSHPPELQKNQNAEQGPNPLPSLSFASGSSSSSFDEEDDADALDLSAPQEGKRKLRRRRRQKRQPP  
SVSTASPPHPPGACPLTSNPQRVPAEGNPDWHPEMVASSANVVVDVTTNLLTVTIKEFPSPSSRSPSS

>Ssa\_LOC106608943

MELSAIGEQQVFAVESIIKKRVRKGNVEYLLKWKGWPPKYSTWEPEEHILDQRLVQAYEEKDQKDRALGYRKRGPKAKR  
LLLQNTIYTMDLRSAHKVPEKPPARLRLSLTRSLESEAEDPTYGACRRSVHPLDHHKNKPRRSQFVRLASPPGPPTP  
TQDPTHEDWGRRGEDEEEDMEEEEAQQDESARETEMSNGILNGQNRAEDWSSVIGSEEVTVSERSAVWNPVIGPGEV  
TVTDVTINSLTVTFREALAAKGFFRWGLEF

>Ssa\_LOC106589529

MELSAIGEQQVFAVESIIKKRVKKNVEYLLKWKGWPPKYSTWEPEEHILDQRLVQAYEKEQKDRPLGYRKRGPKAKR  
LLLQNTIYNMDLRSAHKALEKPPARLRLSLTRSLESEAEDPTYGACRRSLHPRLAHRKNKPRRSQFMCCLASPPGPPNP  
TKDPTHDDWGRRREEEDMEEEEETRQEQQSERETEICSGILNGQDRAEDWSSVIGSDEVTASERSAVWSPVIGPGEVTV  
TDVTINSLTVTFKEALAAKGFFRWGLEF

>Ssa\_LOC106607170

MELSSIGEQQVFAVESIIKKRVRKGNVEYLLKWKQGWPPKYSTWEPEDHILDPRVLVAYEKEEKDRALAYRRKGLRPRR  
LVLRSSLLLQNIYAMDLSAHKVPDTPRLRLSLTRSMGSELDQGSPLYRAGEGGSVYRRLARRKNKQRVSKPVSDNNS  
LQPLTRIQDPMHEHWQGAERPESDTRHSRSECSSPMMEQEVESSTDVRESGCGSALGSGDETLLGGALLRVTGAGYRS  
EGGTSETGQEQMDRTDQSESCVSAEGPKYLNISNRLVNSGTEVELGTDTLIDKVERLGTANVIERVEGLGTDYFIDKV  
EMGTHILIDGDSMTSMVDVGETVADGSVVCTDVEVAEEVVENDTKQQGEEVVTQCPDSSGAEVNPGKVIVTNTINSL  
TVTFKEALAAEGFFKG

>Ssa\_LOC106601246

MELSSIGEQQVFAVESIIKKRVRKGNVEYLLKWKQGWPPKYSTWEPEDHILDPRVLVAYEKEEKDRALAYRRKGLRPRR  
LVLRLNIYAMDLSAHKVPDTPRLRLSLTRSMGSELDQGSPLYRAGEGGSVYRRLARRKNKQRVSKPVSDNNSLQPLTR  
IQDPMHEHWQGAERPESELTTDTRENSLFRHSRSECSSPMMEQEEESTDRVESCGLGSGDETLLGGALLRVTGA  
GYRSEGWTSETGQEQMDRTDQSESCVSAQGPKDNISNRLVDSDEVELGTDTLIDKVERLGTNVNIVERVEGLGTDYFI  
DRVEEMGTHILIERDSTSVDVGETVADGSVVCTDVEVAEEVVENDTKQQGEEVVTQCPDSSGAEVNPGKVIVTDVT  
INSLTVTFKEALAAEGFFKG

>Ssa\_Cbx8 (Gene ID: 106588425)

MELSAVGERVFAAESIIKRRIRGRMEYLVKWKGWSPKFSTWEPEENILDSRLFVAFEERERERELFGPKKRGPCKPT  
FLLKAQAKAKAKSYEFRSDAVRGIRVITYPTPEPVITPRAREGLRAVVPTIFPPSTVNRGESVVRVPPELVREHRQPV  
QRPDPGDFVTVPKKRGPCKPLRFKDNPFSAAPAEPPKRAEEQATYGPLKLAKLGLSGGEERGSEMRGNKLAHRH  
QEELGGYPHKQIRPVASGSTQQHCGPDRSMLHSHRIGSDSQACRTKECPSNYFSPPQLKHLKSKNVHQPSSELPQRGK  
PSLIAKIPVSRILGQTDEVTWKPCLNNEKVLVTDVTTNFLTVTIRESSTDQGFFKDKR

>Ssa\_LOC106564894

MELSAVGERVFAAESIIKRRIRGRMEYLVKWKGWSPKFSTWEPEENILDSRLFVAFEERERERELFGPKKRGPCKPT  
FLLKAQAKAKAKSYEFRSDAVRGIRVITYPTPEPVITPRAREGLRAVVPTIFPPSTVNRGESVVRVPPELVREHRQPV  
PLGPDGDFVIVPKKRGPCKPLRFKDNPFNATSAATELHKRAEEQATYGPLKLAKLGLSGGEERESEMRGIKLAHRHQL  
ELGGYPHKQMRPVASGSTQQHSGPDRGLLHSHRIGSDSQACRTKECPSNYLSPPHLKHLKSKNVHQPNDELQPGRKPS  
LIAKIPVSRILGQTDEVTWKPCMNNVEKVLVTDVTTNFLTVTIRESSTDQGFFKDKR

>Ssa\_LOC106606673

MELSAVGERVFAAESIIKQIRIRGRMEYLVKWKGWSKKERERELFGPKKRGPCKPETFLKAKAKATAKTYECRREMPR  
GIRVSYVPVTPMITPRAREGLRAVVPTIFPPSTVNRGESVVRVLPETERPRPAPPPSFMAEEFVTIPKKRGPKPKLR  
LRFNMEPDSCPTTEEPGKRSRLEEQQVPYQSKMSRCHHEGETSERSVIQLTHRFQEGTSIVPKSNAQRQVGTMSHP  
GTHSHDGRVLVHKARLDHQSRTLECPGGMISIPHPKLKHVSKNHFYRASDSSSSMQQSRPIVVAKSPASRSSGEQSAV  
WRPRLDNVETVVVDVTTNFLTVTIKESSTDKGFFKDKR

>Ssa\_LOC106601767\*

DLAFQVHVYETPYLSNLTTFIQAKAKATAKTYECRREMPRGIRVSYVPVTPMITPRAREGLRAVVPTIFPPSTVNRGE  
SVRVRLPETERPRPAPPPSFMAEEFVTIPKKRGPKPKLRLRFNMEPDSCPTTEEPGKRSRLEEQQVPYQSKMSRCH  
HEGETSERSVIQLTHRFQEGTSIVPKSNAQRQVGTMSHPGTHSHDGRVLVHKARLDHQSRTLECPGGMISIPHPKLKH  
VSKNHFYRASDSSSSMQQSRPIVVAKSPASRSSGEQSAVSWRPRLDNVETVVVDVTTNFLTVTIKESSTDKGFFKDKR

>Ssa\_LOC106596252\*

MPRGIRVSYVPVTPMITPRAREGLRAVVPTIFPPSTVNRGESVVRVLPETERPRPAPPPSFMAEEFVTIPKKRGPKP  
KLRLRFNMEPDSCPTTEEPGKRSRLEEQQVPYQSKMSRCHHEGETSERSVIQLTHRFQEGTSIVPKSNAQRQVGT  
SHPGTHSHDGRVLVHKARLDHQSRTLECPGGMISIPHPKLKHVSKNHFYRASDSSSSMQQSRPIVVAKSPASRSSGEQ  
SAVSWRPRLDNVETVVVDVTTNFLTVTIKESSTDKGFFKDKR



MEELSAVGEQVFDAECILNRLRKGKLEFLVKWRGWSSKHNSWEPQANILDPRLLAAFNKSEQEKEIQICKRGKRPRG  
RPRKVVEVTPEVSKSSSSSSSSSSSGSSSSSSSSSSSDDDDDNNDRKAKPGPRTRELHPVPQKKAQIVVAKPEPPR  
KKRGRKALPAEMKAIQQNKGQRKI IKTVAKDSPTDLRGGITKPFHASF TFMGLNSRGP LSVQGRCSLAQGGTTKN SM  
NTAGSGRSNTSASLSFNRSNQS KSQLASDFKL SVSDVD SGAGLDLKT TASKSGVAVLN LHNSKLST SNGNPQGA FQPQ  
LGSHNGQKKPDAPGQTPLQQVPNNKPAS PFSTPKGPANQAASLQALNLQSVNKSTQGNIGPNGNTAPMSNLRSTANPA  
RKNTVGQYQGEQNFPVQSPATPGGQPRKNHSGVDKVAEETSEVGFTAERPERLTTRAQGRVEKSIVQNTSTEARDI  
LGKRERSASKDSGKQAKVLLSEMSTGEESTSDSDQDSPYPSNSQDLSISVQTGDQDWKPTHSLIEHFVFTDV TANLVTV  
TVKESPTS VGFFNIHNY

MEELSAVGEQVFDAECILNKLRLRGKLEFLVKWRGWSSKHNSEWPQANILDPRLLAAFNKSEQEKEILICKRGKRPRG  
RPRKVVETVPEVSKSSSSSSSSSSSSSSSSSSSSSSSSSDEDDDDNNDRAKAKPGPRTRELHPVPQKKAQIVVAKPEPPR  
KKRGRKALPAEMKAIQQNKGQRKI IKTVAKDSPADLRGGIKKPFHPASF TFMGLNSRGPLSVQGRCSLAQGGTTKNSM  
NTAASGRSNTLASLSFNQRSNQSKSQASDFKLSVSEVDSGAGLDLKT TASKSPGVAALNLHNSKLSSTNSNLQGAQFP  
QLGSHNGQKKPDAPGQTPVQQVPNNKTAAPFSTPKGPANQAASLQALNLQSVNKSQTQNGTTPGNGTAPVSNLRSTANP  
ARKDTVGQYGLEKNPVQSPATPGGQPRKNHPGVDKVKAEEVSETGVMTERPERLTTTRAQGRVEKSIQNPNSAEARD  
ILGKRERSASLGSCKQAKVLLSEMSTGEESTSDSDQDSPYPSNSQDLISVQTGQDWKPTHSLIEHVFVTDVTANLVT  
VTVKESPTSVGFFNIHNY

MEGVTVGQVFDAECILNKRPRKGKFEYLVKWRGWSSKHNWEPEENILDPRLMAAFHKRELERELLFGKRGKRPGRPRKILEPEPTETKSDQSSASSSSGLSSSPSASSEDEDHGKKAKPGPRRLNLHPVLQMRPHIVVANQEPVRKKRGRKPLLPFLRALRQANTRLPLPPPLSRHHQVLRPPPREPPKKEPRGGVKKPLQFASFTYTSLSASRSSRDETAPQRAAGGAFFQAGASKPGLLNSIWSGRSMSTITPSSPSSSSSLSRPPPHSKGLSDLKHSLSVSDAGNSSGRAEGLKVASSVKPGVSTSTSLVLHSSKTTSSGFGGSPAACSPAQRSPAGQRRQQEGPGSQAVVVVQQQGAKPSSSPPSARDRISQALSLRALNLQSVNKRAPGNGLQGYGTSGTTGVAVSRSSLRSGACQAGKGAGGIIKEMHTSSGLDQSLASGGLGAGMLRSGSIPQAGEERGERGKTTGAETEREMDSKRPRGVSGNGRLRGGSVQGGVSSAGGGGSSAAREEDRRSEQSLNERNRSRVENSRTLNELSTGDS EDTSSSESEEPDSSYPNNNGPRLVSMETETEDWRPALSLLEHVFTVDVTANFVTVTVKESPTSVGFFNI

MEGVTVGHVFDAECILNKRPRKGKFEYLVKWRGWSSKHSWEPEENILDPRLLAHFHKAQERELLFRKRGKRPRGRPRKILEPEPTETKSDRSSSSSSSSGLSSPSSSSSEEEEEEDHRKKAKPGPRLRLNLYPVPQKRPQIVVAKNEPVRKKRGRKPLLPELRALRQAKTRPPLPPSPSRHQQVLRPPREPFFKEEPRGGVKKPLQPASFTYTGSSSRGSRDEVAHQVAA  
GGAFYQAGASKPGPLNSIWGRSMSTNTPTPSSPSSSSSLRPPPPYSKGWSDLKRLSVSDAGSSNGRAEGFKVASS  
LKPGMSTSTLCLHSSKTSSGCGGSLTACSPAQRFPAGQRRQQEGPGGGQAGMVVQQQGAKPSSSTPPSARDRISQALSL  
RALNLQSVKRIAPGNGLQGNGTSGTTGVAVSRLSLRSSASPAGKRAGGSIKETHTSSGLNQLVSGGLGGGALHSGSV  
TPARVERGERGKDTGAETEREMDNKPGGGVGRGNRVEKGGSVQAQGGVSTARRGRANGGRQEDRKSQSLTVNERN  
RSGDNRSTLNLSTGSDSDTSSSEEECDSPYPDNNRRLVSMEMETETDWRPARSLLEHVFTVDVTANFVTVTVKE  
SPTS VGFFNVRNH

MELPAAGEHVFVAVESIEKKRNRKGRMEYLVKWRGWSPKYNTWEPEENILDPRLLDAFQNRREYEQLMGYRKRGPKPKH  
LMGQVPSFARRSSVLSGLQETTLDEDNRQQVDPIQTVRSQTQQYQLNSKKHHQYQPLLAKEREAEQQANGKKLYYQL  
NSKKHHHYQPDPKMYDSTQCMKPREATKAPELPTNHSWNLPPALQQKWVRDKDSGCLSKVKDITMELKKLPAHLNGPS  
GESEQSKATAKEDAPLLEADSVD SKLKIVKNKNKNGRIVIVMSKYMENGMQAARIKNGDVETLDEPQPDNDDDAAEN  
QLEKMRLVQKLGLTNGFAKDCNKGSNRSNVFKCPADKVDSPKMGLSATEQNKHFNVRVQKEATEDQPLQLTNKPNLAP  
WNIEMGVHRTQPGKGSSPALKRHLSEADKGEDRGCKQFLNSRSISIPCTVSSPPQSNSTDQNGHSHSHNGQRDYDFLE  
SPQDEPMDLSCVRSRREAPVPTETQVAPSAEEETAEQTKPPLAITTEQTVEEEFPFSPKPFGLGNIVITDITTNCLTV  
TFKEYVTV

MELPAAAGEHVFAVESIEKKRRNRKGRMEYLVKWRGWSPKYNTWEPEENILDPRLLDAFQNRREYEQLMGYRKRGPKPKH  
MIAQVPSFARRSSVLSGLQETTLDEENRQKVDPIQTLRSQTQQYQLNSKKHHQYQPLLAKEREAEQQANGKKKLYYQL  
NSKKHHHYQPDPKMYDSTQCMKPREATKAPELPTNHNWNLPALQQKWVRDKDSGCLSKVKDITMELKKLPAHLNDHS  
GESEQSKATAKEDAPLLKANGVSDSKLKIVKNKNKNGRIVIVMSKYMENGMQAARIKNGDVETLDEPQPDNDDDAAEN  
QLEKMRLVQKLGLTNGFAKDCNKDVKLHVLNSGSGNSNVFKCPAEKVDSPKMELSATEQPLRLTTKPNLAPWPFEMGV  
HRTQPVNNGSSPAFKRHLSEADKGEDRGCKRFLNSRSISAPCTVSSPPQSNMSMDQNGHSHNGHQDYDFLESNQDEP  
MDLSCVRSKREAPVPTETQVAPSABEEKTAEQTKPPLAITTEQTKPPLAITTEHTVEEEFPFSFKPFLGNIVITDITT  
NCLTVTFKEYVTV

MELPAAGEHVFAVEGIEKKRIRKGKIEYLVKWRGWSPKYNTWEPEENILDPRLLVAFQNRREQEQLMGYRKRGPKPKHLLVQLPSFARRSSIPAGFEETSPEAENYLRS DPIQTHR SQPQQYQLNSKKHHQYQPSKQEV SADQLGNGKKKLFYQLNSKKHHHYQPDPNMYNTQSTRPKDMVKQGEPSPTPNPNPGWNLPPALQKWVRDKNTGCLSKVKDVTVEMKKA AVRVEAESECALPKSPKEAALPSAVSSKMKI IKNNKNKGRIVIVMSKYMDGNKAGAAKGKHS DLTGEEKPKQHAEQSDMSKVGOTTNPKEICNASSTPAAEHPKKRSPEDGHFSKPSSTAEYNTVEARGAADLPDDHFLQLTNTNPSTPSWAMDTSLE

TPSPMDQTRTLPTTNNDRKRKLSHPPEEDRGVCKTFLSSRSISVPSAVPTPPQDKPMDLHLIVPRSSSSSGYGYEITDT  
SISQEEPMDLSCSRTRKQPEPEPEPEPEHKDPTAVVQESSETTTTTTTTATTTTTEEAKESVL**MFSPFMGNIVITDITT**  
**NCLTVTFKEYVSV**

>Omy\_LOC110486808

ELPAAGEH**VFAVEGIEKKRIRKGI EYL VKWKGWSPKYNTWEPEENILDPRLLVAFQNRER**QEQLMGYRKRGPKPKHL  
LVQLPSFARRSSIPAGFEETSPEAENYLRS DPIQTHR SQPQQYQLNSKKHHQYQPSKQEV SADQLGNGKKKLFYQLNS  
KKHHHYQPDNMYNTQSTRPKDMVKGQEPSPTNPNGWNLPPALQQKWVRDKNTGCLSKVKDVTVVEMKKA AAVRVNE  
AESECALKPSPKEAALPSAVSSMKI IKNNKNNGRIVIVMSKYM DGNKAGAAKGKHS S DLTGEEKPQHAEQSDMSKVQ  
GTTNVPKEICNASSTPAAEHPKKRSPEDGHFSKPS PSTAE EYNT EVARGQADLPDDHPLQLTTNPTPSPWAMDTSLPT  
PSFMDQTRTLPTTNNDRKRKLSHPPEEDRGACKTFLSSRSISVPSAVPTPPQDKPMDLHLIVPRSSSSSGYGYEITDTS  
ISQEEPMDLSCSRTRKQPEPEPEPEPEHKDPTAVVQESSETTTTTTTTATTTTTEEAKESVL**MFSPFMGNIVITDITT**  
**CLTVTFKEYVSV**

>Omy\_Cbx6 (Gene ID: 110485591)

MELSAVGER**VFAAEAILKRRVRKSRLEYLVKWKGWALKHSTWEPEENILDDRILIAGFEQKER**ERELHGPKKRGPKPKN  
LPAKARGAQKRETSTPRAHDRLIAGFEQKERERELHGPKKRGPKPKNLPKARGAQKRETSTPRAPRSTSSSSPRAPP  
SSFPSASPAPSPKLNLSLAATHKLLKDIRRCTSMSRRPLRPDPPLASPGSFSGSSGFPSPRPVSPFSETVRILNRRVKP  
REVKRGRILNLKVIDKPGSGGGGRGGGNNRAPSGMSLQGGQRNIPSRNRIIGKRSGEAPYRPFQPMLGFPMYGKP  
FGLQCGGPGPLHLPHSATGSSTGTSGARDTQPPSPSSSSSGSTTPAQNHPTPPGPATGASASGSAPNLSTQALASSAQ  
STPSHPPELQKNQNAEQGNPLLP SLSFASGSSSSSFDEEEDDADALDLSSPQEGKRKLRRRRRQKRQPPSVSTASPP  
HPPAARACPLTSNPQRVPAEGD**PDWHPPEMVASSANVVVDVTNNLLTVTIKEFPSP**SSRPSSPQPIHPENTTSSSPQL  
KNPPQPKP

>Omy\_LOC110536509\*

MELSAVGER**VFAAEAILKRRVRKSRLEYLVKWKGWALKHSTWEPEENILDDRILIAGFEQKER**ERELHGPKKRGPKPKN  
LPAKARGAQKRETSTPRAPRSTSSSSPRAPPSSFPSASPYISPSPSLASTALFCSLLSLLALLGIGGNLYTMGLLIRR  
RRGRRRRGCSSCCLGGRGVPLPSCLS SPS SPSSTSSSSTSLHLQVLSLALADLLYLFTAPFIVYDSL AADWAF  
GELGCRLLFSLDLITLHASIYTLTAMSLDRYAVANPLATSSSPSSGLLRVALAWGLAVALSLPMMITLHLEDGDDGQ  
LCVPWADQESSKVYMSVLFCTSMIGPLAIGALYATLGRLYWVSQTQPWASGSGGSTSYPPRPRPKVLLLLILGIVLA  
FWACFLPFWVWQLPLRYRPMRLTVVPVGTQVTVNRILTGLTYGNSCVNPFYTLTGGKRRNRNQPTPTSANQLCRKSS  
PQ

>Omy\_LOC110538378

MELSSIGE**QVFAVESITKKRVRKGNVEYLLKWKQGWPPNTLTGELATTVRHLVHFRNVKSPSRSSVNPIPHASKTEGYS**  
**TWEPEDHILDPRVLAYEEKEE**KDRALAYRRKGLRPRRLVLRSSLLQNIYAMDLSAHKVPDTPRLRLSLTRSMGSE  
LDQGS LYPYRAGEGGSVYRRLARRKNKQRVSKPVSDNNSLQPLTRI QDPMHEHWQGAERPESELTTDTRENHRHSEC  
SSPMMEQEVEEPTDRVESC GSALGSGDET LGG GALLRV TGAWYRSEGR TSETGQE QIDRTDQSESCVSAEGPKDNISN  
RLVDSATEVELGTDTLIDKVERLGTDNVIERVEGLGTDYFIDRVEEMGGHILIDRDSTS VVDVGDETVADGSVVC TDV  
EVAEEVVENDTKQQGEEVVT**QCPDSSGAEVNPGKIVIVDVTINS LTVTFKEALAA**EGFFKS

>Omy\_LOC110486408

MELSSIGE**QVFAVESITKKRVRKGNVEYLLKWKQGWPPNTLTGELATTVRHLVHFRNVKSPSRSSVNPIPHASKTEGYS**  
**TWEPEDHILDPRVLAYEEKEE**KDRALAYRRKGLRPRRLVLRSSLLQNIYAMDLSAHKVPDTPRLRLSLTRSMGSE  
LDQGS LYPYRAGEGGSVYRRLARRKNKQRVSKPVSDNNSLQPLTRI QDPMHEHWQGAERPESELTTDTRENHFRHRSR  
SECSYPMMEQEVES TDRVESC GSTLGSGDET LGG GALLRV TGAGYRSEGGTSETGQE QMDRTDQSESCGSAEGPEDL  
NISNRLVDSATEVELGTDTLIDRVERLGTANA IERVEGLGTDYFIDRVE MGTHILIDRDSTS VVDVGDETMADGSVVC  
TDVEVAEEVVENDTKQQGEEVVT**QCPDSSGAEVNPGKIVIVTYVTINS LTVTFKEALAA**EGFFKS

>Omy\_LOC110499099

MELSAIGE**QVFAVESI IKKRVKGNVEYLLKWKGWPPKYSTWEPEEHILDQRLVQTYDEKEQ**KDRALGYRKRGPKAKR  
LLLQNTIYNMDLSAHKALEKPPARLRLSLTRSLESEAEDPTYGACRRSLHPRLAHRKNKPRRSQFMCLASPPGPPNP  
TKVPTHDDWGRREEEDDMEEEEETRQE QSERETEICSGILNGQDRAEDWSSVIGSDEVTASERS**AVWSPVIGPGEVTV**  
**TDVTINS LTVTFKEALAA**KGFFRGWGLEF

>Omy\_LOC110502860

MELSAIGE**QVFAVESI IKKRVKGNVEYLLKWKGWPPKYSTWEPEEHILDQRLVQAYEEKDQ**KDRALGYRKRGPKAKR  
LLLQNTIYTMDLRSAHKAPEKHPARLRLSLTRS LDSEAEDPTYGACRRSLHPLDHHKNKPRRSQFVRLASPPGPPTP  
TQDP THEDWGRREEE DEEEEARQDESERETEMSSGILNGQNAEDWSSVIGSEEVTVSERS**DVWNVPVIGPGEVTVTDV**  
**TINS LTVTFREALAA**KGFFRGWGLEF

>Omy\_Cbx8 (Gene ID: 110485969)

MELSAVGER**VFAAEI IKRIRRG RMEYLVKWKGWSPKFSTWEPEENILDSRLFVAFEEERER**ERELFGPKKRGPKPKT  
FLLKAQAKAKAKLYEFRSDAVRGIRVITYPTPEPVITPRAREGLRAVVPTIFPPSTVNRGESVRVRPPEPVREHRQPV  
LRPPGPDG FVIVPKKRGPKPKLRFKDNPFNAPPAALSPPKRAEEQATYGPLKLAKLGLSGGEERGSEMRGIKLAHRH



>Oki\_LOC109899149

MEGVTVGQVFDAECILNKRPRKGF EYLVKWRGWSSKHN SWEPEENILDPRLMAAFHKREQERELLFGKRGKRPRGRF  
RKILEF EPTETKSDRSSSASSSSGLSSSPASSSEDEDHGKKAKPGPRRLNLHPVLQTRPHIVVANQEPVQKRRGRKPL  
LPFLRALRQANTRLPPLPPPLSRHHQVLRPPPREPPKEEPRGGVKKPLQPASFTYTSLSASRGSRDETASQRAAGGAFF  
QAGASKPGMLNSIWSGRSMSTITPSSPSSSSSLSRPPPHSKGLSDLKRSLSVSDAGNSSGRAEGLKVASSVKPGVST  
LTSGLGHSSKTSSGFGGSPAACSPAQRSPAVQRRQQEGPGSQAVVVVQQQAKPSSSPPPSARDRISQALSLRALNLQ  
SVNKRAPGNGLQGYGTSGTTGIAVSRSSLRSGASQAGKGAGGI IKEMHTSSGLDQSLASGGLGAGMLRSGSIPQAREE  
RGKTTGAETEREMDSKGPRGVGSGNGRLERGGSVQGGVSSAGGGSSAAREEDRRSEQSLNERNRSRVENSRTLNELS  
TGSDSDTSSSESEEPDSSPYPNNGPRLVSMETEIE TDWRPALSLLEHVFTVDVTANFVTVTVKESPTS VGFFNVRNP

>Oki\_Cbx4 (Gene ID: 109865985)

MELPAAAGEHVFAVESIEKKRNRKGRMEYLVKWRGWSPKYNTWEPEENILDPRLLDAFQNRERYEQLMGYRKRGPKPKH  
LMGQVPSFARRSSVLSGLQETTLDEENRQQVDPIQTQYQVLSKSKHHQYQPLLAKEREAEQQANGKKKLYYQL  
NSKKHHHYQPDPKMYDSTQCMKPREATKAPELPTNHSWNLPALQQKWVRDKDSGCLSKVKDITMELKKLPAHLNGPS  
GESEQSKATAKEDAPLLEADGVSDSKLKIVKNKNKNGRIVIVMSKYMENGMQAARIKNGDVETLGEPPQDNNDAAEN  
QLEKMRLVQKLGLTNGFAKDCNKGSNRSNEFKCPADKVDSPKMGLSATEQNKHFNVDRDQKEATEDQPLQLTNKPSLAP  
WPIEMGVHRTQPGKGSSLALKRHLSEADKGEDRGCKQFLNSRSISIPCTVSSPPQSNSTDQNGHSHNGQQDYDFLE  
SNQDEPMDLSCVRSRREAPVPTETQVAPSAEEETAEQTEPPLAITTEQTVEEE PFPSPKPFGLGNIVITDITTNCLTV  
TFKEYVTV

>Oki\_LOC109894654

MELPAAAGEHVFAVESIEKKRNRKGRMEYLVKWRGWSPKYNTWEPEENILDPRLLDAFQNRERYEQLMGYRKRGPKPKH  
LIGQVPSFARRSSVLSGLQETTLDEENRQKVDPIQTQYQVLSKSKHHQYQPLLAKEREAEQQANGKKKLYYQLNSKKH  
HHYQPDPKMYDSTQCMKPREATKAPELPTNHSWNLPALQQKWVRDKDSGCLSKVKDITMELKKLPAHLNDHSGKSEQ  
SKATAKEDAPLLKANDVSDSKLKIVKNKNKNGRIVIVMSKYMENGMQAARIKNGDVETLDEPPQDNDDAAENQLEKM  
RLVQKLGLTNGFAKDCNKDVKLHSLNSGNSGNSNVFKCPAEKVDSPKMELSATEQPLRLTTKPNLAPWPFEMGVHRTQ  
PVNGSSPAFKRHLSEADKDEDRGGCKRFLNSRSISAPCTVSSPPQSNMMDQNGHSHNGHQDYDFLESNQDEPMDLSC  
VRSKREAPVPTETQVAPSAEEETAEQTKPPLAITTEQTKPPLAITTEHTVEEE PFPSPKPFGLGNIVITDITTNCLTV  
TFKEYVTV

>Oki\_LOC109887742

MELPAAAGEHVFAVESIEKKRNRKGRMEYLVKWRGWSPKYNTWEPEENILDPRLLDAFQNRERYEQLMGYRKRGPKPKH  
LIGQVPSFARRSSVLSGLQETTLDEENRQKVDPIQTQYQVLSKSKHHQYQPLLAKEREAEQQANGKKKLYYQLNSKKH  
HHYQPDPKMYDSTQCMKPREATKAPELPTNHSWNLPALQQKWVRDKDSGCLSKVKDITMELKKLPAHLNDHSGKSEQ  
SKATAKEDAPLLKANDVSDSKLKIVKNKNKNGRIVIVMSKYMENGMQAARIKNGDVETLDEPPQDNDDAAENQLEKM  
RLVQKLGLTNGFAKDCNKDVKLHSLNSGNSGNSNVFKCPAEKVDSPKMELSATEQPLRLTTKPNLAPWPFEMGVHRTQ  
PVNGSSPAFKRHLSEADKDEDRGGCKRFLNSRSISAPCTVSSPPQSNMMDQNGHSHNGHQDYDFLESNQDEPMDLSC  
VRSKREAPVPTETQVAPSAEEETAEQTKPPLAITTEQTKPPLAITTEHTVEEE PFPSPKPFGLGNIVITDITTNCLTV  
TFKEYVTV

>Oki\_LOC109882827

MELPAAAGEHVFAVEGIEKKRIRKGI EYLVKWRGWSPKYNTWEPEENILDPRLLVAFQNRERYEQLMGYRKRGPKPKH  
LLVQLPSFARRSSIPAGFEETSPEAENHLRSDPIQMHRSQPQYQVLSKSKHHQYQPSKQEVSAQDLGNGKKKLFYQLN  
SKKHHHPGAPXPXYVQPQSTRPKDMVGQEPSPPTNPNPGWNLPPALQQKWVRDKNTGCLSKVKDVTXDEKAVVRV  
NEAESECALKPSPKEAALPSAVSSKMKTSRTRTRMDALSSMPAAEHPPKKHSPEDGHFSKPSPTAEYNTEDKPMDL  
LHLIVPRSSSSSGYGEITDSTSTSQEFPMDLSCSRTRKQPEPEPVPEPEPEHKDPTAVVQESETTTTTTTTATTTEE  
TKEESVLMLSPFMGNIVITDITTNCLTVTFKEYVSV

>Oki\_Cbx6 (Gene ID: 109884207)

MELSAVGERVFAAEAILKRRIRKSRL EYLVKWKGWALKHSTWEPEENILDDRLIAGFEQKERERELHGPKKRGPKPKH  
LPAKARGAQKRETSTPRAPRSTSSSSPRAPPSSFPASPAPT PKLNSLAATHKLKDIRRCTSMSRRPLRPDPPLASP  
GSFSGSSGFPSPRPVSPFSETVRI LNRRVKPREVKRGRI ILNLKVIDKPGSGGGGRGGGNRRAPSGMSLQGGQRNI  
PSRNRIIGKRSGEAPYRPFQPMLGFPYGKPFGLQCGGPGXLHLP HSATGSSTGTSGARDTQPPSPSSSSSGSTTPAQ  
NHPTPPGPATGAXGAPNLSTQASASSAQSTPSHPP ELQKNQNAEQGNPLLP SLSFASGSSSSSFDEEEDDADALDL  
SAPQEGKRKLRRRRRQKRQPPSVSTASPPHPAAASSCPLTSNPQRVPAEGD PDWHPEKVASSANVVVTDVTNLLTVT  
IKEFPSPSSRPSPQPIHPENTTSSPQLKNPPQPKP

>Oki\_Cbx7 (Gene ID: 109899160)

MELSAIGE QVFAVESI IKKRVKKGKVEYLLKWKGWPPKYSTWEPEEHILDQRLVQAYEEKDQKDRALGYRKRGPKAKR  
LLLQNTIYTMDLRSAHKAPEKPPARIRLSLTRSLDSEADPTYGACRRSLHPLHDHKNKPRRSQFVRLASPPGPPTP  
TQDP THE DWGTREEDEEEDMEEEEARQDESERETEMSCGILNGQNRAEDWSSVIGSEEVTVSERS DVWNVPVIGPGEV  
TVTDVTVINSLTVTTFREALAAKGFFRGWGLEF

>Oki\_LOC109898530

MELSSIGE QVFAVESITKKRVRKGNVEYLLKWKQGWPPKYSTWEPEDHILDPRVLVAYEEKEEKDRALAYRRKGLRPRR  
LVLRSSLLLQNIYAMDLRSAHKVPDTPRLRLSLTRMSGELDQGS LPYRAGEGGS IYPRLARRKNKQRVSKPVSDNNS  
LQPLTRI QDPMHEHWQGAERPESELTTDTRHSRSECSYPMMEQEVESTPDRVESCGSTLGSGDET LGGALLRVTV  
GYRSEGGTSETGQEQMDRTDQSESCVSAEGPEDLNISNRLVDSDEVELGTDTLIDRVERLGTANA IERVEGLGTDYF

IDRVEEMGTHILIDRDSTSVVDVGDETVADGSVVCTDVEVAEEVVENDTKQQGEEVV  
TQCPNSSGAEVNPGKIVITVY  
TINSLTVTFKEALAAEGFFKS

```
>Ok! LOC109870400
```

MELSAIGEQVFVESIIKKRVRKGNVEYLLKWKGWPPKYSTWEPEEHILDQRLVQTYDEKEQKDRALGYRKRGPKAKR  
LLQNTIYNMDLRS AHKALEKPPARLRLSLTRSLESEADPTYGACRRSLHPRLAHRKNKPRRSQFMCLASPPGPPNP  
TKVPTHDDWGRREEEDDMEEEEETRQEQSERETEICSGILNGQDRAEDWSSVIGSDEVTASERSAVWSPVIGPGEVTV  
TDVTINSLT VTFKEALAAKGFFRGWGLEF

```
>Ok! LOC109889501
```

MELSAVGERVFAAESIIKRRIIRGRMEYLVKWKGWSPKFSTWEPEENILDSRLFVAFEEREREELFGPKKRGPKPKPT  
FLLKAQAKAKSYEFERSDAVRGIRVITYPTPEPVITPRAREGLRAVVPITIFPPSTVNRGESVVRVRPPEPVREHRQPVLQR  
PPGPDGFIIVIPKKRGPKPKLRFKDNPFNATSAATEPHKRAEEQATYSPLKLAKLGLSDGEERGSEMGRGIKLAQRQV  
ELGGYPHKQMRPVASGSTQQHYKPDRLGLLHSHRIGSDSQACRTCEPSNYLSPQLKHLSSKNVHQPSEELPQRGKPS  
LIAKIPVSRILGQTDEVTWKPCMNNVEKVLVTDVTFNTFLVTIRESSTDQGFFKDKR

>Ok! LOC109882830

MELSAVGERVFAAESIIKQRIIRGRMEYLVKWKGSWKYSTWEPEENILDARLFAAFEERERERELFGPKKRGPKPET  
FLLKAKAKATAKTYECRREMPRGIRVSYVPVPMPTTPRAREGLRAVVPTIFPPSTVNRGESVVRVRLPETERRLRPAPP  
LPFMAEEFVNI PKKRRGLPKKLRLFNMFEDSCPTTEEPAKRSRLLEEQQVPYGLSKMSRHKHHEGETSKRSVIQLTRRFQ  
EGTSIVPKSNKAQRLLGTVSHPGTHSHDGRLVHKA RLDQQSRRTLECFGMSVPHPKLHVSKNHFYRASDSSSSMQQ  
SRPIVAKSPASRSSGEQSAVSWRPLDNLVEKVVVDVDTTNFLTIVTIKESSTDKGFFKDNK

Ok! LOC109882828\*

MSPT<sup>−</sup>PRLI<sup>−</sup>FMYV<sup>−</sup>FL<sup>−</sup>CLW<sup>−</sup>SPSAAD<sup>−</sup>LCNWSG<sup>−</sup>SLAREAEAN<sup>−</sup>SRTV<sup>−</sup>VQ<sup>−</sup>QVRL<sup>−</sup>RCTEGS<sup>−</sup>VEWV<sup>−</sup>YPGQ<sup>−</sup>ALRV<sup>−</sup>VLEPN<sup>−</sup>LSARH<sup>−</sup>  
TTVCIK<sup>−</sup>PF<sup>−</sup>RSFNGAS<sup>−</sup>VYIERAGEL<sup>−</sup>DL<sup>−</sup>LM<sup>−</sup>TGGR<sup>−</sup>PEQV<sup>−</sup>FCFPAD<sup>−</sup>GPQK<sup>−</sup>PAIF<sup>−</sup>LLAN<sup>−</sup>PQRDI<sup>−</sup>SQRAV<sup>−</sup>GFRYELL<sup>−</sup>GNQTTA<sup>−</sup>  
PNLGRSVL<sup>−</sup>QASCRPCNDTELLLAICSSDFVVRGSI<sup>−</sup>RNVSHNAERQ<sup>−</sup>TSLVEVSDGRVYRQ<sup>−</sup>SGVFERHTGTIGVPGSSS<sup>−</sup>  
SWHGH<sup>−</sup>IHTLLQCHVKPGGGEFL<sup>−</sup>TGTEHFG<sup>−</sup>EAWLGCAPRYKDFMSLYQSAWVARQNPCEFLD<sup>−</sup>

Oki LOC109866077

MELSAVGERVFAAESIKRRIRRRGRMEYLVKWKGWSPKFSTWEPEENILDSRLFVAFEERERERELFGPKKRGPKPKPT  
FLKQAQAKAKAKSYEFRSDAVRGIRVTTYPTPEPVITPRAREGLRAVVPTIFPPSTVNRGESVVRVRPPEPIREHRQPVL  
QRPGRPDGFIIVPKKRGPKPKLRFDKDNFPNAPPAALSPPKRAEEQATYQPKLKLAKLGLSGGEERGSEMRGIKLAHRH  
QEELGGYPHKQIRPVASGSTQQHCGPDRGMLHSHRIGSDQACRTKECFNSYLPSPQLKLSKKNVHQPSEELPQRGK  
PSLIAKIPVSRILGOTDEVTKPKCLNNVEKVLVDTTNTFLTITRESSTDGGFFKDKR

```
>Sal LOC111977406
```

MEGVTVGQVFDACILNKRPRKGFEYLVKWRGWSSKHSWEPEENILDPRLMAAFHKREQERELFLGKRGKPRGRGRKILEPEPTETKSDRSSSSSSSSGLSSSPSASSSEEEDEDHGKKAKPGPRRRNLNLQPVLQTRPHIVVANQEPPIRKKRGKPLLPRLRALRQANIRPPLPPPLSRHHQVLRPPPREPPKKEPRGGVKKPLQPASFYTSLSASRGSRDETAPQRAAGGAFFQAGASKPGPLNSIWSGRSMTITPSSPSSSSLSRPPPPHSGKLSDLKRSLSVSDAGNSSGRAEGLKVAFSVKPGVSTSTSLGLHSSKTSSTSGFGGSPAACSPAQRSPAGQRRQQEGPGSQAVVVVQQQGAKPSSSPPLSARDRISQALSLRALNLQSVNKRAPGNGLQGYGTSGTTGVAVSRSSLRSGASQAGKGAGGSIKEMHTSSGLDQSLASGGLGAGVLRSGCIPQAREERGERGKTTGAETEREMDSKGPBGVSGNGRLRERGGSAQGGMSSAGGGGSSAAREEDRRSEQSLNERNRSRSIENRTLNELSTGSDDTSSSESEEPDSSPYPNNGPRLVSMETEMETDWRPALSLLEHVFTDVTANFVTVTVKESPTSVGFNVRNP

```
>Sal LOC112077672
```

MEGVTVGHVFDAECILNKRPRKGKFEYLVKWRGWSSKHSNWEPEENILDPRLLAAPHKRAQERELLFRKRGKRPGRGR  
RKILEPEPTETKSDRSSSSSSSSGLSSSPSASSEEEDEDHGKKAKPGPRRRNLNLQPVLTQTRPHIVVANQEFIRKKRG  
RKPLLELRLALRQAKTRPPLPPSPSRHHQVLRPPREFPKEEPRGGVKKPLQPASFTYTLGLSSSRGSRDEVAHQVAAG  
GAFYQAGVSKPGPLNSIWSGRSMTNTPTPSSPSSSSSLSRPLPSYSGKWSDLKRSLSVSDAGSSNGRAEGLKVASSL  
KPGVSTSTSLCLHSSKTSSGCGGSPTACSPAQRFPAGQRRQQEGLGGQAGMVVQQQGAKPSSSTPPSARDRISQALS  
RALNLQSVKKIAPCNGLHGNGTSGTTGVAVSRLSLRSSASPAGKRAGGSIKETHTTSTGLNQGLVSGGLGGGALHSGSV  
PPARVERGERGELKTVGVETEREMDNKPGGGVGRGNRVEKGGSVQAQGGVSTARRGRANGGRQEDRKSQSLSLTVNERN  
RSGDNSRTNLSTGSDSDTSSSEEECDSSPYPDNNNRARLVSMEMETE TDRPARSLLHHVFVTDVTANFVTVTVK  
ESPTSVGGFFNVRNH

```
>Sal LOC112073971
```

[illegible]





GTSETGQEQMDRDTQSESCVSAEGPKYLNISNRLVDSATEVELGTDTLIDKVERLGTANAIIERVEGLGTDYFIDRVEE  
MGTHILIDRDSTSVVDVGDETVSDGSVVCTDVEVAEEVVENDTKQQGEEVVTQCPDSSSGTEVNPQKVIVTDVNTNSLT  
VTFKEALAAEGFFKG

>Hhu\_Cbx4 (ENSHHUG00000045583)  
MELPAAAGEHVFAVEGIEKKRIRKGI EYLVKWRGWSPKYNTWEPEENILDPRLLVAFQNRERQEQLMGYRKRGPKPKH  
LLVQLPSFARRSSIPAGFEETSPEAENHLKSDPIQMHRSQPQQYQLNSKKHHQYQPSKQEV PADQLGNGKKKLFYQLN  
SKKHHHYQPDPMYNTQSARPKDVVKGOEPSPTNPNPGWNLPPALQQKWVRDKNTGCLSKVKDVTVEMKKAARVN  
EAESECALKPSPEALPSAVSSMKMIKKNKNNGRIVIVMSKYMMDGNKAGAAKGKHSDDL TGECKPQHAEQSDMTKV  
QGTNVPKEICNASSPPAAEHPKKRSAEDGHFSKSPSTAE EYNTAVARGQADLPDDHPLQLTTNPTPSWAMDTSLP  
TPSPMDQIRTLPTTNNDRKRKLSHPEDRGACKRFLSSRSNSVPSAVPTPPQDKPMDLHLIVPRSSSSSGYGYEVTDT  
STNQEEPMDLSCSRTRKQPEPEPVPEPEPEPKDPTAVVQESVTTTMTTTTAATTTEEAEEE PVLKFSPFMGNIVITDI  
TTNCLTVTFKEYVSV

>Hhu\_ENSHHUG00000007216  
MELPAAAGEHVFAVEGIEKKRIRKVKLLTNAHFNSVELNSNVIGFLT KSLSFSFLLQKIEYLVKWRGWSPKYNTWEPE  
ENILDPRLLVAFQNRERQEQLMGYRKRGPKPKHLLVQLPSFARRSSIPAGFEETSPEAENHLRSDPIQMHRSQPQQYQ  
LNSKKHHQYQPSKQEV PADQLGNGKKKLFYQLNSKKHHHYQPDPMYNTQSARSKDVVKGOEPSPTNPNPGWNLPPA  
LQQKWVRDKNTGCLSKVKDVTVEMKKSARVRNEAESECALKPSPEALPSAVSSMKMIKKNKNNGRIVIVMSKYM  
DGNKAGAAKGKHSDDL TGECKPQHTEQSDMTKVQATTNVPKEICNASSPPAAEHPKKRSPEDGHFSKSPSTAE EYNT  
EVARGQADLPDDHPLQLTTNPTTSPWAMDTSLPTSPMDQIRTLPTTNNDRKRKLSHPEDRGACKRFLSSRSISVPS  
AVPTPPQDKPMDLHLIVPRSSSSSGYGYEVTDTSTNQEEPMDLSCSRTRKQPEPEPVPEPEPEPEPKDPTAVVQES  
VTTTTTTTIATTTEEAEEE PVLKFSPFMGNIVITDITTNCLTVTFKEYVSV

>Hhu\_ENSHHUG00000045521  
MELPAAAGEHVFAVESIEKKRNRKGRMEYLVKWRGWSPKYNTWEPEENILDPRLLD AFQNRERYEQLMGYRKRGPKPKH  
LMGQVPSFARRSSVLSGLQETTLEDENQQKVDPIQTVR SQTQQYQLNSKKHHQYQPLLAKERAEQQANGKKKLYYQL  
NSKKHHHYQPDPMYDSTQCMKPREATKAPELPTNH SWNLPPALQQKWVRDKDSGCLSKVKDITMELKKLPAHLNGHS  
GELEQSKATAKEANGVSDSKLKIVKNKNNGRIVIVMSKYMENGMQAARIKNGDVETLDELQPDNDDDAAENQLEKMR  
LVQKLGLTNGFAKDCNKGNSRNVFKCPADKVDSPKMELSATEQNKHFNVRGQKEATEDQPLQLTTKPNLGPWPFEMG  
VHRRTHPGNVSSPALKRHLSEADKGEDRGCKQFLNSRSISAPCTVSSPPQSNMHQNGHSHNGHQDYNFLESNQDE  
PMDLSCVRSRREAPVPTETQVAPAE EEEKTAEQTKPPLAITTEQTV EEE PFPSFKPFLGNIVITDITTNCLTVTFKEYV  
TV

>Hhu\_ENSHHUG00000050487  
MEYLVKWRGWSPKYNTWEPEENILDPRLLD AFQNRERYEQLMGYRKRGPKPKHLIGQVPSFARRSSVLSGLQETT VDE  
DNRQKVD SIQTILRSQTQQYQLNSKKHHQYQPLLAKERAEQQANGKKKLYYQLNSKKHHHYQPDPMYDSTQCMKP RE  
ATKAPELPTNH SWNLPPALQQKVRDKDSGCLSKVKDITMELKKLPAHLNDHSGNSEQSKATAKEDASMLKANDVSDS  
KLKIVKNKNNGRIVIVMSKYMENGMQAARIKNGDVETLDELQPDNDDDAAENQLEKMRLIQKLGLTNGFAKDCNKDV  
KLHVPNSGNSNVFKCPAEKVDSPKMELSATEQPLQLTTKPNLGPWPFEMGVHRRTQPRNGSSPALKRHLSEADKGEDRG  
GCKREFLNSRSISAPCTVSSPLPQSKMDQNGHSHNGHQDYDFLESNQDEPMDLSCVRSRREAPVPTETQVAPSA EEEK  
TAEQTKPPLAITTEHTVEEE PFPSFKPFLGNIVITDITTNCLTVTFKEYVTV

>Hhu\_Cbx6 (ENSHHUG00000007276)  
MELSAVGERVFAAEAILKRRVRKSRLEYLVKWKGWALKHSTWEPEENILDDR LIAGFEQKERERELHGPKKRGP KPN  
LPAKARGAQKRETSTTRAPRSTSSSPRAPPSSSHPSFPSSAPVPSPKLNSLAATHKLK KDIRRCTSMSRRPLPRSDP  
LASPGSFSGPSGFPSPRPVSPFSETVRILNRRVKPREVKRGRIILNLKVIDKPGSGGGGRGGGNRRVP SGMSLQGG  
RQNI PSRNRIIGRRGGEAPYRPFQPMLGFPMYKPFGLQCGGPRPLHLPHSATGSSTGTSGARDTQPPSPSSSSGST  
TPAPNHGPDAPATGTSASGSAPNMSAQASASSAQSTPSNPPELQKNQNAEQGNPPLLHSLSFASGSSSSSFDEEEE  
DADALDLSAPQEGKRKLRRRLQKRQPPSVSTASPPHPPAAGACPLTSNPQRVPAEGD PDWHPPEMVASSANVVVTDVT  
TNLLTVTIKEFPSPSSRPSSPQPIHPENTTTTTEEPPTTQAIGSD

>Hhu\_Cbx6a (ENSHHUG00000051753)  
MELSAVGERVFAAEAILKRRVRKSRLEYLVKWKGWALKHSTWEPEENILDDR LIAGFEQKERERELHGPKKRGP KPN  
LPAKARGAQKRETSTTRAPRSTSSSPRAPPSSSHPSFPSSAPAPSPKLNSLAATHKLK KDIRRCTSMSRRPLPRSDP  
LASPGSFSGPSGFPSPRPVSPFSETVRILNRRVKPREVKRGRIILNLKVIDKPGSGGGGRGGGNRRVP SGMSLQGG  
RQNI PSRNRIIGRRGGEAPYRPFQPMLGFPMYKPFGLQCGGPRPLHLPHSATGSSTGTSGARDTQPPSPSSSSGST  
TPASSHTPLGPEAQPATGASASGSAPNLSAQASASSAQSTPSNPPELQKNQNAEQGNPPLLHSLSFASGSSSSSFDE  
EEDHADALDLSAPQEGKRKLRRRLQKRQPPSVSTASPPHPPAAGACPLTSNPQRVPAEGD PDWHPPEMVASSANVVVTDVT  
DVTTNLLTVTIKEFPSSSCPSSPQPIHPENTTTTTEEPPTTQAIGRD

>Hhu\_ENSHHUG00000038356  
MELSSIGE QVFAVESITKKRVRKGNVEYLLKWQGWPPKYSTWEPEDHILD PRLVLAYEEKEEKDRALAYRRKGLRPRR  
LVLRKIYAMD LRS AHKVPDTPRLRLSLTRSMGSELDQGS LPYRAGEGGSVYRRLARRKNKQRVSKPVSDNNSLQPLTR  
IQDPMEHEWQGAEE RPESELTTETRHSRSECSSPMMEQEVESSTDRVESCGSALGSGDET LGGGALLRVTGAGDRSEG  
GTSETGQEQMDRTDQSESCVSAEGPKYLNINNRLVDSATELELGTDTLIDKVERLGAANVIERVEGLTDYFIDRVEE  
MGTHILIDRDSITSVDVGD ETVADGSV VCTDVEVAEEVVENDTKQQGEEVVT QCPDSSGADVNP GKVI VTDVTINSLT  
VTFKEALAAEGFFKG

>Hhu\_ENSHHUG00000052693  
MCGSYAVYLYVTP TGEQRTGRWIGGNVEYLLKWQGWPPKYSTWEPEDHILD PRLVLAYEEKEEKDRALAYRRKGLRP  
RRLVLRKIYAMD LRS AHKVPDTPRLRLSLTRSMGSELDQGS LPYRAGEGGSVYRRLARRKNKQRVSKPVSDNNSLQPL

TRIQDPMEHEWQGAERPESELTTETRHSRSECSSPMMEQEVEESTDRVESCGSALGSGDETLGGGALLRVTGGEDRS  
EGGTSETGQEQTDRDQSESCVSAEGPKYLNISNRLVDSATEVELGTDTLIDKVERLGAANVIERVEGLGTDYFIDRV  
EEMGTHILIDRDSTSVVDVGDETMADGSVVC TDVEVAEEVVENDTKQQGEEVVTQCPDSSGAENVPGKVI VTDVTINS  
LTVTFKEALAAEGFFKG

>Hhu\_Cbx7b (ENSHHUG00000042715)  
MELSAIGEQVFAVESI IKKRVRKGNVEYLLKWKGWPPKYSTWEPEEHILDQRLVQAYEEKEQKDRALGYRKRGP KAKR  
LLLQNTIYTMDLRS AHKAPEKPPARLRLSLTRS L DSEAEDPTFGACRRSLYPHLAHKNKPRKSQFVRLASPPGPPTPT  
QDPHTDWDGRREEEDEDMEEKEARQDESERETEMSSGILNGQNRAEDWSSVIGSEEVTVSERSDVWNPVIGPGEVTVT  
DVTINS LTVTFKEALAAKGFFRGWGLEF

>Hhu\_ENSHHUG00000046898  
MELSAIGEQVFAVESI IKKRVRKGNVEYLLKWKGWPPKYSTWEPEEHILDQRLVQAYDEKEQKDRALGYRKRGP KAKR  
LLLQNTIYNMDLRS AHKALEKPPARLRLSLTRS L ESEAEDPTYGACRRSLHPRLAHRKNKPRRSQFMCLATPPGPPNP  
TNDPTHDDWGRREEEDDMEEEEETRQE QSERETEICSGILNGQDRAEDWSSVIGSDEVNASERSAVWSPVIGPGEVTV  
TDVTINS LTVTFKEALAAKGFFRGWGLEF

>Hhu\_Cbx8a (ENSHHUG00000045580)  
MELSAVGERVFAAESI IKQIRRG RMEYFVKWKGSKKYSTWEPEENILDARLFAAFEERERERELFGPKKRGP K PET  
FLLKAKAKATAKTYECRREMPRGIRVSY PVLT PMITPRAREGLRAVVPTIFPPSTVNRGESVRVRPPETERRPQPAPP  
PSFMAQEFVNIPKKRGPKPKLRLRFNMEPDSCPT EEPAKRSLLEEQQVPYGLSKMSRHCHHEGKTSERSVIQLTRRFQ  
EGTSIVPKSNNQRRVGT VSHSGTHSHDGRLVHKARLDHQSGTLECPGMSIPHPKLKHVSKKHFYRASDSSSMQQS  
RPIVVT KSPALRSSGEQSAVSWRPRLDNVEKVVVTDVTTNFLT VTIKESSTDKGFFKDKR

>Hhu\_ENSHHUG00000007201  
MELSAVGERVFAAESI IKQIRRG RMEYLVKWKGSKKYSTWEPEENILDARLFAAFEERERERELFGPKKRGP K PET  
FLLKAKAKATAKTYECRREMPRGICVSY PVTP MITPRAREGLRAVVPTIFPPSTVNRGESVRVRPPETERRPRPAPP  
PSFMAEEFVNIPKKRGPKPKLHLRFNMEPDSCPT EEPAKRSRL EEEQQVPYGLSKMSRHCHHEGKTSERSVIQLTRRFQ  
EGTSIVPKSNNQRRVGT VSHPGTHSHDGRLVHKARLDHQSRGTLKCPGAMSI PHPKLKHVSKKHFYRASDSSSMQQ  
SRPIVVT KSPALRSSGEQSAVSWRPRLDNVEKVVVTDVTTNFLT VTIKESSTDKGFFKDKR

>Hhu\_Cbx8b (ENSHHUG000000050484)  
MELSAVGERVFAAESI IKRRIRRG RMEYLVKWKGS PKFSTWEPEENILDSRLFVAFEERERERELFGPKKRGP K PKT  
FLLKAQAKAKSYEFRSEAVRGIRV TYPTPEPIITPRAREGLRAVVPTIFPPSTVNRGESVRIRPPEPVREHRQPVLQR  
PPGPDGFVIVPKKRGP K PKLRFKDNPFNATSAATEPPKRAEEQATYGPLKLAKLGLSGGEERGSEMRGIKLAHRRQE  
ELGGYPHKQMRPVASGSTQQHYGPDRGLLHSHKIGSDSQACRTKECPSNYLSPPHLKHL SKKNVHQPSEELPQRGKPS  
LIAKIPVSRILGQTDVV TWKPCMNNMEKVLVTDVTTNFLT VTIRESSTDQGFFKDKR

---

**Supplementary File S2. List of the protein sequences encoded by the teleost *Pc* orthologues identified in *this study*.** Sequences of the chromodomain (SM000298) are highlighted in bleu, of the AT hook motif (SM000384) in green and of the Pc box (PF17218) in violet.
