# Supplementary material for: The Polycomb Orthologues in Teleost Fishes and Their Expression in the Zebrafish Model
Source: MDPI journal article supplement (doi:10.3390/genes11040362), 2020-03-27
Supplement: s1 [file s1]

>Dre\_cbx3a

MVNMGKKQAGKSKKEVQEIEEFVVEKVMQDQRVVNGKVEFFLKWKGFSTDADNTWEPEENLDCPELIAAFLESQKGV  
VEKPEAVKRKSSTDEPETEESKAKRKKEMSDKPRGFARNLEPERIIGATDSSGELMFLMKWKDSDEADLVPAREA  
NTRCPQIVIAFYEERLTHWSCPEDQQ

>Dre\_cbx3b

MRKKQNVKNRKAETTVVQEFAVEKIIIRRVNNGKVEYYLKWKGFSTDAENTWEPEDNLDCELIIEEYLRNLTVLG  
QETEQEECQSLDHEVQPKQELTELDADTAHQPPQEELIERTNEEVEEHNAEIPVGQPGHPEPDCIIGCTDQQGEL  
MFLIKWKNTDEVALLAAVEASKRWPQMIVIRFYEDKLTWHGDDEQ

>Cca\_LOC109108755

MRKKQNVKNRKAETTVVQEFVSVEKIIIRRVNDGKVEYYLKWKGFSTDAENTWEPEDNLDCELIIEEFLRNLTVSG  
ETEQEECQSLDHEVQPKQELTELDADTAHQPPQEELIERNEEVNDHNAEIPAGQSSNPEPDCIIGCTDQQGELM  
FLIKWKNTDEVALLSAGETSKRWPEMVIRFYEDKLTWHGEDEQ

>Cca\_LOC109110995

MSVDMGKKQAGKSKKDVQEVEEFVVEKVIDQRLVNGKVEFFLKWKGFSDADNTWEPEENLDCPELISAFLESQKG  
VVEKPEAEKRKSSTDEPETDESKAKRKKEMSDKPRGFARNLEPERIIGATDSSGELMFLMKWKDSDEADLVP  
ANTRCPQIVIAFYEERLTHWSCPEDQQ

>Cca\_LOC109072345

MSVDMGKKQAGKSKKDVQEVEEFVVEKVIDQRLVNGKVEFFLKWKGFSDADNTWEPEENLDCPELISAFLESQKG  
VVEKPEAEKRKSSTDEPETDESKAKRKKEMSDKPRGFARNLEPERIIGATDSSGELMFLMKW

>Cca\_LOC109111778

MGKKQGGKSKKEVQEVEEFVVEKVIDQRVVNGKVEFFLKWKGFSTEADNTWEPEENLDCPELIAAFLESQKGVVEK  
PEAVKRKSSTDEPETDESKAKRKKEMSDKPRGFARNLEPERIIGATDSSGELMFLMKWKDSDEADLVPAREANTR  
CPQIVIAFYEERLTHWSCPEDQQ

>Cca\_LOC109049867

MRKKQNVKNRKAETTVVQEFVSVEKIIIRRVNDGKVEYYLKWKGFSTDAENTWEPEDNLDCELIIEEFLRNLTVSG  
ETEQEGCQSLDLEVQPKQELTELDADMAHQPPQEELIERGNEEVDDHNAEIPAGQSSNPEPDCIIGCTDQQGELM  
FLIKWKNTDDVALLSAGETSKRWPEMVIRFYEDKLTWHGEDEQ

>Cau\_LOC113116259

MRKKQNVKNRKAETTVVQEFVSVEKIIIRRVNDGKVEYYLKWKGFSTDAENTWEPEDNLDCELIIEEFLRNLTVSG  
ETEQEGCQSLDLEVQPKQELTELDADMAHQPPQEELTERGIEEVDDHSAEIPAGQSRNPEPDCIIGCTDQQGELM  
FLVKWKNTDDVALLSAGETSKRWPEMVIRFYEDKLTWHGEDEQ

>Cau\_LOC113060165

MRKKQNVKNRKAETTVVQEFAVEKIIIRRVTTGGKVEYYLKWKGFSTDAENTWEPEDNLDCELIIEEFLRNLTVSG  
ETEQEGCQSLDHEVQPKQELTQLDADMAHQEELIKMGNEEVNDHNAEIPVDQSGNPEPNCCIIGCTDQQGELMFLI  
KWKNTDEVALLSAGETSKRWPEMVIRFYEDKLTWHGEDEQ

>Cau\_LOC113120071

MGKKQGSKSKKDVQEVEEFVVEKVIDQRLVNGKVEFFLKWKGFSTDADNTWEPEENLDCPELISAFLESQKGVVEK  
PEAEKRKSSTDEPETDESKAKRKKEMSDKPRGFARNLEPERIIGATDSSGELMFLMKWKDSDEADLVP  
ANTRCPQIVIAFYEERLTHWSCPEDQQ

>Cau\_LOC113062284

MGKKQGGKSKKEVQEVEEYVVEKVIDQRVVNGKVEFFLKWKGFSTDADNTWEPEENLDCPELIAAFLESQKGVVEK  
PEAVKRKSSTDEPETEESAKRKKEMSDKPRGFARSLEPERIIGATDSSGELMFLMKWKDSDEADLVP  
ANTRCPQIVIAFYEERLTHWSCPEDQQ

>Sgr\_LOC107602402

MGKKQGGKSKKDVQEVEEFVVEKVIDQRVVNGKVEFFLKWKGFSTDADNTWEPEENLDCPELIAAFLESQKGVVEN  
PEAIKRKSSTDEPETDESVAKRKKEMSDKPRGFARNLEPERIIGATDSSGELMFLMKWKDSDEADLVPAREANTR  
CPQIVIAFYEERLTHWSCPEDQQ

>Sgr\_LOC107550827

MRKKQNVKNRKAETTVVQEFAVEKII RRRVNDGKVEYYLKWKGFTDVENTWEPEDNMDCPELIEEFLRNLTVSG  
ETEQEGCRALDHEVQSKQELTEL DADTAHQQPQEELIERGNEEVDDHSAEIPAGQSSNPEPDGIIGCTDQQGELM  
FLIKWKNTDEVALLSAGETSKKWPEMVIRFYEDKLTWHGEDEQ

>Sgr\_LOC107596654

MRKKQNVKNRKAETTVVQEFAVEKII RRRVNDGKVEYYLKWKGFTNAENTWEPEDNLDCPELIEEFLRNLTVSG  
ETEREGCQSLDLEVQPKQELTEL DANMAHQQPQEELMEKGNEEVDDHNAEIPAGQSSNPEPDCIIGCTDQQGELM  
FLIKWKNTDEAALLSAGEASKRWPEMVIRFYEDKLTWHGEDEQ

>Sgr\_LOC107592008

MGKKQGSKTKKDVQEVEEFVVEKVIDQRLVNGKVEFFLKWKGF TDADNTWEPEDNLDCPELISAFLESQKGVVEN  
PEAVKRKSSTDEPETDESKAKRKKEMSDKPRGFARNLEPERIIGATDSSGELMFLMKWKDSDEADLVPKEANTR  
CPQIVIAFYEERLTWHSCPEDEQQ

>Srh\_LOC107744695

MRKKQNVKNRKAETTVVQEFAVEKII RRRVNDGKVEYYLKWKGFTDVENTWEPEDNMDCPELIEEFLRNLTVSG  
ETEQEGCQSLDHEVQSKQELTEL DADMAHQQPQEELIERGNEEVDDHNAEIPAGQSSNPEPDGIIGCTDQQGELM  
FLIKWKNTDEVALLSAGETSKKWPEMVIRFYEDKLTWHGEDEQ

>Srh\_LOC107710359

MGKKQGGKSKKDVQEVEEFVVEKVIDQRVVNGKVEFFLKWKGF TDADNTWEPEENLGCPELIAAFLESQKGVVEN  
PEAVKRKSSTDEPETDESAAKRKKEMSDKPRGFARNLEPERIIGATDSSGELMFLMKWKDSDEADLVPAREANTR  
CPQIVIAFYEERLTWHSCPEDEQQ

>Srh\_LOC107748667

MGKKQGSKTKKDVQEVEEFVVEKVIDQRLVNGKVEFFLKWKGF TDADNTWEPEDNLDCPELISAFLESQKGVVEK  
PEAVKRKSSTDEPETDESKAKRKKEMSDKPRGFARNLEPERIIGATDSSGELMFLMKWKDSDEADLVPKEANTR  
CPQIVIAFYEERLTWHSCPEDEQQ

>Srh\_LOC107743152

MRKKQNVKNRKAETTVVQEFAVEKII RRRVNDGKVEYYLKWKGFTNAENTWEPEDNLDCPELIEEFLRNLTVSG  
EIEQEGCQSLDLEVQPMQELTEL DANMAHQQPQEELIEKGNEEVGDHNAEIPAGQSSNPEPDCIIGCTDQQGELM  
FLIKWKNTDEVALLSAGEASKRWPEMVIRFYEDKLTWHGEDEQ

>San\_LOC107688340

MGKKQGGKSKKDVQEVEEFVVEKVIDQRVVNGKVEFFLKWKGF TDADNTWEPEENLGCPELIAAFLESQKGVVEN  
PEAVKRKSSTDEPETDESAAKRKKEMSDKPRGFARNLEPERIIGATDSSGELMFLMKWKDSDEADLVPAREANTR  
CPQIVIAFYEERLTWHSCPEDEQQ

>San\_LOC107684532

MRKKQNVKNRKAETTVVQEFAVEKII RRRVNDGKVEYYLKWKGFTDVENTWEPEDNMDCPELIEEFLRNLTVSG  
ETEQSLDHEVQSKQELTEL DADTAHQQPQEELIERGNEDVDDHNAEIPAGQSSSPEPDGIIGCTDQQGELMFLIK  
WKNTDEVALLSAGETSKKWPEMVIRFYEDKLTWHGEDEQ

>San\_LOC107685582

MRKKQNVKNRKAETTVVQEFAVEKII RRRVNDGKVEYYLKWKGFTNAENTWEPEDNLDCPELIEEFLRNLTVSG  
ETEQEGCQSLDLEVQPKQELTEL DANMAHQQPQEELIEKGNEEVDDHNAEIPAGQSSNPEPDCIIGCTDQQGELM  
FLIKW

>San\_LOC107656668

MGKKQGSKTKKDVQEVEEFVVEKVIDQRLVNGKVEFFLKWKGF TDADNTWEPEDNLDCPELISAFLESQKGVVEK  
PEAVKRKSSTDEPETDESKAKRKKEMSDKPRGFARNLEPERIIGATDSSGELMFLMKWKDSDEADLVPKEANTR  
CPQIVIAFYEERLTWHSCPEDEQQ

>Cva\_LOC107101725

MRKKQTAKQRKTEETSVVQEFVVEKII RRRVLNGRVEYFLKWKGFTDADNTWEPEDNLDCPGLIQEFRLDADLSK  
EAEQQSEQQVIKEDMAEQETEIQQSNNSVLKPDDEESDAPTDL SNYLEPECIIGSTDRKGELMFLVKWKN SDDV  
ALLSAREASARCPQVVIDFYEQKFTWDCRDEKQ

>Cva\_LOC107084325  
MGKKQNTKPRKENQTQEEPEEFVVEKVIDQRIVNGKVEFYLKWKGFDDADNTWEPEENLDCPELISAFLEAQKNI  
KEKPAAVKRKASTEEPETDSSKKTDAESPRGFARNLDPERIIGATDSSGELMFLMKWKSDEADLVPAREANKRC  
PQVVISFYEERLTHWSCPEDIAQ

>Xma\_LOC106699776  
MRKKQTAKQRKTEETTEVQEFVVEKIIIRRRIFNGRVEYFLKWKGFDDAENTWEPEDNLDPCGLIEEFLLRDAHLR  
EAEQQSEQEFTPKKEEMAKQETESHVTPQEQNSSVLKPDDESDAPTDLSTYLEPECIIGSTDRLKELMFLVKW  
NSDEVALMPAREASARCPQVVIDFYEQKLTWHCGEGEQ

>Xma\_LOC102224488  
MGKKQNTKTKKEAQTEEPPEEFVVEKVMDQRIVNGKVEFYLKWKGFDDADNTWEPEENLDCPELISAFLESQKNI  
KEKPTALKRKASTEEGETDSAKKIEAQPRGFARNLNPEKIIIGATDSSGELMFLMKWKSDEADLVPAREANTRC  
PQVVIAFYEERLTHWSCPEDIAQ

>Pfo\_LOC103145272  
MGKKQNTKTKKEAQTEEPPEEFVVEKVMDQRIVNGKVEFYLKWKGFDDADNTWEPEENLDCPELISAFLESQKNI  
KEKPSAVKRKASTEEGETDSAKKTETEPRGFARNLNPEKIIIGATDSSGELMFLMKWKSDEADLVPAREANTRC  
PQVVIAFYEERLTHWSCPEDIAQ

>Pfo\_LOC103150371  
MRKKQTAKQRKTEETTEVQEFVVEKIIIRRRIFNGRVEYFLKWKGFDDAENTWEPEDNLDPCGLIEEFLLRDAHLR  
EVEEQSEQEFIPKEEMAKQETESHVTPQEQNSVLKPDDESDAPTDLSTYLEPECIIGSTDRLKELMFLVKW  
KNSDEVALMSAREASARCPQVVIDFYEQKLTWHCGEGEQ

>Gaf\_cbx3a (ENSGAFG00000017896)  
MGKKQNTKTKKEAQTEEPPEEFVVEKVMDQRIVNGKVEFYLKWKGFDDADNTWEPEENLDCPELISAFLESQKNI  
KEKPAVAVKRKASTEEGETDSAKKIEAQPRGFARNLNPEKIIIGATDSSGELMFLMKWKSDEADLVPAREANTRC  
PQVVIAFYEERLTHWSCPEDIAQ

>Gaf\_cbx3b (ENSGAFG00000005602)  
MRKKQTAKQRKTEETTEVQEFVVEKIIIRRRIFNGRVEYFLKWKGFDDAENTWEPEDNLDPCGLIEEFLLRDAHLR  
EVEEQSEEEFIPKEEMAKQETESHVTPQEQNSSVLKPDDESDAPTDLSTYLEPECIIGSTDRLKELMFLVKW  
NSDEVALMSAREASARCPQVVIDFYEQKLTWHCGEGEQ

>Pre\_LOC103472202  
MGKKQNTKTKKDAQTEEPPEEFVVEKVMDQRIVNGKVEFFLKWKGFDDADNTWEPEENLDCPELISAFLESQKTI  
KEKPAVAVKRKASTEEGETDSAKKTETEPRGFARNLNPEKIIIGATDSSGELMFLMKWKSDEADLVPAREANTRC  
PQVVIAFYEERLTHWSCPEDIAQ

>Pre\_LOC103478581  
MRKKQTAKQRKTEETTEVQEFVVEKIIIRRRIFNGRVEYFLKWKGFDDAENTWEPEDNLDPCGLIEEFLLRDAHLR  
EVEEQSEQEFIPKEEMAKQETESHVTPQEQNSSVLKPDDESDAPTDLSTYLEPECIIGSTDRLKELMFLVKW  
KNSDEVALMSAREASARCPQVVIDFYEQKLTWHCGEGEQ

>Xco\_LOC114141930  
MRKKQTAKQRKTEETTEVQEFVVEKIIIRRRIFNGRVEYFLKWKGFDDAENTWEPEDNLDPCGLIEEFLLRDAHLR  
EAEQQSEQEFTPKKEEMAKQETESHVTPQEQNSSVLKPDDESDAPTDLSTYLEPECIIGSTDRLKELMFLVKW  
NSDEVALMPAREASARCPQVVIDFYEQKLTWHCGEGEQ

>Xco\_LOC114156510  
MGKKQNTKTKKEAQTEEPPEEFVVEKVMDQRIVNGKVEFYLKWKGFDDADNTWEPEENLDCPELISAFLESQKNI  
KEKPTAVKRKASTEEGETDSAKKIEAQPRGFARNLNPEKIIIGATDSSGELMFLMKWKSDEADLVPAREANTRC  
PQVVIAFYEERLTHWSCPEDIAQ

>Pla\_LOC106945372

MGKKQNTKTKKEAQTQEEPEEFVVEKVMQDRIVNGKVEFYLKWKGFDDADNTWEPEENLDCPELISAFLESQKNI  
KEKPSAVKRKASREEGETDSAKKTETEQPRGFARNLNPEKIIIGATDSSGELMFLMKWKDSDEADLVPAREANTRC  
PQVVIAFYEERLTHWSCPEDIAQ

>Pla\_LOC106950175

MRKKQTAKQRKTEETTEVQEFVVEKIIIRRRIFNGRVEYFLKWKGFDDAENTWEPEDNLDPCGLIEEFLLRDAHLR  
EVEEEQSEQEFIPKEEMAKQETETISHVTPQEQNSGVLPDDEESGAPTDLSTYLEPECIIGSTDRKGELMFLVKW  
KNSDEVALMSAREASARCPQVVIDFYEQKLTWHCGEGEQ

>Pme\_LOC106923566

MGKKQNTKTKKEAQTQEEPEEFVVEKVMQDRIVNGKVEFYLKWKGFDDADNTWEPEENLDCPELISAFLESQKNI  
KEKPSAVKRKASTEGETDSAKKTETEQPRGFARNLNPEKIIIGATDSSGELMFLMKWKDSDEADLVPAREANTRC  
PQVVIAFYEERLTHWSCPEDIAQ

>Pme\_LOC106928233

MRKKQTAKQRKTEETTEVQEFVVEKIIIRRRIFNGRVEYFLKWKGFDDAENTWEPEDNLDPCGLIEEFLLRDAHLR  
EVEEEQSEQEFIPKEEMAKQETETISHVTPQEQNSGVLPDDEESDAPTDLSTYLEPECIIGSTDRKGELMFLVKW  
KNSDEVALMSAREASARCPQVVIDFYEQKLTWHCGEGEQ

>Nfu\_cbx3 (Gene ID: 107383357)

MGKKQNTKPKKETETQEEPEEFVVEKVLQDRIVNGKVEFYLKWKGFTEADNTWEPEDNLDCELIQAFLDSQKNI  
KEKPAAVKRKASTDDAEEEPKKKDVPDKPRGFARNLEPERIIGATDSSGELMFLMKWKESDEADLVPAREANTRC  
PQVVISFYEERLTHWSCPEDIAQ

>Nfu\_LOC107395330

MRKKQTAKQRKTEEPAEVQEFVVDRIIRRRVFDGRVEYFLKWKGFDDAENTWEPEDNLDCELIIEEFLLRSAPPT  
DEQSEQQFRPKTEEMTEQDVELSSEQSNCSNGVPKQDDEQSDAPINLSTYLEPECIIGSTDRKGELMFLVKWNSD  
DVALLPAREASLRCPQVVIDFYEQKLTWHCGDEEP

>Fhe\_LOC105926367

MRKKQTAKQRKTEETAEVQEFVVEKIIIRRRICNGRVEYFLKWKGFDDADNTWEPEDNLDPCGLIEEFLLRDADLSG  
ETEEERSEQQFIPREEMAEQETETISCVRSQQQSNNSVLKPDDEASDAPTNLSTYLEPECIIGSTDRQGELMFLVK  
WKNSEFALLSAREASARCPQVVIDFYEQKLTWHSDNKGQ

>Fhe\_LOC105934310

MGKKQHTRPKKEAQAQEEPEEFVVEKVIDQDRIVNGKVEFYLKWKGFTEADNTWEPEENLDCPELISAFLEAQKNI  
KEKPAAVKRKASTEVEADPAKKTEAEKPRGFARNLDPERIIGATDSSGELMFLMKWKESDEADLVPAREANTRC  
PQVVISFYEERLTHWSCPEDIAQ

>Kma\_cbx3 (Gene ID: 108238543)

MGKKQNTKSKKDDQTQEEPEEFVVEKVLQDRLVNGKVEFFLKWKGFDDADNTWEPEENLDCPELIQAFLDSQKNV  
KEKPAPVKKASTDEPESESKKKDVEEKPRGFARNLEPERIIGATDSSGELMFLMKWKDSDEADLVPAREANTRC  
PQVVISFYEERLTHWSCPEDIAQ

>Kma\_LOC108241914

MRKKQTAKPRKAEETAEVQEFVVEKIIIRRRVSNRVEYFLKWKGFDDAENTWEPEDNLDCELIIEEFLLRDAPLQE  
ENEEEPNEPCFVPKEEMTEQETETISSVQSGGGGGGDDGGVQLQADDDQPDGPVNLSTYLEPECIIGSTDRKGELMF  
LVKWKNSDDVALLPAREASARCPQVVIDFYEQKLSWNVGDEEQ

>Mze\_cbx3 (Gene ID: 101470889)

MGKKQNTKSKKDAQDTQEEPEEFVVEKVLQDRVVNGKVEFYLKWKGFDDADNTWEPEENLDCPELISAFLEAQKN  
VKEKPAPVKKASTEETPETEPKKKDVAEKPRGFARNLEPERIIGATDSSGELMFLMKWKDSDEADLVPAREANTR  
CPQVVISFYEERLTHWSCPEDIAQ

>Mze\_LOC101483327

MRKKQTAKQRKTEETTQVQEFVVEKIIIRRRISNGRVEYFLKWKGFDDAENTWEPEDNLDCELIIEEFLLRNAHFTE  
ENEEEPQEQGFVPKEEMAEETEETISCVQEAQAVKTDNSVLQPDDEQKNSPDLSTYLEPECIIGSTDRKGELMFL  
VKWKNSDDVALLPAREASARCPQVVIDFYEQKLTWHCGDDEQ

>Oni\_LOC100694541

MRKKQTAKQRKTEETTUVQEFVVEKIIIRRRISNGRVEYFLKWKGFTDAENTWEPEDNLDCEPILIEEFLRNAHFSE  
ENEEEQTEQGFPKEEMAEETEISCVQEAQAVKTDNSVLQPDDEQTDSPSDLSTYLEPECIIGSTDRKGELMFL  
VKWKNSDDVALLPAREASARCPQVVIDFYEQKLTWHCGDDEQ

>Oni\_LOC100694248

MGKKQNTKSKKDTQETQEEPEEFVVEKVLDQRVVNGKVEFYFLKWKGFTDADNTWEPEENLDCPELISAFLEAQKN  
VKEKPAPVKRKASTEETEPETEPKKKDVAEKPRGFARNLEPERIIGATDSSGELMFLMKWKDSDEADLVPAREANTR  
CPQVVISFYEERLTHWSCPDEAQ

>Hbu\_cbx3 (Gene ID: 102307347)

MRKKQTAKQRKTEETTUVQEFVVEKIIIRRRISNGRVEYFLKWKGFTDAENTWEPEDNLDCEPILIEEFLRNAHFTE  
ENEEEPPEQGFPKEEMAEETEISCVQEAQAVKTDNSVLQPDDEQTNPSDDLSTYLEPECIIGSTDRKGELMFL  
VKWKNSDDVALLPAREASARCPQVVIDFYEQKLTWHCGDDEQ

>Hbu\_LOC102308912

MGKKQNTKSKKDAQDTQEEPEEFVVEKVLDQRVVNGKVEFYFLKWKGFTDADNTWEPEENLDCPELISAFLEAQKN  
VKEKPAPVKRKASTEETEPETEPKKKDVAEKPRGFARNLEPERIIGATDSSGELMFLMKWKDSDEADLVPAREANTR  
CPQVVISFYEERLTHWSCPDEAQ

>Nbi\_LOC102791258

MRKKQTAKQRKTEETTUVQEFVVEKIIIRRRISNGRVEYFLKWKGFTDAENTWEPEDNLDCEPILIEEFLRNAHFTE  
ENEEEQPEQGFPKEEMAEETEISCVQEAQAVKTDNSVLQPDDEQTNPSDDLSTYLEPECIIGSTDRKGELMFL  
VKWKNSDDVALLPAREASARCPQVVIDFYEQKLTWHCGDDEQ

>Nbi\_LOC102789869

MGKKQNTKSKKDAQDTQEEPEEFVVEKVLDQRVVNGKVEFYFLKWKGFTDADNTWEPEENLDCPELISAFLEAQKN  
VKEKPAPVKRKASTEETEPETEPKKKDVAEKPRGFARNLEPERIIGATDSSGELMFLMKWKDSDEADLVPAREANTR  
CPQVVISFYEERLTHWSCPDEAQ

>Pny\_cbx 3 (Gene ID: 102213635)

MGKKQNTKSKKDAQDTQEEPEEFVVEKVLDQRVVNGKVEFYFLKWKGFTDADNTWEPEENLDCPELISAFLEAQKN  
VKEKPAPVKRKASTEETEPETEPKKKDVAEKPRGFARNLEPERIIGATDSSGELMFLMKWKDSDEADLVPAREANTR  
CPQVVISFYEERLTHWSCPDEAQ

>Pny\_LOC102197024

MRKKQTAKQRKTEETTUVQEFVVEKIIIRRRISNGRVEYFLKWKGFTDAENTWEPEDNLDCEPILIEEFLRNAHFTE  
ENEEEQPEQGFPKEEMAEETEISCVQEAQAVKTDNSVLQPDDEQTNPSDDLSTYLEPECIIGSTDRKGELMFL  
VKWKNSDDVALLPAREASARCPQVVIDFYEQKLTWHCGDDEQ

>Aca\_LOC113032446

MRKKQTAKQRKTEETTUVQEFVVEKIIIRRRISNGRVEYFLKWKGFTDAENTWEPEDNLDCEPILIEEFLRNAHFTE  
ENEEEQPEQGFPKEEMAEETEISCVQEAQAVKTDNSVLQPDDEQKNPSDDLSTYLEPECIIGSTDRKGELMFL  
VKWKNSDDVALLPAREASARCPQVVIDFYEQKLTWHCGDDEQ

>Aca\_LOC113014873

MGKKQNTKSKKDAQDTQEEPEEFVVEKVLDQRVVNGKVEFYFLKWKGFTDADNTWEPEENLDCPELISAFLEAQKN  
VKEKPAPVKRKASTEETEPETEPKKKDVAEKPRGFARNLEPERIIGATDSSGELMFLMKWKDSDEADLVPAREANTR  
CPQVVISFYEERLTHWSCPDEAQ

>Aci\_cbx3a (ENSACIG00000002111)

MGKKQNTKSRKDTQETQEEPEEFVVEKVLDQRVVNGKVEFYFLKWKGFTDADNTWEPEENLDCPELISAFLESQKN  
VKEKPAPVKRKASTEETEPETESKKKDVKPRGFARNLEPERIIGATDSSGELMFLMKWKDSDEADLVPAREANTRCP  
QVVISFYEERLTHWSCPDEAQ

>Aci\_cbx3b (ENSACIG00000016058)

MRKKQTAKQRKTEETTUVQEFVVEKIIIRRRILNGRVEYFLKWKGFTAENTWEPEDNLDCEPILIEEFLRNAHFSEE  
NEDEQTEQESQQQAQAVKTDNSVLQPDDEQSHSPTDLSTYLEPECIIGSTDRKGELMFLVKRKNSDDVALLPARE  
ASARCPQVVIDFYEQKLTWHCGDDEQ

>Tru\_LOC101067559

MGKKQKTKRDSMETTEQPEEFVVEKILDQRLVNGKVEFYFLKWKGFTDADNTWEPEENLDCPDLISAFLEAQKNIK  
EKTAPKRKSTDEPETEAKKKDAEKPRGFARNLEPERIIGATDSSGELMFLMKWKGSDADLVPAREANVRCPQIV  
ISFYERLTHWSCPDEAQ

>Tru\_LOC101061787

MRKKQTAKQRKTEETAVVQEFQFAVDKIIIRRVNLNGRVEYFLKWKGFTDAENTWEPEDNLDCELIIEEFLRNTFPFD  
GIEEGQEFVPKEEMTEQETEIIPRPPSDGVVPEPDEERSDTHSDRSSYPEPECIIGSTDRQGELVFLIKWKNSEDV  
ALLPAREASARYPQMVIDFYERKLTWHCGDEEQ

>Tni\_ENSTNIG00000001200

MGKKQKTKKDSMETTTTEQPEEFVVEKILDQRLVNGKVEFYFLKWKGFTDADNTWEPEENLYCPDLISAFLEAQKNI  
KEKSAPKRKLTDEPETEAKKKDAEKPRGFARNLDPERIIGATDSSGELMFLMKW

>Tni\_ENSTNIG000000018425

MRKKQTAKQRKTEETAVVQEFQFAVDKIIIRRVVDGRVEYFLKWKGFTDAENTWEPEDNLDCELIIEEFLRNTFRPQ  
EEGLELVPKEEMTEQEAEMVSVRTNAKVEELSFALEPDEEQTDPRDDPGASPEPECIIGSTDRQGELVFLVKWK  
NSEDVGLLPAREASVRYPQMVIQFYERKLAWHCGDDEQ

>Mmo\_cbx3a (ENSMMOG00000000435)

MGKKQKTKRDSQGNQEEPEEFVVEKVLDQRLVNGKVEFYFLKWKGFTDASLVWGCPEENLDCPELISAFLEAQKNI  
TEKPAAVKRKASTDEPETEAKKKDVAEKPRGFARNLEPERIIGATDSSGELMFLMKWKSDADLVPAREANTRC  
PQVVISFYERLTHWSCPDEVQ

>Mmo\_cbx3b (ENSMMOG00000001662)

MRKKQTAKQRKTEETAVVQEFVVEKIIIRRIIFNGRVEYFLKWKGFTDAENTWEPEDNLDCELIIEEFLRNAIYVH  
LEKPSLNRGGGLRHHLNLEPNDDHSDAPANLSTYLEPECIIGSTDRQGELMFLIKWKNSDDVALLPAREASARC  
PQMVIDFYEQKLTWHCGDEEQ

>Lcr\_LOC104940580

MGKKQNTKGKKDSQESQEEPEEFVVEKVLDQRLVNGKVEFFLKWKGFTDADNTWEPEENLDCPELISGFLEAQKN  
VKEKPAPVKRKASTDEPETEAKKKDTEKPRGFARNLDPERIIGATDSSGELMFLMKWKSDADLVPAREANTRC  
PQVVISFYERLTHWSCPDEAQ

>Lcr\_LOC104927770

MRKKQTAKQRKTEETTIVVQEFVVEKIIIRRVFNNGRVEYFLKWKGFTDAENTWEPEDNLDCELIIEEFLRNAHFSE  
EIEEEQSEQELIPKEEMTEQETEISCMQSQQAHTVQNSDVLEPNDEQSDTPTNLTTYPEPECIIGSTDRQGELM  
FLVKWKNSDDVALLPAREASARCPQVVIDFYEQKLTWHCGDEEQ

>Pfl\_cbx3 (Gene ID: 114567991)

MHNMGKKQNTKGNVKKDAQDTQEEPEEFVVEKVLDQRLVNGKVEFFLKWKGFTDADNTWEPEENLDCPELISAFLE  
AQKNVKEKPAPVKRKASTDEPETEAKKKDAEKPRGFARNLDPERIIGATDSSGELMFLMKWKSDADLVPARE  
ANTRCPQVVISFYERLTHWSCPDEAQ

>Pfl\_LOC114557836

MRKKQTAKQRKTEETPTVVQEFVVEKIIILRRIFNGRVEYFLKWKGFTDAENTWEPEDNLDCELIIEEFLRNTHFS  
EVNEEERSEQEFIPKEEMTEQETEISFMQSQQSNSEPNQKQSDPTNLNTYLEPECIIGSTDRQGELMFLVKWK  
NSDDVALLPAREASVRCPQVVIDFYEQKLTWHCGDEEQ

>Sdu\_LOC111223223

MGKKQNTKGKKDAQETQEEPEEFVVEKVLDQRLVNGKVEFYFLKWKGFTDADNTWEPEENLDCPELISAFLEAQKN  
ITEKPAPVKRKASTEETPETEAKKKDVAEKPRGFARNLEPERIIGATDSSGELMFLMKWKSDADLVPAREANTR  
CPQVVISFYERLTHWSCPDEAQ

>Sdu\_LOC111238784

MRKKQTAKQRKTEETTIVVQEFVVEKIIIRRIISNGRVEYFLKWKGFTDAENTWEPEDNLDCELIIEEFLRNTHLSE  
ENEEEQTEQEFVPKEEMTEQETEISQRQTHTLQSDSNVLEPNQKQSDAPTNLSTYLEPECIIGSTDRQGELMFLV  
KWKNSDDVALLPAREASARCPQVVIDFYEQKLTWHCGDEEQ

>Sla\_LOC111673325

MGHAGSRRRRHDYSLWRPSCRAADEIKKWPREHNMGKKQNTKGKKDAQETQEEPEEFVVEKVLDQIRIVNGKVEFYL  
KWKGFDTADNTWEPEENLDCPELISAFLEAQKNITEKPAPVKRKASTEEPETEAKKKDVQPEKPRGFARNLEPER  
IIGATDSSGELMFLMKWKDSDEADLVPAREANTRCPQVVISFYEERLTHWSCPDEAQ

>Sla\_LOC111652798

MRKKQTAKQRKTEETTUVQEFVVEKIIIRRRISNGRVEYFLKWKGFDTAENTWEPEDNLDCELIIEEFLRNTHLLS  
EENEEQTEQEFVPKEEMTEQETEISQRQTHTLQSDSNVLEPNDKQSDAPTNLSTYLEPECIIGSTDRQGELMFL  
VKWKNSDDVALLPAREASARCPQVVIDFYEQKLTWHCGDEEQ

>Lbe\_cbx3 (Gene ID: 109994620)

MGKKQNTKGKKDAQETQEEPEEFVVEKVLDQIRIVNGKVEFFLKWKGFTDADNTWEPEENLDCPELISGFLEAQKN  
VKEKPAPVKRKASTDEPETEAKKKDVPEKPRGFARNLEPERIIGATDSSGELMFLMKWKDSDEADLVPAREANTR  
CPQVVISFYEERLTHWACPDEAQ

>Lbe\_LOC109986704

MRKKQTAKQRKTEVTTVVQEFVVEKIIIRRRIFNGRVEYFLKWKGFDTAENTWEPEDNLDCELIEHFLNTHFSEE  
NEEEQTEVGFIKKEEMTEQETEISCLSQQRTPIMQTNSDVLEQNDEQSDTPTNLSTYLEPECIIGSTDRQGELM  
FLVKWKNCDEVALLPAREASARCPQVVIDFYERKLTWHCGEEEL

>Cgo\_LOC115021151

MGGRAVPDHWTRNGLLSDSAVRSSPSSPPGPGMTFSLGNHFLRASTAI FNLKMRKKQTAKQRKTEETPVVQEF  
VVEKII LRRI FNGRVEYFLKWKGFDTAENTWEPEDNLDCELIIEEFLRNTHYLN EEEQNVQELIPKEEMTEQETE  
ISYMQSQQAHTEQSNSEPNDEQSETPTNLSTYLEPECIIGSTDKQGELMFLVKWKNSDDVALLPAREASARCPQ  
VVIDFYEQKLTWHCGDEEQ

>Cgo\_LOC115016275

MGKKQNTKGKKDAQDTQEEPEEFVVEKVLDQRLVNGKVEFFLKWKGFTADNTWEPEENLDCPELISAFLEAQKN  
VKEKPAPVKRKASTDEPETEAKKKDVAEKPRGFARNLDPERIIGATDSSGELMFLMKWKDSDEADLVPAREANTR  
CPQVVISFYEERLTHWSCPDEAQ

>Ena\_LOC115051003

MGKKQNTKGKKDAQETQEEPEEFVVEKVLDQIRIVNGKVEFFLKWKGFTDADNTWEPEENLDCPELISAFLESQKN  
ITEKPAPVKRKASTDEPETEAKKKDVAEKPRGFARNLEPERIIGATDSSGELMFLMKWKDSDEADLVPAREANTR  
CPQVVISFYEERLTHWSCPDEVQ

>Ena\_LOC115045440

MRKKQTAKQRKTEETTUVQEFVVEKIIHRRISNGRVEYFLKWKGFDTAENTWEPEDNLDCELIIEEFLRNTHLS  
ENEEQTEQDFVPKEEMTEQETEISQQQAHTLQSDGDVLEPNDEQSDAPTNLSTYLEPECIIGSTDRQGELMFLV  
KWKNSDDVALLPAREASARCPQVVINFYEQKLTWHCGDEDQ

>Pra\_cbx3 (Gene ID: 114450982)

MGKKQNTKTKKDSSEAQEEPEEFVVEKVLDQRLVNGKVEFFLKWKGFTDADNTWEPEENLDCPELISAFLESQKN  
IKEKPAPIKRKASTDEAETDAKKKDVEKPRGFARNLEPERIIGATDSSGELMFLMKWKDSDEADLVPAREANTRC  
PQVVISFYEERLTHWSCPDEAQ

>Pra\_LOC114448349

MRKKQTAKQRKTEETTUVQEFVVEKIIIRRRIFNGRVEYFLKWKGFDTAENTWEPEDNLDCELIIEEFLRNTQISE  
ENEEQTEFVPKEEMTEQETEISCVQQTCAVQSDGSVLQPDQPSDPTNLSTYLEPECIIGSTDRKGELMFLVK  
WKNSDDVALLPAREASARCPQVVIDFYEQKLTWHCGDEEQ

>Lcr\_LOC108891497

MRKKQTAKQRKTEETTUVQEFVVEKIIIRRRVSNRVEYFLKWKGFDTAENTWEPEDNLDCELIIEEFLRNTNLSE  
ENEEERTDQEFIPKEEMTEQETEISCMQSQRQAHAVQSDSDVLEPNDEQSDAPPNLSTYLEPECIIGSTDRQGEL  
MFLVKWKNSDDVALLPAREVSARCPQVVIDFYEQKLTWHCGDEEQ

>Lcr\_LOC108877463

MGKKQNTKGKRDSQESQEEPEEFVVEKVLDQIRIVNGKVEFFLKWKGFTDADNTWEPEENLDCPELISAFLESQKN  
IKEKPAPVKRKASTDEPETEA KRKDVAEKPRGFARNLDPERIIGATDSSGELMFLMKWKDSDEADLVPAREANTR  
CPQVVISFYEERLTHWSCPDEAQ

>Spa\_cbx3 (Gene ID: 103364037)

MRKKQTAKQRKTEETTUVQEFVVEKII RRRISNGRVEYYLKWKGFTDAENTWEPEDNLDCPELIEEFLRNAHLSDEEEEFIPKEEMTEQETEI SCVQQAHAVHSNEDIVLQPDDEQSDAPANLSTYLEPECIIGSTDRKGELMFLVKWKN SDDVALLPAREASARCPQVVIDFYEQKLTWHCGDEEQ

>Spa\_LOC103364624

MGKKQNTKTKKDAQETQEEPEEFVVEKVLDQRLVNGKVEFFLKWKGFTDADNTWEPEENLDCPELISAFLEAQKN VKEKPAPVKRKASTDEPETESKKKDVAEKPRGFARNLEPERIIGATDSSGELMFLMKWKDSDEADLVPAREANTR CPQVVISFYEERLTHWSCPDEAQ

>Apo\_LOC110955790

MGKKQNTKTKKDAQETQEEPEEFVVEKVLDQRLVNGKVEFFLKWKGFTDADNTWEPEENLDCPELISAFLEAQKN VKEKPAPVKRKASTDEPETESKKKEVAEKPRGFARNLEPERIIGATDSSGELMFLMKWKDSDEADLVPAREANTR CPQVVISFYEERLTHWSCPDEAQ

>Apo\_LOC110951430

MRKKQTAKQRKTEETTUVQEFVVETIIRRRVFNGRVEYYLKWKGFTDAENTWEPEDNLDCPELIEEFLRTYNPED DEVFIPKEEMSEQETEI SCVQEAHAVQSNSSLVLQPDDEQSDAPANLSTYLEPECIIGSTDRKGELMFLVKWKN SDDVALLPAREASARCPQVVIDFYEQKLTWHSGDEEQ

>Aoc\_LOC111579711

MGKKQNTKTKKDAQDTQDEPEEFVVEKVLDQRLVNGKVEFFLKWKGFTDADNTWEPEENLDCPELISAFLEAQKN VKEKPAPVKRKASTDEPETESKKKDVAEKPRGFARNLEPERIIGATDSSGELMFLMKWKDSDEADLVPAREANTR CPQVVISFYEERLTHWSCPDEAQ

>Aoc\_LOC111588833

MRKKQTAKQRKTEETTUVQEFVVETIIRRRVFNGRVEYYLKWKGFTDAENTWEPEDNLDCPELIEEFLRTYNPED DEVFIPKEEMTEQETEI SCVQEPHAVQSNSSLVLQPDDEQSDAHTNLSTYLEPECIIGSTDRKGELMFLVKWKN SDDVALLPAREASARCPQVVIDFYEQKLTWHSGDDEEQ

>Ape\_cbx3a (ENSAPEG00000019335)

MGKKQNTKTKKDAQDTQEEPEEFVVEKVLDQRLVNGKVEFFLKWKGFTDADNTWEPEENLDCPELISAFLEAQKN VKEKPAPVKRKASTDEPETESKKKDVAEKPRGFARNLEPERIIGATDSSGELMFLMKWKDSDEADLVPAREANTR CPQVVISFYEERLTHWSCPDEAQ

>Ape\_cbx3b (ENSAPEG00000010544)

MRKKQTAKQRKTEETTUVQEFVVETIIRRRVFNGRVEYYLKWKGFTDAENTWEPEDNLDCPELIEEFLRTYNPED DEVFIPKEEMTEQETEI SCVQEPHAVQSNSSLVLQPDDEQSDAPTNLSTYLEPECIIGSTDRKGELMFLVKWKN SDDVALLPAREASARCPQVVIDFYEQKLTWHSGDDEEQ

>Nco\_cbx3 (Gene ID: 104949902)

MRKKQTAKQRKTEETPVVQEFVVEQIILRRIYNGRVEYFLKWKGFTDADNTWEPEDNLDCPELIQEFRLNTHFFN EEEQNEQEFIPKEEMTEQETEI SCMQSLQQTHTVQSNSEPNDEQSDTPTNLSTHLEPECIIGATDRKGELMFLVK WKN SDDVALLPAREASARCPQVVIDFYEQKLTWHCGDEEQ

>Nco\_LOC104966666

MAKKQNTKTKKDAQDPQEEPEEFVVEKVLDQRLVNGKVEFFLKWKGFTDADNTWEPEENLDCPELISAFLEAQKN VKEKPAPVKRKLSTEEPESEAKKDVPEKPRGFARNLDPERIIGATDSSGELMFLMKWKDSDEADLVPAREANTR CPQVVISFYEERLTHWSCPDEAQ

>Cse\_LOC103394257

MGKKQNKKGQDTQEEPEEFVVEKVLDQRIFNGKVEFFLKWKGFTDADNTWEPEENLDCPELISAFLEAQKNIKE KPATVKKRLSADEPESEAKKKEAEKPRGFARNLDPERIIGATDSSGELMFLMKWKN SDEADLVPSREANVRCPQV VISFYEERLTHWRR

>Cse\_LOC103388431

MRKKQTAKQRKTEETAUVQEFAVEKII RRRIFNGRVEYFLKWKGFTDADNTWEPEDNLDCPELIEEFLRNHLSQ QNEEEDTEFIPKEEMTEQETGIQRDHTLPTDSGVLEPDEEPSDLAHLVPECIIGSTDRQGELMFLVKWKN SDDV ALLPAREVSARS PQVVIDFYEQKLTWHCGEEEQ

>Sma\_cbx3a (ENSSMAG00000014860)



MGKKQTIKGKKDSQETQEEPEEFVVEKVLDQRLVNGKVEFFLKWKGFDTADNTWEPEENLDCPELISAFLEAQKT  
ITEKPAPMKRKASTDEPETEAKKKDVAEKPRGFARNLDPERIIGATDSSGELMFLMKW

>Sma\_cbx3b (ENSSMAG00000020282)

MRKKQTAKQRKTEETTVVQEFVVEKIIRRRVFNGRVEYFLKWKGFDTAENTWEPEDNLDCELIIEEFLRNTHCLE  
ENEEPTQFIPKEEMTEQETEISCLQSQQQVCALQSDGGVLLPENGDEQSDAPANLSNYLEPECIIGSTDRQGEL  
MFLVKWKNSSDDVALLPAREASARCPQVVIDFYEQKLTWNCGDEEQ

>Ame\_LOC103046426

MGKKQLTKSKKEVEEPEEFVVEKVIDQRVVNGKVEFFLKWKGFDPDTNTWEPEENLDCPELISAFLLTSQKGVVEN  
PDSNKRKSSSTDEPETDENSAKRKKELSEKPRGFARNLEPERIIGATDSSGELMFLMKWKDSDEADLVPAREANTR  
CPQVVIAFYEERLTHWSCPDEQQ

>Pna\_LOC108425284

MGKKQVNSKKEVEEPEEFVVEKVLDQRVVNGKVEFFLKWKGFDPDTNTWEPEENLDCPELISAFLLTSQKGVVEK  
PDSNKRKSSSTDEPETEENSAKRKKEMSEKPRGFARNLEPERIIGATDSSGELMFLMKWKDSDEADLVPAREANTR  
CPQVVIAFYEERLTHWSCPDEQQ

>Pna\_LOC108441518

MRKKQNVKNRKAETTVVQEFAVEKIIRRRVNDGKVEYYLKWKGFDTAENTWEPEDNLDCELIIEEFLRNMAVSG  
EREDSNSLEPVIQPKELTELADTVHQQCQSKQTESKTGPQGDHDTATADNRSTSPEPERIIGSTDRHGELMF  
LIKWKDTHDVALLSAREASARWPQMVIQFYEDKLTWHGEEEP

>Mar\_LOC113122625

MRKKQTAKQRKTEETTDVQEFVVEKIIRRRISDGRVEYFLKWKGFDTAENTWEPEDNLDCELIIEEFLRNSQLSG  
ENEEQPELIPKEELTEQETEISCVRPQLQPRTVQSGGDVLEPNSEPSGVHANLSTYLEPECIIGSTDRQGELMF  
LVKWKNSSDDVALLSAREASARCPQVVIDFYEQKLTWHCGDEEQ

>Mar\_LOC113125891

MGKKQNTKTKKDTQEEPEEFVVEKVLDQRVVNGKVEFFLKWKGFDTADNTWEPEENLDCPELISAFLESQKNIK  
EKPAVPKRKASTDEPEPEAKKKDAEKPRGFARNLEPERIIGATDSSGELMFLMKWKDSDEADLVPAREANVRCPQ  
VVISFYEERLTHWSCPDEAQ

>Mal\_LOC109968149

MGKKQNTKGKKDAQEEPEEFVVEKVLDQRIVNGKVEFYFLKWKGFDTADNTWEPEENLDCPELISAFLEAQKSIKE  
KPAPVKRKASTDEPEAQAKKKDMAEKPRGFARNLEPERIIGATDSSGELMFLMKWKDSDEADLVPAREANTRCPQ  
VVISFYEERLTHWS

>Mal\_LOC109967352

MRKKQTAKQRKTEETTLVQEFVVEKIIRRRVSNRVEYFLKWKGFDTAENTWEPEDNLDCELIGEFLLRNHVS  
ENDEEQTEQEFIPKEEPTQETEISCMRPQQQAHTVSNDSVLEPNSEPSDATNLSSYLEPECIIGSTDRQGEL  
MFLVKWKNSSDDVALLPAREASARCPQVVIDFYEQKLTWHCGDEEQ

>Ate\_LOC113170961

MRKKQTAKQRKTEETTVVQEFVVEKIIRRRVFNGRVEYFLKWKGFDTAENTWEPEDNLDCELIIEEFLRNSRLSEG  
NEETDQELIPKEEMTEQETEISCMRPQQQIHTVPSDRGVLEPNDEHSDTPTNLSTYLEPECIIGSTDRQGELMF  
VKWKDSDDVALLPAREASARCPQVVIDFYEQKLTWHCGDEEQ

>Ate\_LOC113153869

MGKKQNTKSKKDAQETQDEPEEFVVEKVLDQRVVNGKVEFFLKWKGFDTADNTWEPEENLDCPELISAFLESQKN  
IKEKPAPVKRKASTDEPETDAKKKDVTEKPRGFARNLEPERIIGATDSSGELMFLMKWKDSDEADLVPAREANTR  
CPQVVISFYEERLTHWSCPDEAQ

>Bsp\_LOC114865848

MGKKQNTKGKKDAQETQDEPEEFVVEKVLDQRVVNGKVEFFLKWKGFDTADNTWEPEENLDCPELISAFLESQKN  
VKEKPAPVKRKASTDEPETDAGDAKKKEVTEKPRGFARNLDPERIIGATDSSGELMFLMKWKDSDEADLVPAREA  
NTRCPQVVISFYEERLTHWSCPDEAQ

>Bsp\_LOC114843466

MRKKQTAKQRKTEETVVQEFVVEKIIIRRRVFNGRVEYFLKWKGFDTAENTWEPEDNLDCEPILIDEFLRNAHLSDE  
NEETEQLIPKEEMTEQETEIISCMRPQSDGGGGGGALEPHDEPPDAPYLEPECIIGSTDRQGELMFLVKWKDSDD  
VALLPAREASARCPQVVIAFYEQKLSWHCGDDEP

>Gwi\_LOC114472522

MGKKQNSKSKDATGVQAEPEEFVVEKVIDQRLVNGKVEFFLKWKGFTEADNTWEPEENLDCPELISAFLEAQKNI  
KEKPGGVKRKASTEEDTDGKKKESEKPRGFARNLDPERIIGATDSSGELMFLMKWKDSDEADLVPAREANTRCP  
QVVISFYERLTHWSCPEDIAQ

>Gwi\_LOC114478298

MRKKQTAKQRKTEDTAVVQEFAVEKIMRRRVYNGRVEYFLKWKGFDTSAENTWEPEDNLDCEPILIEDYLKNGHNL  
ENEDDQCNEFTPKKEEISMQETETIAHSQDVKSDSVALQPLNDPTDLSTYLEPECIIGSTDRKGELMFLVKWKNSDD  
VALLSAREASTRCPQVVIDFYEQKLSWHCGDQEP

>Pma\_cbx3a (ENSPMGG00000006267)

MGKKQNTKSKKDSSTSEEPPEEFVVEKILDQRLVNGKVEFYFLKWKGFTEADNTWEPEENLDXXXXQKNIKEKPAAV  
KRKASTEEAEPEPKKTNEKPRGFARNLEPERIIGATDSSGELMFLMKWKDSDEADLVPKEANKRCPQVVISFYE  
ERLTHWSCPEDIAQ

>Pma\_cbx3b (ENSPMGG00000011799)

MRKKQTAKQRKTEDSSVVQEFVVEKIIIRRRVSNGRVEYFLKWKGFDTADNTWEPEDNLDCEPILIEAFLVKNHNL  
ENSEEDQGEIIPKEEMTEQETEIIVSTSNAELSDSKSHLSRQPEPECIIGSTDRRGELMFLVKWKNSDVALPAR  
EVSARCPQVVINFYEQKLTWHCSEDEQ

>Sfa\_LOC115396622

MRKKQTAKQRKTEETTAVVQEFQAVDQIIIRRRVFNGRVEYFLKWKGFDTAENTWEPEDNLDCEPILIEEFNRNSHFSE  
QNEEQAEFIPKEEMTERETETISCLQSQHQATMQSDSRILQPDDEHSDGPTDLSSYLEPECIIGSTDRKGELMF  
LVKWKNSDDVALLPAHEASARCPQVVIDFYERKLTWHCREEEEEAAAAEEEEEQ

>Sfa\_LOC115381000

MGKKQNTKGKRDSETQEEPEEFVVEKVLDQRLVNGKVEFFLKWKGFDTADNTWEPEENLDCPELISAFLEAQKN  
IKEKPATVKRKASTEPEMDSKKKEVAEKPRGFARNLEPERIIGATDSSGELMFLMKWKDSDEADLVPSREANTR  
CPQVVISFYERLTHWSCPEDIAQ

>Ola\_LOC101159942

MRKKQTAKQRKTEETTAVVQEFVVEKIIIRRRVFNGRVEYFLKWKGFDTAENTWEPEDNLDCEPILIEEFNRNAPAF  
PEENEEQSEQTLVPKEEMTEQETEIFSELASASHGDGYVLQSDDEQSDAPTDLSNYLEPECIIGSTDRKGELMF  
LVKWKNSDVALPAREASTRCPQVVIDFYEQKLTWHCGDEEQ

>Ola\_LOC100049459

MGKKQNTKSKKDSQDTQEEPEEFVVEKVLDQRLVNGKVEFYFLKWKGFDTADNTWEPEENLDCPELISAFLESQKN  
IKEKPAAVKRKASTDEPETEPKKKDMAEKPRGFARNLEPERIIGATDSSGELMFLMKWKDSDEADLVPAREANTR  
CPQVVISFYERLTHWSCPEDIAQ

>Gac\_cbx3a (ENSGACG00000007069)

FAPDKFLVHNMGKKPNTKGKKDAHDTPEEPEEFVVEKVLDQRIVNGKVEFFLKWKGFTEADNTWEPEDNLDCEPIL  
ISAFLEAQKNVKEKPAPVKRKASTDEPETEAKKKDVAEKPRGFARNLDPERIIGATDSSGELMFLMKWKDSDEAD  
LVPAREANTRCPQVVISFYERLTHWSCPEDIAQ

>Gac\_cbx3b (ENSGACG00000008334)

MRKKQTAKQRKTEETPVVQDFVVEKIIIRRRIFDGRAEYFLKWKGFDTAENTWEPEDNLDCEPILIDEFLRNTHFPE  
GNEEDQRAERQLIPKEEMTEQETEIIVSPGDRQSDTPTDL SAYREPECIIGSTDRQGELMFLVKWKNSDVALPAR  
REASARCPQVVIDFYEKLTWHCGEEEQ

>Hco\_LOC109522111

MGKKQNTKSRKDSQGGQGTQEEPEEFVVEKVLDQRIVNGKVEFFLKWKGFTEADNTWEPEENLDCPELINAFLEA  
QKNIKEKPASLKRKAPADETEMDAKKKDAPEKPRGFARKLDPERIIGATDSSGELMFLMKWKDSDEADLVPAREA  
NTKCPQVVIAFYERLTHWSCPEDIAQ

>Hco\_LOC109525650

MRKKQTAKQRKTEDSCDVQEFVVEKITRRRIFNGRVEYFLKWKGFTADNTWEPEDNLDCPELIEEYLRNNPSNE  
NEEVKQEFVPKEEMTEGTEISPPQIHTQPCGDDPDSPADLAAYPELECIIGSADRRGELMFLVKWKNSGDVALLP  
AHEASTRCPQAVIDFYEQKLTWHCGDDEQ

>Pki\_LOC111846950

MGKKQNGKSKKEMEQQEEFVVEKVIDQRIVNGKVEYFLKWKGFTDADNTWEPEENLDCPDLIGAFLATQKSAVEL  
DSNKRKPSTDGTDSEESKTKKKKDVAEKPRGFARNLEPERIIGATDSSGELMFLMKWKDSDEADLVPKAEANVR  
PQVVIAFYEERLTHWSCPEDEQQ

>Pki\_LOC111838987

MRKKQNMKHKRNEETTUVQEFVVEKIIQRRVSNKGVEYFLKWKGFSADNTWEPEDNLDCPELIEEFLKSLAKNM  
EVGEDLESPQPPKPLEVPADVEPQQTEQQPLAEHHGNALQEPWQGQETERPASFTSHFEPERIIGSTDKQGELMFL  
VKWKGTDQVALLPAREASTRCPKIVIAYYEEKLTWHSGDEDQQ

>Sfo\_LOC108933414

MGKKQTSKSRKEMEQQEEFVVEKVLDQRIVNEKVEYLLKWKGFSADNTWEPEENLDCPELIEEFLASQKSAER  
PDSNKRKQSTDEMETEEAKSKKKKDQSEKPRGFARNLEPERIIGATDSSGELMFLMKWKDSDEADLVPKAEANVR  
CPQVVIAFYEERLTHWSCPEDEHQ

>Sfo\_LOC108933440

KGRGFLAHVVTRSGARGEARPREKVCCKAVFNQIRFRALVKKQASKKNKEMEQTQEFIVEKILDQRVVDGKVEY  
LLKWKGFSADNTWEPEENLDCPELIEAFLASQKCVVERPDCKRRQSTDQMESEESKVKNVTKRPHGFARSLEP  
ERIIGATDSSGELMFLMKWKDSNEADMVPAKEANMRCPQVVIAFYEERLSWNSCSEDEHC

>Sfo\_LOC108927377

MRKKQNVKHKRTEETTUVQEFVVEKIIQRRVNVNGKVEYFLKWKGFTDADNTWEPEDNLDCPELIEEFLRSLPGQG  
DHNVEDLQLPEVPQLTEPAELDSQPTLQQPLEEPLQGVREPGDQETGSPTGLVPQYEPETCIIGSTDRQGELMFLV  
KWKGTEEVALMSAREASARCPQIVIAFYEEKLTWNSRDDDQQ

>Gmo\_cbx3 (Gene ID: 115535606)

MGKKQNTKSAKKDVAEEPEEFVVEKVLDQRLVNGKVEFFLKWKGFTEADNTWEPEENLDCPELISAFLEAHKSIK  
EKPATVKKRSSADESEPEAKKDVSDKPRGFARNLDPERIIGATDSSGELMFLMKWKDSDEADLVPAREANSRCP  
QVVISFYEERLTHWSCPEDEA

>Gmo\_LOC115554036

MMRKKQTVRQRKPEETTMVQEFVVEKIIIRRVFNNGKVEYFLKWKGFTDADNTWEPQDNLDCPELIDFLRNMRLS  
DNEEQPQEFILNEELSEQEAEICSQYREQSDVLDVDFQKRQDVTGAGLDLDPDLELDLNREPECIIGSTDQHGELM  
FLVKWKTSVSLLAAREASARCPQAVVDVDFYQRRLNWHSGDEDQ

>Ipu\_cbx3 (Gene ID: 108271872)

MRKKQNVKNRKAETTTUVQEFAVEKIIIRRVNDGKVEYYLKWKGFDAENTWEPEDNLDCPELIEEFLRNLA VSG  
ETERKDNPLDPVVIQPKKEQTELDANIHRQQSEKEQTVCTGEGSTDHNTETTNDQSLIQEPERIIGSTDRQGELM  
FLIKWKDTDDVALLSAREASVRWPKMVIGFYEDKLSYHEEEEQ

>Ipu\_cbx3-like (Gene ID: 100528511)

MGKKQTSKSKKEMEPEEFVVEKVMDQRLVNGKVEFFLKWKGFDPDSNTWEPEENLDCPELIAAFLESQKGVVEK  
PDSNKRKSSTDEPETEESKAKKKKELNEKPRGFARNLEPERIIGATDSSGELMFLMKWKDSDEADLVPAREANTH  
CPQVVIAFYEERLTHWSCPEDEQH

>Eel\_LOC113571151

MRKKQNVKNRKAETTTUVQEFAVEKIIIRRVNDGKVEYYLKWKGFDAENTWEPEDNLDCPELIEEFLRNLA VSG  
ETGRGDSPAPEPVIQPKKEELTEFDADQQSELIEREASDPGDCDPKAVAEQPPTPEPECIIGSTARHGELMFLVKW  
RDMDDVALLSAREASSRWPQMVI GFYEEKLTWHAEEEQ

>Eel\_LOC113580431

MYMRGRLVARLCFSSFQPRNALVPVVEEEVWLASCQEAPYKTPARLLHLCNRLYKANMGKKQLNKSKEVEEPEE  
FVVEKVLDQRVNVNGKVEFFLKWKGFPESDNTWEPEENLDCPELIAAFLESQKGVVEKPD SNKRKPSTDEPETEES  
KAKKKKETNEKPRGFARNLEPERIIGATDSSGELMFLMKWKDSDEADLVPAREANTRCPQVVIAFYEERLTHWSC  
PEDEQQ

>Cha\_cbx3 (Gene ID: 105907686)

MDVRPKRPLSQETAAMGKKQMKGSKKEVSEPEEFVVEKVMQDRVVNGKVEYFLKWKGFSDADNTWEPEENLDCPE  
LIAAFHVAQKGVVEKPDSNKRKTSTDEPETEESKAKKKKESEKPRGFARNLEPERIIGATDSSGELMFLMKWKDS  
DEADLVPAREANTRCPQVVISFYEEERLTWHSCPEDEQQ

>Cha\_LOC105911400

MRKKQNVKHRPPEEATVVVKHVQEFVVEKIIRRRVMDGKVEYFLKWKGFDTAENTWEPEDNLDCEPILIEEFLRGL  
ALGRNPSEEGGPLPQHQIQPKEEEEEVETERHQQCPAQALEPLQERTAIPECIMGRIEPECIMGHIEPGCIIGST  
DRHGELTFLIKWKDSEVALMSAREVSEARNPQMVI AFYEERLRWTSADDEEP

>Dcl\_LOC114797297

MGKKQLTKSKKEVSEPEEFVVEKVIDQDRVVNGKVEFFLKWKGFDTADNTWEPEENLDCPELISAF LDSQKGVVEK  
PESNKRKPSTEEPESEENKAKKKKEANEKPRGFARNLEPERIIGATDSSGELMFLMKWKDSDEADLVPAREANTR  
CPQVVISFYEEERLTWHSCPEDEQQ

>Dcl\_LOC114790202

MRKKQNVKHKRTEEKAVVQEFVVEKIIRRRVTDGRVEYFLKWKGFNDTNTWEPEDNLDCEPILIEEFLRGLSLSG  
KAEGDDVPSLGSHIQLKEEQEDLETPIQDEPGDSGAQEPSEERTGIPEDYTSHLEPECIIGSTDKEGELMFLIRW  
KDSEVALMSAREASMRCPQMVISFYEEKLTWQSAEEEEQQ

>Elu\_LOC105023664

MGKKQNGKGKKEVLEADPPEEYVVEKVMQDRIVNGKVEFFLKWKGFTEADNTWEPEENLDCPELISAFLEAQKSV  
VEKPDSNKRKSSTDEPETEENKAKKKKDVS DKPRGFARNLAPERIIGATDSSGELMFLMKWKDSDEADLVPAREA  
NTRCPQVVISFYEEERLTWHSCPEDEAQ

>Elu\_LOC105018804

MRKKQNVKQKKAETITATIVTTPSESTTNTTPVVQEFVVEKIIRRRVSDGRVEYFLKWKGFNDADNTWEPEDNLD  
CEPILIEEFLRNLC LSGENHNEEENQFPVDPELVPKEELTEQETEISSQQVYEEQRKMELQEPGDQESDSPTDLNL  
IGPLEPERIIGSTDRRGELMFLVKWKNSEVALLSAREASARCPQVVVAFYEEKLTWHSGDEDQ

>Ssa\_cbx3 (Gene ID: 100195583)

MKTSSPLVSQPNMGKKQNGKGKKEVLEAEPPEEYVVEKVMQDRIVNGKVEFFLKWKGFTEADNTWEPEDNLDCEP  
LISAFLEAQKNVVEKPDSNKRKSSTDEPESEENKAKKKKDVS DKPRGFARSLDPERIIGATDSSGELMFLMKWKD  
SDEADLVPAREANTRCPQVVISFYEEERLTWHSCPEDEAQ

>Ssa\_LOC106588845

MGKKQNGKGKKEVLEAEPPEEYVVEKVMQDRIVNGKVEFFLKWKGFTEADNTWEPEDNLDCEPILISAFLEAQKT  
VENPDSNKRKSSTDEPETEGNKAKKKKDVS DKPRGFARSLDPERIIGATDSSGELMFLMKWKDSDEADLVPAREA  
NTRCPQVVISFYEEERLTWHSCPEDEAQ

>Ssa\_LOC106573104

MKSFCCKDTGTLHLATHLTNHWTHSVVSVSACSSVCYIVAYFCHRQSWTESVRMRKKQNVKQKKAETITATIITP  
TPLTTTTLSTTTTPVVQEFVVEKIIHRRVSNRVEYYLKWKGFDTADNTWEPEDNLVCEPILIEEFLRNLC LSGEN  
QVEEENLQSVPELVPKEELAEQETEIQVYSEQRHNDLQEPADRESPTSALTCPLEAERIIGSTD RHGELMFLI  
KWKNRDEVALLSAREASARYPEVVVAFYEDKLTWHSGDEDQ

>Omy\_LOC110506239

MRKKQNVKQKKAETIITPTPLTTTTLSTTTTAAAVVQEFVVEKIIHRRVFNGRVEYYLKWKGFDTADNTWEPEDN  
LVCEPILIEEFLRNLC LSGENQVEEENLRPVEPELVPKEELAEQETEIQVYSEQRHNDLQEPADQDSPTALTCPLE  
PADQDSPTALTCPLEPEHIIIGSTERHGELMFLIKWKNRDEVALLSAREASARYPEMVVAFYEDKLTWHSGDEDQ

>Omy\_LOC110496562

MGKKQNGKGKKEVLEAEPPEEYVVEKVMQDRIVNGKVEFFLKWKGFTEADNTWEPEDNLDCEPILISAFLEAQKT  
VENPDSNKRKSSTDEPETEGNKAKKKKDVS DKPRGFARSLDPERIIGATDSSGELMFLMKWKDSDEADLVPAREA  
NTRCPQVVISFYEEERLTWHSCPEDEAQ

>Omy\_LOC110487945

MGKKQNGKGKKEVLEAEPPEEYVVEKVMQDRIVNGKVEFFLKWKGFTEADNTWEPEDNLDCEPILISAFLEAQKNV  
VEKPDSNKRKSSTDEPETEENKAKKKKDVS DKPRGFARSLDPERIIGATDSSGELMFLMKWKDSDEADLVPAREA  
NTRCPQVVISFYEEERLTWHSCPEDEAQ

>Oki\_LOC109878229  
MRKKQNVKQRKAETIITPTPLTTTTLSTTTTAAAVVQEFVVEKIIQRRLYNGRVEYYLKWKGFTEADNTWEPEDN  
LVCPELIEEFRLNLCLSGENQVEEENLRPVEPELVKPEELAEQETEIQVYSEQRHNDLQEPADQDSPTALTCPLE  
PERIIGSTDRHGELMFLIKWKNRDEVALLSAREASARYPEVVVAFYEDKLTWHSGDEDQ

>Oki\_LOC109907267  
MGKKQNGKGKKEVLEAEPPEEYVVEKVMQDRIVNGKVEFFLKWKGFTEADNTWEPEDNLDCEPILISAFLEAQKTV  
VENPDSNKRKSSTDEPETEGNKAKKKKDVSDKPRGFARSLDPERIIGATDSSGELMFLMKWKDSDEADLVPAREA  
NTRCPQVVISFYEEERLTWHSCPEDEAQ

>Oki\_LOC109903322  
MGKKQNGKGKKEVLEAEPPEEYVVEKVMQDRIVNGKVEFFLKWKGFTEADNTWEPEDNLDCEPILISAFLEAQKNV  
VEKPDSNKRKSSTDEPETEENKAKKKKDVSDKPRGFARSLDPERIIGATDSSGELMFLMKWKDSDEADLVPAREA  
NTRCPQVVISFYEEERLTWHSCPEDEAQ

>Sal\_LOC111955440  
MGKKQNGKGKKEVLEAEPPEEYVVEKVMQDRIVNGKVEFFLKWKGFTEADNTWEPEDNLDCEPILISAFLEAQKTV  
VENPDSNKRKSSTDEPETEGNKAKKKKDVSDKPRGFARSLDPERIIGATDSSGELMFLMKWKDSDEADLVPAREA  
NTRCPQVVISFYEEERLTWHSCPEDEAQ

>Sal\_LOC112070715  
MGKKQNGKGKKEVLEAEPPEEYVVEKVMQDRIVNGKVEFFLKWKGFTEADNTWEPEDNLDCEPILISAFLEAQKNV  
VEKPDSNKRKSSTDEPETEENKAKKKKDVSDKPRGFARSLDPERIIGATDSSGELMFLMKWKDSDEADLVPAREA  
NTRCPQVVISFYEEERLTWHSCPEDEAQ

>Hhu\_ENSHHUG00000039337  
MTEVIGTLEDVVPVEEEEEEEYVVEKVLNRRVVKGRVEYLLKWKGFSDDDNTWEPEDNLDCEPDLIAQFLQKQKL  
AHESVGKRKSAETSVEGEESRPKKRKDDPEKLRGFARGLDPERIIGATDSTGELMFLMKWKNSDEADLVPKEAN  
VKCPQVVISFYEEERLTWHSYPTTEEKEDDKN

>Hhu\_cbx3a (ENSHHUG00000011830)  
MGKKQNGKGKKEVLEAEPPEEYVVEKVMQDRIVNGKVEFFLKWKGFTEADNTWEPEDNLDCEPILISAFLEAQKNV  
VEKPDSNKRKSSTDEPESEENKAKKKKDVSDKPRGFARSLDPERIIGATDSSGELMFLMKWKDSDEADLVPAREA  
NTRCPQVVISFYEEERLTWHSCPEDEAQ

>Hhu\_ENSHHUG00000050410  
MGKKQNGKGKKEVLEAEPPEEYVVEKVMQDRIVNGKVEFFLKWKGFTEADNTWEPEDNLDCEPILISAFLEAQKTV  
VENPDSNKRKSSTDEPETEGNKAKKKKDVSDKPRGFARSLDPERIIGATDSSGELMFLMKWKDSDEADLVPAREA  
NTRCPQVVISFYEEERLTWHSCPEDEHV

---

**Supplementary File S3. List of *Cbx3* protein sequences encoded by the teleost genomes identified in this study.**
