# Supplementary material for: The Polycomb Orthologues in Teleost Fishes and Their Expression in the Zebrafish Model
Source: MDPI journal article supplement (doi:10.3390/genes11040362), 2020-03-27
Supplement: s1 [file s1]

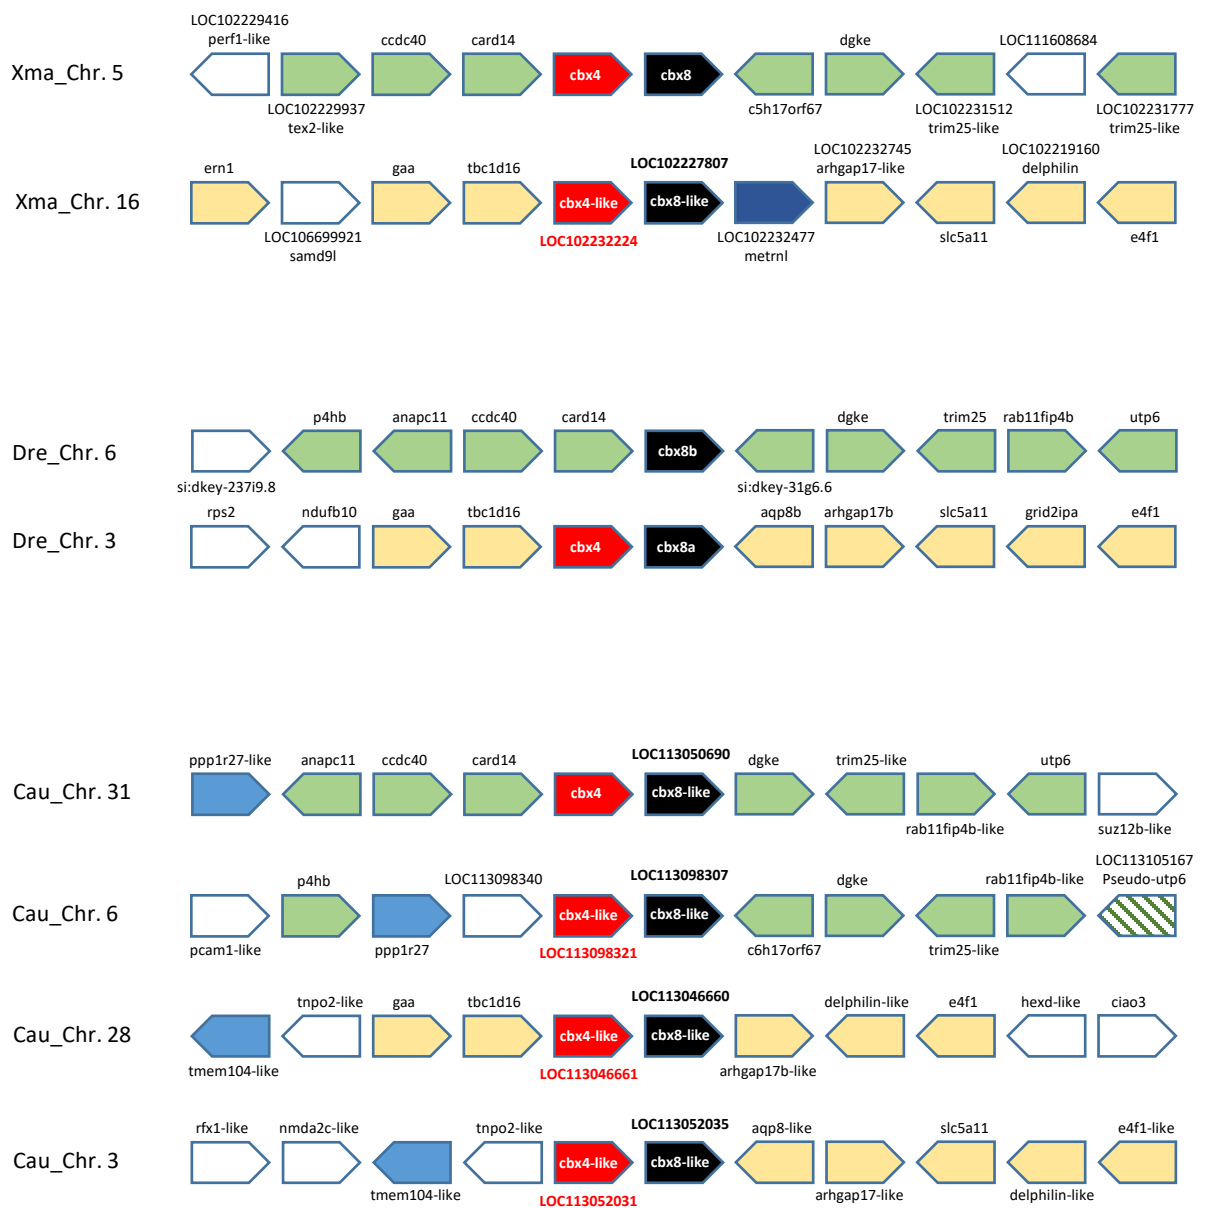

**Supplementary Figure S5. Blocks of synteny at the *cbx4-cbx8* locus in teleost fishes.** The *cbx4* genes are shown in red, *cbx8* in black while orthologous gene loci are highlighted with different colors. Chromosomal locations of *cbx4*, *cbx8* and the neighboring gene loci were drawn based on information from the NCBI Gene server. Chromosome (Chr.) or linkage group (LG) numbers are indicated. Xma, platyfish (*Xiphophorus maculatus*, Cyprinodontiformes); Dre, zebrafish (*Danio rerio*, Cypriniformes); Cau, goldfish (*Carassius auratus*, Cypriniformes).
