# Supplementary material for: The Polycomb Orthologues in Teleost Fishes and Their Expression in the Zebrafish Model
Source: MDPI journal article supplement (doi:10.3390/genes11040362), 2020-03-27
Supplement: s1 [file s1]

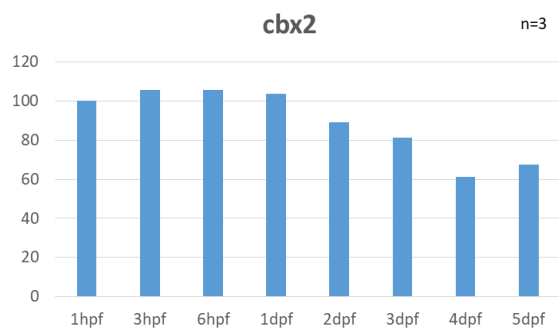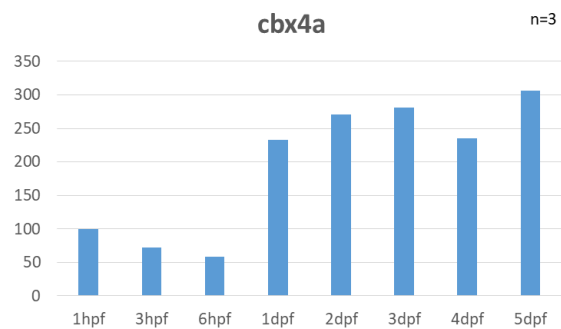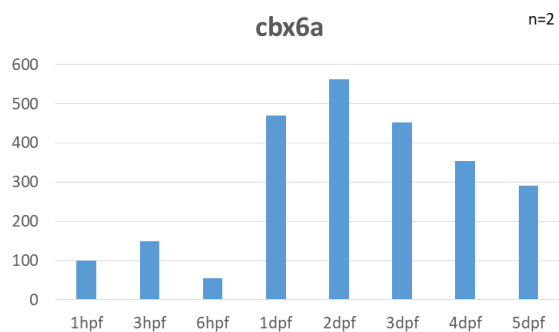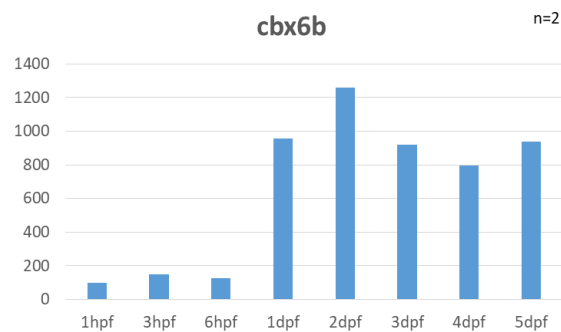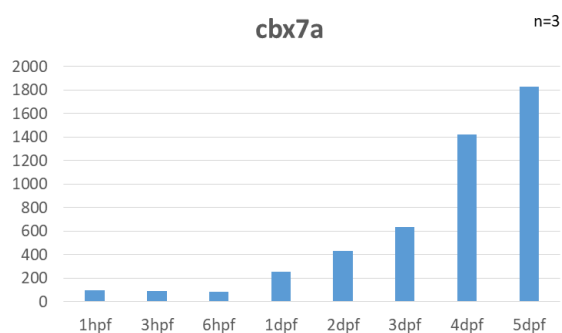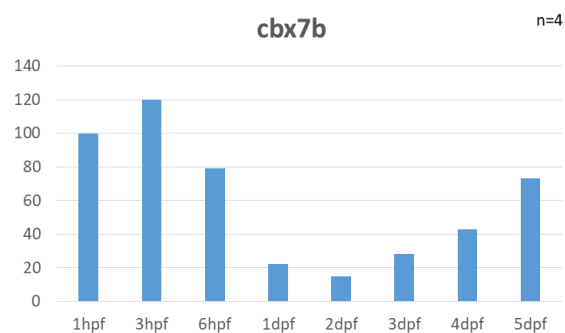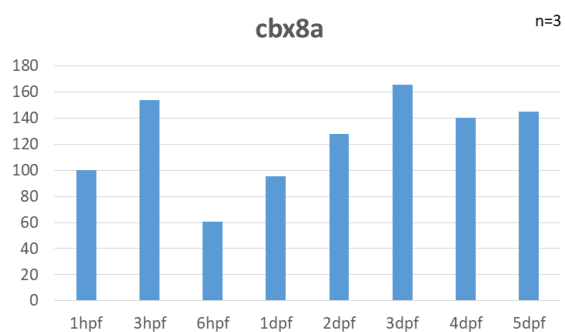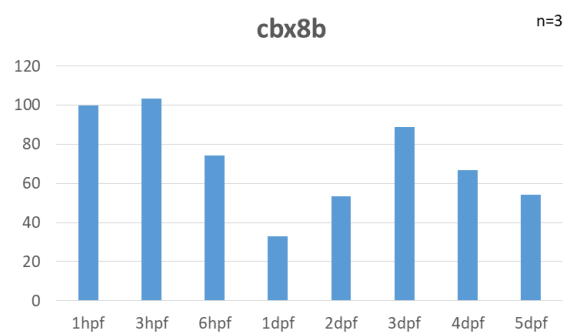

**Supplementary Figure S6. Average quantification of RT-PCR amplicons.** The number of experiments done (n) is indicated.
