# Supplementary material for: The Polycomb Orthologues in Teleost Fishes and Their Expression in the Zebrafish Model
Source: Genes (Basel). 2020 Mar 27;11(4):362. doi: 10.3390/genes11040362 (PMC7230241; doi:10.3390/genes11040362)
Supplement: Supplementary file 1 [file genes-11-00362-s001.zip]

Archive with 14 entries (14 files):
- Supp Material/Supp Figure S1.pdf
- Supp Material/Supp Figure S2.pdf
- Supp Material/Supp Figure S3.pdf
- Supp Material/Supp Figure S4.pdf
- Supp Material/Supp Figure S5.pdf
- Supp Material/Supp Figure S6.pdf
- Supp Material/Supp File S1.pdf
- Supp Material/Supp File S2.pdf
- Supp Material/Supp File S3.pdf
- Supp Material/Supp File S4.pdf
- Supp Material/Supp File S5.pdf
- Supp Material/Supp File S6.pdf
- Supp Material/Supp Table S1.pdf
- Supp Material/Supp Table S2.pdf
